# Supplementary material for: Palladium-catalyzed decarboxylative allylation of vinyloxazolidin-2-ones with sodium sulfinates: stereoselective assembly of highly functionalized (Z)-allylic amines
Source: Royal Society of Chemistry journal article supplement (doi:10.1039/d3cc02237d), 2023-01-01

Supporting Information

**Palladium-Catalyzed Decarboxylative Allylation of Vinyloxazolidin-2-ones with Sodium Sulfinates: Stereoselective Assembly of Highly Functionalized (Z)-Allylic Amines**

Ledan Zhou,<sup>a,b,c</sup> Ding Liu,<sup>b,c</sup> Huashan Huang,<sup>b,c</sup> Ke Zhang,<sup>b,c</sup> Yingtang Ning,<sup>\*b,c</sup>  
Fen-Er Chen<sup>\*a,b,c</sup>

a. College of Chemistry, Fuzhou University, Fuzhou 350102, China

b. Engineering Center of Catalysis and Synthesis for Chiral Molecules, Fudan University, 200433 Shanghai, China

c. Shanghai Engineering Center of Industrial Catalysis for Chiral Drugs, 200433 Shanghai, China

# Table of Contents

|                                                                              |           |
|------------------------------------------------------------------------------|-----------|
| <b>1. Supporting Figures and Tables.</b> .....                               | <b>3</b>  |
| <b>Table S1.</b> Effect of solvents.....                                     | 3         |
| <b>Table S2.</b> Effect of reaction temperature .....                        | 3         |
| <b>2. General Procedures.</b> .....                                          | <b>4</b>  |
| <b>3 Preparation of vinyloxazolidin2-ones 1</b> .....                        | <b>5</b>  |
| <b>3.1</b> General procedure for preparation of vinyloxazolidin2-ones 1..... | <b>5</b>  |
| <b>3.2.</b> Characterization Data of Vinyloxazolidin2-ones 1 .....           | <b>5</b>  |
| <b>4. Synthesis of (Z)-allylic amines 3</b> .....                            | <b>11</b> |
| <b>4.1.</b> General Procedure of Decarboxylative Allylation .....            | <b>11</b> |
| <b>4.2.</b> Characterization Data of Allylic Amines 3.....                   | <b>12</b> |
| <b>5. Synthetic transformations of 3a</b> .....                              | <b>24</b> |
| <b>5.1.</b> Reductive desulfonation of 3a. ....                              | <b>24</b> |
| <b>5.2.</b> Selective hydrogenation of 3a.....                               | <b>26</b> |
| <b>6. Competition experiments</b> .....                                      | <b>27</b> |
| <b>7. Computational Details</b> .....                                        | <b>29</b> |
| <b>7.1</b> Computational Methods .....                                       | <b>29</b> |
| <b>7.2</b> Discussions on Reaction Pathways. ....                            | <b>30</b> |
| <b>Figure S1.</b> Energy diagram for the formation of <b>A5</b> .....        | 30        |
| <b>Figure S2.</b> Energy Profiles for the substitution step. ....            | 31        |
| <b>9.3</b> Cartesian Coordinate of Calculated Structures .....               | <b>31</b> |
| <b>8. Reference</b> .....                                                    | <b>62</b> |
| <b>9. NMR Spectra.</b> .....                                                 | <b>63</b> |

## 1. Supporting Figures and Tables.

**Table S1.** Effect of solvents.

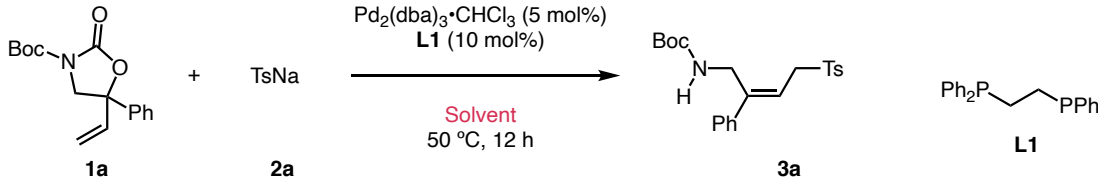

| Entry <sup>a</sup> | Solvent | Yield (%) <sup>b</sup> | Z/E <sup>b</sup> |
|--------------------|---------|------------------------|------------------|
| 1                  | DCE     | 58                     | 82:18            |
| 2                  | THF     | 82                     | 77:23            |
| 3                  | toluene | 57                     | 80:20            |
| 4                  | MeCN    | 59                     | 90:10            |

<sup>a</sup> Reactions were performed with **1** (0.12 mmol) and **2** (0.18 mmol, 1.5 equiv.) in THF (6 ml). <sup>b</sup> Z:E ratios were determined by <sup>1</sup>H NMR.

**Table S2.** Effect of reaction temperature.

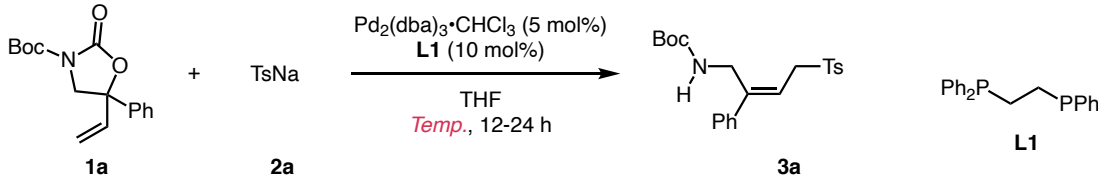

| Entry <sup>a</sup> | Temp (°C) | Time (h) | Yield (%) <sup>b</sup> | Z/E <sup>b</sup> |
|--------------------|-----------|----------|------------------------|------------------|
| 1                  | 20        | 24       | 22                     | n.d.             |
| 2                  | 30        | 24       | 36                     | n.d.             |
| 3                  | 40        | 12       | 75                     | 79:21            |
| 4                  | 50        | 12       | 83                     | 77:23            |
| 5                  | 60        | 12       | 32                     | n.d.             |

<sup>a</sup> Reactions were performed with **1** (0.12 mmol) and **2** (0.18 mmol, 1.5 equiv.) in THF (6 ml). <sup>b</sup> Z:E ratios were determined by <sup>1</sup>H NMR.

## 2. General Procedures.

All commercial solvents and chemicals were purchased from Bidepharm, Leyan, Energy Chemical, and TCI and used as received. All reactions were performed in oven-dried glassware under a positive pressure of nitrogen.

Analytical thin-layer chromatography (TLC) was carried out using 0.2 mm commercial silica gel plates impregnated with a fluorescent indicator (254 nm). TLC plates were visualized by exposure to UV light (254 nm). Flash column chromatography was performed using granular silica gel (60-Å pore size, 40–63  $\mu\text{m}$ , 4–6%  $\text{H}_2\text{O}$  content, Synthware).

$^1\text{H}$  NMR spectra were recorded with a Bruker AM400 (400 MHz) spectrometer. Chemical shifts are reported in parts per million (ppm) units on the delta ( $\delta$ ) scale, and are referenced from the residual protium in the  $\text{CDCl}_3$  (7.26 ppm). Data are reported as follows: chemical shift, [multiplicity (s = singlet, d = doublet, t = triplet, m = multiplet), coupling constant(s) in Hertz (Hz)].  $^{13}\text{C}$  NMR spectra were recorded with a Bruker AM 400 (100 MHz) spectrometer. Chemical shifts are reported in parts per million (ppm) units on the delta ( $\delta$ ) scale, and are referenced from the carbon resonances of  $\text{CDCl}_3$  (77.23 ppm).  $^{19}\text{F}$  NMR spectra were recorded with a Bruker AM400 (376 MHz) spectrometer. High resolution mass spectra (HRMS) were recorded on a Bruker microTOF Q III spectrometer with electrospray ionization (ESI). Melting points (mp) were recorded on an SRS–optic melting point apparatus.

### 3 Preparation of vinyloxazolidin2-ones 1

#### 3.1 General procedure for preparation of vinyloxazolidin2-ones 1.

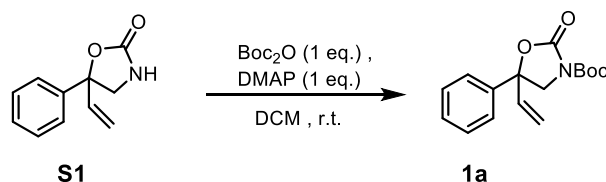

Vinyloxazolidin2-ones (**1a-1o**) were prepared following previously reported procedures:<sup>[1]</sup>

To a solution of S1 (567.6 mg, 3.00 mmol) in DCM (12 ml) was added Boc<sub>2</sub>O (654.8 mg, 3.00 mmol) and DMAP (366.5 mg, 3.00 mmol) at room temperature. The mixture was stirred for 30 min. The reaction mixture was concentrated under reduced pressure, and the residue was purified by column chromatography on silica gel (Petroleum ether/EtOAc = 10:1 as eluent) to afford **1a** (607.6 g, 2.10 mmol, 70% yield) as a light yellow oil.

#### 3.2. Characterization Data of Vinyloxazolidin2-ones 1

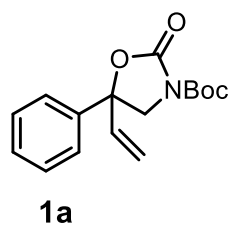

(**1a**): 70% yield, 607.6 mg. Light yellow liquid. <sup>1</sup>H NMR (400 MHz, CDCl<sub>3</sub>) δ 7.45 – 7.31 (m, 5H), 6.11 (dd, *J* = 17.1, 10.7 Hz, 1H), 5.43 – 5.29 (m, 2H), 4.24 – 4.08 (m, 2H), 1.53 (s, 9H). <sup>13</sup>C NMR (100 MHz, CDCl<sub>3</sub>) δ 152.3, 149.4, 140.1, 138.5, 129.0, 128.6, 125.0, 117.9, 85.1, 82.4, 55.4, 28.1.

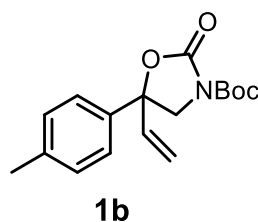

**(1b)**: 73% yield, 663.9 mg. Light yellow liquid.  $^1\text{H}$  NMR (400 MHz,  $\text{CDCl}_3$ )  $\delta$  7.42 (d,  $J = 8.3$  Hz, 2H), 7.35 (d,  $J = 8.1$  Hz, 2H), 6.24 (dd,  $J = 17.1, 10.7$  Hz, 1H), 5.57 – 5.43 (m, 2H), 4.35 – 4.20 (m, 2H), 2.50 (s, 3H), 1.67 (s, 9H).  $^{13}\text{C}$  NMR (100 MHz,  $\text{CDCl}_3$ )  $\delta$  151.3, 149.5, 139.6, 138.2, 137.1, 129.6, 124.4, 116.3, 86.0, 82.1, 56.9, 30.5, 23.2.

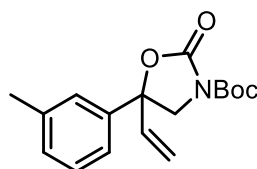

**1c**

**(1c)**: 74% yield, 673.0 mg. Light yellow liquid.  $^1\text{H}$  NMR (400 MHz,  $\text{CDCl}_3$ )  $\delta$  7.28 (d,  $J = 10.0$  Hz, 1H), 7.21 (s, 1H), 7.16 (d,  $J = 7.7$  Hz, 2H), 6.10 (dd,  $J = 17.1, 10.6$  Hz, 1H), 5.47 – 5.26 (m, 2H), 4.28 – 3.99 (m, 2H), 2.37 (d,  $J = 1.7$  Hz, 3H), 1.53 (s, 9H).  $^{13}\text{C}$  NMR (100 MHz,  $\text{CDCl}_3$ )  $\delta$  151.3, 149.5, 140.1, 138.8, 138.2, 129.3, 128.9, 125.6, 122.0, 116.3, 84.2, 81.3, 54.9, 28.1, 21.7.

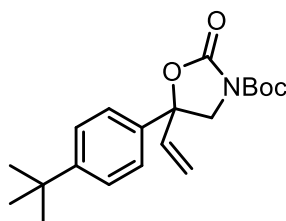

**1d**

**(1d)**: 65% yield, 673.1 mg. Yellow solid. Mp = 75.4-76.9 °C.  $^1\text{H}$  NMR (400 MHz,  $\text{CDCl}_3$ )  $\delta$  7.42 (d,  $J = 8.6$  Hz, 2H), 7.31 (d,  $J = 8.6$  Hz, 2H), 6.10 (dd,  $J = 17.1, 10.7$  Hz, 1H), 5.44 – 5.28 (m, 2H), 4.21 – 4.07 (m, 2H), 1.53 (s, 9H), 1.31 (s, 9H).  $^{13}\text{C}$  NMR (100 MHz,  $\text{CDCl}_3$ )  $\delta$  151.7, 151.4, 149.5, 138.1, 137.0, 126.0, 125.9, 124.8, 116.2, 84.2, 81.3, 54.8, 34.7, 31.4, 28.1.

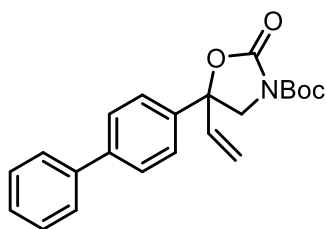

**1e**

(**1e**): 75% yield, 821.6 mg. Light yellow solid. Mp = 86.3-87.4 °C. <sup>1</sup>H NMR (400 MHz, CDCl<sub>3</sub>) δ 7.64 – 7.53 (m, 4H), 7.48 – 7.39 (m, 4H), 7.35 (d, *J* = 7.3 Hz, 1H), 6.14 (dd, *J* = 17.1, 10.6 Hz, 1H), 5.50 – 5.30 (m, 2H), 4.28 – 4.11 (m, 2H), 1.54 (s, 9H). <sup>13</sup>C NMR (100 MHz, CDCl<sub>3</sub>) δ 151.3, 149.5, 141.6, 140.3, 139.0, 138.0, 129.0, 127.8, 127.7, 127.2, 125.5, 116.6, 84.3, 81.2, 54.8, 28.1.

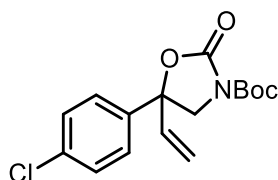

**1f**

(**1f**): 71% yield, 688.2 mg. Light yellow liquid. <sup>1</sup>H NMR (400 MHz, CDCl<sub>3</sub>) δ 7.43 – 7.31 (m, 4H), 6.10 (dd, *J* = 17.1, 10.7 Hz, 1H), 5.44 – 5.28 (m, 2H), 4.24 – 4.07 (m, 2H), 1.54 (s, 9H). <sup>13</sup>C NMR (100 MHz, CDCl<sub>3</sub>) δ 150.8, 149.0, 138.4, 137.4, 134.3, 128.9, 126.3, 116.6, 84.1, 80.6, 54.5, 27.8.

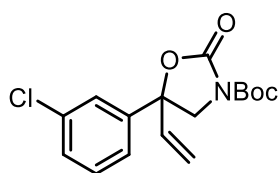

**1g**

(**1g**): 78% yield, 756.0 mg. Brown liquid. <sup>1</sup>H NMR (400 MHz, CDCl<sub>3</sub>) δ 7.39 (s, 1H), 7.36 – 7.32 (m, 2H), 7.28 (dd, *J* = 4.3, 1.9 Hz, 1H), 6.08 (dd, *J* = 17.1, 10.7 Hz, 1H), 5.45 – 5.33 (m, 2H), 4.24 – 4.03 (m, 2H), 1.54 (s, 9H). <sup>13</sup>C NMR (100 MHz, CDCl<sub>3</sub>) δ 150.9, 149.2, 142.1, 137.4, 135.0, 130.3, 128.8, 125.3, 123.1, 117.0, 84.4, 80.6, 54.7, 28.0.

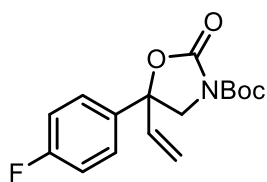

**1h**

(**1h**): 70% yield, 645.0 mg. Light yellow liquid.  $^1\text{H}$  NMR (400 MHz,  $\text{CDCl}_3$ )  $\delta$  7.40 – 7.30 (m, 2H), 7.09 – 6.98 (m, 2H), 6.06 (dd,  $J = 17.1, 10.7$  Hz, 1H), 5.39 – 5.26 (m, 2H), 4.24 – 3.97 (m, 2H), 1.48 (s, 9H).  $^{13}\text{C}$  NMR (100 MHz,  $\text{CDCl}_3$ )  $\delta$  162.5 (d,  $J = 247.9$  Hz), 151.6, 150.0, 138.2, 135.7 (d,  $J = 3.2$  Hz), 126.9 (d,  $J = 8.3$  Hz), 116.6, 115.8 (d,  $J = 21.8$  Hz), 84.2, 80.8, 54.7, 27.9.  $^{19}\text{F}$  NMR (376 MHz,  $\text{CDCl}_3$ )  $\delta$  -113.1.

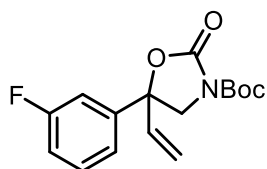

**1i**

(**1i**): 79% yield, 727.9 mg. White crystal. Mp = 62.2-63.5 °C.  $^1\text{H}$  NMR (400 MHz,  $\text{CDCl}_3$ )  $\delta$  7.39 (s, 1H), 7.19 – 7.01 (m, 3H), 6.08 (dd,  $J = 17.1, 10.7$  Hz, 1H), 5.45 – 5.31 (m, 2H), 4.25 – 4.01 (m, 2H), 1.53 (s, 9H).  $^{13}\text{C}$  NMR (100 MHz,  $\text{CDCl}_3$ )  $\delta$  164.1, 161.7, 150.0 (d,  $J = 166.1$  Hz), 142.6 (d,  $J = 7.1$  Hz), 137.4, 130.7 (d,  $J = 8.3$  Hz), 120.5 (d,  $J = 3.1$  Hz), 116.8, 115.5 (d,  $J = 21.1$  Hz), 112.4 (d,  $J = 23.5$  Hz), 84.3, 80.6, 54.6, 28.0.  $^{19}\text{F}$  NMR (376 MHz,  $\text{CDCl}_3$ )  $\delta$  -111.1.

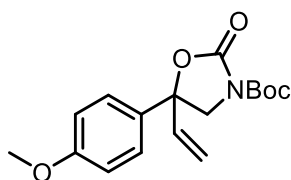

**1j**

(**1j**): 71% yield, 679.8 mg. Light yellow liquid.  $^1\text{H}$  NMR (400 MHz,  $\text{CDCl}_3$ )  $\delta$  7.30 (d,  $J = 8.8$  Hz, 2H), 6.91 (d,  $J = 8.9$  Hz, 2H), 6.08 (dd,  $J = 17.1, 10.7$  Hz, 1H), 5.45 – 5.22 (m, 2H), 4.22 – 4.03 (m, 2H), 3.80 (s, 3H), 1.52 (s, 9H).  $^{13}\text{C}$  NMR (100 MHz,  $\text{CDCl}_3$ )  $\delta$  159.7, 151.3, 149.5, 138.1, 131.8, 126.5, 116.3, 114.2, 84.2, 81.2, 55.5, 54.8, 28.1.



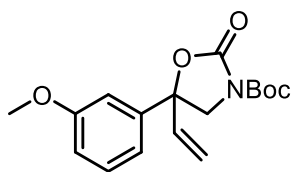

**1k**

(**1k**): 70% yield, 670.2 mg. White solid. Mp = 101.7-102.6 °C. <sup>1</sup>H NMR (400 MHz, CDCl<sub>3</sub>) δ 7.24 (s, 1H), 6.94 – 6.74 (m, 3H), 6.02 (dd, *J* = 17.1, 10.7 Hz, 1H), 5.43 – 5.16 (m, 2H), 4.17 – 3.95 (m, 2H), 3.73 (s, 3H), 1.45 (s, 9H). <sup>13</sup>C NMR (100 MHz, CDCl<sub>3</sub>) δ 156.0, 151.1, 149.3, 141.6, 137.9, 130.0, 117.0, 116.3, 113.9, 110.7, 84.1, 81.1, 55.4, 54.8, 28.0.

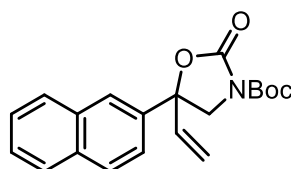

**1l**

(**1l**): 73% yield, 742.7 mg. Light yellow liquid. <sup>1</sup>H NMR (400 MHz, CDCl<sub>3</sub>) δ 7.95 – 7.80 (m, 4H), 7.57 – 7.49 (m, 2H), 7.42 (dd, *J* = 8.6, 2.0 Hz, 1H), 6.20 (dd, *J* = 17.1, 10.6 Hz, 1H), 5.49 – 5.35 (m, 2H), 4.32 – 4.18 (m, 2H), 1.53 (s, 9H). <sup>13</sup>C NMR (100 MHz, CDCl<sub>3</sub>) δ 151.3, 149.5, 137.9, 137.2, 133.1, 133.0, 129.0, 128.4, 127.8, 126.9, 124.1, 122.7, 116.9, 84.3, 81.4, 54.8, 28.1.

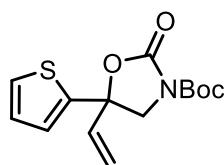

**1m**

(**1m**): 81% yield, 717.1 mg. Orange solid. Mp = 67.3-68.6 °C. <sup>1</sup>H NMR (400 MHz, CDCl<sub>3</sub>) δ 7.37 (d, *J* = 5.1 Hz, 1H), 7.10 (d, *J* = 1.5 Hz, 1H), 7.02 (dd, *J* = 8.8, 2.1 Hz, 1H), 6.16 (dd, *J* = 17.0, 10.6 Hz, 1H), 5.61 – 5.37 (m, 2H), 4.25 – 4.11 (m, 2H), 1.54 (s, 9H). <sup>13</sup>C NMR (100 MHz, CDCl<sub>3</sub>) δ 150.8, 149.3, 142.7, 136.9, 127.3, 127.0, 126.1, 117.1, 84.3, 79.2, 55.4, 28.0.

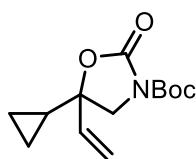

**1n**

(**1n**): 50% yield, 379.7 mg. Light yellow liquid.  $^1\text{H}$  NMR (400 MHz,  $\text{CDCl}_3$ )  $\delta$  5.80 (dd,  $J = 17.2, 10.8$  Hz, 1H), 5.52 – 5.19 (m, 2H), 3.84 – 3.73 (m, 2H), 1.53 (s, 9H), 1.17 (tt,  $J = 8.3, 5.3$  Hz, 1H), 0.63 – 0.43 (m, 4H).  $^{13}\text{C}$  NMR (100 MHz,  $\text{CDCl}_3$ )  $\delta$  151.6, 149.6, 136.5, 116.5, 84.0, 80.0, 53.3, 28.1, 18.3, 1.2, 0.9.

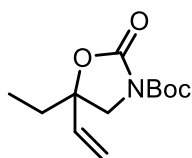

**1o**

(**1o**): 80% yield, 482.2 mg. Orange liquid.  $^1\text{H}$  NMR (400 MHz,  $\text{CDCl}_3$ )  $\delta$  5.78 (dd,  $J = 17.2, 11.0$  Hz, 1H), 5.52 – 5.13 (m, 2H), 3.94 – 3.53 (m, 2H), 1.78 (td,  $J = 14.4, 6.9$  Hz, 2H), 1.49 (s, 9H), 0.92 (t,  $J = 7.5$  Hz, 3H).  $^{13}\text{C}$  NMR (100 MHz,  $\text{CDCl}_3$ )  $\delta$  151.6, 149.5, 137.1, 115.9, 83.9, 80.9, 52.8, 31.9, 28.0, 7.4.

## 4. Synthesis of (Z)-allylic amines 3

### 4.1. General Procedure of Decarboxylative Allylation

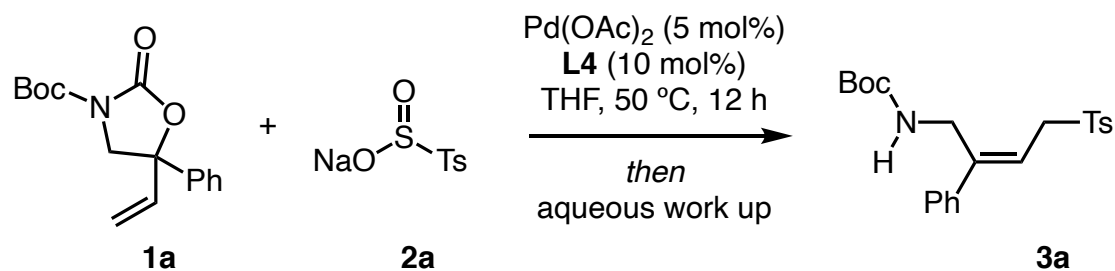

To a mixture of vinyloxazolidin-2-one **1a** (34.7 mg, 0.12 mmol), sodium p-toluene sulfonate (**2a**) (42.8 mg, 0.24 mmol), Pd(OAc)<sub>2</sub> (1.3 mg, 0.006 mmol) and dppp (5.3 mg, 0.012 mmol) was added THF (6 ml). The reaction was heated at 50 °C for 12 h. The reaction was cooled to room temperature and quenched with saturated aqueous NH<sub>4</sub>Cl solution (10 mL). The mixture was extracted with EtOAc, and the combined organic phases were washed with brine and dried over anhydrous Na<sub>2</sub>SO<sub>4</sub>. The solvent was removed under reduced pressure and the residue was purified by flash chromatography on silica gel (Petroleum ether/EtOAc= 2:1) to give desired products.

## 4.2. Characterization Data of Allylic Amines 3.

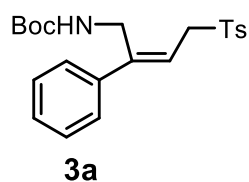

(**3a**): Light yellow liquid (43.5 mg, 91%). <sup>1</sup>H NMR (400 MHz, CDCl<sub>3</sub>) δ 7.80 (d, *J* = 8.2 Hz, 2H), 7.42 – 7.25 (m, 7H), 5.79 (t, *J* = 8.2 Hz, 1H), 4.50 (s, 1H), 4.11 (d, *J* = 8.3 Hz, 2H), 3.98 (d, *J* = 5.7 Hz, 2H), 2.46 (s, 3H), 1.37 (s, 9H). <sup>13</sup>C NMR (100 MHz, CDCl<sub>3</sub>) δ 155.7, 145.8, 145.2, 139.4, 135.9, 130.0, 128.7, 128.6, 128.5, 126.7, 116.3, 79.7, 56.3, 39.0, 28.5, 21.8. HRMS(ESI): calcd for C<sub>22</sub>H<sub>28</sub>NO<sub>4</sub>S<sup>+</sup> [M+H]<sup>+</sup>: 402.1730; Found: 402.1734.

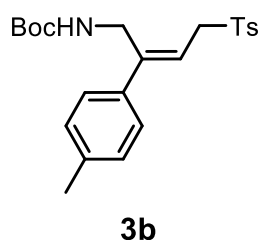

(**3b**): Light yellow liquid (46.2 mg, 93%). <sup>1</sup>H NMR (400 MHz, CDCl<sub>3</sub>) δ 7.79 (d, *J* = 8.2 Hz, 2H), 7.35 (d, *J* = 8.0 Hz, 2H), 7.23 (d, *J* = 8.0 Hz, 2H), 7.14 (d, *J* = 7.8 Hz, 2H), 5.78 (t, *J* = 8.2 Hz, 1H), 4.47 (s, 1H), 4.09 (d, *J* = 7.1 Hz, 2H), 3.95 (d, *J* = 5.7 Hz, 2H), 2.45 (s, 3H), 2.34 (s, 3H), 1.37 (s, 9H). <sup>13</sup>C NMR (101 MHz, CDCl<sub>3</sub>) δ 155.8, 145.5, 145.1, 138.5, 136.3, 135.9, 130.0, 129.4, 128.6, 126.51, 115.5, 79.6, 56.3, 38.9, 28.5, 21.8, 21.3. HRMS(ESI): calcd for C<sub>23</sub>H<sub>29</sub>NNaO<sub>4</sub>S<sup>+</sup> [M+Na]<sup>+</sup>: 438.1712; Found: 438.1710.

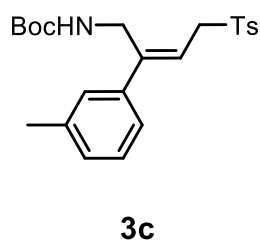

(**3c**): Light yellow liquid (47.7 mg, 96%). <sup>1</sup>H NMR (400 MHz, CDCl<sub>3</sub>) δ 7.83 – 7.75 (m, 2H), 7.36 (d, *J* = 8.0 Hz, 2H), 7.22 (t, *J* = 7.6 Hz, 1H), 7.12 (d, *J* = 8.1 Hz, 3H),

5.79 (t,  $J = 8.3$  Hz, 1H), 4.48 (s, 1H), 4.10 (d,  $J = 7.3$  Hz, 2H), 3.96 (d,  $J = 5.8$  Hz, 2H), 2.46 (s, 3H), 2.34 (s, 3H), 1.37 (s, 9H).  $^{13}\text{C}$  NMR (100 MHz,  $\text{CDCl}_3$ )  $\delta$  155.7, 145.8, 145.1, 139.3, 138.3, 130.0, 129.3, 128.6, 128.6, 127.5, 123.7, 116.1, 79.6, 56.3, 39.0, 28.5, 21.8, 21.6. HRMS(ESI): calcd for  $\text{C}_{23}\text{H}_{29}\text{NNaO}_4\text{S}^+$   $[\text{M}+\text{Na}]^+$ : 438.1706; Found: 438.1710.

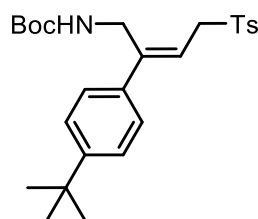

**3d**

(**3d**): Light yellow liquid (51.0 mg, 93%).  $^1\text{H}$  NMR (400 MHz,  $\text{CDCl}_3$ )  $\delta$  7.79 (d,  $J = 8.3$  Hz, 2H), 7.36 (dd,  $J = 8.3, 3.3$  Hz, 4H), 7.27 (d,  $J = 8.2$  Hz, 2H), 5.79 (t,  $J = 8.2$  Hz, 1H), 4.51 (s, 1H), 4.10 (d,  $J = 8.8$  Hz, 2H), 3.96 (d,  $J = 5.8$  Hz, 2H), 2.46 (s, 3H), 1.37 (s, 9H), 1.31 (s, 9H).  $^{13}\text{C}$  NMR (100 MHz,  $\text{CDCl}_3$ )  $\delta$  155.8, 151.7, 145.4, 145.1, 136.3, 135.9, 130.0, 128.6, 126.3, 125.6, 115.6, 79.6, 56.3, 38.9, 34.7, 31.4, 28.5, 21.8. HRMS(ESI): calcd for  $\text{C}_{26}\text{H}_{36}\text{NO}_4\text{S}^+$   $[\text{M}+\text{H}]^+$ : 458.2358; Found: 458.2360.

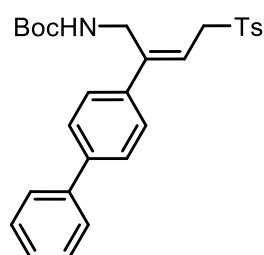

**3e**

(**3e**): Light yellow solid (52.2 mg, 91%). Mp = 156.2-157.5 °C.  $^1\text{H}$  NMR (400 MHz,  $\text{CDCl}_3$ )  $\delta$  7.81 (d,  $J = 8.3$  Hz, 2H), 7.58 (dd,  $J = 7.9, 6.2$  Hz, 4H), 7.49 – 7.32 (m, 7H), 5.87 (t,  $J = 8.3$  Hz, 1H), 4.55 (s, 1H), 4.13 (d,  $J = 8.4$  Hz, 2H), 4.03 (d,  $J = 5.7$  Hz, 2H), 2.47 (s, 3H), 1.38 (s, 9H).  $^{13}\text{C}$  NMR (100 MHz,  $\text{CDCl}_3$ )  $\delta$  155.8, 145.3, 145.2, 141.3, 140.5, 138.1, 136.0, 130.0, 129.0, 128.6, 127.7, 127.4, 127.1, 127.1, 116.2, 79.7, 56.3, 38.9, 28.5, 21.8. HRMS(ESI): calcd for  $\text{C}_{28}\text{H}_{31}\text{NNaO}_4\text{S}^+$   $[\text{M}+\text{Na}]^+$ :

500.1872; Found: 500.1866.

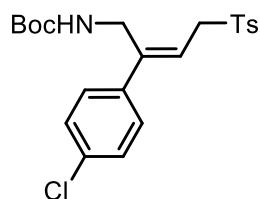

**3f**

(**3f**): Light yellow liquid (41.7 mg, 80%).  $^1\text{H NMR}$  (400 MHz,  $\text{CDCl}_3$ )  $\delta$  7.84 – 7.73 (m, 2H), 7.37 (d,  $J = 8.1$  Hz, 2H), 7.33 – 7.27 (m, 4H), 5.77 (t,  $J = 8.3$  Hz, 1H), 4.50 (s, 1H), 4.08 (d,  $J = 8.3$  Hz, 2H), 3.99 (d,  $J = 5.8$  Hz, 2H), 2.46 (s, 3H), 1.37 (s, 9H).  $^{13}\text{C NMR}$  (100 MHz,  $\text{CDCl}_3$ )  $\delta$  155.7, 145.3, 145.0, 137.7, 135.9, 134.5, 130.1, 128.9, 128.6, 128.0, 116.6, 79.8, 56.1, 38.9, 28.4, 21.8. HRMS(ESI): calcd for  $\text{C}_{22}\text{H}_{26}\text{ClNNaO}_4\text{S}^+$   $[\text{M}+\text{Na}]^+$ : 458.1158, 460.1134; Found: 458.1163, 460.1141.

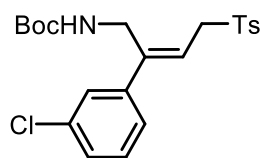

**3g**

(**3g**): Light yellow liquid (49.5 mg, 95%).  $^1\text{H NMR}$  (400 MHz,  $\text{CDCl}_3$ )  $\delta$  7.79 (d,  $J = 8.4$  Hz, 2H), 7.38 (d,  $J = 8.0$  Hz, 2H), 7.31 – 7.16 (m, 4H), 5.77 (t,  $J = 8.3$  Hz, 1H), 4.54 (s, 1H), 4.09 (d,  $J = 7.2$  Hz, 2H), 3.98 (d,  $J = 5.9$  Hz, 2H), 2.46 (s, 3H), 1.37 (s, 9H).  $^{13}\text{C NMR}$  (100 MHz,  $\text{CDCl}_3$ )  $\delta$  155.7, 145.3, 144.9, 141.3, 135.9, 134.6, 130.1, 129.9, 128.6, 128.5, 127.0, 124.9, 117.3, 79.8, 56.1, 38.94, 28.4, 21.8. HRMS(ESI): calcd for  $\text{C}_{22}\text{H}_{26}\text{ClNNaO}_4\text{S}^+$   $[\text{M}+\text{Na}]^+$ : 458.1165, 460.1142; Found: 458.1163, 460.1141.

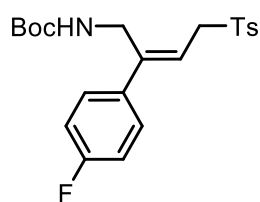

**3h**

(**3h**): Light yellow liquid (44.4 mg, 88%).  $^1\text{H NMR}$  (400 MHz,  $\text{CDCl}_3$ )  $\delta$  7.85 – 7.74

(m, 2H), 7.37 (d,  $J = 8.1$  Hz, 2H), 7.31 (dd,  $J = 8.6, 5.3$  Hz, 2H), 7.09 – 6.93 (m, 2H), 5.73 (t,  $J = 8.3$  Hz, 1H), 4.52 (s, 1H), 4.08 (d,  $J = 8.3$  Hz, 2H), 3.99 (d,  $J = 5.9$  Hz, 2H), 2.46 (s, 3H), 1.37 (s, 9H).  $^{13}\text{C}$  NMR (100 MHz,  $\text{CDCl}_3$ )  $\delta$  162.9 (d,  $J = 247.9$  Hz), 155.8, 145.2 (d,  $J = 12.9$  Hz), 136.0, 135.4, 130.1, 128.6, 128.5 (d,  $J = 8.2$  Hz), 116.1, 115.6 (d,  $J = 21.5$  Hz), 79.7, 56.2, 39.0, 28.4, 21.8.  $^{19}\text{F}$  NMR (376 MHz,  $\text{CDCl}_3$ )  $\delta$  -113.5. HRMS(ESI): calcd for  $\text{C}_{22}\text{H}_{26}\text{FNNaO}_4\text{S}^+$   $[\text{M}+\text{Na}]^+$ : 442.1459; Found: 442.1459.

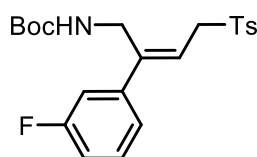

**3i**

**(3i)**: Light yellow liquid (42.3 mg, 84%).  $^1\text{H}$  NMR (400 MHz,  $\text{CDCl}_3$ )  $\delta$  7.86 – 7.74 (m, 2H), 7.38 (d,  $J = 8.0$  Hz, 2H), 7.30 (td,  $J = 8.0, 6.0$  Hz, 1H), 7.16 – 7.08 (m, 1H), 7.06 – 6.95 (m, 2H), 5.80 (t,  $J = 8.3$  Hz, 1H), 4.54 (s, 1H), 4.10 (d,  $J = 8.3$  Hz, 2H), 3.98 (d,  $J = 5.9$  Hz, 2H), 2.47 (s, 3H), 1.37 (s, 9H).  $^{13}\text{C}$  NMR (100 MHz,  $\text{CDCl}_3$ )  $\delta$  163.0 (d,  $J = 246.2$  Hz), 155.7, 145.3, 145.0, 141.7 (d,  $J = 7.5$  Hz), 135.9, 130.2 (d,  $J = 8.4$  Hz), 130.1, 128.6, 122.4, 117.3, 115.4 (d,  $J = 21.2$  Hz), 113.8 (d,  $J = 22.3$  Hz), 79.8, 56.1, 39.0, 28.4, 21.8.  $^{19}\text{F}$  NMR (376 MHz,  $\text{CDCl}_3$ )  $\delta$  -112.7. HRMS(ESI): calcd for  $\text{C}_{22}\text{H}_{26}\text{FNNaO}_4\text{S}^+$   $[\text{M}+\text{Na}]^+$ : 442.1453; Found: 442.1459.

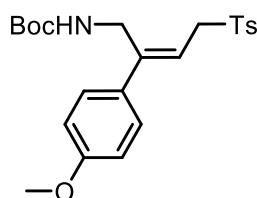

**3j**

**(3j)**: Light yellow liquid (42.0 mg, 81%).  $^1\text{H}$  NMR (400 MHz,  $\text{CDCl}_3$ )  $\delta$  7.85 – 7.74 (m, 2H), 7.36 (d,  $J = 8.1$  Hz, 2H), 7.28 (d,  $J = 8.5$  Hz, 2H), 6.91 – 6.82 (m, 2H), 5.73 (t,  $J = 8.3$  Hz, 1H), 4.49 (s, 1H), 4.08 (d,  $J = 8.4$  Hz, 2H), 3.96 (d,  $J = 5.7$  Hz, 2H), 3.81 (s, 3H), 2.46 (s, 3H), 1.37 (s, 9H).  $^{13}\text{C}$  NMR (100 MHz,  $\text{CDCl}_3$ )  $\delta$  159.9, 155.8, 145.1, 136.0, 131.6, 130.0, 128.6, 127.9, 114.5, 114.1, 79.6, 56.3, 55.4, 38.8, 28.5,

21.8. HRMS(ESI): calcd for  $C_{23}H_{30}NO_5S^+$   $[M+H]^+$ : 432.1836; Found: 432.1839.

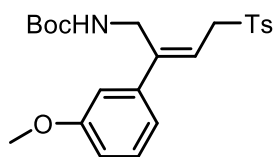

**3k**

(**3k**): Light yellow liquid (48.6 mg, 94%).  $^1H$  NMR (400 MHz,  $CDCl_3$ )  $\delta$  7.79 (d,  $J = 8.3$  Hz, 2H), 7.36 (d,  $J = 8.0$  Hz, 2H), 7.23 (d,  $J = 7.7$  Hz, 1H), 6.91 (d,  $J = 8.0$  Hz, 1H), 6.88 – 6.82 (m, 2H), 5.80 (t,  $J = 8.3$  Hz, 1H), 4.52 (s, 1H), 4.10 (d,  $J = 6.8$  Hz, 2H), 3.96 (d,  $J = 5.8$  Hz, 2H), 3.81 (s, 3H), 2.46 (s, 3H), 1.37 (s, 9H).  $^{13}C$  NMR (100 MHz,  $CDCl_3$ )  $\delta$  159.8, 155.7, 145.7, 145.2, 140.8, 135.9, 130.0, 129.7, 128.6, 119.0, 116.4, 114.1, 112.3, 79.6, 56.2, 55.4, 39.0, 28.5, 21.8. HRMS(ESI): calcd for  $C_{23}H_{29}NNaO_5S^+$   $[M+Na]^+$ : 454.1659; Found: 454.1659.

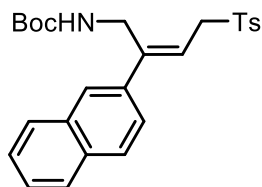

**3l**

(**3l**): Light yellow liquid (42.3 mg, 78%).  $^1H$  NMR (400 MHz,  $CDCl_3$ )  $\delta$  7.94 – 7.71 (m, 6H), 7.54 – 7.43 (m, 3H), 7.37 (d,  $J = 8.0$  Hz, 2H), 5.96 (t,  $J = 8.2$  Hz, 1H), 4.53 (s, 1H), 4.20 – 4.07 (m, 4H), 2.46 (s, 3H), 1.36 (s, 9H).  $^{13}C$  NMR (100 MHz,  $CDCl_3$ )  $\delta$  155.8, 145.7, 145.2, 136.4, 135.9, 133.4, 133.2, 130.0, 128.7, 128.43, 128.37, 127.7, 126.59, 126.57, 126.0, 124.4, 116.6, 79.7, 56.4, 38.9, 28.4, 21.8. HRMS(ESI): calcd for  $C_{26}H_{30}NO_4S^+$   $[M+H]^+$ : 452.1886; Found: 452.1890.

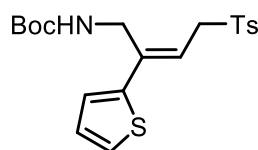

**3m**

(**3m**): Yellow liquid (44.1 mg, 90%).  $^1H$  NMR (400 MHz,  $CDCl_3$ )  $\delta$  7.78 (d,  $J = 8.0$



Hz, 2H), 7.36 (d,  $J = 8.0$  Hz, 2H), 7.24 – 7.16 (m, 2H), 6.99 (dd,  $J = 5.1, 3.6$  Hz, 1H), 5.86 (t,  $J = 8.3$  Hz, 1H), 4.85 (s, 1H), 4.20 – 4.07 (m, 4H), 2.46 (s, 3H), 1.41 (s, 9H).  $^{13}\text{C}$  NMR (100 MHz,  $\text{CDCl}_3$ )  $\delta$  155.8, 145.2, 143.1, 139.5, 135.9, 130.1, 128.6, 128.0, 125.7, 125.5, 114.2, 79.8, 56.2, 38.9, 28.5, 21.8. HRMS(ESI): calcd for  $\text{C}_{20}\text{H}_{25}\text{NNaO}_4\text{S}_2^+$  [ $\text{M}+\text{Na}$ ] $^+$ : 430.1116; Found: 430.1117.

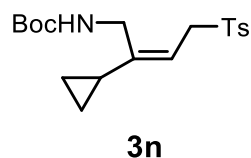

**(3n)**: Colorless liquid (24.6 mg, 56%).  $^1\text{H}$  NMR (400 MHz,  $\text{CDCl}_3$ )  $\delta$  7.73 (d,  $J = 8.2$  Hz, 2H), 7.35 (d,  $J = 8.0$  Hz, 2H), 5.17 (t,  $J = 8.3$  Hz, 1H), 4.72 (s, 1H), 3.86 (d,  $J = 8.2$  Hz, 2H), 3.57 (d,  $J = 5.9$  Hz, 2H), 2.46 (s, 3H), 1.43 (s, 9H), 1.31 – 1.21 (m, 1H), 0.75 – 0.62 (m, 2H), 0.51 – 0.37 (m, 2H).  $^{13}\text{C}$  NMR (100 MHz,  $\text{CDCl}_3$ )  $\delta$  159.3, 148.6, 145.0, 136.0, 129.9, 128.6, 110.8, 79.6, 55.5, 39.8, 28.6, 21.8, 16.1, 6.2. HRMS(ESI): calcd for  $\text{C}_{19}\text{H}_{28}\text{NO}_4\text{S}^+$  [ $\text{M}+\text{H}$ ] $^+$ : 366.1731; Found: 366.1734.

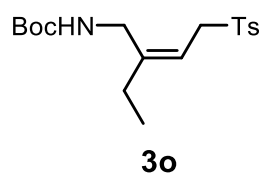

**(3o)**: Light yellow liquid (36.1 mg, 51.1%).  $^1\text{H}$  NMR (400 MHz,  $\text{CDCl}_3$ )  $\delta$  7.71 (d,  $J = 8.3$  Hz, 2H), 7.32 (d,  $J = 8.2$  Hz, 2H), 5.22 (t,  $J = 8.1$  Hz, 1H), 4.70 (s, 1H), 3.85 (d,  $J = 8.2$  Hz, 2H), 3.53 (d,  $J = 6.1$  Hz, 2H), 2.41 (s, 3H), 2.24 – 1.96 (m, 2H), 1.39 (s, 9H), 0.96 (t,  $J = 7.4$  Hz, 3H).  $^{13}\text{C}$  NMR (100 MHz,  $\text{CDCl}_3$ )  $\delta$  156.1, 149.2, 145.0, 135.8, 129.8, 128.5, 112.0, 79.4, 55.4, 39.4, 28.4, 21.7, 12.3. HRMS(ESI): calcd for  $\text{C}_{18}\text{H}_{28}\text{NO}_4\text{S}^+$  [ $\text{M}+\text{H}$ ] $^+$ : 354.1718; Found: 354.1734.

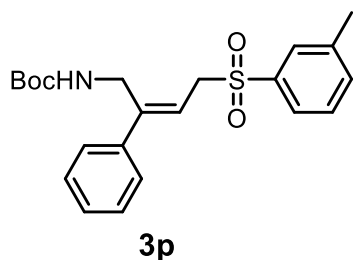

**(3p):** White crystal (42.9 mg, 89%). Mp = 82.1-83.6 °C. <sup>1</sup>H NMR (400 MHz, CDCl<sub>3</sub>) δ 7.81 – 7.65 (m, 2H), 7.51 – 7.42 (m, 2H), 7.35 – 7.31 (m, 5H), 5.80 (t, *J* = 8.3 Hz, 1H), 4.49 (s, 1H), 4.11 (d, *J* = 8.3 Hz, 2H), 3.97 (d, *J* = 5.9 Hz, 2H), 2.44 (s, 3H), 1.36 (s, 9H). <sup>13</sup>C NMR (100 MHz, CDCl<sub>3</sub>) δ 155.8, 146.0, 139.7, 139.4, 138.7, 134.9, 129.3, 128.9, 128.7, 128.5, 126.7, 125.7, 116.2, 79.6, 56.2, 38.9, 28.4, 21.4. HRMS(ESI): calcd for C<sub>22</sub>H<sub>28</sub>NO<sub>4</sub>S<sup>+</sup> [M+H]<sup>+</sup>: 402.1720; Found: 402.1734.

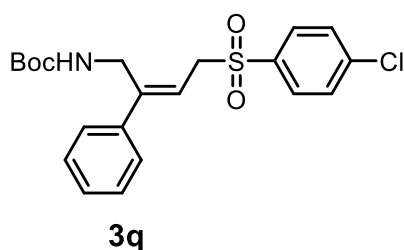

**(3q):** White solid (47.1 mg, 93%). Mp = 108.4-109.3 °C. <sup>1</sup>H NMR (400 MHz, CDCl<sub>3</sub>) δ 7.94 – 7.79 (m, 2H), 7.55 (dd, *J* = 8.8, 2.2 Hz, 2H), 7.40 – 7.27 (m, 5H), 5.78 (t, *J* = 8.3 Hz, 1H), 4.58 (s, 1H), 4.16 (d, *J* = 8.2 Hz, 2H), 4.00 (d, *J* = 5.8 Hz, 2H), 1.37 (s, 9H). <sup>13</sup>C NMR (100 MHz, CDCl<sub>3</sub>) δ 155.7, 146.3, 140.9, 139.2, 137.3, 130.1, 129.8, 129.7, 128.8, 128.7, 126.7, 115.7, 79.8, 56.3, 39.0, 28.4. HRMS(ESI): calcd for C<sub>21</sub>H<sub>24</sub>ClNNaO<sub>4</sub>S<sup>+</sup> [M+Na]<sup>+</sup>: 444.1015, 446.0993; Found: 444.1007, 446.0984.

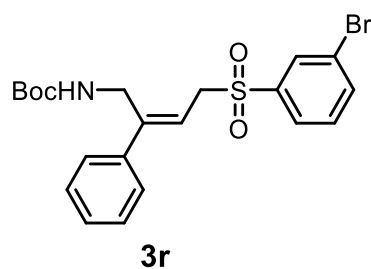

**(3r):** White solid (53.1 mg, 95%). Mp = 109.2-110.7 °C. <sup>1</sup>H NMR (400 MHz, CDCl<sub>3</sub>)

$\delta$  8.06 (d,  $J = 1.9$  Hz, 1H), 7.94 – 7.73 (m, 2H), 7.47 (t,  $J = 7.9$  Hz, 1H), 7.38 – 7.30 (m, 5H), 5.77 (t,  $J = 8.2$  Hz, 1H), 4.58 (s, 1H), 4.16 (d,  $J = 8.2$  Hz, 2H), 3.98 (d,  $J = 5.8$  Hz, 2H), 1.37 (s, 9H).  $^{13}\text{C}$  NMR (100 MHz,  $\text{CDCl}_3$ )  $\delta$  155.7, 146.6, 140.7, 139.2, 137.2, 131.6, 131.0, 128.8, 128.7, 127.1, 126.8, 123.4, 115.5, 79.8, 56.3, 39.0, 28.4. HRMS(ESI): calcd for  $\text{C}_{21}\text{H}_{24}\text{BrNNaO}_4\text{S}^+$   $[\text{M}+\text{Na}]^+$ : 466.0692, 468.0672; Found: 466.0682, 468.0664.

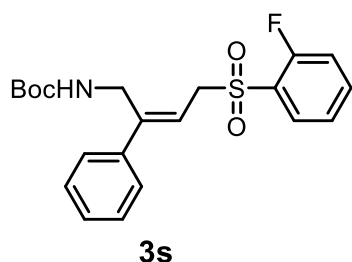

(**3s**): Light yellow liquid (44.7 mg, 92%).  $^1\text{H}$  NMR (400 MHz,  $\text{CDCl}_3$ )  $\delta$  7.86 (td,  $J = 7.4, 1.8$  Hz, 1H), 7.60 (qd,  $J = 7.4, 1.8$  Hz, 1H), 7.34 – 7.16 (m, 7H), 5.73 (t,  $J = 8.2$  Hz, 1H), 4.60 (s, 1H), 4.27 (d,  $J = 8.2$  Hz, 2H), 4.08 (d,  $J = 5.9$  Hz, 2H), 1.30 (s, 9H).  $^{13}\text{C}$  NMR (100 MHz,  $\text{CDCl}_3$ )  $\delta$  161.0, 157.1 (d,  $J = 270.9$  Hz), 146.8, 139.3, 136.6 (d,  $J = 8.4$  Hz), 131.1, 128.6 (d,  $J = 12.5$  Hz), 126.8, 125.0 (d,  $J = 3.8$  Hz), 117.4 (d,  $J = 21.2$  Hz), 115.0, 79.6, 55.5, 39.2, 28.4.  $^{19}\text{F}$  NMR (376 MHz,  $\text{CDCl}_3$ )  $\delta$  -108.4. HRMS(ESI): calcd for  $\text{C}_{21}\text{H}_{25}\text{FNO}_4\text{S}^+$   $[\text{M}+\text{H}]^+$ : 406.1480; Found: 406.1483.

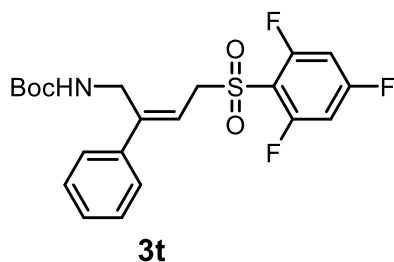

(**3t**): White solid (48.6 mg, 92%). Mp = 62.1-63.3 °C.  $^1\text{H}$  NMR (400 MHz,  $\text{CDCl}_3$ )  $\delta$  7.80 (td,  $J = 8.6, 6.1$  Hz, 1H), 7.42 – 7.29 (m, 5H), 7.16 (td,  $J = 9.1, 5.8$  Hz, 1H), 5.79 (t,  $J = 8.1$  Hz, 1H), 4.66 (s, 1H), 4.37 (d,  $J = 8.2$  Hz, 2H), 4.17 (d,  $J = 5.8$  Hz, 2H), 1.37 (s, 9H).  $^{13}\text{C}$  NMR (100 MHz,  $\text{CDCl}_3$ )  $\delta$  171.2, 155.5 (dd,  $J = 255.8, 10.9, 9.5$  Hz), 155.7, 152.9 (dt, 259.3, 14.2, 13.2 Hz), 146.7 (dd,  $J = 239.1$  Hz), 147.3, 139.1,

128.7, 128.60, 126.7, 123.6 (dd,  $J = 17.4$  Hz), 119.4 (dt,  $J = 21.8, 2.4$  Hz), 114.2, 107.8 (dd,  $J = 27.6, 21.8$  Hz), 79.6, 60.4, 55.7, 28.3.  $^{19}\text{F}$  NMR (376 MHz,  $\text{CDCl}_3$ )  $\delta$  -108.7 (dd,  $J = 16.0, 9.0$  Hz), -121.3 (dd,  $J = 20.8, 9.0$  Hz), -138.1 (dd,  $J = 20.8, 16.0$  Hz). HRMS(ESI): calcd for  $\text{C}_{21}\text{H}_{23}\text{F}_3\text{NO}_4\text{S}^+$   $[\text{M}+\text{H}]^+$ : 442.1296; Found: 442.1294.

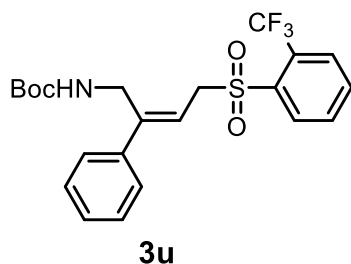

(**3u**): White solid (45.9 mg, 84%). Mp = 125.4-126.4 °C.  $^1\text{H}$  NMR (400 MHz,  $\text{CDCl}_3$ )  $\delta$  8.23 (d,  $J = 8.6$  Hz, 1H), 7.96 (d,  $J = 7.5$  Hz, 1H), 7.87 – 7.69 (m, 2H), 7.42 – 7.29 (m, 5H), 5.81 (t,  $J = 8.3$  Hz, 1H), 4.64 (s, 1H), 4.30 (d,  $J = 8.3$  Hz, 2H), 4.11 (d,  $J = 6.6$  Hz, 2H), 1.37 (s, 9H).  $^{13}\text{C}$  NMR (100 MHz,  $\text{CDCl}_3$ )  $\delta$  155.7, 146.9, 139.2, 137.8, 134.2, 133.5, 132.6, 129.2 (q,  $J = 33.1$  Hz), 128.64 (q,  $J = 12.0$  Hz), 128.62, 128.5, 126.7, 122.7 (q,  $J = 273.9$  Hz), 115.0, 79.5, 56.4, 39.1, 28.3.  $^{19}\text{F}$  NMR (376 MHz,  $\text{CDCl}_3$ )  $\delta$  -56.5. HRMS(ESI): calcd for  $\text{C}_{22}\text{H}_{25}\text{F}_3\text{NO}_4\text{S}^+$   $[\text{M}+\text{H}]^+$ : 456.1459; Found: 456.1451.

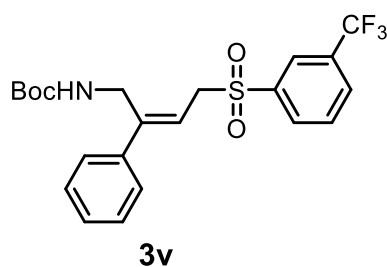

(**3v**): White solid (51.9 mg, 95%). Mp = 120.3-121.1 °C.  $^1\text{H}$  NMR (400 MHz,  $\text{CDCl}_3$ )  $\delta$  8.28 – 8.08 (m, 2H), 7.94 (d,  $J = 7.8$  Hz, 1H), 7.75 (t,  $J = 7.8$  Hz, 1H), 7.40 – 7.27 (m, 5H), 5.77 (t,  $J = 8.2$  Hz, 1H), 4.59 (s, 1H), 4.21 (d,  $J = 8.2$  Hz, 2H), 3.97 (d,  $J = 5.9$  Hz, 2H), 1.36 (s, 9H).  $^{13}\text{C}$  NMR (100 MHz,  $\text{CDCl}_3$ )  $\delta$  155.7, 146.7, 140.1, 139.1, 131.8, 132.0 (q,  $J = 33.4$  Hz), 130.8, 130.7 (q,  $J = 3.8$  Hz), 130.3, 128.7, 126.6, 125.7 (q,  $J = 4.0$  Hz), 123.1 (q,  $J = 273.1$  Hz), 115.3, 79.6, 56.1, 38.9, 28.3.  $^{19}\text{F}$  NMR (376

MHz, CDCl<sub>3</sub>) δ -62.7. HRMS(ESI): calcd for C<sub>22</sub>H<sub>25</sub>F<sub>3</sub>NO<sub>4</sub>S<sup>+</sup> [M+H]<sup>+</sup>: 456.1442;

Found: 456.1451.

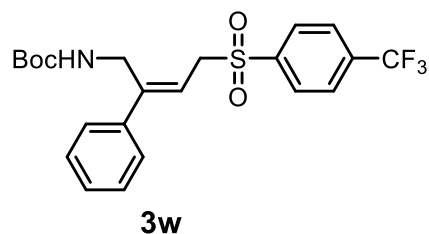

(**3w**): White solid (47.4 mg, 87%). Mp = 135.7-136.9 °C. <sup>1</sup>H NMR (400 MHz, CDCl<sub>3</sub>) δ 8.08 (d, *J* = 8.1 Hz, 2H), 7.85 (d, *J* = 8.1 Hz, 2H), 7.42 – 7.29 (m, 5H), 5.77 (t, *J* = 8.1 Hz, 1H), 4.63 (s, 1H), 4.22 (d, *J* = 8.1 Hz, 2H), 4.02 (d, *J* = 5.9 Hz, 2H), 1.37 (s, 9H). <sup>13</sup>C NMR (100 MHz, CDCl<sub>3</sub>) δ 155.7, 146.7, 142.5, 139.2, 135.6 (q, *J* = 33.1 Hz), 129.2, 128.9, 128.8, 128.7, 128.6, 126.6, 126.4 (q, *J* = 3.8 Hz), 123.2 (q, *J* = 273.2 Hz), 115.2, 79.7, 56.0, 39.0, 28.3. <sup>19</sup>F NMR (376 MHz, CDCl<sub>3</sub>) δ -63.1. HRMS(ESI): calcd for C<sub>22</sub>H<sub>25</sub>F<sub>3</sub>NO<sub>4</sub>S<sup>+</sup> [M+H]<sup>+</sup>: 456.1448; Found 456.1451.

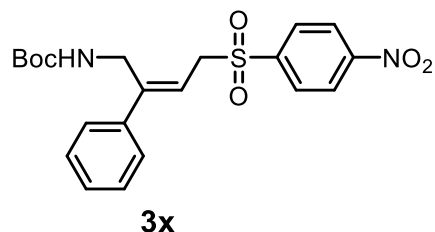

(**3x**): White solid (40.8 mg, 79%). Mp = 161.2-162.3 °C. <sup>1</sup>H NMR (400 MHz, CDCl<sub>3</sub>) δ 8.53 – 8.37 (m, 2H), 8.14 (d, *J* = 8.7 Hz, 2H), 7.41 – 7.27 (m, 5H), 5.77 (t, *J* = 8.1 Hz, 1H), 4.58 (s, 1H), 4.27 (d, *J* = 8.1 Hz, 2H), 4.00 (d, *J* = 5.9 Hz, 2H), 1.35 (s, 9H). <sup>13</sup>C NMR (100 MHz, CDCl<sub>3</sub>) δ 155.7, 151.1, 146.9, 144.6, 139.0, 130.1, 128.94, 128.85, 126.7, 124.5, 114.9, 80.0, 56.2, 39.1, 28.4. HRMS(ESI): calcd for C<sub>21</sub>H<sub>24</sub>N<sub>2</sub>NaO<sub>6</sub>S<sup>+</sup> [M+Na]<sup>+</sup>: 455.1244; Found: 455.1247.

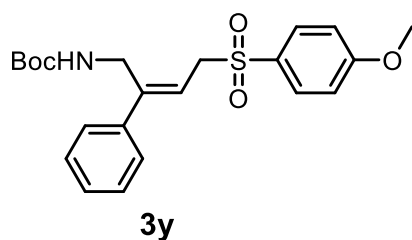

(**3y**): Yellow liquid (13.2 mg, 40%). <sup>1</sup>H NMR (400 MHz, CDCl<sub>3</sub>) δ 7.95 – 7.66 (m, 2H), 7.37 – 7.29 (m, 5H), 7.10 – 6.91 (m, 2H), 5.79 (t, *J* = 8.4 Hz, 1H), 4.57 (s, 1H), 4.10 (d, *J* = 8.3 Hz, 2H), 3.98 (d, *J* = 5.9 Hz, 2H), 3.88 (s, 3H), 1.36 (s, 9H). <sup>13</sup>C NMR (100 MHz, CDCl<sub>3</sub>) δ 164.1, 155.7, 145.7, 139.4, 130.7, 130.3, 128.7, 128.50, 126.6, 116.5, 114.5, 79.6, 56.4, 55.8, 38.9, 28.4. HRMS(ESI): calcd for C<sub>22</sub>H<sub>28</sub>NO<sub>5</sub>S<sup>+</sup> [M+H]<sup>+</sup>: 418.1675; Found: 418.1683.

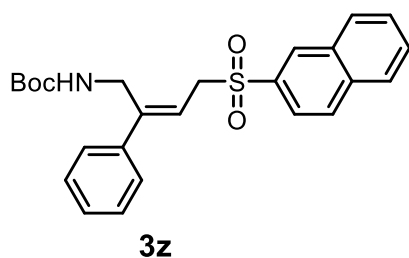

(**3z**): White solid (40.8 mg, 78%). Mp = 92.4-93.5 °C. <sup>1</sup>H NMR (400 MHz, CDCl<sub>3</sub>) δ 8.49 (s, 1H), 8.14 – 7.83 (m, 4H), 7.78 – 7.61 (m, 2H), 7.39 – 7.28 (m, 5H), 5.83 (t, *J* = 8.3 Hz, 1H), 4.56 (s, 1H), 4.22 (d, *J* = 8.2 Hz, 2H), 3.97 (d, *J* = 5.8 Hz, 2H), 1.34 (s, 9H). <sup>13</sup>C NMR (100 MHz, CDCl<sub>3</sub>) δ 155.7, 146.1, 139.3, 135.7, 135.5, 132.2, 130.5, 129.64, 129.56, 129.5, 128.7, 128.5, 128.2, 128.0, 126.7, 123.0, 116.1, 79.6, 56.3, 39.0, 28.4. HRMS(ESI): calcd for C<sub>25</sub>H<sub>28</sub>NO<sub>4</sub>S<sup>+</sup> [M+H]<sup>+</sup>: 438.1730; Found: 438.1734.

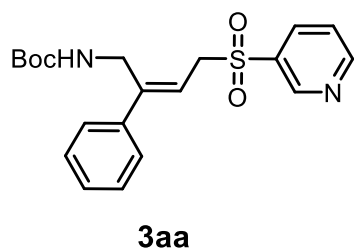

**(3aa)**: White solid (14.4 mg, 31%). Mp =124.3-125.7 °C. <sup>1</sup>H NMR (400 MHz, CDCl<sub>3</sub>) δ 9.11 (s, 1H), 8.89 (d, *J* = 4.9 Hz, 1H), 8.22 (d, *J* = 10.1 Hz, 1H), 7.53 (dd, *J* = 8.0, 4.9 Hz, 1H), 7.49 – 7.23 (m, 5H), 5.78 (t, *J* = 8.1 Hz, 1H), 4.63 (s, 1H), 4.23 (d, *J* = 8.3 Hz, 2H), 3.97 (d, *J* = 6.0 Hz, 2H), 1.36 (s, 7H). <sup>13</sup>C NMR (100 MHz, CDCl<sub>3</sub>) δ 154.6, 149.6, 146.8, 139.2, 136.4, 135.4, 128.9, 128.7, 126.7, 124.0, 115.2, 79.8, 56.6, 39.1, 28.4. HRMS(ESI): calcd for C<sub>20</sub>H<sub>25</sub>N<sub>2</sub>O<sub>4</sub>S<sup>+</sup> [M+H]<sup>+</sup>: 389.1531; Found: 389.1530.

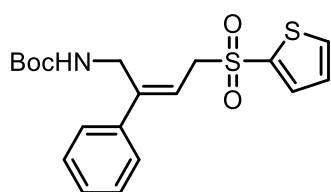

**3ab**

**(3ab)**: Colorless liquid (39.6 mg, 84%). <sup>1</sup>H NMR (400 MHz, CDCl<sub>3</sub>) δ 7.75 (dd, *J* = 4.9, 1.3 Hz, 1H), 7.70 (dd, *J* = 3.8, 1.3 Hz, 1H), 7.34 (d, *J* = 6.9 Hz, 5H), 7.21 – 7.14 (m, 1H), 5.85 (t, *J* = 8.2 Hz, 1H), 4.53 (s, 1H), 4.24 (d, *J* = 8.3 Hz, 2H), 4.02 (d, *J* = 5.8 Hz, 2H), 1.37 (s, 9H). <sup>13</sup>C NMR (100 MHz, CDCl<sub>3</sub>) δ 155.7, 146.4, 139.6, 139.2, 134.8, 134.7, 128.8, 128.6, 128.2, 126.7, 117.1, 79.7, 57.4, 38.9, 28.4. HRMS(ESI): calcd for C<sub>19</sub>H<sub>24</sub>NO<sub>4</sub>S<sub>2</sub><sup>+</sup> [M+H]<sup>+</sup>: 394.1133; Found: 394.1141.

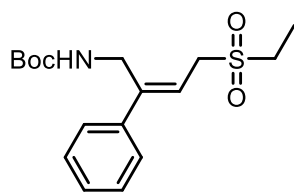

**3ac**

**(3ac)**: Light yellow liquid (29.7 mg, 73%). <sup>1</sup>H NMR (400 MHz, CDCl<sub>3</sub>) δ 7.50 – 7.31 (m, 5H), 5.91 (t, *J* = 8.1 Hz, 1H), 4.85 (s, 1H), 4.25 (d, *J* = 6.0 Hz, 2H), 4.08 (d, *J* = 8.1 Hz, 2H), 3.06 (q, *J* = 7.5 Hz, 2H), 1.47 – 1.35 (m, 12H). <sup>13</sup>C NMR (100 MHz, CDCl<sub>3</sub>) δ 147.1, 145.2, 139.1, 129.3, 128.8, 127.6, 116.0, 79.7, 56.4, 39.0, 29.8, 28.4, 14.3. HRMS(ESI): calcd for C<sub>17</sub>H<sub>26</sub>NO<sub>4</sub>S<sup>+</sup> [M+H]<sup>+</sup>: 340.1577; Found: 340.1577.

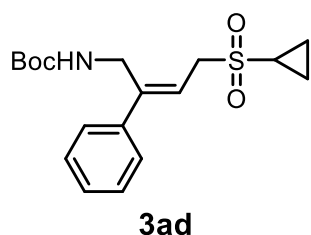

**(3ad)**: White solid (29.4 mg, 70%). Mp = 98.1-99.9 °C. <sup>1</sup>H NMR (400 MHz, CDCl<sub>3</sub>) δ 7.45 – 7.30 (m, 5H), 5.96 (t, *J* = 8.2 Hz, 1H), 4.83 (s, 1H), 4.27 (d, *J* = 5.9 Hz, 2H), 4.12 (d, *J* = 8.2 Hz, 2H), 2.47 (td, *J* = 8.0, 4.0 Hz, 1H), 1.38 (s, 9H), 1.29 (dt, *J* = 6.4, 3.0 Hz, 2H), 1.11 – 1.01 (m, 2H). <sup>13</sup>C NMR (100 MHz, CDCl<sub>3</sub>) δ 155.8, 145.6, 139.5, 128.8, 128.6, 126.8, 116.1, 79.8, 53.9, 39.3, 29.5, 28.5, 5.0. HRMS(ESI): calcd for C<sub>18</sub>H<sub>26</sub>NO<sub>4</sub>S<sup>+</sup> [M+H]<sup>+</sup>: 352.1573; Found: 352.1577.

## 5. Synthetic transformations of 3a

### 5.1. Reductive desulfonation of 3a.

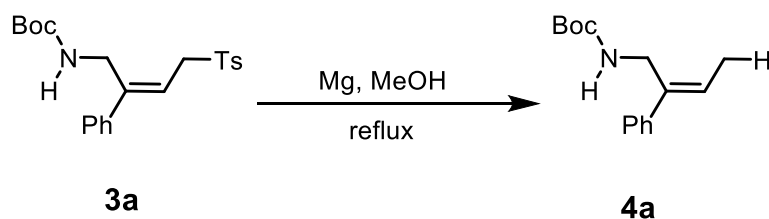

To a solution of 3a (120.3 mg, 0.30 mmol) in MeOH (3 mL) was added Magnesium turnings (72.9 mg, 3.00 mmol) at room temperature under air. The mixture was heated at 90 °C and refluxed overnight. The solvent was removed under reduced pressure and the residue was purified by flash chromatography on silica gel (Petroleum ether/EtOAc= 10:1) to give **4a**.

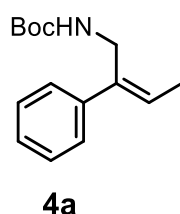

**(4a)**: White solid (45.1 mg, 61%). Mp = 39.1-40.7 °C. <sup>1</sup>H NMR (400 MHz, CDCl<sub>3</sub>) δ 7.45 – 7.15 (m, 5H), 5.97 (q, *J* = 7.0 Hz, 1H), 4.40 (s, 1H), 4.28 – 4.18 (m, 2H), 1.89 (d, *J* = 7.0 Hz, 3H), 1.41 (s, 9H). <sup>13</sup>C NMR (100 MHz, CDCl<sub>3</sub>) δ 155.9, 128.9, 128.6,



127.9, 127.2, 126.8, 126.3, 79.4, 38.9, 28.5, 14.3. HRMS calcd for  $C_{15}H_{22}NO_2^+$   
[M+H]<sup>+</sup>: 248.1644; Found 248.1645.

## 5.2. Selective hydrogenation of 3a

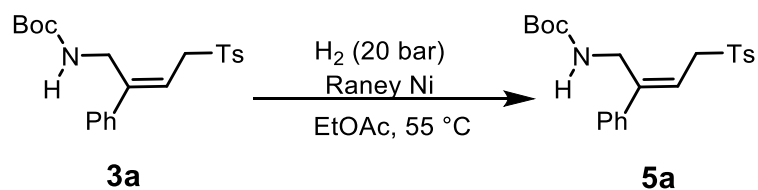

To a solution of 3a (120.3 mg, 0.30 mmol) in ethyl acetate (3 mL) was added Raney Ni at room temperature under air. The mixture was placed in an autoclave, pressurized to 20 bar of H<sub>2</sub>, and heated to 50 °C for 17 h. Then the solvent was removed under reduced pressure and the residue was purified by flash chromatography on silica gel (Petroleum ether/EtOAc= 2:1) to give desired products.

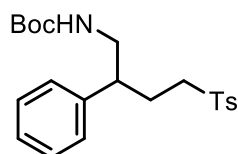

**5a**

(**5a**): White solid (26.1 mg, 64%). Mp = 102.4-103.5 °C. <sup>1</sup>H NMR (400 MHz, CDCl<sub>3</sub>) δ 7.72 – 7.57 (m, 2H), 7.33 – 7.11 (m, 5H), 7.06 – 6.93 (m, 2H), 4.37 (s, 1H), 3.43 – 3.00 (m, 2H), 2.89 (ddd, *J* = 13.9, 11.0, 5.4 Hz, 1H), 2.82 – 2.65 (m, 2H), 2.37 (s, 3H), 2.10 – 1.81 (m, 2H), 1.31 (s, 9H). <sup>13</sup>C NMR (100 MHz, CDCl<sub>3</sub>) δ 155.9, 144.8, 140.5, 136.1, 130.0, 129.1, 128.1, 127.8, 127.5, 79.5, 54.4, 46.2, 44.9, 28.4, 26.2, 21.7. HRMS calcd for C<sub>22</sub>H<sub>29</sub>NNaO<sub>4</sub>S<sup>+</sup> [M+Na]<sup>+</sup>: 426.1701; Found 426.1710.

## 6. Competition experiments

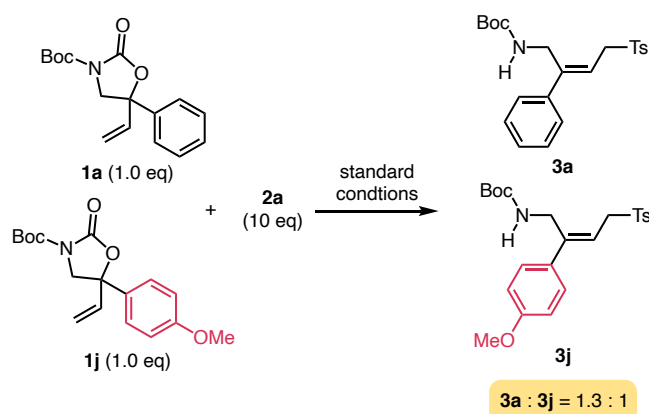

To a mixture of **1a** (34.7 mg, 0.12 mmol), **1e** (38.4 mg, 0.12 mmol), **2a** (213.9 mg, 1.20 mmol), Pd(OAc)<sub>2</sub> (1.3 mg, 0.006 mmol) and dpppe (5.3 mg, 0.012 mmol) was added THF (6 ml). The reaction allowed to heat at 50 °C for 12 h. The reaction was heated at 50 °C for 12 h. The reaction was cooled to room temperature and quenched with saturated aqueous NH<sub>4</sub>Cl solution (10 mL). The mixture was extracted with EtOAc, and the combined organic phases were washed with brine and dried over anhydrous Na<sub>2</sub>SO<sub>4</sub>. The solvent was removed under reduced pressure and the ratio of the products was analyzed by <sup>1</sup>H NMR. Further purification by flash chromatography on silica gel (Petroleum ether/EtOAc= 2:1) afforded product **3a** (40.8 mg) and **3j** (33.6 mg).

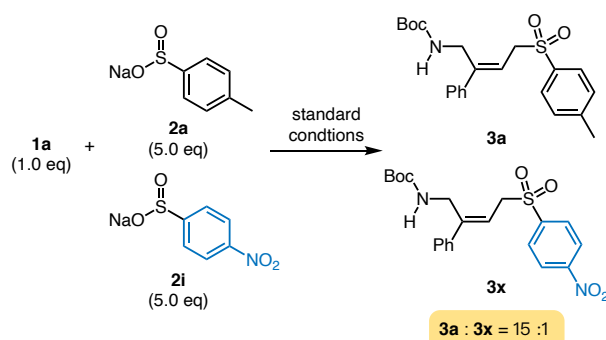

To a mixture of **1a** (34.7 mg, 0.12 mmol), **2a** (106.8 mg, 0.60 mmol), **2i** (125.4 mg, 0.60 mmol), Pd(OAc)<sub>2</sub> (1.3 mg, 0.006 mmol) and dppp (5.3 mg, 0.012 mmol) was added THF (6 ml). The reaction allowed to heat at 50 °C for 12 h. The reaction was

cooled to room temperature and quenched with saturated aqueous  $\text{NH}_4\text{Cl}$  solution (10 mL). The mixture was extracted with EtOAc, and the combined organic phases were washed with brine and dried over anhydrous  $\text{Na}_2\text{SO}_4$ . The solvent was removed under reduced pressure and the ratio of the products was analyzed by  $^1\text{H}$  NMR. Further purification by flash chromatography on silica gel (Petroleum ether/EtOAc= 2:1) afforded product **3a** (2.2 mg) and **3x** (40.1 mg).

## **7. Computational Details**

### **7.1 Computational Methods**

Density functional theory (DFT) calculations were performed using the Gaussian 16<sup>[2]</sup> and ORCA 5.0.3.<sup>[3]</sup> Geometries of intermediates and transition states were optimized using the dispersion-corrected B3LYP-D3(BJ)<sup>[4, 5]</sup> functional and the def2-svp basis set.<sup>[6]</sup> Vibrational frequency calculations and IRC calculations<sup>[7]</sup> at the same level of theory of the optimization were performed to confirm if each structure is a local minimum or a transition state. Single-point energy calculations were carried out using the B3LYP-D3(BJ) functional with the def2-tzvpp basis set. The CPCM solvation mode was employed with dichloroethane as solvent. A conformation search was performed by manually exchanging the coordinating groups on the metal center of the intermediates and transition states, and the structures were fully optimized using DFT. The structures were visualized using CYLview<sup>[8]</sup>.

## 7.2 Discussions on Reaction Pathways.

We examined three possible pathways using DFT calculations, as illustrated in **Figure S1**. The energetically favorable **Pathway A** is also depicted in **Scheme 5A** in the manuscript. The **Pathway B** represents the reaction mechanism in which the *cis-trans* isomerization transpires subsequent the generation of allyl-Pd intermediate and prior to the decarboxylation step. In the **Pathway C**, isomerization occurred prior to the formation of allyl-Pd species.

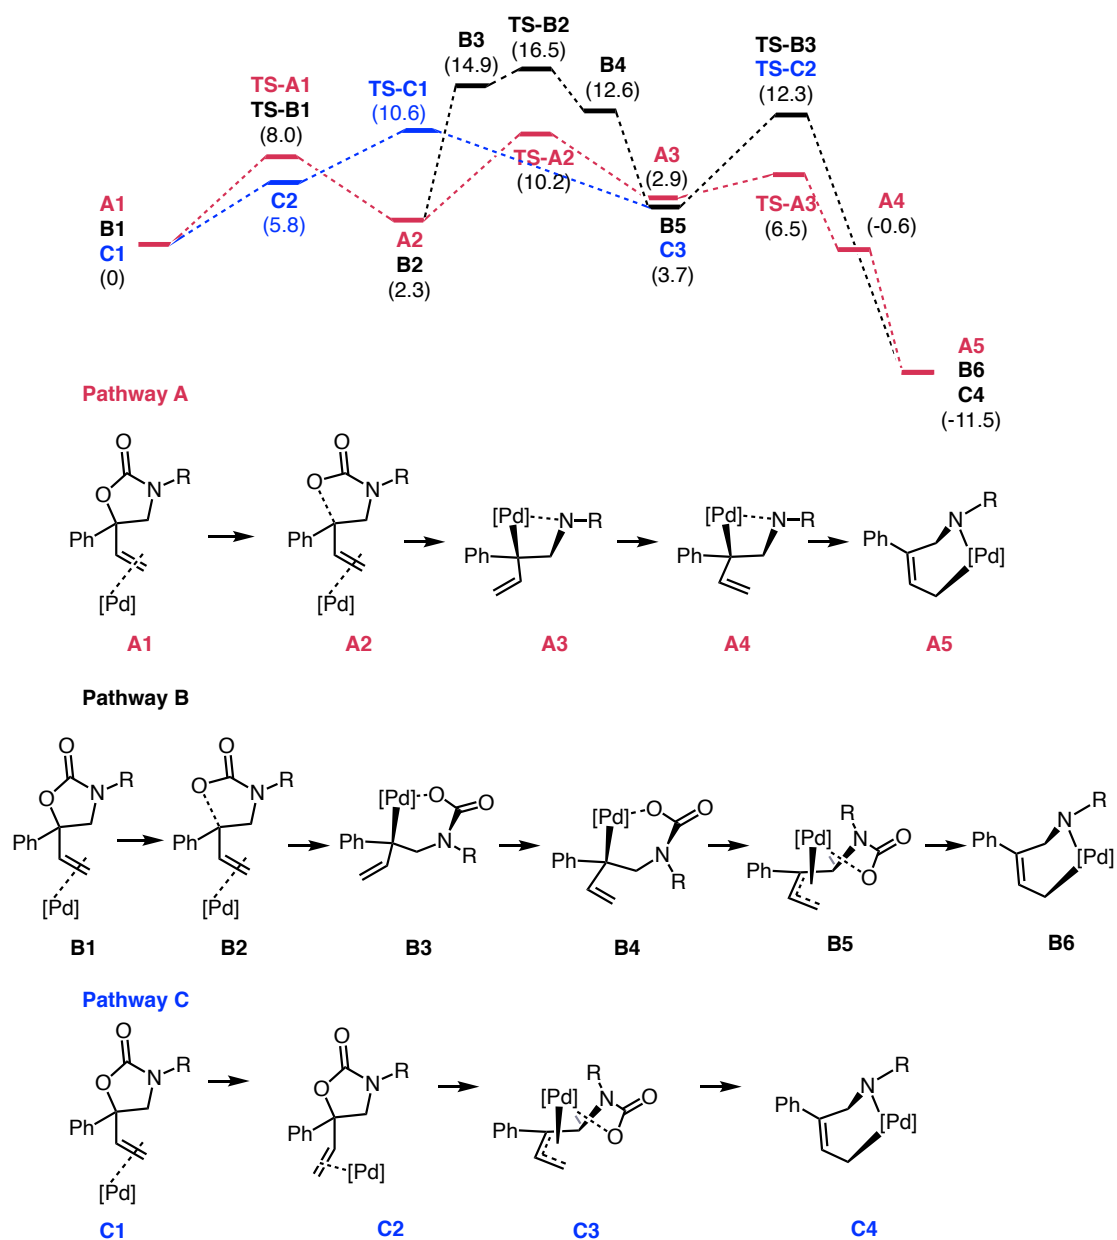

**Figure S1.** Energy diagram for the formation of A5.

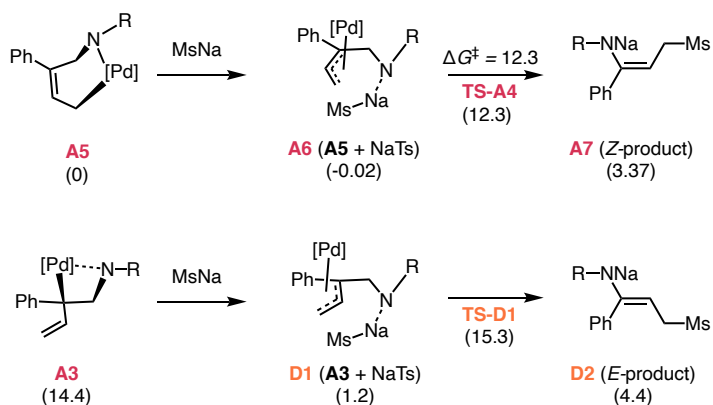

**Figure S2.** Energy Profiles for the substitution step.

### 9.3 Cartesian Coordinate of Calculated Structures

A1

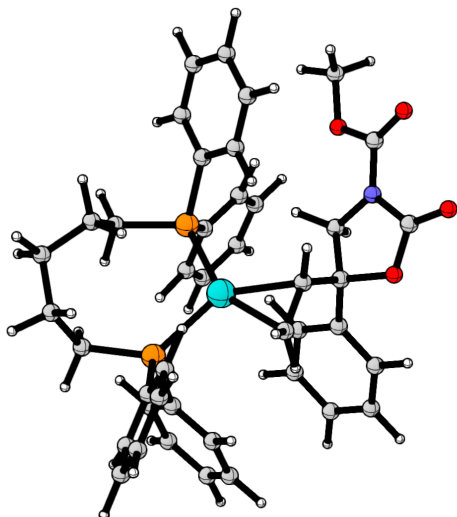

Energy: -2791.43045194

Zero point energy correction: 0.756214

Atom Coordinates:

|   |             |             |             |
|---|-------------|-------------|-------------|
| C | -3.96042900 | -0.95874600 | -1.40384900 |
| C | -3.46398400 | -1.39409500 | -2.64144300 |
| H | -2.39547000 | -1.59711900 | -2.74523000 |
| C | -4.32320100 | -1.56033200 | -3.73257000 |
| H | -3.92485400 | -1.90157400 | -4.69100200 |
| C | -5.68616200 | -1.28263700 | -3.59740300 |
| H | -6.35761100 | -1.40439700 | -4.45072400 |
| C | -6.18948100 | -0.84471500 | -2.36659000 |
| H | -7.25422400 | -0.62443700 | -2.25773700 |
| C | -5.33286600 | -0.68854500 | -1.27501200 |
| H | -5.73382000 | -0.34357000 | -0.31891600 |
| C | -3.39266700 | 0.67004900  | 0.91121200  |

|   |             |             |             |
|---|-------------|-------------|-------------|
| C | -3.68237900 | 1.83878300  | 0.18415600  |
| H | -3.62381900 | 1.82601500  | -0.90601100 |
| C | -4.04207500 | 3.01434400  | 0.84159800  |
| H | -4.26140600 | 3.91283700  | 0.26061700  |
| C | -4.10655600 | 3.04981700  | 2.23885900  |
| H | -4.38015400 | 3.97411800  | 2.75277200  |
| C | -3.80853000 | 1.89922800  | 2.97159200  |
| H | -3.85228900 | 1.91610300  | 4.06329200  |
| C | -3.45623500 | 0.71603500  | 2.31319900  |
| H | -3.23467900 | -0.17191200 | 2.90725000  |
| C | 2.27405100  | -2.36558300 | 0.37992200  |
| C | 3.08194900  | -3.14157100 | 1.22882600  |
| H | 2.82245300  | -3.24972500 | 2.28469100  |
| C | 4.22564800  | -3.77043700 | 0.73401300  |
| H | 4.84884400  | -4.36970500 | 1.40203300  |
| C | 4.57484000  | -3.63307600 | -0.61511000 |
| H | 5.47206800  | -4.12389200 | -0.99943100 |
| C | 3.77807800  | -2.86384600 | -1.46606400 |
| H | 4.04997500  | -2.74659300 | -2.51751500 |
| C | 2.63185900  | -2.23556600 | -0.96933500 |
| H | 2.00350100  | -1.63171300 | -1.62649700 |
| C | 1.28324800  | -0.55094600 | 2.41743800  |
| C | 2.61102400  | -0.12778800 | 2.59057000  |
| H | 3.39233900  | -0.48172700 | 1.91733200  |
| C | 2.94104600  | 0.77336700  | 3.60801300  |
| H | 3.97801200  | 1.09815000  | 3.72262900  |
| C | 1.95473800  | 1.26024100  | 4.46962100  |
| H | 2.21534600  | 1.96643600  | 5.26118400  |
| C | 0.62894700  | 0.84269200  | 4.30679000  |

|    |             |             |             |
|----|-------------|-------------|-------------|
| H  | -0.15303600 | 1.22264000  | 4.96846700  |
| C  | 0.29610700  | -0.04864200 | 3.28648400  |
| H  | -0.74990300 | -0.32876200 | 3.15007900  |
| P  | -2.79605500 | -0.82294500 | 0.01824500  |
| P  | 0.73644100  | -1.54689100 | 0.97154600  |
| Pd | -0.56644700 | -0.35529800 | -0.57064300 |
| C  | 2.63360100  | 1.44323200  | -0.49142600 |
| C  | 1.40904100  | 1.98384900  | -1.25871300 |
| H  | 2.93146900  | 2.10367300  | 0.33607400  |
| H  | 2.45081400  | 0.44290700  | -0.10012100 |
| C  | 0.59395500  | 0.87371000  | -1.89946500 |
| C  | -0.77701800 | 1.00161300  | -2.21962300 |
| H  | 1.21440100  | 0.23199300  | -2.53767800 |
| C  | 0.58384500  | 2.95084400  | -0.43839500 |
| C  | 0.17908600  | 4.18996400  | -0.94489900 |
| C  | 0.17964000  | 2.57447200  | 0.85085600  |
| C  | -0.61965600 | 5.04018500  | -0.17030200 |
| H  | 0.49187800  | 4.49007000  | -1.94526100 |
| C  | -0.61938200 | 3.41866400  | 1.62001700  |
| H  | 0.47772400  | 1.60761300  | 1.25280200  |
| C  | -1.02270900 | 4.65699200  | 1.11073300  |
| H  | -0.93009400 | 6.00604500  | -0.57644700 |
| H  | -0.93965900 | 3.09770600  | 2.61279300  |
| H  | -1.65718800 | 5.31537800  | 1.70817500  |
| C  | 3.30356900  | 2.27272400  | -2.58897400 |
| O  | 3.96441000  | 2.58553600  | -3.54161300 |
| H  | -1.32928100 | 1.89661900  | -1.92003700 |
| H  | -1.18144800 | 0.47806400  | -3.09018300 |
| C  | -3.45897000 | -2.20951600 | 1.08672200  |
| H  | -4.52357400 | -1.98070000 | 1.24791000  |
| H  | -2.98062500 | -2.15576600 | 2.07459100  |
| C  | -3.30454400 | -3.61894400 | 0.47584800  |
| H  | -4.23166700 | -4.17657100 | 0.68476100  |
| H  | -3.25547100 | -3.54387200 | -0.62409000 |
| C  | -0.19365800 | -2.94638500 | 1.74452500  |
| H  | -1.01424200 | -2.47055300 | 2.29678500  |
| H  | 0.42408200  | -3.46842600 | 2.49107900  |
| C  | -0.72805500 | -3.91271200 | 0.67250500  |
| H  | -0.00854100 | -4.73842000 | 0.56119600  |
| H  | -0.75457100 | -3.40499200 | -0.30837400 |
| C  | -2.12723400 | -4.47472800 | 0.96528300  |
| H  | -2.22171500 | -5.45933000 | 0.47801900  |
| H  | -2.22934000 | -4.66423200 | 2.04915400  |
| O  | 2.05723800  | 2.72475800  | -2.36061600 |

|   |            |             |             |
|---|------------|-------------|-------------|
| N | 3.65208800 | 1.42043000  | -1.53220900 |
| C | 4.86207800 | 0.75106100  | -1.41367100 |
| O | 5.71992800 | 0.67992300  | -2.25873500 |
| O | 4.93236100 | 0.18024400  | -0.19899700 |
| C | 6.12694000 | -0.55110700 | 0.08793900  |
| H | 6.98647800 | 0.13152700  | 0.15750100  |
| H | 5.95130200 | -1.04623600 | 1.04926000  |
| H | 6.31765600 | -1.30079300 | -0.69060500 |

#### TS-A1

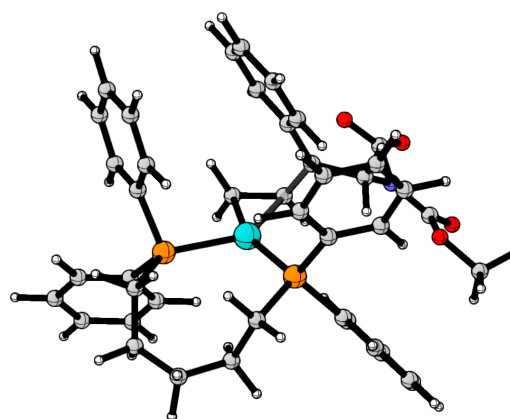

Energy: -2791.40851275

Zero point energy correction: 0.755104

Atom Coordinates:

|   |             |             |             |
|---|-------------|-------------|-------------|
| C | -3.73503700 | -1.37029900 | -1.23572800 |
| C | -3.04488600 | -2.00797000 | -2.27691600 |
| H | -1.95283000 | -2.03356900 | -2.25608100 |
| C | -3.74532400 | -2.60761800 | -3.32824000 |
| H | -3.19747400 | -3.10171700 | -4.13377000 |
| C | -5.14196500 | -2.57213400 | -3.34639700 |
| H | -5.69086400 | -3.03659300 | -4.16890500 |
| C | -5.83837400 | -1.94189100 | -2.30820700 |
| H | -6.93041400 | -1.91387700 | -2.31924800 |
| C | -5.14010400 | -1.34835700 | -1.25547000 |
| H | -5.69422000 | -0.85917600 | -0.45118300 |
| C | -3.46560300 | 1.01813000  | 0.42664200  |
| C | -4.12154800 | 1.72978300  | -0.58998200 |
| H | -4.31475900 | 1.25522600  | -1.55298400 |
| C | -4.52560000 | 3.05123900  | -0.37798200 |
| H | -5.03527500 | 3.59357400  | -1.17789700 |
| C | -4.27713400 | 3.67750900  | 0.84586800  |
| H | -4.58762500 | 4.71229600  | 1.00643200  |
| C | -3.61267600 | 2.97873300  | 1.85852000  |
| H | -3.39678600 | 3.46664500  | 2.81126700  |



|    |             |             |             |
|----|-------------|-------------|-------------|
| C  | -3.20432000 | 1.66073300  | 1.64982000  |
| H  | -2.66052300 | 1.13851000  | 2.44020900  |
| C  | 2.03167800  | -2.40280400 | 0.66656700  |
| C  | 2.84860200  | -3.17687600 | 1.50813800  |
| H  | 2.75451200  | -3.09241200 | 2.59347200  |
| C  | 3.78823000  | -4.05398000 | 0.96407700  |
| H  | 4.42036200  | -4.65144800 | 1.62508000  |
| C  | 3.91889400  | -4.16900800 | -0.42524400 |
| H  | 4.65602500  | -4.85479900 | -0.84917300 |
| C  | 3.11350600  | -3.39969900 | -1.26784600 |
| H  | 3.21869000  | -3.47822200 | -2.35211000 |
| C  | 2.17483100  | -2.51884600 | -0.72322000 |
| H  | 1.54269200  | -1.91438700 | -1.37722200 |
| C  | 1.60249100  | -0.23690700 | 2.55487900  |
| C  | 2.97307300  | 0.05002600  | 2.44425100  |
| H  | 3.57808100  | -0.44276600 | 1.68217600  |
| C  | 3.56931200  | 0.98512200  | 3.29533700  |
| H  | 4.63409100  | 1.20575900  | 3.19101100  |
| C  | 2.80992300  | 1.63616400  | 4.27167900  |
| H  | 3.27786800  | 2.36839000  | 4.93335800  |
| C  | 1.44621700  | 1.34768200  | 4.39522800  |
| H  | 0.84472300  | 1.85361700  | 5.15385300  |
| C  | 0.84515500  | 0.42374400  | 3.53927400  |
| H  | -0.22700100 | 0.23525800  | 3.62733600  |
| P  | -2.77657200 | -0.66265100 | 0.15692700  |
| P  | 0.73265100  | -1.29707400 | 1.34053000  |
| Pd | -0.53814000 | -0.22102800 | -0.31846800 |
| C  | 2.64714900  | 1.37738500  | -0.76464600 |
| C  | 1.21608300  | 1.74548500  | -1.11161700 |
| H  | 3.07987500  | 2.16050200  | -0.12424000 |
| H  | 2.67744200  | 0.43896300  | -0.20923600 |
| C  | 0.46604800  | 0.87615900  | -1.94479900 |
| C  | -0.95205500 | 0.88590400  | -2.08772700 |
| H  | 1.05036300  | 0.17856000  | -2.55230400 |
| C  | 0.56423200  | 2.81050500  | -0.30629700 |
| C  | -0.27903400 | 3.75985800  | -0.90969800 |
| C  | 0.79118300  | 2.88984500  | 1.07777900  |
| C  | -0.90337300 | 4.74098500  | -0.14049700 |
| H  | -0.41208400 | 3.73904000  | -1.99082100 |
| C  | 0.15555600  | 3.86554600  | 1.84776200  |
| H  | 1.44784500  | 2.17168600  | 1.56445800  |
| C  | -0.69679400 | 4.79164800  | 1.24226600  |
| H  | -1.55681800 | 5.47107300  | -0.62303100 |
| H  | 0.32936200  | 3.89468500  | 2.92556400  |

|   |             |             |             |
|---|-------------|-------------|-------------|
| H | -1.19732000 | 5.55382400  | 1.84361700  |
| C | 3.11893400  | 2.27726700  | -2.97308500 |
| O | 3.77988500  | 2.38608500  | -3.99516400 |
| H | -1.53719800 | 1.75515200  | -1.78632200 |
| H | -1.38781100 | 0.30174300  | -2.90190000 |
| C | -3.50153300 | -1.60449000 | 1.60472500  |
| H | -4.53571100 | -1.23549800 | 1.67937100  |
| H | -2.99401800 | -1.26962200 | 2.52121100  |
| C | -3.51461700 | -3.14163700 | 1.48005000  |
| H | -4.43543500 | -3.50053100 | 1.96767200  |
| H | -3.62519700 | -3.41646400 | 0.41800800  |
| C | -0.27454900 | -2.43032500 | 2.39212000  |
| H | -1.02200900 | -1.79190800 | 2.88252700  |
| H | 0.34370200  | -2.86245200 | 3.19375300  |
| C | -0.94931800 | -3.52539700 | 1.55063900  |
| H | -0.28307000 | -4.40075000 | 1.52462200  |
| H | -1.04167300 | -3.19539600 | 0.50055200  |
| C | -2.33693900 | -3.92593700 | 2.07308900  |
| H | -2.51550000 | -4.99041300 | 1.85005900  |
| H | -2.34863500 | -3.84436700 | 3.17444200  |
| O | 2.13679400  | 2.98753700  | -2.58247900 |
| N | 3.41279900  | 1.23039800  | -1.99167300 |
| C | 4.46400000  | 0.34483400  | -2.08072700 |
| O | 5.12592400  | 0.09365500  | -3.06220600 |
| O | 4.68726300  | -0.24972100 | -0.87739000 |
| C | 5.76586600  | -1.17999100 | -0.83311000 |
| H | 6.72716000  | -0.66730000 | -0.98905600 |
| H | 5.73378900  | -1.63388400 | 0.16413200  |
| H | 5.64732800  | -1.95778200 | -1.59901100 |

A2

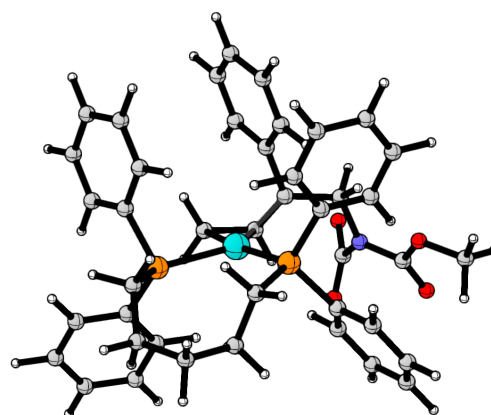

Energy: -2791.41548617

Zero point energy correction: 0.756378

## Atom Coordinates:

|   |             |             |             |    |             |             |             |
|---|-------------|-------------|-------------|----|-------------|-------------|-------------|
| C | -3.48031900 | -1.91148400 | -0.48044700 | H  | -0.01569100 | 1.52825600  | 3.46314900  |
| C | -2.70617800 | -2.73938700 | -1.30780300 | P  | -2.63885300 | -0.65083900 | 0.54123900  |
| H | -1.62539100 | -2.58849300 | -1.36119200 | P  | 0.90497500  | -0.51580300 | 1.57375200  |
| C | -3.31053900 | -3.75267300 | -2.05723300 | Pd | -0.50316700 | -0.07345700 | -0.24293200 |
| H | -2.69845900 | -4.39098300 | -2.69804000 | C  | 2.34369500  | 1.27051300  | -1.81042500 |
| C | -4.69266200 | -3.94529200 | -1.98525000 | C  | 0.83121700  | 1.31046800  | -1.68307100 |
| H | -5.16638900 | -4.73443500 | -2.57354300 | H  | 2.59225000  | 2.10118500  | -2.49775900 |
| C | -5.47017400 | -3.12889800 | -1.15581000 | H  | 2.80454200  | 1.51183400  | -0.84675700 |
| H | -6.55031800 | -3.27946200 | -1.09505600 | C  | 0.00202300  | 0.37974700  | -2.33911600 |
| C | -4.86805500 | -2.12087200 | -0.40118100 | C  | -1.40464800 | 0.36188300  | -2.16843900 |
| H | -5.48586600 | -1.49549300 | 0.24667400  | H  | 0.47081500  | -0.48764900 | -2.80758000 |
| C | -3.50896800 | 0.94551400  | 0.29007400  | C  | 0.30798800  | 2.64628800  | -1.25382800 |
| C | -4.44773600 | 1.16376600  | -0.72784000 | C  | -0.54282200 | 3.38980200  | -2.09308300 |
| H | -4.76198300 | 0.34276900  | -1.37319200 | C  | 0.69801200  | 3.21346300  | -0.02860100 |
| C | -4.96912000 | 2.44469300  | -0.93862200 | C  | -1.02823300 | 4.63613000  | -1.69279900 |
| H | -5.69648400 | 2.60451200  | -1.73788000 | H  | -0.81888600 | 2.99060200  | -3.07009300 |
| C | -4.55767100 | 3.51490100  | -0.14074000 | C  | 0.20860800  | 4.45685200  | 0.37380100  |
| H | -4.96025600 | 4.51524800  | -0.31461300 | H  | 1.37069400  | 2.66732100  | 0.62698500  |
| C | -3.61635800 | 3.30380900  | 0.87284500  | C  | -0.66492800 | 5.16954500  | -0.45242700 |
| H | -3.27449300 | 4.13832100  | 1.48824000  | H  | -1.69309500 | 5.19402600  | -2.35617900 |
| C | -3.09170900 | 2.02891200  | 1.08475300  | H  | 0.51115200  | 4.86308000  | 1.34144700  |
| H | -2.32680000 | 1.88406900  | 1.85167200  | H  | -1.05387300 | 6.14029500  | -0.13658500 |
| C | 2.20633500  | -1.73470100 | 1.17701400  | C  | 2.47372700  | -0.33401900 | -3.75123100 |
| C | 3.11628900  | -2.16649700 | 2.15706700  | O  | 2.23081200  | -1.53486800 | -3.91670400 |
| H | 3.09889900  | -1.72649800 | 3.15709100  | H  | -1.96165400 | 1.27754600  | -1.97594500 |
| C | 4.04948600  | -3.15893800 | 1.85532300  | H  | -1.97197700 | -0.43831500 | -2.64679500 |
| H | 4.75610100  | -3.49037300 | 2.61967800  | C  | -3.23107800 | -1.10652900 | 2.25805200  |
| C | 4.08418500  | -3.72373500 | 0.57412300  | H  | -4.29483400 | -0.82482600 | 2.23104500  |
| H | 4.82139500  | -4.49466300 | 0.33824300  | H  | -2.76050400 | -0.42189400 | 2.97830700  |
| C | 3.18694600  | -3.29197400 | -0.40495400 | C  | -3.11357200 | -2.58200200 | 2.68105500  |
| H | 3.22684400  | -3.70108900 | -1.41534100 | H  | -3.95379100 | -2.78973100 | 3.36327700  |
| C | 2.24568500  | -2.30416200 | -0.10261900 | H  | -3.29185900 | -3.21927800 | 1.79969000  |
| H | 1.56002300  | -1.95728100 | -0.87648500 | C  | 0.02315700  | -1.30736000 | 2.98265500  |
| C | 1.74442900  | 0.91041900  | 2.34536600  | H  | -0.77895900 | -0.61405000 | 3.26685300  |
| C | 3.06105900  | 1.24760900  | 1.99718100  | H  | 0.69995500  | -1.37293300 | 3.84815000  |
| H | 3.62010200  | 0.60658600  | 1.31773200  | C  | -0.53284900 | -2.69009700 | 2.61113100  |
| C | 3.63890400  | 2.42183500  | 2.48756300  | H  | 0.24592100  | -3.44002900 | 2.81378400  |
| H | 4.66190300  | 2.67845300  | 2.20291400  | H  | -0.72110900 | -2.75511300 | 1.52471900  |
| C | 2.91013400  | 3.26799100  | 3.32852800  | C  | -1.82074800 | -3.03398500 | 3.36944300  |
| H | 3.36128000  | 4.18830600  | 3.70609700  | H  | -1.88755800 | -4.12555400 | 3.50384000  |
| C | 1.59835600  | 2.93341900  | 3.68290300  | H  | -1.76631600 | -2.60755700 | 4.38654900  |
| H | 1.02254500  | 3.59086500  | 4.33816000  | O  | 2.35850500  | 0.64371600  | -4.49958200 |
| C | 1.01595400  | 1.76296200  | 3.19326300  | N  | 2.90421000  | 0.04253200  | -2.33501500 |

|   |            |             |             |
|---|------------|-------------|-------------|
| O | 4.76266600 | -1.30345500 | -2.45266700 |
| O | 4.46935800 | 0.07096100  | -0.69162400 |
| C | 5.70829300 | -0.40457100 | -0.17352400 |
| H | 6.53415700 | -0.19085800 | -0.86792900 |
| H | 5.86761400 | 0.12862600  | 0.77235200  |
| H | 5.66491600 | -1.48629300 | 0.01141300  |

|   |             |             |            |
|---|-------------|-------------|------------|
| H | -2.45957100 | 1.95400800  | 1.77351800 |
| C | 2.21221100  | -1.61067200 | 1.40670200 |
| C | 3.08789500  | -1.92214700 | 2.46137000 |
| H | 3.01538200  | -1.38953800 | 3.41269800 |
| C | 4.05845600  | -2.90990200 | 2.29402000 |
| H | 4.73925400  | -3.14799400 | 3.11469800 |

|   |            |             |            |
|---|------------|-------------|------------|
| C | 4.16217500 | -3.59092400 | 1.07407600 |
|---|------------|-------------|------------|

|   |            |             |            |
|---|------------|-------------|------------|
| H | 4.92875800 | -4.35837700 | 0.94278500 |
|---|------------|-------------|------------|

|   |            |             |            |
|---|------------|-------------|------------|
| C | 3.29864900 | -3.27944900 | 0.02267200 |
|---|------------|-------------|------------|

|   |            |             |             |
|---|------------|-------------|-------------|
| H | 3.39686600 | -3.78015800 | -0.94086200 |
|---|------------|-------------|-------------|

|   |            |             |            |
|---|------------|-------------|------------|
| C | 2.32111100 | -2.29374700 | 0.18968500 |
|---|------------|-------------|------------|

|   |            |             |             |
|---|------------|-------------|-------------|
| H | 1.66713900 | -2.02537700 | -0.63995900 |
|---|------------|-------------|-------------|

|   |            |            |            |
|---|------------|------------|------------|
| C | 1.70091900 | 1.10716000 | 2.29652000 |
|---|------------|------------|------------|

|   |            |            |            |
|---|------------|------------|------------|
| C | 3.01744600 | 1.42265200 | 1.92287300 |
|---|------------|------------|------------|

|   |            |            |            |
|---|------------|------------|------------|
| H | 3.58642200 | 0.74202800 | 1.28869700 |
|---|------------|------------|------------|

|   |            |            |            |
|---|------------|------------|------------|
| C | 3.58906400 | 2.63234400 | 2.32751500 |
|---|------------|------------|------------|

|   |            |            |            |
|---|------------|------------|------------|
| H | 4.61035000 | 2.87192500 | 2.02229600 |
|---|------------|------------|------------|

|   |            |            |            |
|---|------------|------------|------------|
| C | 2.85804000 | 3.53418800 | 3.10629700 |
|---|------------|------------|------------|

|   |            |            |            |
|---|------------|------------|------------|
| H | 3.30617300 | 4.48083400 | 3.41661700 |
|---|------------|------------|------------|

|   |            |            |            |
|---|------------|------------|------------|
| C | 1.54766600 | 3.22125700 | 3.48517500 |
|---|------------|------------|------------|

|   |            |            |            |
|---|------------|------------|------------|
| H | 0.96993200 | 3.92198400 | 4.09223500 |
|---|------------|------------|------------|

|   |            |            |            |
|---|------------|------------|------------|
| C | 0.96983100 | 2.01647600 | 3.08078500 |
|---|------------|------------|------------|

|   |             |            |            |
|---|-------------|------------|------------|
| H | -0.06087800 | 1.79735900 | 3.36718700 |
|---|-------------|------------|------------|

|   |             |             |            |
|---|-------------|-------------|------------|
| P | -2.66754000 | -0.64059300 | 0.53545900 |
|---|-------------|-------------|------------|

|   |            |             |            |
|---|------------|-------------|------------|
| P | 0.87750700 | -0.38313600 | 1.63636800 |
|---|------------|-------------|------------|

|    |             |             |             |
|----|-------------|-------------|-------------|
| Pd | -0.51342700 | -0.12934100 | -0.24311300 |
|----|-------------|-------------|-------------|

|   |            |            |             |
|---|------------|------------|-------------|
| C | 2.33600200 | 1.16870600 | -1.68543000 |
|---|------------|------------|-------------|

|   |            |            |             |
|---|------------|------------|-------------|
| C | 0.82229200 | 1.24758000 | -1.69521100 |
|---|------------|------------|-------------|

|   |            |            |             |
|---|------------|------------|-------------|
| H | 2.65844200 | 2.02018700 | -2.33287100 |
|---|------------|------------|-------------|

|   |            |            |             |
|---|------------|------------|-------------|
| H | 2.68749900 | 1.45848600 | -0.67959600 |
|---|------------|------------|-------------|

|   |            |            |             |
|---|------------|------------|-------------|
| C | 0.07561500 | 0.24235600 | -2.33923100 |
|---|------------|------------|-------------|

|   |             |            |             |
|---|-------------|------------|-------------|
| C | -1.33476000 | 0.13600300 | -2.23471800 |
|---|-------------|------------|-------------|

|   |            |             |             |
|---|------------|-------------|-------------|
| H | 0.65190200 | -0.59636300 | -2.73432200 |
|---|------------|-------------|-------------|

|   |            |            |             |
|---|------------|------------|-------------|
| C | 0.23679900 | 2.57984800 | -1.36096600 |
|---|------------|------------|-------------|

|   |             |            |             |
|---|-------------|------------|-------------|
| C | -0.66388600 | 3.21710400 | -2.23667700 |
|---|-------------|------------|-------------|

|   |            |            |             |
|---|------------|------------|-------------|
| C | 0.61634000 | 3.26064700 | -0.19022300 |
|---|------------|------------|-------------|

|   |             |            |             |
|---|-------------|------------|-------------|
| C | -1.20223400 | 4.46639600 | -1.92577700 |
|---|-------------|------------|-------------|

|   |             |            |             |
|---|-------------|------------|-------------|
| H | -0.93302300 | 2.73458900 | -3.17688900 |
|---|-------------|------------|-------------|

|   |            |            |            |
|---|------------|------------|------------|
| C | 0.07493400 | 4.50817700 | 0.12270000 |
|---|------------|------------|------------|

|   |            |            |            |
|---|------------|------------|------------|
| H | 1.32377500 | 2.79923700 | 0.49266500 |
|---|------------|------------|------------|

|   |             |            |             |
|---|-------------|------------|-------------|
| C | -0.84451000 | 5.11315500 | -0.73887000 |
|---|-------------|------------|-------------|

|   |             |            |             |
|---|-------------|------------|-------------|
| H | -1.90414700 | 4.93825100 | -2.61715100 |
|---|-------------|------------|-------------|

|   |            |            |            |
|---|------------|------------|------------|
| H | 0.37312900 | 5.00291300 | 1.04975000 |
|---|------------|------------|------------|

|   |             |            |             |
|---|-------------|------------|-------------|
| H | -1.27450000 | 6.08655900 | -0.49180000 |
|---|-------------|------------|-------------|

TS-A2

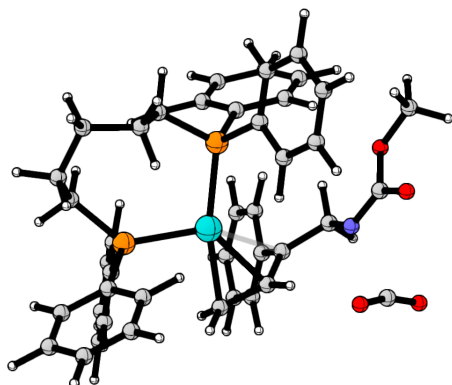

Energy: -2791.39602242

Zero point energy correction: 0.751858

Atom Coordinates:

|   |             |             |             |
|---|-------------|-------------|-------------|
| C | -3.51714400 | -1.95210100 | -0.41526700 |
|---|-------------|-------------|-------------|

|   |             |             |             |
|---|-------------|-------------|-------------|
| C | -2.74195200 | -2.85412900 | -1.15922900 |
|---|-------------|-------------|-------------|

|   |             |             |             |
|---|-------------|-------------|-------------|
| H | -1.65741100 | -2.72684000 | -1.19410400 |
|---|-------------|-------------|-------------|

|   |             |             |             |
|---|-------------|-------------|-------------|
| C | -3.34965200 | -3.90757700 | -1.84831900 |
|---|-------------|-------------|-------------|

|   |             |             |             |
|---|-------------|-------------|-------------|
| H | -2.73644000 | -4.60436300 | -2.42388800 |
|---|-------------|-------------|-------------|

|   |             |             |             |
|---|-------------|-------------|-------------|
| C | -4.73718600 | -4.06569900 | -1.79930000 |
|---|-------------|-------------|-------------|

|   |             |             |             |
|---|-------------|-------------|-------------|
| H | -5.21386900 | -4.88627200 | -2.34039800 |
|---|-------------|-------------|-------------|

|   |             |             |             |
|---|-------------|-------------|-------------|
| C | -5.51657900 | -3.17367900 | -1.05361500 |
|---|-------------|-------------|-------------|

|   |             |             |             |
|---|-------------|-------------|-------------|
| H | -6.60118200 | -3.29639800 | -1.01160700 |
|---|-------------|-------------|-------------|

|   |             |             |             |
|---|-------------|-------------|-------------|
| C | -4.91067200 | -2.12553300 | -0.35884200 |
|---|-------------|-------------|-------------|

|   |             |             |            |
|---|-------------|-------------|------------|
| H | -5.52952200 | -1.43948100 | 0.22339300 |
|---|-------------|-------------|------------|

|   |             |            |            |
|---|-------------|------------|------------|
| C | -3.52485600 | 0.94229800 | 0.17231600 |
|---|-------------|------------|------------|

|   |             |            |             |
|---|-------------|------------|-------------|
| C | -4.39831800 | 1.11438600 | -0.91122200 |
|---|-------------|------------|-------------|

|   |             |            |             |
|---|-------------|------------|-------------|
| H | -4.66778700 | 0.26616800 | -1.54164800 |
|---|-------------|------------|-------------|

|   |             |            |             |
|---|-------------|------------|-------------|
| C | -4.91515900 | 2.38108900 | -1.20354500 |
|---|-------------|------------|-------------|

|   |             |            |             |
|---|-------------|------------|-------------|
| H | -5.59162000 | 2.50300900 | -2.05268000 |
|---|-------------|------------|-------------|

|   |             |            |             |
|---|-------------|------------|-------------|
| C | -4.56458500 | 3.48467000 | -0.42235200 |
|---|-------------|------------|-------------|

|   |             |            |             |
|---|-------------|------------|-------------|
| H | -4.96249400 | 4.47381300 | -0.65942300 |
|---|-------------|------------|-------------|

|   |             |            |            |
|---|-------------|------------|------------|
| C | -3.68931400 | 3.32034500 | 0.65639700 |
|---|-------------|------------|------------|

|   |             |            |            |
|---|-------------|------------|------------|
| H | -3.39432400 | 4.18033500 | 1.26085400 |
|---|-------------|------------|------------|

|   |             |            |            |
|---|-------------|------------|------------|
| C | -3.16980900 | 2.05957500 | 0.95004000 |
|---|-------------|------------|------------|

|   |             |             |             |
|---|-------------|-------------|-------------|
| C | 2.75760000  | -0.91207900 | -4.35334200 |
| O | 2.08392000  | -1.85816700 | -4.17851100 |
| H | -1.96458500 | 1.01789600  | -2.12500800 |
| H | -1.82279100 | -0.72761200 | -2.69105700 |
| C | -3.29092600 | -0.98634600 | 2.26725200  |
| H | -4.35962300 | -0.73046300 | 2.20392700  |
| H | -2.84696900 | -0.24763000 | 2.95032600  |
| C | -3.14489800 | -2.42761300 | 2.78883600  |
| H | -4.00543100 | -2.62250000 | 3.44920500  |
| H | -3.26304700 | -3.12714800 | 1.94490700  |
| C | -0.03761100 | -1.05697600 | 3.08710000  |
| H | -0.86155800 | -0.35884600 | 3.28031100  |
| H | 0.60863000  | -1.03472500 | 3.97765400  |
| C | -0.56007100 | -2.47589200 | 2.81718200  |
| H | 0.22390600  | -3.19201900 | 3.10439500  |
| H | -0.71213400 | -2.62992000 | 1.73418600  |
| C | -1.86763500 | -2.78413100 | 3.55796400  |
| H | -1.91453900 | -3.86125300 | 3.78573900  |
| H | -1.86152200 | -2.26879000 | 4.53461300  |
| O | 3.39640600  | -0.07705000 | -4.87295700 |
| N | 2.85846800  | -0.07368400 | -2.14878900 |
| C | 4.03406300  | -0.50893500 | -1.73677800 |
| O | 4.65641100  | -1.48282700 | -2.18406500 |
| O | 4.61317800  | 0.22053800  | -0.68699100 |
| C | 5.84005700  | -0.27459900 | -0.18707000 |
| H | 6.59705000  | -0.36141800 | -0.98265100 |
| H | 6.18340400  | 0.44444000  | 0.57165200  |
| H | 5.71804900  | -1.26476000 | 0.28012700  |

A3

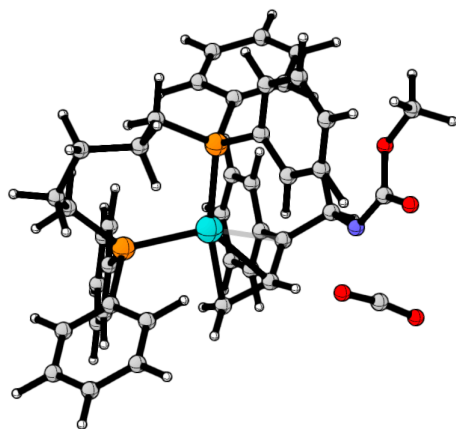

Energy: -2791.39827717

Zero point energy correction: 0.752391

Atom Coordinates:

|   |             |             |             |
|---|-------------|-------------|-------------|
| C | 3.37927800  | -2.13179200 | 0.06786200  |
| C | 2.56200700  | -3.08854100 | 0.68847900  |
| H | 1.48789700  | -2.90628000 | 0.76988600  |
| C | 3.11444500  | -4.26880600 | 1.19441700  |
| H | 2.46868500  | -5.00718500 | 1.67466900  |
| C | 4.48808100  | -4.50033800 | 1.08479300  |
| H | 4.92152900  | -5.42058700 | 1.48309500  |
| C | 5.30883200  | -3.55380400 | 0.46054900  |
| H | 6.38256000  | -3.73341600 | 0.37085100  |
| C | 4.75785700  | -2.37825900 | -0.05194600 |
| H | 5.40821500  | -1.65033300 | -0.54162900 |
| C | 3.56889500  | 0.81091000  | -0.08162300 |
| C | 4.46951400  | 0.76025500  | 0.99193200  |
| H | 4.69089800  | -0.18995200 | 1.47933200  |
| C | 5.07309400  | 1.93265700  | 1.45903900  |
| H | 5.77055400  | 1.88121800  | 2.29836100  |
| C | 4.78187700  | 3.16228500  | 0.86384800  |
| H | 5.24740600  | 4.07696000  | 1.23753700  |
| C | 3.87819900  | 3.22005400  | -0.20249600 |
| H | 3.62843700  | 4.17949600  | -0.65956200 |
| C | 3.27293100  | 2.05381600  | -0.67072300 |
| H | 2.54107200  | 2.11910000  | -1.47948000 |
| C | -2.32470000 | -1.18536000 | -1.52646300 |
| C | -3.20325800 | -1.32550300 | -2.61608600 |
| H | -3.10547200 | -0.67750700 | -3.49052100 |
| C | -4.20708500 | -2.29290200 | -2.58306200 |
| H | -4.88812600 | -2.39882700 | -3.43093400 |
| C | -4.34227000 | -3.12471600 | -1.46323700 |
| H | -5.13282400 | -3.87877000 | -1.43861600 |
| C | -3.48102100 | -2.97879200 | -0.37510500 |
| H | -3.59669600 | -3.59124500 | 0.51814800  |
| C | -2.47125300 | -2.01166800 | -0.40673300 |
| H | -1.82696100 | -1.87772800 | 0.46162800  |
| C | -1.69133500 | 1.60510400  | -2.02211300 |
| C | -2.98380100 | 1.92362900  | -1.57415500 |
| H | -3.57438300 | 1.18516500  | -1.03040300 |
| C | -3.50238100 | 3.20415700  | -1.78698100 |
| H | -4.50470800 | 3.44446100  | -1.42479800 |
| C | -2.74234300 | 4.17370100  | -2.44763100 |
| H | -3.14904500 | 5.17472500  | -2.60837800 |
| C | -1.45628100 | 3.85848600  | -2.90095500 |
| H | -0.85636200 | 4.61184200  | -3.41662500 |
| C | -0.93074600 | 2.58293000  | -2.68696800 |

|    |             |             |             |
|----|-------------|-------------|-------------|
| H  | 0.08343000  | 2.36004700  | -3.02543000 |
| P  | 2.60146800  | -0.64154200 | -0.65489300 |
| P  | -0.93374400 | -0.00292900 | -1.60281000 |
| Pd | 0.50373700  | -0.11074200 | 0.25592000  |
| C  | -2.23126900 | 1.13760400  | 1.94308500  |
| C  | -0.71392800 | 1.12537100  | 1.92036200  |
| H  | -2.48307500 | 1.94057800  | 2.67858000  |
| H  | -2.58167500 | 1.55428600  | 0.98117600  |
| C  | -0.02932600 | -0.00863800 | 2.39618500  |
| C  | 1.36793800  | -0.19626800 | 2.24387300  |
| H  | -0.67431000 | -0.84654900 | 2.67066600  |
| C  | -0.04964400 | 2.45102900  | 1.75596300  |
| C  | 0.90189000  | 2.90872200  | 2.68795200  |
| C  | -0.40640000 | 3.30587100  | 0.69760400  |
| C  | 1.50605200  | 4.15812000  | 2.53892200  |
| H  | 1.15995600  | 2.28477400  | 3.54457000  |
| C  | 0.20118300  | 4.55276100  | 0.54592700  |
| H  | -1.14862000 | 2.98071700  | -0.02584000 |
| C  | 1.16636200  | 4.98191800  | 1.46139600  |
| H  | 2.24618200  | 4.48993600  | 3.27071300  |
| H  | -0.08159900 | 5.18679700  | -0.29744300 |
| H  | 1.64690500  | 5.95560900  | 1.34085100  |
| C  | -2.71019600 | -2.59500800 | 3.61847700  |
| O  | -2.13802700 | -3.09352500 | 2.73161500  |
| H  | 2.05836500  | 0.64657500  | 2.25194500  |
| H  | 1.79968000  | -1.14937800 | 2.55703000  |
| C  | 3.17819300  | -0.76439800 | -2.43272000 |
| H  | 4.26294700  | -0.59558800 | -2.35384800 |
| H  | 2.78189200  | 0.09805800  | -2.98783400 |
| C  | 2.92619800  | -2.09647200 | -3.16159100 |
| H  | 3.76101800  | -2.24394400 | -3.86585000 |
| H  | 3.00997900  | -2.92208600 | -2.43585300 |
| C  | -0.08242400 | -0.49850400 | -3.16032700 |
| H  | 0.78288100  | 0.16891200  | -3.26420600 |
| H  | -0.73764400 | -0.29647600 | -4.02110200 |
| C  | 0.34481500  | -1.97402400 | -3.12828500 |
| H  | -0.49173100 | -2.58093400 | -3.50479300 |
| H  | 0.50042900  | -2.31043800 | -2.08749500 |
| C  | 1.61568500  | -2.24907700 | -3.94133700 |
| H  | 1.58579500  | -3.28009100 | -4.32933100 |
| H  | 1.62801400  | -1.59286000 | -4.82960900 |
| O  | -3.20075700 | -2.22313500 | 4.60638500  |
| N  | -2.80762400 | -0.11525400 | 2.29710900  |
| C  | -3.98502800 | -0.46155200 | 1.83202600  |

|   |             |             |             |
|---|-------------|-------------|-------------|
| O | -4.61636200 | -1.49998900 | 2.10331000  |
| O | -4.58055000 | 0.44322600  | 0.92906700  |
| C | -5.80038200 | 0.03367800  | 0.34561300  |
| H | -6.54756700 | -0.23513100 | 1.10916200  |
| H | -6.16947700 | 0.88489100  | -0.24667100 |
| H | -5.66281200 | -0.83532400 | -0.31811000 |

### A3' (CO<sub>2</sub> removed)

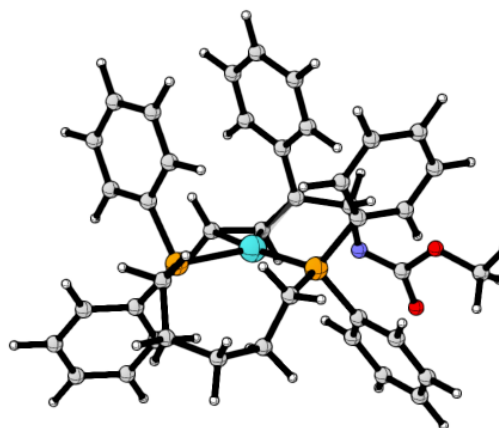

Energy: -2602.93645020

Zero point energy correction: 0.739203

Atom Coordinates:

|   |             |             |             |
|---|-------------|-------------|-------------|
| C | -3.48358000 | -1.86260800 | -0.43273000 |
| C | -2.83540800 | -2.70705400 | -1.34651300 |
| H | -1.75887800 | -2.60461300 | -1.50235000 |
| C | -3.55832600 | -3.67458800 | -2.05040300 |
| H | -3.04357500 | -4.32719800 | -2.75891700 |
| C | -4.93470800 | -3.80371400 | -1.84686000 |
| H | -5.50133600 | -4.55676700 | -2.39931700 |
| C | -5.58712400 | -2.96989100 | -0.93132800 |
| H | -6.66244300 | -3.07060100 | -0.76778100 |
| C | -4.86551400 | -2.00847600 | -0.22184200 |
| H | -5.38533600 | -1.36712900 | 0.49316500  |
| C | -3.33347700 | 0.95811400  | 0.42190400  |
| C | -4.32339800 | 1.24806700  | -0.52794300 |
| H | -4.68215700 | 0.46927900  | -1.20184700 |
| C | -4.84320400 | 2.54287700  | -0.62884100 |
| H | -5.61241500 | 2.75743500  | -1.37438500 |
| C | -4.37959900 | 3.55729000  | 0.21220600  |
| H | -4.78179200 | 4.56905600  | 0.12512200  |
| C | -3.38665100 | 3.27575400  | 1.15651500  |
| H | -3.00431400 | 4.06703800  | 1.80433300  |
| C | -2.86353400 | 1.98673100  | 1.25870200  |

|    |             |             |             |
|----|-------------|-------------|-------------|
| H  | -2.06281000 | 1.79033300  | 1.97549300  |
| C  | 2.42190800  | -1.83313300 | 0.68790900  |
| C  | 3.36267200  | -2.31912900 | 1.61350400  |
| H  | 3.38891000  | -1.92548800 | 2.63239700  |
| C  | 4.27361000  | -3.30344900 | 1.23087300  |
| H  | 5.00440300  | -3.67767300 | 1.95181500  |
| C  | 4.25429400  | -3.80631100 | -0.07688200 |
| H  | 4.97522100  | -4.57100000 | -0.37610100 |
| C  | 3.32856300  | -3.31946100 | -1.00067900 |
| H  | 3.33634500  | -3.67146600 | -2.03188600 |
| C  | 2.40951200  | -2.33692600 | -0.61756200 |
| H  | 1.71453200  | -1.92360100 | -1.34886300 |
| C  | 2.15196900  | 0.79300700  | 1.87771100  |
| C  | 3.43057400  | 1.08607900  | 1.37556300  |
| H  | 3.88429000  | 0.44716300  | 0.61686000  |
| C  | 4.11124800  | 2.22441200  | 1.81703000  |
| H  | 5.10038600  | 2.44926300  | 1.41131300  |
| C  | 3.52884300  | 3.07450000  | 2.76174700  |
| H  | 4.06243300  | 3.96499200  | 3.10173600  |
| C  | 2.25752600  | 2.78267300  | 3.26898400  |
| H  | 1.79571800  | 3.44397500  | 4.00570100  |
| C  | 1.56978700  | 1.65119900  | 2.82687400  |
| H  | 0.56762600  | 1.45064900  | 3.21161900  |
| P  | -2.48258400 | -0.66658000 | 0.52457400  |
| P  | 1.17871800  | -0.59176400 | 1.19166100  |
| Pd | -0.42567800 | -0.11403500 | -0.46639600 |
| C  | 2.27403100  | 1.25038200  | -2.09264200 |
| C  | 0.77288600  | 1.37907800  | -1.91216000 |
| H  | 2.56499900  | 2.18879900  | -2.62627700 |
| H  | 2.74436500  | 1.37111000  | -1.09928600 |
| C  | -0.07114200 | 0.46462500  | -2.57134200 |
| C  | -1.46144600 | 0.35839300  | -2.31553400 |
| H  | 0.46370400  | -0.31598200 | -3.12048700 |
| C  | 0.28028200  | 2.67453900  | -1.36045500 |
| C  | -0.71904100 | 3.41552500  | -2.02184800 |
| C  | 0.84582900  | 3.22101000  | -0.19388700 |
| C  | -1.17027400 | 4.63115400  | -1.50637000 |
| H  | -1.13600800 | 3.04191100  | -2.95758100 |
| C  | 0.39134700  | 4.43437800  | 0.32414500  |
| H  | 1.63357200  | 2.68160200  | 0.32407400  |
| C  | -0.62584000 | 5.14100800  | -0.32370100 |
| H  | -1.95146800 | 5.18371100  | -2.03338300 |
| H  | 0.83577000  | 4.82311400  | 1.24316100  |
| H  | -0.98697200 | 6.08760900  | 0.08503600  |

|   |             |             |             |
|---|-------------|-------------|-------------|
| H | -2.05795600 | 1.22897700  | -2.04498800 |
| H | -2.01627800 | -0.45006700 | -2.79681700 |
| C | -2.90871600 | -1.16679200 | 2.27887000  |
| H | -3.97050900 | -0.88982000 | 2.36464000  |
| H | -2.36996600 | -0.50338500 | 2.97085500  |
| C | -2.74361600 | -2.65217700 | 2.64697100  |
| H | -3.52385700 | -2.89174900 | 3.38757200  |
| H | -2.98242500 | -3.26843000 | 1.76441800  |
| C | 0.41654200  | -1.36874600 | 2.67959500  |
| H | -0.35429800 | -0.67040000 | 3.02998200  |
| H | 1.16195100  | -1.44146900 | 3.48597300  |
| C | -0.17910100 | -2.74581300 | 2.35058300  |
| H | 0.61253700  | -3.50019300 | 2.46912700  |
| H | -0.46874400 | -2.79320000 | 1.28586500  |
| C | -1.39359900 | -3.09996800 | 3.21781200  |
| H | -1.44213400 | -4.19270000 | 3.35172300  |
| H | -1.25411800 | -2.67789000 | 4.22880300  |
| N | 2.66513700  | 0.07888900  | -2.80238500 |
| C | 3.86028300  | -0.43380600 | -2.61252800 |
| O | 4.36678200  | -1.40522000 | -3.19498300 |
| O | 4.63960600  | 0.20526800  | -1.61472900 |
| C | 5.88193400  | -0.39320600 | -1.31586300 |
| H | 6.50074800  | -0.52648900 | -2.21791100 |
| H | 6.39816400  | 0.27831900  | -0.61232300 |
| H | 5.75817600  | -1.38212200 | -0.84270300 |

### A3

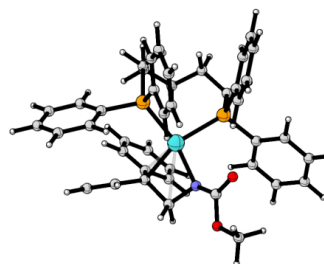

Energy: -2602.94622331

Zero point energy correction: 0.739957

Atom Coordinates:

|   |             |            |             |
|---|-------------|------------|-------------|
| C | -1.09411600 | 2.61906100 | 0.31555400  |
| C | -1.29318600 | 3.86953800 | -0.28901900 |
| H | -1.77568300 | 3.94625000 | -1.26423900 |
| C | -0.87994300 | 5.03883000 | 0.35602400  |
| H | -1.03148800 | 6.00542700 | -0.13015500 |
| C | -0.28339800 | 4.97466700 | 1.61832900  |
| H | 0.03515200  | 5.89081900 | 2.12089300  |

C -0.08438900 3.73345700 2.22817500  
H 0.39616100 3.67207600 3.20718800  
C -0.47391100 2.56322700 1.57540800  
H -0.28403700 1.59159700 2.03796800  
C -3.39389200 0.94371100 0.23506900  
C -4.45073400 0.44071500 -0.53983700  
H -4.28479200 0.13327900 -1.57172000  
C -5.73646300 0.32700300 -0.00352400  
H -6.54464500 -0.06866600 -0.62318200  
C -5.98873600 0.72373600 1.31171300  
H -6.99478700 0.63862700 1.72885400  
C -4.94350600 1.22999300 2.08936200  
H -5.12785100 1.54423500 3.11939900  
C -3.65694600 1.33301300 1.55848800  
H -2.85440900 1.72800100 2.18202500  
C 2.28115600 1.88261800 -1.01042300  
C 2.40603400 2.68795700 -2.15293400  
H 2.25357700 2.27134400 -3.14850800  
C 2.73403900 4.04197600 -2.02794700  
H 2.82291800 4.66103500 -2.92389800  
C 2.95165100 4.59835000 -0.76510600  
H 3.20620700 5.65649800 -0.66897200  
C 2.83999800 3.79591800 0.37579700  
H 3.00451200 4.22692100 1.36562900  
C 2.49849800 2.44899700 0.25880000  
H 2.40902600 1.81355300 1.14256400  
C 3.28011700 -0.81919100 -0.61987600  
C 4.52518900 -0.21399300 -0.40725400  
H 4.62514300 0.86986900 -0.47873300  
C 5.64129800 -0.99177100 -0.08708400  
H 6.60658300 -0.50805000 0.08196600  
C 5.52483000 -2.38111600 0.01921100  
H 6.39727700 -2.98761300 0.27417600  
C 4.28637000 -2.99120500 -0.20681100  
H 4.18665300 -4.07661700 -0.12869700  
C 3.16928600 -2.21528600 -0.52234000  
H 2.20167100 -2.69493100 -0.67312500  
P -1.67941200 1.04323100 -0.43528800  
P 1.76931400 0.12951600 -1.06053800  
Pd -0.13588000 -0.55916200 0.24771300  
C -0.17043000 -2.49563000 2.09571400  
C -1.35724200 -2.08093700 1.19872300  
H -0.38242400 -2.24075600 3.14725100  
H -0.00004000 -3.59066500 2.07547800

C -2.53336700 -1.68318300 2.00007000  
H -2.30937900 -0.92120400 2.75517700  
C -1.53340800 -2.85683400 -0.06277200  
C -0.54025200 -3.75104900 -0.52728200  
C -2.65656900 -2.66097800 -0.90136100  
C -0.66350600 -4.40667400 -1.75454200  
H 0.35620900 -3.91658900 0.06921600  
C -2.78041400 -3.31965300 -2.12216500  
H -3.42975100 -1.95935600 -0.59560200  
C -1.78474900 -4.20017300 -2.56243400  
H 0.13026700 -5.08370000 -2.08102300  
H -3.66087900 -3.13475400 -2.74330700  
H -1.87982700 -4.71177600 -3.52296500  
C -1.94898000 1.46919500 -2.22083100  
H -1.09486800 2.10725900 -2.49137100  
H -2.84615600 2.10250500 -2.28699900  
C -2.05243100 0.29134600 -3.20297500  
H -2.25097500 0.71828600 -4.20160300  
H -2.92468800 -0.33501400 -2.96325800  
C -0.81439000 -0.60319500 -3.26263100  
H -1.00262600 -1.42539800 -3.96960600  
H -0.68543500 -1.09112500 -2.28423800  
C 0.47532500 0.13802500 -3.65242900  
H 0.35147300 1.22395900 -3.52746900  
H 0.67935600 -0.00506100 -4.72614800  
C 1.70139900 -0.32476800 -2.86589900  
H 1.75824700 -1.42467000 -2.87440300  
H 2.63860400 0.03665900 -3.31791700  
C -3.78105800 -2.17819000 1.97950000  
H -4.53668400 -1.79824200 2.67082800  
H -4.09336200 -2.95947700 1.28391500  
N 0.92894000 -1.70809500 1.57210900  
C 1.89523700 -1.23444300 2.36334900  
O 2.57429700 -0.22131300 2.18997700  
O 2.10781500 -2.03397600 3.46356900  
C 3.13241000 -1.61445300 4.35030200  
H 2.92837800 -0.61188800 4.75899500  
H 3.15765800 -2.34899700 5.16652700  
H 4.11130100 -1.58611300 3.84588500

**TS-A3**

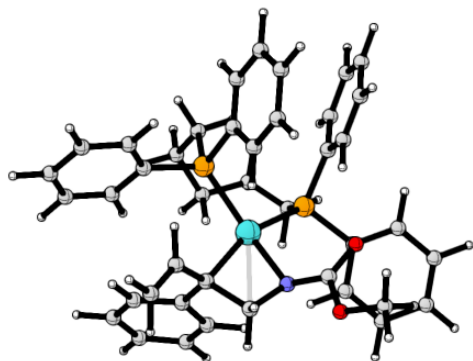

Energy: -2602.93981858

Zero point energy correction: 0.739174

Atom Coordinates:

|    |             |             |             |
|----|-------------|-------------|-------------|
| C  | -0.78433300 | 2.57546900  | 0.71208200  |
| C  | -0.66952200 | 3.91963300  | 0.32921700  |
| H  | -0.95785200 | 4.24062400  | -0.67159800 |
| C  | -0.17205000 | 4.86931500  | 1.22558700  |
| H  | -0.07455600 | 5.91027000  | 0.90914700  |
| C  | 0.20381000  | 4.49066300  | 2.51646900  |
| H  | 0.59459600  | 5.23509900  | 3.21406600  |
| C  | 0.08712200  | 3.15333200  | 2.90902100  |
| H  | 0.38619600  | 2.84669900  | 3.91387500  |
| C  | -0.39662600 | 2.20151700  | 2.01121500  |
| H  | -0.45842700 | 1.15202400  | 2.30800300  |
| C  | -3.22445800 | 1.24475600  | -0.07150600 |
| C  | -4.03121900 | 0.35258400  | -0.79651900 |
| H  | -3.58255100 | -0.32437300 | -1.52208400 |
| C  | -5.40805000 | 0.29699500  | -0.57090500 |
| H  | -6.02009600 | -0.40549500 | -1.14145200 |
| C  | -5.99430100 | 1.11880400  | 0.39572700  |
| H  | -7.06983500 | 1.06797700  | 0.58039500  |
| C  | -5.19664400 | 2.00235600  | 1.12993300  |
| H  | -5.64741700 | 2.64517400  | 1.88973500  |
| C  | -3.82054800 | 2.06953300  | 0.89660500  |
| H  | -3.20844500 | 2.76252400  | 1.47509100  |
| C  | 2.36557500  | 1.69951700  | -1.04183100 |
| C  | 2.60775200  | 2.54456900  | -2.13527400 |
| H  | 2.50422300  | 2.17820500  | -3.15672200 |
| C  | 2.99316200  | 3.87356800  | -1.92626900 |
| H  | 3.17016300  | 4.52594700  | -2.78467600 |
| C  | 3.15671700  | 4.36102600  | -0.62752900 |
| H  | 3.45357900  | 5.40009500  | -0.46630700 |
| C  | 2.94209400  | 3.51396100  | 0.46561600  |
| H  | 3.07201500  | 3.88839300  | 1.48275900  |
| C  | 2.54186200  | 2.19393700  | 0.26432800  |
| H  | 2.38150500  | 1.52313100  | 1.11039700  |
| C  | 3.21726100  | -1.07327600 | -0.85469600 |
| C  | 4.50616900  | -0.54788600 | -0.69876900 |
| H  | 4.66628900  | 0.53005600  | -0.75325700 |
| C  | 5.58772800  | -1.39823500 | -0.45460200 |
| H  | 6.58848600  | -0.97781300 | -0.32789600 |
| C  | 5.39174100  | -2.78018100 | -0.36912800 |
| H  | 6.23767500  | -3.44355200 | -0.17349000 |
| C  | 4.10813200  | -3.30986300 | -0.53843300 |
| H  | 3.94655900  | -4.38867300 | -0.47446500 |
| C  | 3.02552400  | -2.46113800 | -0.77806900 |
| H  | 2.02352900  | -2.87819600 | -0.88409200 |
| P  | -1.41989100 | 1.26290200  | -0.40766600 |
| P  | 1.75491300  | -0.01541700 | -1.19671000 |
| Pd | -0.13105500 | -0.57328500 | 0.17081800  |
| C  | -0.32922500 | -2.45662000 | 2.07150400  |
| C  | -1.49892700 | -1.81193600 | 1.28246200  |
| H  | -0.40355300 | -2.21059400 | 3.14213700  |
| H  | -0.34158300 | -3.56192400 | 1.99346200  |
| C  | -2.53271800 | -1.17443100 | 2.16984400  |
| H  | -2.61631800 | -0.08427000 | 2.16994600  |
| C  | -2.00134300 | -2.65297500 | 0.15375900  |
| C  | -1.10837900 | -3.46568900 | -0.59075200 |
| C  | -3.35559000 | -2.66846600 | -0.23877200 |
| C  | -1.54033900 | -4.20236100 | -1.69243200 |
| H  | -0.05629100 | -3.49931000 | -0.30670100 |
| C  | -3.78713600 | -3.40661400 | -1.34359200 |
| H  | -4.07806300 | -2.09544200 | 0.33798900  |
| C  | -2.88360200 | -4.17004000 | -2.08812400 |
| H  | -0.81990900 | -4.80844200 | -2.24827100 |
| H  | -4.84488100 | -3.38606000 | -1.62057200 |
| H  | -3.22125800 | -4.74368800 | -2.95451200 |
| C  | -1.35209600 | 2.05700700  | -2.08246600 |
| H  | -0.31147200 | 2.39326200  | -2.21424300 |
| H  | -1.98003300 | 2.95918600  | -2.04296800 |
| C  | -1.79506500 | 1.16943700  | -3.25104300 |
| H  | -1.76904500 | 1.78756500  | -4.16537800 |
| H  | -2.84878400 | 0.88188500  | -3.12084900 |
| C  | -0.92928500 | -0.07459900 | -3.46539800 |
| H  | -1.38818300 | -0.69411400 | -4.25140400 |
| H  | -0.93904600 | -0.69518600 | -2.55382500 |
| C  | 0.52130200  | 0.27667600  | -3.85547100 |



|   |             |             |             |
|---|-------------|-------------|-------------|
| H | 0.65571500  | 1.36882000  | -3.84114000 |
| H | 0.69979900  | -0.01567000 | -4.90282300 |
| C | 1.61585300  | -0.38606900 | -3.01840500 |
| H | 1.49040600  | -1.48074200 | -3.04246200 |
| H | 2.60915400  | -0.18330100 | -3.45021100 |
| C | -3.34533200 | -1.85768700 | 2.98483500  |
| H | -4.06185300 | -1.34504100 | 3.63378300  |
| H | -3.33049200 | -2.95211000 | 3.02873800  |
| N | 0.83868900  | -1.84293900 | 1.46290800  |
| C | 1.89336600  | -1.48253100 | 2.20140400  |
| O | 2.68975500  | -0.57087800 | 1.97598400  |
| O | 2.05000500  | -2.27859300 | 3.31414000  |
| C | 3.14055100  | -1.95709300 | 4.16204500  |
| H | 3.05623600  | -0.93261600 | 4.55900200  |
| H | 3.11357600  | -2.67779000 | 4.99050300  |
| H | 4.10094600  | -2.03915300 | 3.62904300  |

A4

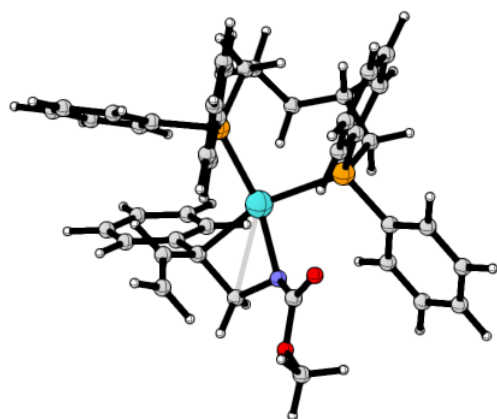

Energy: -2602.95640037

Zero point energy correction: 0.740488

Atom Coordinates:

|   |             |            |             |
|---|-------------|------------|-------------|
| C | -0.59879800 | 2.46552700 | 0.90005700  |
| C | -0.41470300 | 3.83203600 | 0.64367600  |
| H | -0.67320200 | 4.25902600 | -0.32503600 |
| C | 0.11350200  | 4.67010700 | 1.62944900  |
| H | 0.26360200  | 5.72998400 | 1.41177200  |
| C | 0.45113800  | 4.15702700 | 2.88395900  |
| H | 0.86425000  | 4.81504900 | 3.65204000  |
| C | 0.26824000  | 2.79620400 | 3.14768800  |
| H | 0.53633300  | 2.38314200 | 4.12290200  |
| C | -0.24516900 | 1.95385500 | 2.16092000  |
| H | -0.37269300 | 0.89058500 | 2.37043000  |

|    |             |             |             |
|----|-------------|-------------|-------------|
| C  | -3.09580300 | 1.30907000  | 0.03761600  |
| C  | -3.96511800 | 0.56047500  | -0.77257700 |
| H  | -3.56988200 | -0.07540500 | -1.56440000 |
| C  | -5.34328900 | 0.59256100  | -0.55019900 |
| H  | -6.00222400 | 0.00421000  | -1.19106500 |
| C  | -5.86911300 | 1.34239300  | 0.50460200  |
| H  | -6.94648600 | 1.35592000  | 0.68555900  |
| C  | -5.00765500 | 2.06534000  | 1.33590400  |
| H  | -5.40879700 | 2.64700500  | 2.16939400  |
| C  | -3.63048500 | 2.05651500  | 1.10087700  |
| H  | -2.97139900 | 2.63539900  | 1.74874300  |
| C  | 2.53813800  | 1.67628200  | -0.81769900 |
| C  | 2.83295600  | 2.67901000  | -1.75295300 |
| H  | 2.72467000  | 2.49404400  | -2.82194400 |
| C  | 3.28044800  | 3.93275200  | -1.32147100 |
| H  | 3.50030000  | 4.71034800  | -2.05684700 |
| C  | 3.45245200  | 4.18574300  | 0.04130200  |
| H  | 3.80043500  | 5.16575000  | 0.37629600  |
| C  | 3.17598700  | 3.18183200  | 0.97653200  |
| H  | 3.30638300  | 3.37556600  | 2.04273100  |
| C  | 2.71201900  | 1.93728200  | 0.55455500  |
| H  | 2.49484700  | 1.14662300  | 1.27598000  |
| C  | 3.29339300  | -1.11598900 | -1.01799600 |
| C  | 4.57324400  | -0.67360600 | -0.65837400 |
| H  | 4.75814700  | 0.38876200  | -0.49447200 |
| C  | 5.61553800  | -1.59001900 | -0.49476900 |
| H  | 6.60858200  | -1.23374100 | -0.20993700 |
| C  | 5.38959500  | -2.95570700 | -0.69167800 |
| H  | 6.20411300  | -3.67182800 | -0.55866500 |
| C  | 4.11653000  | -3.40080500 | -1.06309100 |
| H  | 3.93198600  | -4.46632400 | -1.21999100 |
| C  | 3.07276200  | -2.48730100 | -1.22362900 |
| H  | 2.07623600  | -2.84523800 | -1.48489600 |
| P  | -1.29652600 | 1.29728000  | -0.33525200 |
| P  | 1.87931300  | 0.03145800  | -1.25797700 |
| Pd | -0.07085800 | -0.65396900 | -0.04308400 |
| C  | -0.39398100 | -3.04023000 | 1.05481500  |
| C  | -1.49091200 | -1.95201700 | 0.96726700  |
| H  | -0.40462500 | -3.58744900 | 2.01376300  |
| H  | -0.53907600 | -3.78286800 | 0.25335700  |
| C  | -1.82367900 | -1.28637200 | 2.23915200  |
| H  | -2.63481400 | -0.55185700 | 2.17199600  |
| C  | -2.63908700 | -2.29944900 | 0.07786600  |
| C  | -2.42765700 | -2.62221500 | -1.28072500 |

|   |             |             |             |
|---|-------------|-------------|-------------|
| C | -3.95728500 | -2.37394300 | 0.56149100  |
| C | -3.48481500 | -2.96761900 | -2.11976400 |
| H | -1.41323500 | -2.57269500 | -1.68335200 |
| C | -5.01979600 | -2.72924500 | -0.27540000 |
| H | -4.15737200 | -2.15279100 | 1.61102200  |
| C | -4.79448000 | -3.01890900 | -1.62183500 |
| H | -3.28886900 | -3.19491000 | -3.17086600 |
| H | -6.03376600 | -2.76930700 | 0.13068300  |
| H | -5.62581300 | -3.28636100 | -2.27843100 |
| C | -1.22286400 | 2.26035200  | -1.91818500 |
| H | -0.18126800 | 2.60858900  | -2.00163600 |
| H | -1.85278200 | 3.15281600  | -1.78951400 |
| C | -1.64274000 | 1.50271700  | -3.18274800 |
| H | -1.63958800 | 2.22444000  | -4.01802200 |
| H | -2.68492300 | 1.16360000  | -3.08720100 |
| C | -0.73513200 | 0.32218500  | -3.53650400 |
| H | -1.16103500 | -0.21000200 | -4.40131000 |
| H | -0.74375100 | -0.40186900 | -2.70555800 |
| C | 0.71280200  | 0.75439300  | -3.84429800 |
| H | 0.83777800  | 1.82621500  | -3.62879900 |
| H | 0.90556800  | 0.65789700  | -4.92495100 |
| C | 1.79742200  | -0.04177700 | -3.11773200 |
| H | 1.67762800  | -1.11627800 | -3.33108700 |
| H | 2.79932800  | 0.23263500  | -3.48480200 |
| C | -1.22648400 | -1.44439600 | 3.43755700  |
| H | -1.54376500 | -0.84859800 | 4.29721300  |
| H | -0.39343100 | -2.13396500 | 3.59380500  |
| N | 0.81968100  | -2.27667400 | 0.82886500  |
| C | 1.74858700  | -2.09515100 | 1.77450100  |
| O | 2.49028800  | -1.12048200 | 1.90472700  |
| O | 1.85506700  | -3.16598800 | 2.63204600  |
| C | 2.83537100  | -3.05223000 | 3.65185800  |
| H | 2.62713000  | -2.19881500 | 4.31667400  |
| H | 2.79411700  | -3.98695600 | 4.22695400  |
| H | 3.84194800  | -2.92043900 | 3.22546300  |

**A5**

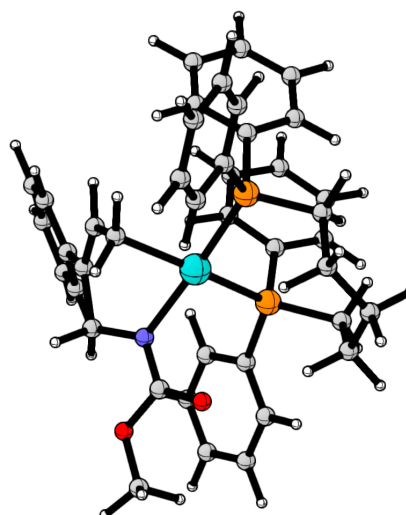

Energy: -2602.97274187

Zero point energy correction: 0.741109

Atom Coordinates:

|   |             |             |             |
|---|-------------|-------------|-------------|
| C | -3.85506200 | -0.50687600 | -0.99147200 |
| C | -3.72680500 | -1.47192000 | -2.00194900 |
| H | -2.76864900 | -1.97800200 | -2.14045500 |
| C | -4.81049900 | -1.77094500 | -2.83152100 |
| H | -4.70200900 | -2.52353700 | -3.61587900 |
| C | -6.02611800 | -1.10013900 | -2.66469500 |
| H | -6.87085100 | -1.32760500 | -3.31915500 |
| C | -6.15797200 | -0.13307500 | -1.66228900 |
| H | -7.10544500 | 0.39491400  | -1.53116200 |
| C | -5.07856700 | 0.16123800  | -0.82578500 |
| H | -5.18726900 | 0.91638100  | -0.04419700 |
| C | -2.64471300 | 1.50407200  | 0.71499200  |
| C | -2.58660400 | 2.52886600  | -0.24566800 |
| H | -2.51513500 | 2.27757900  | -1.30576400 |
| C | -2.61945100 | 3.86688300  | 0.14560300  |
| H | -2.57331700 | 4.65401000  | -0.61044500 |
| C | -2.70304700 | 4.19833500  | 1.50282200  |
| H | -2.71699100 | 5.24627000  | 1.81085200  |
| C | -2.76119100 | 3.18547300  | 2.46178900  |
| H | -2.81764400 | 3.43684000  | 3.52288300  |
| C | -2.73435900 | 1.84359600  | 2.07220800  |
| H | -2.76800700 | 1.06925500  | 2.83822500  |
| C | 2.44781700  | -1.31858400 | 1.37056000  |
| C | 3.32311000  | -0.30286100 | 0.95675800  |
| H | 2.94044200  | 0.69748000  | 0.75316600  |
| C | 4.68557100  | -0.56025700 | 0.79839400  |
| H | 5.35484400  | 0.24370800  | 0.48263100  |

|    |             |             |             |
|----|-------------|-------------|-------------|
| C  | 5.19270400  | -1.84063200 | 1.04447500  |
| H  | 6.25878600  | -2.04373500 | 0.91909900  |
| C  | 4.32603500  | -2.85769600 | 1.45171800  |
| H  | 4.71090100  | -3.86201300 | 1.64400600  |
| C  | 2.96104900  | -2.60104100 | 1.61173800  |
| H  | 2.30199500  | -3.41698600 | 1.90661700  |
| C  | 0.61950700  | 0.69205900  | 2.26837100  |
| C  | 0.62764700  | 1.81574100  | 1.42212500  |
| H  | 0.60819800  | 1.67850600  | 0.33903600  |
| C  | 0.64653700  | 3.10501800  | 1.95377500  |
| H  | 0.65079000  | 3.96475000  | 1.28083800  |
| C  | 0.63296900  | 3.29151500  | 3.33888000  |
| H  | 0.62979500  | 4.30097800  | 3.75649200  |
| C  | 0.61260900  | 2.18176800  | 4.18844200  |
| H  | 0.60069800  | 2.32100800  | 5.27211800  |
| C  | 0.61467800  | 0.88799300  | 3.65783600  |
| H  | 0.61860600  | 0.03575800  | 4.33931300  |
| P  | -2.44696000 | -0.22112000 | 0.14796900  |
| P  | 0.64380200  | -0.97457500 | 1.48808900  |
| Pd | -0.37072700 | -0.69152200 | -0.65819800 |
| C  | 2.15197600  | -0.22585900 | -2.40460700 |
| C  | 1.51230500  | 1.14593800  | -2.37009100 |
| H  | 2.17824400  | -0.57108200 | -3.45826100 |
| H  | 3.20576100  | -0.18049000 | -2.09536000 |
| C  | 0.15119600  | 1.23282300  | -2.45665000 |
| C  | -0.77687700 | 0.10545200  | -2.57418500 |
| H  | -0.30558900 | 2.21572700  | -2.30741200 |
| C  | 2.33976800  | 2.35287000  | -2.15961400 |
| C  | 1.85880900  | 3.64120100  | -2.49440500 |
| C  | 3.62495200  | 2.28821100  | -1.57726600 |
| C  | 2.59411900  | 4.79224300  | -2.21766700 |
| H  | 0.89496900  | 3.74085100  | -2.99603100 |
| C  | 4.36370900  | 3.44088100  | -1.30149300 |
| H  | 4.05299900  | 1.32190800  | -1.31689400 |
| C  | 3.85323400  | 4.70391300  | -1.61137600 |
| H  | 2.18608300  | 5.76888700  | -2.49103400 |
| H  | 5.34901900  | 3.34608500  | -0.83758500 |
| H  | 4.43173200  | 5.60574000  | -1.39809000 |
| H  | -0.47855800 | -0.69378200 | -3.26466800 |
| H  | -1.81623400 | 0.40409000  | -2.74673700 |
| C  | -2.87827100 | -1.29256700 | 1.58157600  |
| H  | -3.90283700 | -1.06797400 | 1.91389800  |
| H  | -2.20982200 | -0.99884700 | 2.39961300  |
| C  | -2.70737300 | -2.78426200 | 1.21531700  |

|   |             |             |             |
|---|-------------|-------------|-------------|
| H | -3.70374700 | -3.21057300 | 1.02448800  |
| H | -2.15456600 | -2.87989500 | 0.26486500  |
| C | 0.09078300  | -2.14174700 | 2.82352100  |
| H | -0.66107200 | -1.62411600 | 3.43523500  |
| H | 0.95655500  | -2.29645300 | 3.48310300  |
| C | -0.45211100 | -3.49324700 | 2.30899300  |
| H | -0.06508200 | -4.28284500 | 2.97295800  |
| H | -0.03887400 | -3.70365600 | 1.30880400  |
| C | -1.98151000 | -3.63268800 | 2.26671800  |
| H | -2.20688000 | -4.69174700 | 2.05854600  |
| H | -2.40015800 | -3.42406000 | 3.26824200  |
| N | 1.42530100  | -1.19570200 | -1.58998900 |
| C | 1.83999400  | -2.45332400 | -1.49286600 |
| O | 1.25510500  | -3.36715400 | -0.89412100 |
| O | 3.03921400  | -2.69382500 | -2.12580900 |
| C | 3.54936000  | -4.01190100 | -2.02072300 |
| H | 2.83668100  | -4.75389600 | -2.41379500 |
| H | 4.47332300  | -4.03473900 | -2.61483700 |
| H | 3.77800400  | -4.27031400 | -0.97538500 |

CO<sub>2</sub>

Energy: -188.446954372

Zero point energy correction: 0.011697

Atom Coordinates:

|   |            |            |             |
|---|------------|------------|-------------|
| C | 0.00000000 | 0.00000000 | 0.00000000  |
| O | 0.00000000 | 0.00000000 | 1.16299500  |
| O | 0.00000000 | 0.00000000 | -1.16299500 |

MsNa (7)

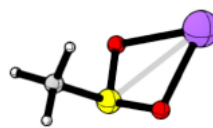

Energy: -750.606124947

Zero point energy correction: 0.045296

Atom Coordinates:

|    |             |             |             |
|----|-------------|-------------|-------------|
| S  | -0.57695400 | -0.00027700 | -0.58163300 |
| O  | 0.26712700  | -1.25016300 | -0.21823200 |
| O  | 0.26688100  | 1.25011100  | -0.21939300 |
| C  | -1.82030600 | 0.00022600  | 0.76944400  |
| H  | -1.25768900 | 0.00072500  | 1.71566800  |
| H  | -2.44230000 | 0.90338800  | 0.68620900  |
| H  | -2.44211700 | -0.90313900 | 0.68705100  |
| Na | 2.03897300  | 0.00045000  | 0.46492500  |

Filename: A1B1C1-10-TS.log

Energy: -3353.57005079

Zero point energy correction: 0.787219

Atom Coordinates:

C -3.52622700 1.58418800 -0.90255000  
C -4.91776000 1.45489600 -0.80098400  
H -5.40049700 1.38460900 0.17428900  
C -5.70843900 1.39783200 -1.95369100  
H -6.79110900 1.28676700 -1.85967900  
C -5.11939300 1.47617700 -3.21752800  
H -5.73909200 1.42869800 -4.11582800  
C -3.72958800 1.60676700 -3.32872100  
H -3.26003100 1.66166700 -4.31344600  
C -2.93935100 1.65001800 -2.18049500  
H -1.85150500 1.71709200 -2.26959900  
C -1.87706300 3.32182400 0.73797700  
C -1.02136400 3.62000300 1.81551800  
H -0.75502000 2.83881900 2.53245100  
C -0.47556800 4.89531400 1.95929300  
H 0.19236600 5.10757000 2.79730000  
C -0.76928200 5.89419000 1.02243500  
H -0.33113400 6.88940700 1.12557800  
C -1.62414200 5.60877800 -0.04506100  
H -1.86245300 6.38354500 -0.77773700  
C -2.17956800 4.33176200 -0.18637000  
H -2.83894100 4.12290500 -1.03003300  
C -2.73409700 -2.60708800 -0.31328400  
C -3.40146100 -3.76946000 0.10753000  
H -2.96749800 -4.40811300 0.87929200  
C -4.62736800 -4.12211900 -0.46164000  
H -5.14278000 -5.02353500 -0.12161800  
C -5.19282900 -3.32726000 -1.46574200  
H -6.15251700 -3.60554800 -1.90764400  
C -4.52641800 -2.17867800 -1.90079800  
H -4.95724200 -1.54963600 -2.68223400  
C -3.30570100 -1.81930900 -1.32263700  
H -2.79660700 -0.91341700 -1.65079600  
C 0.03087000 -3.20294300 -0.53953900  
C 0.01021400 -3.14680600 -1.94514100  
H -0.71044900 -2.50113100 -2.45284800  
C 0.90467600 -3.90464400 -2.69895900  
H 0.87535600 -3.85094100 -3.78983700

C 1.84345300 -4.72390200 -2.06014800  
H 2.55217800 -5.30958400 -2.64988700  
C 1.87349700 -4.78123100 -0.66665800  
H 2.60910300 -5.40982700 -0.15919400  
C 0.97216400 -4.02784400 0.09319500  
H 1.02491500 -4.08124700 1.17927300  
P -2.38360000 1.56563600 0.52748600  
P -1.11064800 -2.09845000 0.38448900  
Pd -0.50705100 0.16382600 0.29039700  
C 2.32449200 -0.53215700 -0.94467300  
C 1.78787400 -0.02253100 0.38833100  
H 2.19845400 -1.62122600 -0.99446500  
H 1.69053000 -0.12775400 -1.75482000  
C 1.40272900 1.35013500 0.51565500  
H 1.38164900 1.80342000 1.50859600  
C 2.14774600 -0.77545900 1.61911000  
C 2.95474100 -1.92966800 1.55671400  
C 1.65928200 -0.39470100 2.89066500  
C 3.24525900 -2.67078400 2.70555500  
H 3.35734900 -2.25982900 0.60154300  
C 1.94845700 -1.13566200 4.03455100  
H 1.00715500 0.47421000 2.98296300  
C 2.74369600 -2.28544200 3.95082500  
H 3.86990000 -3.56375000 2.61967400  
H 1.53997500 -0.81959600 4.99769400  
H 2.96653200 -2.87107800 4.84577900  
C -1.07917700 -2.78593400 2.10329100  
H -0.09123500 -2.49537900 2.49465300  
H -1.08960800 -3.88518800 2.04675300  
C -2.17304200 -2.30036400 3.06821400  
H -1.90796900 -2.69644300 4.06136900  
H -3.13464600 -2.77181100 2.80603800  
C -2.35586400 -0.77469300 3.14750600  
H -1.42895000 -0.28074100 2.80767700  
H -2.49047000 -0.46401700 4.19656400  
C -3.54696500 -0.24561500 2.33387400  
H -4.47850000 -0.43474200 2.89234100  
H -3.64940800 -0.80817300 1.39266200  
C -3.42797600 1.25194500 2.02618100  
H -4.40519200 1.73770800 1.89104200  
H -2.93864500 1.77903700 2.85957800  
N 3.69318600 -0.10217600 -1.12446400  
C 4.66172700 -0.95431700 -1.35938800  
O 5.87267800 -0.63425000 -1.49133000

|    |            |             |             |
|----|------------|-------------|-------------|
| O  | 4.32562600 | -2.29651000 | -1.46231600 |
| C  | 5.38333100 | -3.21066500 | -1.67294600 |
| H  | 5.92572700 | -2.99649900 | -2.60776100 |
| H  | 6.11092300 | -3.19000300 | -0.84523000 |
| H  | 4.92352800 | -4.20699400 | -1.73329100 |
| C  | 1.11798400 | 2.21450900  | -0.55735300 |
| H  | 1.14176500 | 1.86770000  | -1.59054100 |
| H  | 0.57908500 | 3.14108600  | -0.36516000 |
| Na | 5.30742900 | 1.59078300  | -1.01923300 |
| O  | 4.02900700 | 3.31905800  | -2.07969300 |
| S  | 3.21472900 | 3.48100800  | -0.80321100 |
| O  | 4.02739800 | 3.08606700  | 0.42084400  |
| C  | 2.98311900 | 5.28158500  | -0.62640800 |
| H  | 2.40830700 | 5.46464400  | 0.29154800  |
| H  | 3.98740100 | 5.72483800  | -0.56408700 |
| H  | 2.44002700 | 5.65038500  | -1.50692400 |

**B3**

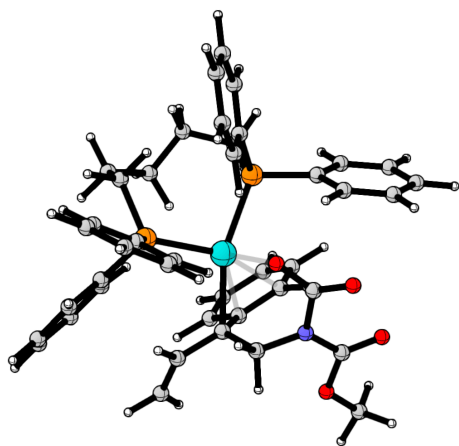

Energy: -2791.40695417

Zero point energy correction: 0.756166

Atom Coordinates:

|   |             |            |            |
|---|-------------|------------|------------|
| C | -2.84880500 | 0.73933100 | 1.51678200 |
| C | -4.13290800 | 1.28825000 | 1.68415500 |
| H | -4.80798400 | 1.39687600 | 0.83334800 |
| C | -4.56912100 | 1.69377600 | 2.94670100 |
| H | -5.56852500 | 2.11943300 | 3.06298900 |
| C | -3.72935200 | 1.55588000 | 4.05765900 |
| H | -4.07062900 | 1.87797500 | 5.04436000 |
| C | -2.45407300 | 1.00838000 | 3.89848100 |
| H | -1.78881900 | 0.90437800 | 4.75889000 |
| C | -2.01268200 | 0.60119200 | 2.63535400 |

|    |             |             |             |
|----|-------------|-------------|-------------|
| H  | -0.99802300 | 0.21597000  | 2.51323400  |
| C  | -3.29115000 | -1.21937600 | -0.59413500 |
| C  | -3.01311300 | -1.88417600 | -1.80113900 |
| H  | -2.18744200 | -1.55082300 | -2.42897200 |
| C  | -3.75981800 | -2.99589000 | -2.19016500 |
| H  | -3.52837100 | -3.49926300 | -3.13172500 |
| C  | -4.78434500 | -3.47583100 | -1.36838800 |
| H  | -5.36206600 | -4.35389000 | -1.66618200 |
| C  | -5.05677100 | -2.83268300 | -0.15832200 |
| H  | -5.84776400 | -3.20679700 | 0.49595200  |
| C  | -4.31821000 | -1.70936700 | 0.22620700  |
| H  | -4.53673700 | -1.22559000 | 1.17833100  |
| C  | 0.24781500  | 3.26142500  | -0.31229400 |
| C  | 0.13458900  | 4.49442900  | -0.97465400 |
| H  | 0.49000800  | 4.61110100  | -1.99976700 |
| C  | -0.43919400 | 5.59058700  | -0.32484200 |
| H  | -0.53172600 | 6.54334200  | -0.85146500 |
| C  | -0.89448500 | 5.46907300  | 0.99236400  |
| H  | -1.34892900 | 6.32631100  | 1.49467500  |
| C  | -0.76111500 | 4.25013400  | 1.66410900  |
| H  | -1.10697700 | 4.14734900  | 2.69535400  |
| C  | -0.19352700 | 3.14991100  | 1.01725300  |
| H  | -0.07286700 | 2.20475600  | 1.54820600  |
| C  | 2.73771800  | 1.88606200  | -0.79954000 |
| C  | 3.17792400  | 1.91762900  | 0.53381600  |
| H  | 2.45530200  | 1.90976900  | 1.34850400  |
| C  | 4.54144400  | 1.90912900  | 0.82859400  |
| H  | 4.85610200  | 1.89864300  | 1.87354400  |
| C  | 5.48553200  | 1.88602500  | -0.20281800 |
| H  | 6.55335500  | 1.87494300  | 0.02810500  |
| C  | 5.05528500  | 1.87225100  | -1.53233000 |
| H  | 5.78459400  | 1.85748800  | -2.34586900 |
| C  | 3.68928400  | 1.86884300  | -1.83265500 |
| H  | 3.38373400  | 1.84150700  | -2.87829100 |
| P  | -2.22051000 | 0.20080000  | -0.12234300 |
| P  | 0.93004400  | 1.75820000  | -1.11245000 |
| Pd | 0.07618200  | -0.27382700 | -0.20023900 |
| C  | 0.73170900  | -2.34242200 | 1.93994100  |
| C  | 0.06311000  | -2.32736200 | 0.54705000  |
| H  | 0.02052800  | -1.89809100 | 2.64732900  |
| H  | 0.82361300  | -3.40270600 | 2.20924900  |
| C  | -1.21255700 | -3.07278200 | 0.72524800  |
| H  | -1.93593700 | -2.56642600 | 1.37094800  |
| C  | 0.81312700  | -2.36502900 | -0.70526900 |

|   |             |             |             |
|---|-------------|-------------|-------------|
| C | 2.00100400  | -1.56751600 | -0.83836300 |
| C | 0.28482600  | -2.93740200 | -1.90992200 |
| C | 2.62519200  | -1.40815700 | -2.09881200 |
| H | 2.52651200  | -1.18887000 | 0.03065300  |
| C | 0.91380200  | -2.76470600 | -3.12485400 |
| H | -0.63843500 | -3.50717700 | -1.86150000 |
| C | 2.09613100  | -1.99585700 | -3.23097800 |
| H | 3.54031900  | -0.81782100 | -2.15374700 |
| H | 0.48490700  | -3.22358200 | -4.01895400 |
| H | 2.58541800  | -1.87411200 | -4.19977700 |
| C | 2.02216800  | -0.29876500 | 2.54296000  |
| O | 1.01818400  | 0.31597200  | 2.08034000  |
| O | 2.93012700  | 0.12958400  | 3.24657100  |
| C | -2.82296300 | 1.55538400  | -1.25203000 |
| H | -2.18097000 | 2.42396700  | -1.03945300 |
| H | -3.83426800 | 1.82378400  | -0.91688400 |
| C | -2.86518300 | 1.23442600  | -2.74932300 |
| H | -3.33952200 | 2.09233300  | -3.25703600 |
| H | -3.53982200 | 0.38192500  | -2.91800100 |
| C | -1.50667000 | 0.96752300  | -3.40160200 |
| H | -1.67261600 | 0.57089200  | -4.41535600 |
| H | -0.97721600 | 0.17103900  | -2.85294500 |
| C | -0.61634100 | 2.22435400  | -3.47490200 |
| H | -1.10065500 | 3.06035400  | -2.94668700 |
| H | -0.53024000 | 2.55586200  | -4.52154900 |
| C | 0.80304900  | 2.04193300  | -2.93341800 |
| H | 1.27489500  | 1.16013900  | -3.39713400 |
| H | 1.42820200  | 2.91082800  | -3.18887200 |
| C | -1.50378700 | -4.31659200 | 0.32845400  |
| H | -2.46092400 | -4.77036100 | 0.59642200  |
| H | -0.81553600 | -4.92308400 | -0.26506700 |
| N | 2.02599400  | -1.72047100 | 2.16206700  |
| C | 3.19471000  | -2.41135900 | 1.94419200  |
| O | 4.31540300  | -1.94711400 | 1.93012900  |
| O | 2.94704400  | -3.71737100 | 1.66849300  |
| C | 4.08063200  | -4.49807900 | 1.29986100  |
| H | 4.82485700  | -4.52124200 | 2.10921800  |
| H | 3.70232100  | -5.50892500 | 1.10531500  |
| H | 4.55565900  | -4.09188900 | 0.39418900  |

**TS-B2**

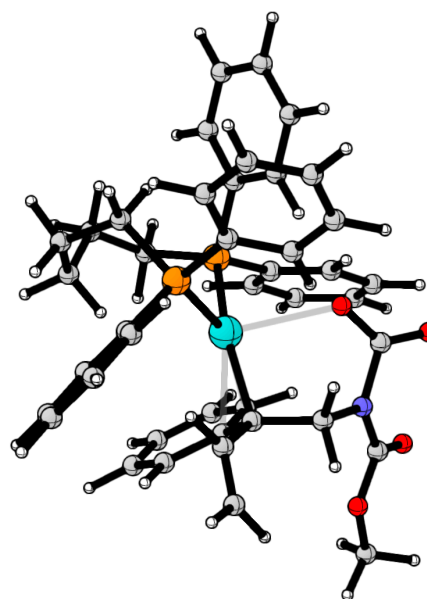

Energy: -2791.40407475

Zero point energy correction: 0.755709

Atom Coordinates:

|   |             |             |             |
|---|-------------|-------------|-------------|
| C | 2.88721300  | 0.56869900  | -1.51374500 |
| C | 4.18165100  | 1.09166400  | -1.68361900 |
| H | 4.85485800  | 1.20481800  | -0.83215600 |
| C | 4.63116600  | 1.46739100  | -2.95081300 |
| H | 5.63861900  | 1.87305000  | -3.06894900 |
| C | 3.79446000  | 1.32579000  | -4.06346900 |
| H | 4.14619800  | 1.62498200  | -5.05370400 |
| C | 2.50833500  | 0.80494500  | -3.90119400 |
| H | 1.84443900  | 0.70035100  | -4.76255800 |
| C | 2.05387400  | 0.42737300  | -2.63381500 |
| H | 1.02935900  | 0.07074400  | -2.50904600 |
| C | 3.24820300  | -1.38355400 | 0.61854600  |
| C | 2.91541100  | -2.04744900 | 1.81480500  |
| H | 2.07992600  | -1.69463700 | 2.42015300  |
| C | 3.61279400  | -3.18756000 | 2.21293300  |
| H | 3.33855800  | -3.69153900 | 3.14244100  |
| C | 4.64285900  | -3.69536200 | 1.41340400  |
| H | 5.18127300  | -4.59558200 | 1.71821700  |
| C | 4.97038700  | -3.05203100 | 0.21744800  |
| H | 5.76555500  | -3.44817900 | -0.41832300 |
| C | 4.27976700  | -1.90163100 | -0.17846400 |
| H | 4.53799100  | -1.42052500 | -1.12184900 |
| C | 0.01370000  | 3.24913300  | 0.25575800  |
| C | 0.24911900  | 4.47605300  | 0.89694900  |
| H | -0.08337600 | 4.64239400  | 1.92281200  |
| C | 0.91835000  | 5.50245700  | 0.22470700  |

|    |             |             |             |
|----|-------------|-------------|-------------|
| H  | 1.10651200  | 6.44991000  | 0.73513300  |
| C  | 1.34796900  | 5.31741300  | -1.09359400 |
| H  | 1.87910700  | 6.11870400  | -1.61276000 |
| C  | 1.09031400  | 4.10749600  | -1.74518800 |
| H  | 1.41478000  | 3.95612600  | -2.77736900 |
| C  | 0.42538100  | 3.07699000  | -1.07699500 |
| H  | 0.20864100  | 2.14077000  | -1.59329800 |
| C  | -2.58298600 | 2.10490800  | 0.75663200  |
| C  | -3.01386000 | 2.09780300  | -0.57970400 |
| H  | -2.29169200 | 1.96892500  | -1.38455800 |
| C  | -4.37059200 | 2.20563100  | -0.88665700 |
| H  | -4.67947600 | 2.15929300  | -1.93233900 |
| C  | -5.31541200 | 2.34106500  | 0.13520300  |
| H  | -6.37837800 | 2.42121300  | -0.10434800 |
| C  | -4.89261800 | 2.36789500  | 1.46697600  |
| H  | -5.62218200 | 2.47627300  | 2.27316400  |
| C  | -3.53472900 | 2.24713500  | 1.77990500  |
| H  | -3.23776000 | 2.25413400  | 2.82825300  |
| P  | 2.23454800  | 0.07085000  | 0.12761500  |
| P  | -0.79395600 | 1.82754000  | 1.08823300  |
| Pd | -0.08554900 | -0.29930500 | 0.24840900  |
| C  | -0.87783500 | -2.33310100 | -1.89732000 |
| C  | -0.26508800 | -2.38375300 | -0.48542100 |
| H  | -0.12248300 | -1.91398300 | -2.57161500 |
| H  | -1.02087600 | -3.37816600 | -2.19838200 |
| C  | 0.88063600  | -3.35073100 | -0.50833900 |
| H  | 1.87471800  | -2.97260800 | -0.28048600 |
| C  | -1.03773700 | -2.28944100 | 0.74098000  |
| C  | -2.09744100 | -1.32447400 | 0.85994100  |
| C  | -0.61809700 | -2.95681000 | 1.94095100  |
| C  | -2.70276800 | -1.08834600 | 2.12238400  |
| H  | -2.58610200 | -0.90752700 | -0.01479300 |
| C  | -1.22052200 | -2.69751200 | 3.15112300  |
| H  | 0.18626800  | -3.68818600 | 1.87178000  |
| C  | -2.27079800 | -1.75070700 | 3.25215000  |
| H  | -3.52970100 | -0.37997900 | 2.17654700  |
| H  | -0.88814300 | -3.23217000 | 4.04419700  |
| H  | -2.74516700 | -1.56377600 | 4.21798500  |
| C  | -2.03561100 | -0.22452400 | -2.55137100 |
| O  | -0.98191600 | 0.32923100  | -2.12820900 |
| O  | -2.93427800 | 0.24759700  | -3.23981600 |
| C  | 2.90240000  | 1.39729000  | 1.25392300  |
| H  | 2.30651400  | 2.29722000  | 1.04005400  |
| H  | 3.92591700  | 1.61120800  | 0.91766100  |

|   |             |             |             |
|---|-------------|-------------|-------------|
| C | 2.93043700  | 1.07823600  | 2.75178200  |
| H | 3.46299700  | 1.90465200  | 3.25386300  |
| H | 3.54730900  | 0.18345100  | 2.92218300  |
| C | 1.56061900  | 0.90717200  | 3.41211000  |
| H | 1.70588200  | 0.51398900  | 4.43028300  |
| H | 0.97796200  | 0.13939400  | 2.87648800  |
| C | 0.75629100  | 2.22150200  | 3.47203800  |
| H | 1.30970500  | 3.02323700  | 2.95876200  |
| H | 0.67057000  | 2.55489700  | 4.51812300  |
| C | -0.66180400 | 2.14520000  | 2.90316200  |
| H | -1.21673500 | 1.31949700  | 3.37835800  |
| H | -1.21244500 | 3.07106300  | 3.12746000  |
| C | 0.74794100  | -4.64742500 | -0.80967300 |
| H | 1.61705700  | -5.31066400 | -0.82812500 |
| H | -0.22561600 | -5.09784900 | -1.02927600 |
| N | -2.12798900 | -1.63430500 | -2.13252800 |
| C | -3.33369100 | -2.24543800 | -1.88346300 |
| O | -4.42638300 | -1.71898800 | -1.87902200 |
| O | -3.15796000 | -3.55491000 | -1.56609000 |
| C | -4.33073600 | -4.25801300 | -1.16594900 |
| H | -5.08190500 | -4.26366400 | -1.96923900 |
| H | -4.00890700 | -5.28234200 | -0.94241300 |
| H | -4.77488000 | -3.79829000 | -0.27019500 |

#### B4

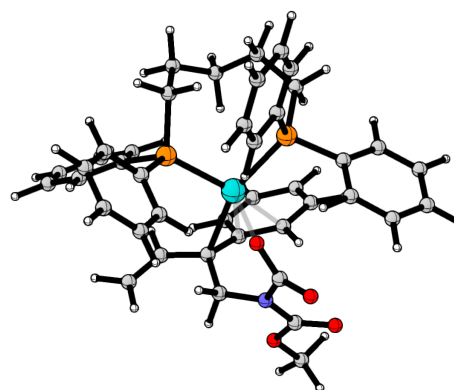

Energy: -2791.41273905

Zero point energy correction: 0.757133

Atom Coordinates:

|   |             |            |            |
|---|-------------|------------|------------|
| C | -2.85182600 | 0.58227100 | 1.51571800 |
| C | -4.14133100 | 1.10298500 | 1.72576700 |
| H | -4.81919800 | 1.26898700 | 0.88653900 |
| C | -4.57873200 | 1.40591000 | 3.01645300 |
| H | -5.58244900 | 1.81019600 | 3.16673800 |

|    |             |             |             |   |             |             |             |
|----|-------------|-------------|-------------|---|-------------|-------------|-------------|
| C  | -3.73419100 | 1.19358100  | 4.11196200  | H | 0.04639400  | -1.96086500 | 2.54480600  |
| H  | -4.07661300 | 1.43523100  | 5.12100500  | H | 0.83247400  | -3.48277300 | 2.12751400  |
| C  | -2.45226600 | 0.67658000  | 3.90901800  | C | -1.14417900 | -3.13510600 | 0.41791500  |
| H  | -1.78251500 | 0.51710600  | 4.75735400  | H | -1.61054100 | -3.23342800 | -0.55896400 |
| C  | -2.01033200 | 0.37081900  | 2.61801700  | C | 0.92332900  | -2.35380100 | -0.77337900 |
| H  | -0.99097000 | 0.01108100  | 2.46438700  | C | 2.02869600  | -1.43756800 | -0.87154000 |
| C  | -3.29059200 | -1.19972600 | -0.74982600 | C | 0.52350300  | -3.01972700 | -1.97873600 |
| C  | -2.99544500 | -1.77994600 | -1.99808800 | C | 2.67179400  | -1.22509600 | -2.11784800 |
| H  | -2.14915100 | -1.41889100 | -2.58331400 | H | 2.51492000  | -1.03844000 | 0.01216200  |
| C  | -3.74371300 | -2.85418900 | -2.47901600 | C | 1.16919700  | -2.79056200 | -3.17434400 |
| H  | -3.49751600 | -3.29280500 | -3.44869900 | H | -0.28970100 | -3.74261000 | -1.94535400 |
| C  | -4.79118400 | -3.37901900 | -1.71324400 | C | 2.24638700  | -1.87577700 | -3.25715000 |
| H  | -5.37182200 | -4.22657000 | -2.08437600 | H | 3.52468900  | -0.54707800 | -2.15087500 |
| C  | -5.08098800 | -2.81948500 | -0.46701500 | H | 0.84948200  | -3.33084500 | -4.06865500 |
| H  | -5.88728500 | -3.23096200 | 0.14464300  | H | 2.75010500  | -1.70936000 | -4.21169500 |
| C  | -4.33624100 | -1.73707200 | 0.01317400  | C | 2.04840500  | -0.40639300 | 2.52684500  |
| H  | -4.56526700 | -1.32685300 | 0.99638700  | O | 1.02780400  | 0.21783100  | 2.12010900  |
| C  | 0.19365600  | 3.24700500  | -0.14953500 | O | 2.97892900  | -0.00134800 | 3.21583600  |
| C  | 0.06036500  | 4.51982000  | -0.72778500 | C | -2.82555800 | 1.61108000  | -1.18174100 |
| H  | 0.40819600  | 4.71026800  | -1.74435400 | H | -2.17417300 | 2.45795700  | -0.91895700 |
| C  | -0.52497300 | 5.56194700  | -0.00369700 | H | -3.82923600 | 1.86150200  | -0.81188500 |
| H  | -0.63297300 | 6.54642500  | -0.46489800 | C | -2.89273600 | 1.39654200  | -2.69646500 |
| C  | -0.97203700 | 5.34600100  | 1.30410300  | H | -3.37043000 | 2.28976900  | -3.13525900 |
| H  | -1.43602900 | 6.16105600  | 1.86452100  | H | -3.57338700 | 0.56047400  | -2.91518800 |
| C  | -0.81706700 | 4.08731900  | 1.89267700  | C | -1.54575800 | 1.17275500  | -3.38794400 |
| H  | -1.15470600 | 3.91150200  | 2.91673800  | H | -1.73067200 | 0.84783600  | -4.42358800 |
| C  | -0.23662600 | 3.04096500  | 1.17214000  | H | -1.01005000 | 0.33834900  | -2.90562100 |
| H  | -0.09485800 | 2.06636600  | 1.64028300  | C | -0.65248000 | 2.42970200  | -3.38965800 |
| C  | 2.70452700  | 1.96634000  | -0.73622000 | H | -1.14048600 | 3.23793900  | -2.82299000 |
| C  | 3.14591100  | 1.90591800  | 0.59541300  | H | -0.55849600 | 2.81456900  | -4.41716000 |
| H  | 2.42443800  | 1.81183300  | 1.40568600  | C | 0.76458700  | 2.22186600  | -2.85184100 |
| C  | 4.50956000  | 1.91698700  | 0.89005600  | H | 1.24922400  | 1.37984700  | -3.37305400 |
| H  | 4.82443400  | 1.83197300  | 1.93148100  | H | 1.38057200  | 3.11307400  | -3.04443100 |
| C  | 5.45184000  | 2.00829300  | -0.13904400 | C | -1.81048300 | -3.65844400 | 1.46274800  |
| H  | 6.51992000  | 2.01341800  | 0.09087500  | H | -2.77154700 | -4.15006700 | 1.29980500  |
| C  | 5.01972400  | 2.08721300  | -1.46580100 | H | -1.45441500 | -3.61206700 | 2.49334500  |
| H  | 5.74761500  | 2.16125600  | -2.27733400 | N | 2.05147800  | -1.81232500 | 2.08587600  |
| C  | 3.65411800  | 2.06254600  | -1.76686200 | C | 3.21614100  | -2.49126000 | 1.82073500  |
| H  | 3.34850100  | 2.10671300  | -2.81185100 | O | 4.33769600  | -2.02917000 | 1.81070500  |
| P  | -2.22136000 | 0.17505700  | -0.15814300 | O | 2.96098400  | -3.78447600 | 1.49288700  |
| P  | 0.89886100  | 1.81559600  | -1.05457100 | C | 4.08695500  | -4.55206500 | 1.07760900  |
| Pd | 0.08305800  | -0.28976900 | -0.28143300 | H | 4.83791700  | -4.61770900 | 1.87852500  |
| C  | 0.75514000  | -2.42290700 | 1.85045600  | H | 3.70193300  | -5.55082800 | 0.83864700  |
| C  | 0.12985000  | -2.40185100 | 0.45064600  | H | 4.55715300  | -4.10614400 | 0.18822100  |



TS-B3

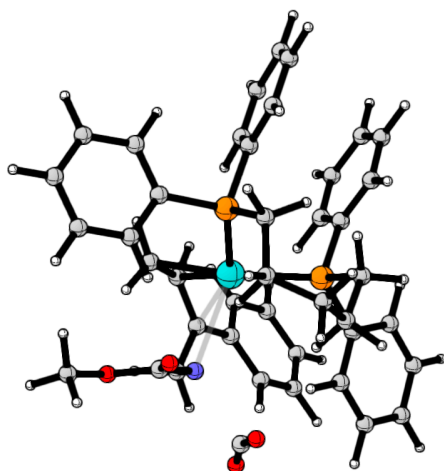

Energy: -2791.40604521

Zero point energy correction: 0.754219

Atom Coordinates:

|   |             |             |             |
|---|-------------|-------------|-------------|
| C | -3.77798300 | -0.46965200 | -0.24781100 |
| C | -3.85508300 | -1.86384000 | -0.08019400 |
| H | -3.04888400 | -2.40957500 | 0.41837000  |
| C | -4.95557000 | -2.56330600 | -0.57955500 |
| H | -5.01778800 | -3.64456300 | -0.43527000 |
| C | -5.97129700 | -1.89107600 | -1.26928500 |
| H | -6.82551600 | -2.44547800 | -1.66490300 |
| C | -5.88444300 | -0.50934700 | -1.45458200 |
| H | -6.66920300 | 0.02263900  | -1.99776300 |
| C | -4.79467500 | 0.20246000  | -0.94125700 |
| H | -4.74029500 | 1.28283200  | -1.08326700 |
| C | -2.63251300 | 2.17115900  | 0.07414600  |
| C | -2.05238500 | 2.70112700  | -1.08957500 |
| H | -1.41334600 | 2.06951700  | -1.70816300 |
| C | -2.26539400 | 4.03332500  | -1.44218300 |
| H | -1.79870800 | 4.43512000  | -2.34337300 |
| C | -3.05010100 | 4.85629800  | -0.62904200 |
| H | -3.20571300 | 5.90360600  | -0.89793800 |
| C | -3.62607500 | 4.33916700  | 0.53450200  |
| H | -4.23889300 | 4.97829000  | 1.17440600  |
| C | -3.42338100 | 3.00116800  | 0.88432500  |
| H | -3.89190600 | 2.61161100  | 1.78918100  |
| C | 2.80764900  | 0.61578500  | 1.30849800  |
| C | 3.78753300  | 1.61668900  | 1.22144100  |
| H | 3.50561900  | 2.64464600  | 0.99088300  |

|    |             |             |             |
|----|-------------|-------------|-------------|
| C  | 5.13244400  | 1.30047100  | 1.42959400  |
| H  | 5.88870000  | 2.08518200  | 1.35139000  |
| C  | 5.51171300  | -0.00958700 | 1.73890900  |
| H  | 6.56481000  | -0.25124200 | 1.90056500  |
| C  | 4.53982900  | -1.00955600 | 1.82855100  |
| H  | 4.82414500  | -2.04031200 | 2.05086500  |
| C  | 3.19845900  | -0.69715000 | 1.60455800  |
| H  | 2.43864000  | -1.47227500 | 1.65657500  |
| C  | 0.95180500  | 2.67275400  | 0.51954800  |
| C  | 1.45274100  | 2.90028000  | -0.77548700 |
| H  | 1.89603500  | 2.07798200  | -1.34079400 |
| C  | 1.39697100  | 4.17298200  | -1.34083100 |
| H  | 1.79635100  | 4.33618000  | -2.34462900 |
| C  | 0.82327400  | 5.23261400  | -0.62844000 |
| H  | 0.76761300  | 6.22764600  | -1.07573000 |
| C  | 0.31145700  | 5.01022200  | 0.65107600  |
| H  | -0.14903400 | 5.82950400  | 1.20733800  |
| C  | 0.37947500  | 3.73770800  | 1.22749900  |
| H  | -0.02574600 | 3.58726900  | 2.22841700  |
| P  | -2.33612300 | 0.40982000  | 0.47094500  |
| P  | 1.00895900  | 0.95643700  | 1.14994600  |
| Pd | -0.31023100 | -0.32096200 | -0.32036400 |
| C  | 1.22768800  | -2.66914900 | -1.60985600 |
| C  | 1.29716300  | -1.22314300 | -2.10278700 |
| H  | 0.70027500  | -3.24975500 | -2.38212300 |
| H  | 2.24336500  | -3.08118000 | -1.56120800 |
| C  | 0.12378400  | -0.58045900 | -2.51739200 |
| C  | -1.18245400 | -1.02910300 | -2.17201200 |
| H  | 0.20508700  | 0.41572000  | -2.95914700 |
| C  | 2.61686800  | -0.58648600 | -2.31013600 |
| C  | 2.79406000  | 0.49623900  | -3.20089100 |
| C  | 3.74685100  | -1.03032800 | -1.59242200 |
| C  | 4.03138000  | 1.12191000  | -3.34251100 |
| H  | 1.95829900  | 0.84952700  | -3.80587300 |
| C  | 4.98426400  | -0.40188800 | -1.73372400 |
| H  | 3.65359800  | -1.85999700 | -0.89511400 |
| C  | 5.13500100  | 0.68020900  | -2.60403800 |
| H  | 4.13646900  | 1.95579400  | -4.04079500 |
| H  | 5.83301900  | -0.75609300 | -1.14618200 |
| H  | 6.10417800  | 1.17261300  | -2.71206700 |
| C  | 2.05551300  | -3.70876500 | 1.12324100  |
| O  | 1.46799400  | -3.70114500 | 2.14401600  |
| H  | -1.39023100 | -2.09192000 | -2.03515400 |
| H  | -2.03077500 | -0.44310800 | -2.53156700 |

|   |             |             |             |
|---|-------------|-------------|-------------|
| C | -2.66588200 | 0.26478300  | 2.28819500  |
| H | -3.75763500 | 0.31349000  | 2.41130000  |
| H | -2.26872300 | 1.17498300  | 2.75547900  |
| C | -2.08927200 | -1.00803800 | 2.94983300  |
| H | -2.92613700 | -1.56437200 | 3.39895600  |
| H | -1.65584500 | -1.68955200 | 2.19882200  |
| C | 0.50635700  | 1.03952600  | 2.92695700  |
| H | -0.43324400 | 1.60206600  | 2.98270400  |
| H | 1.25977300  | 1.64340200  | 3.45329800  |
| C | 0.36128800  | -0.36472900 | 3.56476700  |
| H | 1.05032600  | -0.42480400 | 4.42081400  |
| H | 0.69493100  | -1.14776300 | 2.86695300  |
| C | -1.04474000 | -0.74625900 | 4.04505100  |
| H | -0.94322700 | -1.67182500 | 4.63550100  |
| H | -1.42351900 | 0.02092000  | 4.74527600  |
| O | 2.96931900  | -3.89587500 | 0.39697400  |
| N | 0.59820100  | -2.79830700 | -0.30283000 |
| C | -0.50503100 | -3.54748300 | -0.16525600 |
| O | -1.20072300 | -3.63472000 | 0.85139900  |
| O | -0.86907500 | -4.27528700 | -1.28859300 |
| C | -2.01191200 | -5.10661300 | -1.17285700 |
| H | -2.93693300 | -4.51302700 | -1.11473900 |
| H | -2.03791400 | -5.72701800 | -2.07925600 |
| H | -1.95369900 | -5.74740200 | -0.28058700 |

**B5**

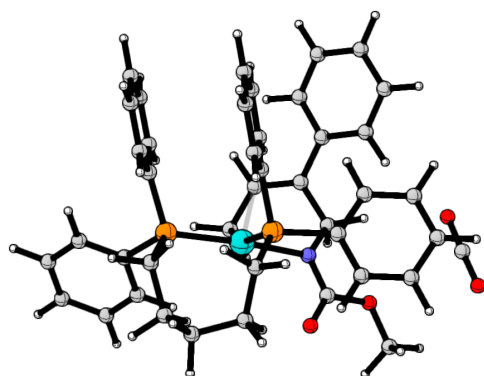

Zero point energy correction: 0.754017

Atom Coordinates:

|   |             |             |             |
|---|-------------|-------------|-------------|
| C | -3.96460200 | -1.23237700 | -1.04830900 |
| C | -3.60996500 | -2.34280600 | -1.82942800 |
| H | -2.58053100 | -2.70748000 | -1.80615200 |
| C | -4.56126400 | -2.96634700 | -2.64060100 |
| H | -4.27630900 | -3.83091500 | -3.24451100 |
| C | -5.87058500 | -2.47748900 | -2.68678700 |

|    |             |             |             |
|----|-------------|-------------|-------------|
| H  | -6.61232600 | -2.95936700 | -3.32807100 |
| C  | -6.22853000 | -1.36723400 | -1.91452300 |
| H  | -7.24993100 | -0.98107400 | -1.95017600 |
| C  | -5.28160400 | -0.74849300 | -1.09463000 |
| H  | -5.56751400 | 0.11689400  | -0.49276500 |
| C  | -3.21239500 | 1.23520600  | 0.28359900  |
| C  | -3.25419000 | 2.04854100  | -0.86215900 |
| H  | -3.08668800 | 1.60931500  | -1.84753700 |
| C  | -3.51196700 | 3.41454000  | -0.75012600 |
| H  | -3.54157400 | 4.03573600  | -1.64821900 |
| C  | -3.72572900 | 3.98651000  | 0.50913900  |
| H  | -3.91781500 | 5.05811000  | 0.59847000  |
| C  | -3.68593200 | 3.18419600  | 1.65091800  |
| H  | -3.84243800 | 3.62523900  | 2.63738900  |
| C  | -3.43139000 | 1.81449500  | 1.54147700  |
| H  | -3.38922200 | 1.21045000  | 2.44775000  |
| C  | 2.17994600  | -0.52724500 | 1.76916500  |
| C  | 2.94614600  | 0.59386600  | 1.41656300  |
| H  | 2.45837900  | 1.51998000  | 1.11344800  |
| C  | 4.34151900  | 0.53940000  | 1.45418100  |
| H  | 4.92176000  | 1.42346400  | 1.18047200  |
| C  | 4.98981500  | -0.63683000 | 1.84138900  |
| H  | 6.08061500  | -0.67902900 | 1.87906200  |
| C  | 4.23208500  | -1.76417400 | 2.17307900  |
| H  | 4.72976400  | -2.69295500 | 2.46165300  |
| C  | 2.83706500  | -1.71189500 | 2.13912300  |
| H  | 2.26630700  | -2.60800200 | 2.37750800  |
| C  | -0.00490800 | 1.28698400  | 2.12510200  |
| C  | -0.05990100 | 2.21345800  | 1.06821800  |
| H  | 0.06330000  | 1.86702000  | 0.04079500  |
| C  | -0.27732600 | 3.56733100  | 1.32093700  |
| H  | -0.31497200 | 4.27030100  | 0.48648700  |
| C  | -0.46668100 | 4.01150600  | 2.63286800  |
| H  | -0.65441400 | 5.06911600  | 2.83214200  |
| C  | -0.42562100 | 3.09689600  | 3.68904900  |
| H  | -0.57456500 | 3.43899300  | 4.71602300  |
| C  | -0.18675100 | 1.74164100  | 3.43968300  |
| H  | -0.13823800 | 1.04717600  | 4.28016600  |
| P  | -2.71891900 | -0.51253900 | 0.08936800  |
| P  | 0.34031800  | -0.46813600 | 1.70022500  |
| Pd | -0.53593600 | -0.78656300 | -0.49516600 |
| C  | 1.97760600  | -0.30578900 | -2.23094000 |
| C  | 1.17686600  | 0.96963400  | -2.39120800 |
| H  | 1.98735300  | -0.83416300 | -3.20571800 |

|   |             |             |             |
|---|-------------|-------------|-------------|
| H | 3.02892800  | -0.09673000 | -2.00465300 |
| C | -0.17380300 | 0.83972100  | -2.56216500 |
| C | -0.90554900 | -0.42667700 | -2.55699400 |
| H | -0.78611100 | 1.74554900  | -2.55913000 |
| C | 1.80538700  | 2.29208400  | -2.20171800 |
| C | 1.14098600  | 3.48805600  | -2.56638900 |
| C | 3.06745900  | 2.43064500  | -1.58345000 |
| C | 1.68121500  | 4.74068900  | -2.28355000 |
| H | 0.18342300  | 3.43652100  | -3.08676300 |
| C | 3.61016700  | 3.68663900  | -1.30210500 |
| H | 3.63356400  | 1.54683500  | -1.29968900 |
| C | 2.92018500  | 4.85328800  | -1.63970100 |
| H | 1.13372600  | 5.64021200  | -2.57723700 |
| H | 4.58442100  | 3.74845500  | -0.80982200 |
| H | 3.34413500  | 5.83557000  | -1.41865900 |
| C | 5.87214500  | -1.05814000 | -1.21306300 |
| O | 6.30445900  | -2.05283700 | -0.79521400 |
| H | -0.42654000 | -1.26948500 | -3.07136800 |
| H | -1.96008800 | -0.33994100 | -2.83767600 |
| C | -3.12215200 | -1.34287500 | 1.68199200  |
| H | -4.19315200 | -1.21168600 | 1.89718300  |
| H | -2.57682500 | -0.79944400 | 2.46220800  |
| C | -2.72315200 | -2.83572500 | 1.64426500  |
| H | -3.63928900 | -3.43604300 | 1.53870000  |
| H | -2.12363700 | -3.04830100 | 0.74256000  |
| C | -0.14662200 | -1.44988100 | 3.20072100  |
| H | -1.01346400 | -0.95592600 | 3.66121300  |
| H | 0.67575600  | -1.35115500 | 3.92362300  |
| C | -0.44647900 | -2.93833000 | 2.91156200  |
| H | 0.02770600  | -3.53496500 | 3.70700200  |
| H | 0.04077500  | -3.23970600 | 1.96944100  |
| C | -1.93119200 | -3.33066200 | 2.86099700  |
| H | -1.97723400 | -4.43236900 | 2.86250800  |
| H | -2.43296400 | -3.00504900 | 3.79059100  |
| O | 5.46986900  | -0.05305000 | -1.63780400 |
| N | 1.38958200  | -1.17663800 | -1.21001400 |
| C | 1.93557700  | -2.34119000 | -0.88686000 |
| O | 1.43307000  | -3.19510400 | -0.14165100 |
| O | 3.17494000  | -2.56869500 | -1.45420900 |
| C | 3.74919300  | -3.83898000 | -1.18120800 |
| H | 3.05228300  | -4.65285900 | -1.43166400 |
| H | 4.65201400  | -3.91240600 | -1.80027800 |
| H | 4.02749100  | -3.93302500 | -0.12013000 |

C2

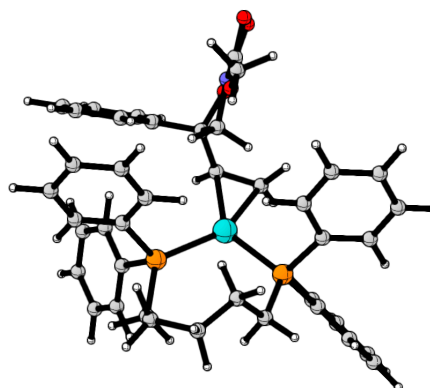

Energy: -2791.41631493

Zero point energy correction: 0.755888

Atom Coordinates:

|   |             |             |             |
|---|-------------|-------------|-------------|
| C | 3.10407500  | 1.79001300  | 0.41176200  |
| C | 2.02785800  | 2.47847900  | 1.00441100  |
| H | 1.15765900  | 1.92085900  | 1.35231100  |
| C | 2.04458800  | 3.86785600  | 1.12760400  |
| H | 1.19244800  | 4.37885600  | 1.58092200  |
| C | 3.13756500  | 4.59925000  | 0.64870900  |
| H | 3.14970800  | 5.68835400  | 0.73336700  |
| C | 4.20690500  | 3.92827300  | 0.04990400  |
| H | 5.06018000  | 4.49218000  | -0.33490800 |
| C | 4.19220300  | 2.53359500  | -0.06911900 |
| H | 5.03114800  | 2.02968600  | -0.55058700 |
| C | 4.36976300  | -0.55108100 | -0.79820000 |
| C | 4.12871400  | -1.06913000 | -2.08047200 |
| H | 3.09937700  | -1.14330700 | -2.43689000 |
| C | 5.18810300  | -1.49289100 | -2.88841900 |
| H | 4.98499000  | -1.89437100 | -3.88398100 |
| C | 6.50208200  | -1.40749600 | -2.42018500 |
| H | 7.33129000  | -1.73988900 | -3.04923000 |
| C | 6.75350200  | -0.89924000 | -1.14085300 |
| H | 7.77886300  | -0.83315900 | -0.76930600 |
| C | 5.69506100  | -0.47497200 | -0.33428900 |
| H | 5.90979200  | -0.07816000 | 0.66001900  |
| C | -1.66477000 | -1.34730500 | 1.95295700  |
| C | -2.79608200 | -2.11645800 | 2.26182500  |
| H | -2.86726700 | -3.14751800 | 1.91101400  |
| C | -3.84531900 | -1.56496100 | 3.00189400  |
| H | -4.72740300 | -2.17040500 | 3.22340300  |
| C | -3.77331300 | -0.24297400 | 3.45329000  |

|    |             |             |             |
|----|-------------|-------------|-------------|
| H  | -4.59873300 | 0.18695500  | 4.02521100  |
| C  | -2.63998200 | 0.52561900  | 3.16923900  |
| H  | -2.57276400 | 1.55972800  | 3.51419600  |
| C  | -1.59621700 | -0.02531600 | 2.42261600  |
| H  | -0.71888800 | 0.58113400  | 2.19251600  |
| C  | -0.92692300 | -3.36531100 | -0.00577700 |
| C  | -2.08495500 | -3.13502900 | -0.77052500 |
| H  | -2.60189800 | -2.17973200 | -0.69637500 |
| C  | -2.57776900 | -4.11743500 | -1.62892000 |
| H  | -3.48333400 | -3.91711600 | -2.20581900 |
| C  | -1.91257600 | -5.34301100 | -1.75510200 |
| H  | -2.29545500 | -6.11002300 | -2.43241500 |
| C  | -0.75316900 | -5.57596100 | -1.01203600 |
| H  | -0.22241300 | -6.52651000 | -1.10634200 |
| C  | -0.26360600 | -4.59607000 | -0.14058000 |
| H  | 0.64647600  | -4.80207200 | 0.42487100  |
| P  | 2.92695000  | -0.03602300 | 0.21536000  |
| P  | -0.22528300 | -1.99411100 | 1.00337600  |
| Pd | 0.76664300  | -0.50314700 | -0.53138400 |
| C  | -1.39847400 | 1.90870500  | -0.52310800 |
| C  | -1.74653800 | 0.98840300  | -1.69472800 |
| H  | -1.72550600 | 1.51271900  | 0.43746100  |
| H  | -0.31720400 | 2.08524000  | -0.46642400 |
| C  | -0.61603700 | 0.08755200  | -2.12106600 |
| C  | 0.68671500  | 0.59214700  | -2.35631400 |
| H  | -0.93275800 | -0.80173500 | -2.67213700 |
| C  | -3.06170400 | 0.23044000  | -1.54472800 |
| C  | -3.56057900 | -0.44681700 | -2.67152400 |
| C  | -3.79777000 | 0.18028000  | -0.35609800 |
| C  | -4.74249000 | -1.18235700 | -2.60079100 |
| H  | -3.01354600 | -0.39411700 | -3.61437700 |
| C  | -4.98437500 | -0.55829700 | -0.28204300 |
| H  | -3.45252400 | 0.69325100  | 0.53857500  |
| C  | -5.45717700 | -1.24810500 | -1.39851000 |
| H  | -5.10771900 | -1.70816400 | -3.48609000 |
| H  | -5.53008500 | -0.59615700 | 0.66251900  |
| H  | -6.37932700 | -1.83059300 | -1.33728300 |
| C  | -2.34865300 | 3.18972400  | -2.24811500 |
| O  | -2.77142400 | 4.11424400  | -2.88917600 |
| H  | 0.91075500  | 1.65416500  | -2.21063600 |
| H  | 1.31166200  | 0.10818700  | -3.11295900 |
| C  | 3.34610600  | -0.72269200 | 1.88371200  |
| H  | 4.36970300  | -0.45274100 | 2.18403600  |
| H  | 3.33982000  | -1.81225600 | 1.72273300  |

|   |             |             |             |
|---|-------------|-------------|-------------|
| C | 2.34122300  | -0.32510700 | 2.97550200  |
| H | 2.70838900  | 0.58129000  | 3.47969100  |
| H | 1.38186200  | -0.03735700 | 2.51765200  |
| C | 0.66692800  | -2.95819200 | 2.35536200  |
| H | 1.64031300  | -3.27452100 | 1.94926000  |
| H | 0.06670200  | -3.87134500 | 2.48427700  |
| C | 0.82704100  | -2.29111900 | 3.73647000  |
| H | 0.81111900  | -3.09848500 | 4.48708100  |
| H | -0.06669900 | -1.68346200 | 3.94960600  |
| C | 2.07942900  | -1.44354400 | 3.99856600  |
| H | 1.96675800  | -1.00497800 | 5.00348500  |
| H | 2.96700200  | -2.09785000 | 4.05660200  |
| O | -2.00750800 | 2.00288400  | -2.77357800 |
| N | -2.09927900 | 3.13977600  | -0.86687800 |
| C | -2.28405500 | 4.18964600  | 0.01741800  |
| O | -2.83042200 | 5.23847900  | -0.22026800 |
| O | -1.75879800 | 3.85474200  | 1.21293600  |
| C | -1.89578900 | 4.82542000  | 2.25320200  |
| H | -1.42531700 | 4.38389500  | 3.13915900  |
| H | -1.38807700 | 5.76142500  | 1.97938100  |
| H | -2.95672400 | 5.03644800  | 2.45020000  |

#### TS-C1

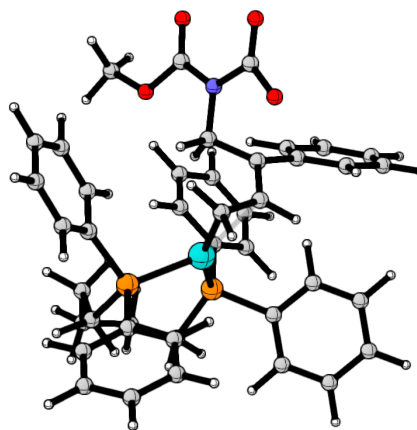

Energy: -2791.40880706

Zero point energy correction: 0.756338

Atom Coordinates:

|   |            |            |             |
|---|------------|------------|-------------|
| C | 3.31069000 | 2.42500600 | 0.22626800  |
| C | 2.59497400 | 3.40719500 | 0.93481900  |
| H | 1.78942200 | 3.11750100 | 1.61330300  |
| C | 2.89101500 | 4.75921000 | 0.75921600  |
| H | 2.33066500 | 5.51272700 | 1.31724900  |
| C | 3.89206000 | 5.14836000 | -0.13865000 |

|    |             |             |             |   |             |             |             |
|----|-------------|-------------|-------------|---|-------------|-------------|-------------|
| H  | 4.11816700  | 6.20741300  | -0.28136300 | H | -1.21352000 | 2.89924800  | -0.82902100 |
| C  | 4.59225300  | 4.17800400  | -0.85900600 | C | -0.27337400 | 0.82984600  | -2.11229000 |
| H  | 5.36790200  | 4.47500000  | -1.56863600 | C | 0.84034400  | 1.65289000  | -1.78775700 |
| C  | 4.30499400  | 2.82055600  | -0.67968400 | H | -0.09912600 | -0.00270000 | -2.79828300 |
| H  | 4.85622800  | 2.07353600  | -1.25239200 | C | -2.51660200 | -0.17232000 | -1.70897200 |
| C  | 4.00677800  | -0.32947800 | -0.49681600 | C | -2.54127200 | -0.88468300 | -2.92388200 |
| C  | 3.54019600  | -1.12349100 | -1.55542600 | C | -3.48071000 | -0.49125600 | -0.73481500 |
| H  | 2.47836400  | -1.12253700 | -1.80657500 | C | -3.46239100 | -1.91029900 | -3.13482800 |
| C  | 4.42513500  | -1.93262800 | -2.27338100 | H | -1.84612900 | -0.62280900 | -3.72196300 |
| H  | 4.04801800  | -2.55260900 | -3.08930300 | C | -4.39190800 | -1.52677800 | -0.93808700 |
| C  | 5.78105900  | -1.95563700 | -1.93835600 | H | -3.49915400 | 0.05287100  | 0.20488500  |
| H  | 6.47256400  | -2.58969800 | -2.49797300 | C | -4.38331900 | -2.24705000 | -2.13672000 |
| C  | 6.25366700  | -1.16838800 | -0.88149800 | H | -3.46353800 | -2.44737900 | -4.08612100 |
| H  | 7.31312000  | -1.18542300 | -0.61619900 | H | -5.10852000 | -1.77159300 | -0.15166100 |
| C  | 5.37274700  | -0.35933100 | -0.16238400 | H | -5.09843600 | -3.05683200 | -2.29855900 |
| H  | 5.75498400  | 0.25357000  | 0.65656900  | C | -3.65190700 | 2.74874700  | -2.23884700 |
| C  | -1.62316900 | -1.84806100 | 1.77202200  | O | -4.84460200 | 2.91491200  | -2.48704900 |
| C  | -2.22328400 | -3.11745600 | 1.78242100  | H | 0.69890800  | 2.64634100  | -1.35403400 |
| H  | -1.69386900 | -3.97717800 | 1.36800200  | H | 1.75032400  | 1.54607900  | -2.38266900 |
| C  | -3.50480200 | -3.28513400 | 2.30842800  | C | 3.23525300  | 0.29868800  | 2.21684700  |
| H  | -3.96949100 | -4.27368400 | 2.29881200  | H | 4.20998400  | 0.74820600  | 2.45811100  |
| C  | -4.19121800 | -2.19136800 | 2.84693400  | H | 3.38861100  | -0.78831000 | 2.22836200  |
| H  | -5.19464800 | -2.32309000 | 3.25799700  | C | 2.15728300  | 0.72254800  | 3.23434900  |
| C  | -3.59245800 | -0.92946100 | 2.85575000  | H | 2.47647800  | 1.65841100  | 3.71603700  |
| H  | -4.12683300 | -0.07469400 | 3.27131000  | H | 1.21044700  | 0.95756400  | 2.71790700  |
| C  | -2.31591600 | -0.75535400 | 2.31400400  | C | 1.04992100  | -2.20973300 | 2.63626600  |
| H  | -1.86866700 | 0.24044000  | 2.29577200  | H | 2.11283500  | -2.27202500 | 2.36834800  |
| C  | 0.34501000  | -2.90154500 | -0.10224600 | H | 0.70476500  | -3.24573500 | 2.77351300  |
| C  | -0.64372500 | -3.11556200 | -1.07977200 | C | 0.83555700  | -1.40606300 | 3.93672100  |
| H  | -1.60212300 | -2.60293300 | -1.00918100 | H | 0.78514100  | -2.12765700 | 4.76728700  |
| C  | -0.40414500 | -3.98170000 | -2.14653600 | H | -0.15746300 | -0.92862700 | 3.91399600  |
| H  | -1.18260800 | -4.13301500 | -2.89757900 | C | 1.88519100  | -0.34707200 | 4.30352900  |
| C  | 0.82461100  | -4.64329600 | -2.25488100 | H | 1.53472300  | 0.14701300  | 5.22405100  |
| H  | 1.01240100  | -5.31828000 | -3.09300100 | H | 2.83674000  | -0.83974300 | 4.57060600  |
| C  | 1.81071600  | -4.43547200 | -1.28677000 | O | -2.65593500 | 2.70955800  | -2.98781700 |
| H  | 2.77453200  | -4.94316300 | -1.36605300 | N | -3.27001800 | 2.50571400  | -0.80136400 |
| C  | 1.57519900  | -3.56802000 | -0.21621100 | C | -4.10742900 | 2.74729100  | 0.25373500  |
| H  | 2.36716100  | -3.40258000 | 0.51507500  | O | -5.20823900 | 3.25520300  | 0.22860600  |
| P  | 2.82148000  | 0.67721300  | 0.46006500  | O | -3.54915000 | 2.34352500  | 1.44358700  |
| P  | 0.08584300  | -1.59960200 | 1.16165000  | C | -4.31254000 | 2.63590500  | 2.60690100  |
| Pd | 0.63691800  | 0.29835100  | -0.15080300 | H | -3.70123100 | 2.31759700  | 3.46083100  |
| C  | -1.89395600 | 2.07158200  | -0.58922000 | H | -4.52691600 | 3.71228900  | 2.68113400  |
| C  | -1.50408900 | 0.87237800  | -1.44651200 | H | -5.26840700 | 2.09054000  | 2.60309600  |
| H  | -1.76493000 | 1.84267300  | 0.47248600  |   |             |             |             |

A6

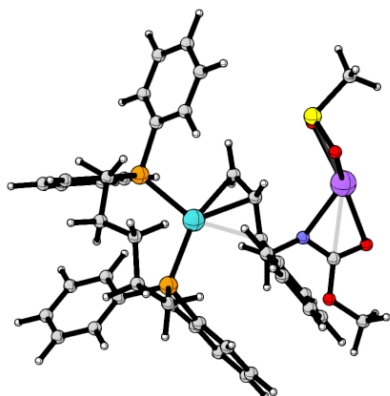

Energy: -3353.58437342

Zero point energy correction: 0.787422

Atom Coordinates:

|   |             |             |             |
|---|-------------|-------------|-------------|
| C | -3.40886000 | 1.66636700  | -1.01751300 |
| C | -4.80005300 | 1.57007400  | -0.88205400 |
| H | -5.26498100 | 1.55644800  | 0.10399000  |
| C | -5.61297200 | 1.47182900  | -2.01591300 |
| H | -6.69540400 | 1.38737300  | -1.89717100 |
| C | -5.04556100 | 1.47305100  | -3.29182300 |
| H | -5.68269500 | 1.39310300  | -4.17540600 |
| C | -3.65592500 | 1.56873600  | -3.43510200 |
| H | -3.20454100 | 1.56552800  | -4.42961600 |
| C | -2.84255200 | 1.65761700  | -2.30592300 |
| H | -1.75720800 | 1.71005000  | -2.42277000 |
| C | -1.69623500 | 3.47663300  | 0.47081800  |
| C | -0.73897600 | 3.81025200  | 1.44617100  |
| H | -0.36594400 | 3.04280600  | 2.13036600  |
| C | -0.23012300 | 5.10590300  | 1.52377800  |
| H | 0.52595800  | 5.34711000  | 2.27393800  |
| C | -0.67279900 | 6.08624800  | 0.62720300  |
| H | -0.26804700 | 7.09940500  | 0.68026400  |
| C | -1.62843200 | 5.76269700  | -0.33852400 |
| H | -1.97810000 | 6.52393500  | -1.03980000 |
| C | -2.14118400 | 4.46267000  | -0.41878500 |
| H | -2.88287900 | 4.22058000  | -1.18118400 |
| C | -2.96230300 | -2.36987400 | 0.01538700  |
| C | -3.75540200 | -3.37943300 | 0.58562700  |
| H | -3.40623300 | -3.93347000 | 1.45829200  |
| C | -5.00094100 | -3.68811600 | 0.03465000  |
| H | -5.61526300 | -4.46812600 | 0.49033200  |
| C | -5.45824300 | -3.00759500 | -1.09961800 |

|    |             |             |             |
|----|-------------|-------------|-------------|
| H  | -6.43234000 | -3.25336600 | -1.52875200 |
| C  | -4.66579100 | -2.01528900 | -1.68209300 |
| H  | -5.01140600 | -1.47780200 | -2.56662700 |
| C  | -3.42678300 | -1.69382100 | -1.12190300 |
| H  | -2.81924200 | -0.90750900 | -1.56923300 |
| C  | -0.27385500 | -3.23337200 | -0.18155100 |
| C  | -0.39400900 | -3.38197400 | -1.57503900 |
| H  | -1.11475700 | -2.77904000 | -2.13050500 |
| C  | 0.40581900  | -4.29422700 | -2.26138300 |
| H  | 0.30281100  | -4.39632800 | -3.34406400 |
| C  | 1.34180300  | -5.07019200 | -1.56723900 |
| H  | 1.97394200  | -5.78014900 | -2.10526700 |
| C  | 1.46763400  | -4.92579300 | -0.18524900 |
| H  | 2.20343500  | -5.51645600 | 0.36494700  |
| C  | 0.66576900  | -4.01275300 | 0.50748300  |
| H  | 0.79836600  | -3.90915300 | 1.58317200  |
| P  | -2.25480100 | 1.72768500  | 0.39826000  |
| P  | -1.29597400 | -1.95828800 | 0.66222000  |
| Pd | -0.45116800 | 0.21885100  | 0.22440000  |
| C  | 2.03777100  | -0.94857600 | -1.29505100 |
| C  | 1.78602200  | -0.41934800 | 0.11974900  |
| H  | 2.02959400  | -2.04618500 | -1.28251500 |
| H  | 1.19792100  | -0.65591700 | -1.95072900 |
| C  | 1.59924800  | 0.97706900  | 0.30470700  |
| H  | 1.87265500  | 1.42740300  | 1.26081400  |
| C  | 2.32175600  | -1.18750600 | 1.27469300  |
| C  | 3.22452000  | -2.25184600 | 1.09402100  |
| C  | 1.93460500  | -0.87061800 | 2.59419900  |
| C  | 3.71685300  | -2.96786900 | 2.18789700  |
| H  | 3.54605200  | -2.52752000 | 0.09128700  |
| C  | 2.41761800  | -1.59256500 | 3.68464100  |
| H  | 1.21482300  | -0.06812700 | 2.76615500  |
| C  | 3.31303400  | -2.65041900 | 3.48694500  |
| H  | 4.41719400  | -3.78935800 | 2.01791600  |
| H  | 2.08552800  | -1.33433500 | 4.69308300  |
| H  | 3.68992700  | -3.22075800 | 4.33912800  |
| C  | -1.27480500 | -2.50738000 | 2.42711300  |
| H  | -0.24840900 | -2.28708500 | 2.75946800  |
| H  | -1.38404600 | -3.60216600 | 2.44783800  |
| C  | -2.27364600 | -1.85129800 | 3.39170300  |
| H  | -1.97043900 | -2.15372000 | 4.40638000  |
| H  | -3.27793300 | -2.27924200 | 3.23916600  |
| C  | -2.35405900 | -0.32075900 | 3.30180000  |
| H  | -1.39355200 | 0.07437200  | 2.92709700  |

|    |             |             |             |
|----|-------------|-------------|-------------|
| H  | -2.47921200 | 0.11230600  | 4.30724900  |
| C  | -3.50431300 | 0.18077200  | 2.41596600  |
| H  | -4.44610200 | 0.12482700  | 2.98570400  |
| H  | -3.64983800 | -0.48478700 | 1.55203900  |
| C  | -3.28453400 | 1.61481200  | 1.93275300  |
| H  | -4.22481000 | 2.15286000  | 1.74398100  |
| H  | -2.74908100 | 2.20133400  | 2.69455300  |
| N  | 3.27159200  | -0.36782800 | -1.76617700 |
| C  | 4.33116000  | -1.08786900 | -2.05208100 |
| O  | 5.46226500  | -0.60738200 | -2.30663700 |
| O  | 4.18349400  | -2.46929400 | -2.06000600 |
| C  | 5.35294700  | -3.23482500 | -2.28498800 |
| H  | 5.81941700  | -2.98775400 | -3.25146100 |
| H  | 6.10298800  | -3.07313200 | -1.49322400 |
| H  | 5.04039200  | -4.28879200 | -2.28318700 |
| C  | 0.88932600  | 1.75487600  | -0.61602900 |
| H  | 0.83435800  | 1.46600400  | -1.66808700 |
| H  | 0.71626700  | 2.80649800  | -0.39911900 |
| Na | 4.62743300  | 1.47019300  | -1.32967700 |
| O  | 3.57776200  | 3.54411200  | -1.41624400 |
| S  | 3.53071000  | 3.69643200  | 0.12308300  |
| O  | 4.25984100  | 2.48105600  | 0.74913500  |
| C  | 4.76336900  | 5.03068400  | 0.39196700  |
| H  | 4.89734500  | 5.18577200  | 1.47264600  |
| H  | 5.70203900  | 4.69096100  | -0.07187200 |
| H  | 4.40425100  | 5.95349100  | -0.08688700 |

#### TS-A4

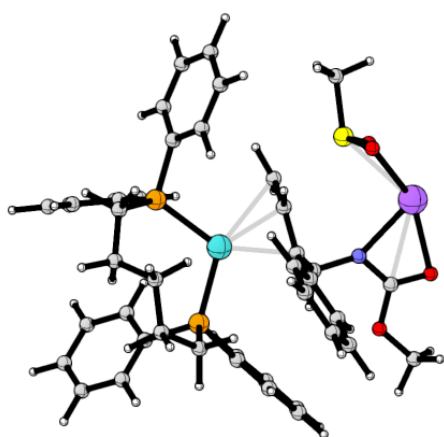

Energy: -3353.57005079

Zero point energy correction: 0.787219

Atom Coordinates:

|   |             |            |             |
|---|-------------|------------|-------------|
| C | -3.52622700 | 1.58418800 | -0.90255000 |
| C | -4.91776000 | 1.45489600 | -0.80098400 |

|   |             |             |             |
|---|-------------|-------------|-------------|
| H | -5.40049700 | 1.38460900  | 0.17428900  |
| C | -5.70843900 | 1.39783200  | -1.95369100 |
| H | -6.79110900 | 1.28676700  | -1.85967900 |
| C | -5.11939300 | 1.47617700  | -3.21752800 |
| H | -5.73909200 | 1.42869800  | -4.11582800 |
| C | -3.72958800 | 1.60676700  | -3.32872100 |
| H | -3.26003100 | 1.66166700  | -4.31344600 |
| C | -2.93935100 | 1.65001800  | -2.18049500 |
| H | -1.85150500 | 1.71709200  | -2.26959900 |
| C | -1.87706300 | 3.32182400  | 0.73797700  |
| C | -1.02136400 | 3.62000300  | 1.81551800  |
| H | -0.75502000 | 2.83881900  | 2.53245100  |
| C | -0.47556800 | 4.89531400  | 1.95929300  |
| H | 0.19236600  | 5.10757000  | 2.79730000  |
| C | -0.76928200 | 5.89419000  | 1.02243500  |
| H | -0.33113400 | 6.88940700  | 1.12557800  |
| C | -1.62414200 | 5.60877800  | -0.04506100 |
| H | -1.86245300 | 6.38354500  | -0.77773700 |
| C | -2.17956800 | 4.33176200  | -0.18637000 |
| H | -2.83894100 | 4.12290500  | -1.03003300 |
| C | -2.73409700 | -2.60708800 | -0.31328400 |
| C | -3.40146100 | -3.76946000 | 0.10753000  |
| H | -2.96749800 | -4.40811300 | 0.87929200  |
| C | -4.62736800 | -4.12211900 | -0.46164000 |
| H | -5.14278000 | -5.02353500 | -0.12161800 |
| C | -5.19282900 | -3.32726000 | -1.46574200 |
| H | -6.15251700 | -3.60554800 | -1.90764400 |
| C | -4.52641800 | -2.17867800 | -1.90079800 |
| H | -4.95724200 | -1.54963600 | -2.68223400 |
| C | -3.30570100 | -1.81930900 | -1.32263700 |
| H | -2.79660700 | -0.91341700 | -1.65079600 |
| C | 0.03087000  | -3.20294300 | -0.53953900 |
| C | 0.01021400  | -3.14680600 | -1.94514100 |
| H | -0.71044900 | -2.50113100 | -2.45284800 |
| C | 0.90467600  | -3.90464400 | -2.69895900 |
| H | 0.87535600  | -3.85094100 | -3.78983700 |
| C | 1.84345300  | -4.72390200 | -2.06014800 |
| H | 2.55217800  | -5.30958400 | -2.64988700 |
| C | 1.87349700  | -4.78123100 | -0.66665800 |
| H | 2.60910300  | -5.40982700 | -0.15919400 |
| C | 0.97216400  | -4.02784400 | 0.09319500  |
| H | 1.02491500  | -4.08124700 | 1.17927300  |
| P | -2.38360000 | 1.56563600  | 0.52748600  |
| P | -1.11064800 | -2.09845000 | 0.38448900  |

|    |             |             |             |
|----|-------------|-------------|-------------|
| Pd | -0.50705100 | 0.16382600  | 0.29039700  |
| C  | 2.32449200  | -0.53215700 | -0.94467300 |
| C  | 1.78787400  | -0.02253100 | 0.38833100  |
| H  | 2.19845400  | -1.62122600 | -0.99446500 |
| H  | 1.69053000  | -0.12775400 | -1.75482000 |
| C  | 1.40272900  | 1.35013500  | 0.51565500  |
| H  | 1.38164900  | 1.80342000  | 1.50859600  |
| C  | 2.14774600  | -0.77545900 | 1.61911000  |
| C  | 2.95474100  | -1.92966800 | 1.55671400  |
| C  | 1.65928200  | -0.39470100 | 2.89066500  |
| C  | 3.24525900  | -2.67078400 | 2.70555500  |
| H  | 3.35734900  | -2.25982900 | 0.60154300  |
| C  | 1.94845700  | -1.13566200 | 4.03455100  |
| H  | 1.00715500  | 0.47421000  | 2.98296300  |
| C  | 2.74369600  | -2.28544200 | 3.95082500  |
| H  | 3.86990000  | -3.56375000 | 2.61967400  |
| H  | 1.53997500  | -0.81959600 | 4.99769400  |
| H  | 2.96653200  | -2.87107800 | 4.84577900  |
| C  | -1.07917700 | -2.78593400 | 2.10329100  |
| H  | -0.09123500 | -2.49537900 | 2.49465300  |
| H  | -1.08960800 | -3.88518800 | 2.04675300  |
| C  | -2.17304200 | -2.30036400 | 3.06821400  |
| H  | -1.90796900 | -2.69644300 | 4.06136900  |
| H  | -3.13464600 | -2.77181100 | 2.80603800  |
| C  | -2.35586400 | -0.77469300 | 3.14750600  |
| H  | -1.42895000 | -0.28074100 | 2.80767700  |
| H  | -2.49047000 | -0.46401700 | 4.19656400  |
| C  | -3.54696500 | -0.24561500 | 2.33387400  |
| H  | -4.47850000 | -0.43474200 | 2.89234100  |
| H  | -3.64940800 | -0.80817300 | 1.39266200  |
| C  | -3.42797600 | 1.25194500  | 2.02618100  |
| H  | -4.40519200 | 1.73770800  | 1.89104200  |
| H  | -2.93864500 | 1.77903700  | 2.85957800  |
| N  | 3.69318600  | -0.10217600 | -1.12446400 |
| C  | 4.66172700  | -0.95431700 | -1.35938800 |
| O  | 5.87267800  | -0.63425000 | -1.49133000 |
| O  | 4.32562600  | -2.29651000 | -1.46231600 |
| C  | 5.38333100  | -3.21066500 | -1.67294600 |
| H  | 5.92572700  | -2.99649900 | -2.60776100 |
| H  | 6.11092300  | -3.19000300 | -0.84523000 |
| H  | 4.92352800  | -4.20699400 | -1.73329100 |
| C  | 1.11798400  | 2.21450900  | -0.55735300 |
| H  | 1.14176500  | 1.86770000  | -1.59054100 |
| H  | 0.57908500  | 3.14108600  | -0.36516000 |

|    |            |            |             |
|----|------------|------------|-------------|
| Na | 5.30742900 | 1.59078300 | -1.01923300 |
| O  | 4.02900700 | 3.31905800 | -2.07969300 |
| S  | 3.21472900 | 3.48100800 | -0.80321100 |
| O  | 4.02739800 | 3.08606700 | 0.42084400  |
| C  | 2.98311900 | 5.28158500 | -0.62640800 |
| H  | 2.40830700 | 5.46464400 | 0.29154800  |
| H  | 3.98740100 | 5.72483800 | -0.56408700 |
| H  | 2.44002700 | 5.65038500 | -1.50692400 |

A7

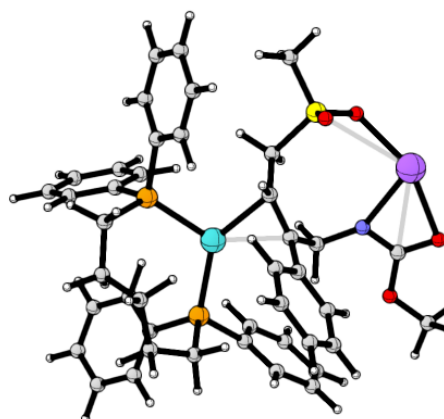

Energy: -3353.58676698

Zero point energy correction: 0.789735

Atom Coordinates:

|   |             |            |             |
|---|-------------|------------|-------------|
| C | -3.49426500 | 1.38483400 | -0.87454200 |
| C | -4.87023900 | 1.15815100 | -0.73314100 |
| H | -5.32253700 | 1.08769800 | 0.25647500  |
| C | -5.68323100 | 0.99997900 | -1.86099200 |
| H | -6.75161800 | 0.81066300 | -1.73308400 |
| C | -5.13431800 | 1.07708500 | -3.14276500 |
| H | -5.77050400 | 0.94990800 | -4.02163000 |
| C | -3.76171500 | 1.30959900 | -3.29540800 |
| H | -3.32214700 | 1.36538300 | -4.29399600 |
| C | -2.94858900 | 1.45056400 | -2.17112000 |
| H | -1.87140800 | 1.59290400 | -2.29421700 |
| C | -1.92800300 | 3.25633700 | 0.68339700  |
| C | -1.05244000 | 3.63998000 | 1.71746100  |
| H | -0.67923900 | 2.88963000 | 2.41862100  |
| C | -0.63887500 | 4.96533100 | 1.84871400  |
| H | 0.04590200  | 5.24228800 | 2.65339600  |
| C | -1.08803600 | 5.93346500 | 0.94169400  |
| H | -0.76000200 | 6.97088100 | 1.03883300  |
| C | -1.95422800 | 5.56280500 | -0.09053600 |
| H | -2.30872400 | 6.31175500 | -0.80286600 |



|    |             |             |             |    |             |             |             |
|----|-------------|-------------|-------------|----|-------------|-------------|-------------|
| C  | -2.37334100 | 4.23365500  | -0.21992500 | C  | -0.87253000 | -2.85249300 | 2.10427500  |
| H  | -3.04971100 | 3.95892800  | -1.03073100 | H  | 0.09359800  | -2.49191600 | 2.49299500  |
| C  | -2.54222600 | -2.88554700 | -0.28632000 | H  | -0.81830400 | -3.95211500 | 2.08275000  |
| C  | -3.02611600 | -4.15158100 | 0.08339200  | C  | -2.00290000 | -2.40536700 | 3.04486000  |
| H  | -2.46081300 | -4.77481700 | 0.77975400  | H  | -1.76026400 | -2.80979100 | 4.04074500  |
| C  | -4.23071000 | -4.62763500 | -0.43889100 | H  | -2.94513700 | -2.89523700 | 2.74619300  |
| H  | -4.60144500 | -5.61102200 | -0.13928600 | C  | -2.21815600 | -0.88306900 | 3.14068500  |
| C  | -4.96047900 | -3.84990100 | -1.34644700 | H  | -1.30686400 | -0.36799400 | 2.79117400  |
| H  | -5.90273100 | -4.22475300 | -1.75350400 | H  | -2.34417400 | -0.58484900 | 4.19480600  |
| C  | -4.48007200 | -2.59496600 | -1.72903100 | C  | -3.42709200 | -0.36325700 | 2.34761400  |
| H  | -5.04042800 | -1.97799500 | -2.43463700 | H  | -4.35036700 | -0.56748300 | 2.91518100  |
| C  | -3.27907200 | -2.11475000 | -1.19633100 | H  | -3.53040000 | -0.92147300 | 1.40350300  |
| H  | -2.91244800 | -1.12862300 | -1.48146600 | C  | -3.32884200 | 1.13923500  | 2.04761800  |
| C  | 0.25572500  | -3.26777500 | -0.52933200 | H  | -4.31335700 | 1.61746900  | 1.93811300  |
| C  | 0.22989600  | -3.25099500 | -1.93616900 | H  | -2.82345000 | 1.66371200  | 2.87350700  |
| H  | -0.54248300 | -2.67785200 | -2.45604900 | N  | 3.80152900  | 0.08822700  | -1.11920500 |
| C  | 1.18254600  | -3.95089900 | -2.67500700 | C  | 4.81317100  | -0.72961200 | -1.27742700 |
| H  | 1.14622700  | -3.92799400 | -3.76702000 | O  | 6.01370500  | -0.35971600 | -1.38331700 |
| C  | 2.18788300  | -4.67353000 | -2.02033200 | O  | 4.53871900  | -2.08747400 | -1.32915000 |
| H  | 2.94228400  | -5.21261400 | -2.59796200 | C  | 5.64044200  | -2.96396700 | -1.45412500 |
| C  | 2.22369200  | -4.69256700 | -0.62570100 | H  | 6.22767400  | -2.75277000 | -2.36203600 |
| H  | 3.00982900  | -5.24496600 | -0.10509500 | H  | 6.31823600  | -2.89447900 | -0.58720200 |
| C  | 1.26365000  | -3.99747300 | 0.11810000  | H  | 5.22355200  | -3.97910800 | -1.51196500 |
| H  | 1.32314900  | -4.01597600 | 1.20517900  | C  | 1.22219000  | 2.41554400  | -0.84454000 |
| P  | -2.31176100 | 1.46036200  | 0.52679800  | H  | 1.34426500  | 1.95059700  | -1.82922600 |
| P  | -0.95500100 | -2.20730900 | 0.36491800  | H  | 0.31174700  | 3.03148300  | -0.83697200 |
| Pd | -0.45594400 | 0.08599500  | 0.27464400  | Na | 5.25779500  | 1.86930300  | -1.22568800 |
| C  | 2.44190100  | -0.38165800 | -0.97126100 | O  | 3.64458700  | 3.38991300  | -1.74975700 |
| C  | 1.82659400  | 0.17998900  | 0.30222400  | S  | 2.57316600  | 3.68367900  | -0.75395300 |
| H  | 2.35724500  | -1.47677500 | -0.97062800 | O  | 2.99434400  | 3.84582300  | 0.65469300  |
| H  | 1.82919200  | -0.04531400 | -1.82834100 | C  | 1.79166200  | 5.20690400  | -1.29057500 |
| C  | 1.26022600  | 1.47729200  | 0.31723300  | H  | 0.98096900  | 5.45015000  | -0.59307900 |
| H  | 1.19532300  | 2.00603400  | 1.26919700  | H  | 2.58030700  | 5.97033500  | -1.26614500 |
| C  | 2.17898800  | -0.48402800 | 1.58966200  | H  | 1.41522500  | 5.06626400  | -2.31179200 |
| C  | 2.99216700  | -1.63665300 | 1.61450200  |    |             |             |             |
| C  | 1.68215000  | -0.02459900 | 2.83298900  |    |             |             |             |
| C  | 3.26376900  | -2.30892700 | 2.80987600  |    |             |             |             |
| H  | 3.41140300  | -2.02435800 | 0.68871700  |    |             |             |             |
| C  | 1.95288800  | -0.69660500 | 4.02297400  |    |             |             |             |
| H  | 1.03916100  | 0.85467500  | 2.86819100  |    |             |             |             |
| C  | 2.74347100  | -1.85307400 | 4.02316800  |    |             |             |             |
| H  | 3.89009300  | -3.20500100 | 2.78537800  |    |             |             |             |
| H  | 1.53407300  | -0.31840200 | 4.95933200  |    |             |             |             |
| H  | 2.95079300  | -2.38469700 | 4.95489600  |    |             |             |             |

**DI**

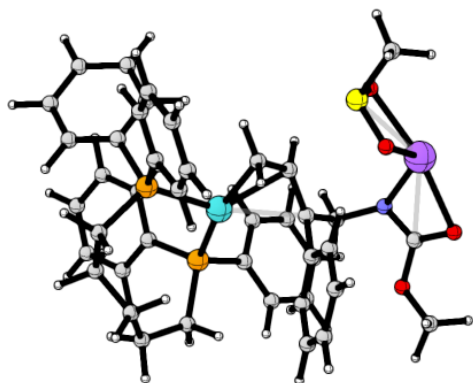

Energy: -3353.58429891

Zero point energy correction: 0.787684

Atom Coordinates:

|    |             |             |             |
|----|-------------|-------------|-------------|
| C  | -3.20000500 | 2.02070300  | -0.66772700 |
| C  | -4.59385500 | 2.06185400  | -0.52955700 |
| H  | -5.06116400 | 1.95761000  | 0.44966800  |
| C  | -5.41007100 | 2.22154100  | -1.65394700 |
| H  | -6.49532600 | 2.24246500  | -1.53295700 |
| C  | -4.84326800 | 2.34515400  | -2.92398900 |
| H  | -5.48307500 | 2.46711100  | -3.80079800 |
| C  | -3.45160300 | 2.30286200  | -3.07083500 |
| H  | -3.00024400 | 2.39279900  | -4.06128600 |
| C  | -2.63633100 | 2.13401000  | -1.95208800 |
| H  | -1.55300900 | 2.07721100  | -2.07650200 |
| C  | -1.33051300 | 3.41698700  | 1.05680200  |
| C  | -0.37560700 | 3.52006700  | 2.08376500  |
| H  | -0.08886800 | 2.63219500  | 2.65442100  |
| C  | 0.22629200  | 4.74547800  | 2.36902100  |
| H  | 0.96866000  | 4.81164600  | 3.16758300  |
| C  | -0.11210200 | 5.88217300  | 1.62511300  |
| H  | 0.36489700  | 6.84055900  | 1.84221800  |
| C  | -1.05874400 | 5.78517800  | 0.60270300  |
| H  | -1.32779900 | 6.66883500  | 0.01932300  |
| C  | -1.66935900 | 4.55844100  | 0.31849500  |
| H  | -2.40724700 | 4.49590200  | -0.48254000 |
| C  | -3.22335400 | -2.13481800 | -0.28628800 |
| C  | -4.14497200 | -3.10553700 | 0.13947800  |
| H  | -3.88343100 | -3.81243000 | 0.92821600  |
| C  | -5.40855000 | -3.18043100 | -0.45035200 |
| H  | -6.12202200 | -3.93272400 | -0.10608500 |
| C  | -5.75797200 | -2.30195200 | -1.48226200 |
| H  | -6.74708300 | -2.36437400 | -1.94186600 |
| C  | -4.83809300 | -1.34790800 | -1.92443100 |
| H  | -5.09861300 | -0.65826500 | -2.72900800 |
| C  | -3.57927100 | -1.26128800 | -1.32418400 |
| H  | -2.86930100 | -0.50605100 | -1.66172300 |
| C  | -0.67914600 | -3.32549000 | -0.56668200 |
| C  | -0.72740000 | -3.23363100 | -1.96799400 |
| H  | -1.27950400 | -2.41947700 | -2.44229900 |
| C  | -0.07013700 | -4.17053500 | -2.76454600 |
| H  | -0.11891200 | -4.08461400 | -3.85244600 |
| C  | 0.65838000  | -5.20879800 | -2.17302100 |
| H  | 1.18041600  | -5.93812100 | -2.79636300 |
| C  | 0.71594900  | -5.30482000 | -0.78159600 |
| H  | 1.28523800  | -6.10869400 | -0.30948100 |
| C  | 0.04873200  | -4.37156900 | 0.01924000  |
| H  | 0.11337000  | -4.47290400 | 1.10253200  |
| P  | -2.05613200 | 1.76034900  | 0.73793400  |
| P  | -1.53025900 | -2.01560600 | 0.41468400  |
| Pd | -0.47208600 | 0.11989500  | 0.16218600  |
| C  | 2.25689500  | -1.79734000 | -1.10967300 |
| C  | 1.80724100  | -0.59861100 | -0.28995200 |
| H  | 2.10197700  | -2.73115800 | -0.55266400 |
| H  | 1.65234900  | -1.85270400 | -2.02656600 |
| C  | 1.39134200  | 0.54402700  | -0.99417600 |
| C  | 2.27955800  | -0.54735100 | 1.12376700  |
| C  | 1.97723700  | -1.60441800 | 2.00043200  |
| C  | 3.09723700  | 0.49911500  | 1.58695800  |
| C  | 2.42546500  | -1.59610200 | 3.31951000  |
| H  | 1.39389000  | -2.44640300 | 1.63045200  |
| C  | 3.55444700  | 0.50072700  | 2.90917800  |
| H  | 3.41969100  | 1.28776800  | 0.90060000  |
| C  | 3.21212900  | -0.53475000 | 3.78322600  |
| H  | 2.16916100  | -2.42380500 | 3.98517100  |
| H  | 4.19607100  | 1.31628200  | 3.25250100  |
| H  | 3.57039100  | -0.52639200 | 4.81549100  |
| C  | -1.62402900 | -2.78820300 | 2.09848000  |
| H  | -0.59393700 | -2.72331100 | 2.48031200  |
| H  | -1.84570500 | -3.85793000 | 1.96861600  |
| C  | -2.57740100 | -2.18027600 | 3.13534900  |
| H  | -2.35059000 | -2.67668500 | 4.09200700  |
| H  | -3.61741000 | -2.45445800 | 2.89502700  |
| C  | -2.47472400 | -0.65867800 | 3.29295800  |
| H  | -1.46282000 | -0.32705800 | 3.00127000  |
| H  | -2.58324600 | -0.37676900 | 4.35269700  |
| C  | -3.52939400 | 0.10551500  | 2.48175000  |
| H  | -4.49081000 | 0.07464400  | 3.01956600  |

|    |             |             |             |
|----|-------------|-------------|-------------|
| H  | -3.71894500 | -0.39726400 | 1.52077800  |
| C  | -3.12198700 | 1.55693900  | 2.23473400  |
| H  | -3.98033800 | 2.23565900  | 2.12660300  |
| H  | -2.53432400 | 1.94533400  | 3.08010900  |
| N  | 3.64168100  | -1.53390100 | -1.44245200 |
| C  | 4.60290700  | -1.96647700 | -0.64942900 |
| O  | 5.79278400  | -1.57311700 | -0.70944000 |
| O  | 4.26200500  | -2.91028600 | 0.29871000  |
| C  | 5.21250000  | -3.16948500 | 1.31362400  |
| H  | 6.17574200  | -3.50052600 | 0.89610900  |
| H  | 5.38890600  | -2.27384500 | 1.93230700  |
| H  | 4.78780400  | -3.96233700 | 1.94525300  |
| Na | 4.96177800  | 0.39841000  | -1.76525600 |
| C  | 0.88863100  | 1.70563600  | -0.36277700 |
| H  | 0.51257400  | 2.51694400  | -0.98787400 |
| S  | 3.68456100  | 2.97667800  | -1.64062000 |
| O  | 3.62545200  | 1.98998500  | -2.83004800 |
| O  | 4.60966400  | 2.36479800  | -0.55437500 |
| C  | 4.76921600  | 4.29285100  | -2.32005000 |
| H  | 4.97509700  | 5.03328000  | -1.53329100 |
| H  | 5.69866300  | 3.79934500  | -2.64299900 |
| H  | 4.26519700  | 4.76907200  | -3.17381100 |
| H  | 1.25984900  | 2.02026100  | 0.61145100  |
| H  | 1.28446300  | 0.44922500  | -2.07759200 |

#### TS-D1

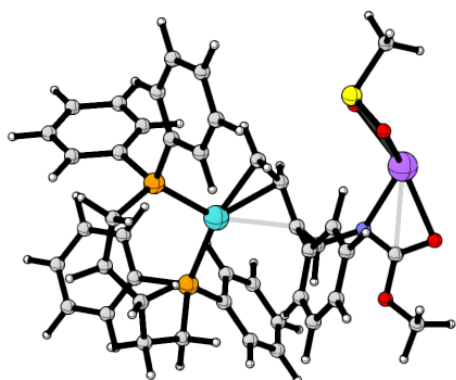

Energy: -3353.56266120

Zero point energy correction: 0.787127

Atom Coordinates:

|   |             |            |             |
|---|-------------|------------|-------------|
| C | -3.38114700 | 1.47162000 | -1.24980300 |
| C | -4.76975500 | 1.29613800 | -1.32026100 |
| H | -5.38133900 | 1.32281000 | -0.41821900 |

|    |             |             |             |
|----|-------------|-------------|-------------|
| C  | -5.39309500 | 1.06472600  | -2.55116000 |
| H  | -6.47510400 | 0.91891500  | -2.58796800 |
| C  | -4.63872500 | 1.01369000  | -3.72517100 |
| H  | -5.12754500 | 0.82949700  | -4.68453000 |
| C  | -3.25134300 | 1.19292800  | -3.66597000 |
| H  | -2.65238400 | 1.15067300  | -4.57847000 |
| C  | -2.62705800 | 1.41078500  | -2.43793400 |
| H  | -1.54010000 | 1.51887000  | -2.39445100 |
| C  | -2.02364400 | 3.44728900  | 0.39851100  |
| C  | -1.40829100 | 3.91806000  | 1.57328400  |
| H  | -1.24378000 | 3.23937200  | 2.41477800  |
| C  | -0.97072600 | 5.23874500  | 1.66658500  |
| H  | -0.49267500 | 5.58776500  | 2.58490900  |
| C  | -1.12950800 | 6.10924600  | 0.58122300  |
| H  | -0.77775000 | 7.14118100  | 0.64912000  |
| C  | -1.73941200 | 5.64956700  | -0.58839600 |
| H  | -1.86981600 | 6.32276100  | -1.43907000 |
| C  | -2.18947600 | 4.32727900  | -0.67994300 |
| H  | -2.66385200 | 3.98367300  | -1.60027400 |
| C  | -2.74843300 | -2.65088600 | 0.01810700  |
| C  | -3.37821600 | -3.79246600 | 0.54121600  |
| H  | -2.94597300 | -4.31946000 | 1.39422400  |
| C  | -4.55945400 | -4.26872600 | -0.03084000 |
| H  | -5.04638300 | -5.15297000 | 0.38718700  |
| C  | -5.11645600 | -3.61892400 | -1.13896500 |
| H  | -6.04085100 | -3.99402900 | -1.58453900 |
| C  | -4.48649800 | -2.49273900 | -1.67463100 |
| H  | -4.91092400 | -1.97874900 | -2.53929600 |
| C  | -3.30890900 | -2.00963800 | -1.09547100 |
| H  | -2.82312300 | -1.12437300 | -1.50590000 |
| C  | 0.01419900  | -3.28224800 | 0.17333800  |
| C  | -0.09024800 | -3.82885600 | -1.11717600 |
| H  | -0.92286400 | -3.54419300 | -1.76379900 |
| C  | 0.86384400  | -4.73506300 | -1.58170600 |
| H  | 0.77022900  | -5.15071200 | -2.58789300 |
| C  | 1.93781000  | -5.10676700 | -0.76572400 |
| H  | 2.68834700  | -5.81051100 | -1.13254700 |
| C  | 2.04843500  | -4.56689500 | 0.51707500  |
| H  | 2.89093600  | -4.83836300 | 1.15723600  |
| C  | 1.09529400  | -3.65928800 | 0.98609800  |
| H  | 1.21662300  | -3.23546500 | 1.98239800  |
| P  | -2.44874000 | 1.65773700  | 0.31954100  |
| P  | -1.18344200 | -2.00086200 | 0.72499900  |
| Pd | -0.57235900 | 0.21410200  | 0.23074500  |

|    |             |             |             |
|----|-------------|-------------|-------------|
| C  | 2.07674600  | -0.96067900 | -1.28942200 |
| C  | 1.67152100  | -0.08875100 | -0.09989400 |
| H  | 2.11713700  | -2.01565400 | -0.99177100 |
| H  | 1.27090000  | -0.88079700 | -2.04463100 |
| C  | 1.29727200  | 1.24259600  | -0.47512600 |
| C  | 2.24397900  | -0.43707200 | 1.23419800  |
| C  | 3.33879800  | -1.32008900 | 1.32802900  |
| C  | 1.68660500  | 0.02631000  | 2.44722000  |
| C  | 3.85371500  | -1.70971200 | 2.56633100  |
| H  | 3.78269600  | -1.72823100 | 0.42377000  |
| C  | 2.19512700  | -0.36897000 | 3.68454100  |
| H  | 0.79999100  | 0.66244600  | 2.42744300  |
| C  | 3.28800400  | -1.23965800 | 3.75417000  |
| H  | 4.70088000  | -2.39955800 | 2.59869500  |
| H  | 1.72383900  | -0.00294200 | 4.60013700  |
| H  | 3.68608900  | -1.55335200 | 4.72202300  |
| C  | -1.27945900 | -2.35938900 | 2.54836700  |
| H  | -0.35515700 | -1.91936700 | 2.95598900  |
| H  | -1.19821600 | -3.44889300 | 2.68329800  |
| C  | -2.48536800 | -1.82120100 | 3.32791500  |
| H  | -2.30814600 | -2.07253500 | 4.38601100  |
| H  | -3.39440800 | -2.37393100 | 3.03787100  |
| C  | -2.73077700 | -0.31150100 | 3.18523800  |
| H  | -1.78395100 | 0.18084500  | 2.90380800  |
| H  | -3.01326200 | 0.12120600  | 4.15897600  |
| C  | -3.82041200 | 0.04959400  | 2.16617700  |
| H  | -4.81117200 | -0.10776500 | 2.62332700  |
| H  | -3.78209400 | -0.63389700 | 1.30431800  |
| C  | -3.69861000 | 1.49592700  | 1.67984400  |
| H  | -4.65599100 | 1.91416600  | 1.33739700  |
| H  | -3.35776800 | 2.14917900  | 2.49720900  |
| N  | 3.32646900  | -0.46591300 | -1.82927500 |
| C  | 4.36768000  | -1.24468700 | -2.00181700 |
| O  | 5.50526400  | -0.83967300 | -2.35904200 |
| O  | 4.20436200  | -2.59759100 | -1.74612200 |
| C  | 5.35559700  | -3.41272400 | -1.84585800 |
| H  | 5.79348900  | -3.37736100 | -2.85605300 |
| H  | 6.13381200  | -3.10802600 | -1.12685800 |
| H  | 5.03109000  | -4.43837900 | -1.62004300 |
| Na | 4.83162000  | 1.33197500  | -1.74262000 |
| C  | 1.25471000  | 2.39916800  | 0.32032900  |
| H  | 0.76943000  | 3.29053300  | -0.07521300 |
| S  | 3.46771900  | 3.30017100  | -0.15222900 |
| O  | 3.51000900  | 3.33072200  | -1.67261900 |

|   |            |            |             |
|---|------------|------------|-------------|
| O | 4.54174600 | 2.37385700 | 0.39601100  |
| C | 3.99406200 | 4.97209700 | 0.35429000  |
| H | 4.03557800 | 5.00462300 | 1.45126900  |
| H | 4.98904700 | 5.13458000 | -0.08516300 |
| H | 3.26554600 | 5.69636300 | -0.03423600 |
| H | 1.40262900 | 2.36811300 | 1.39815000  |
| H | 1.15966200 | 1.40554500 | -1.54832900 |

#### TS-D2

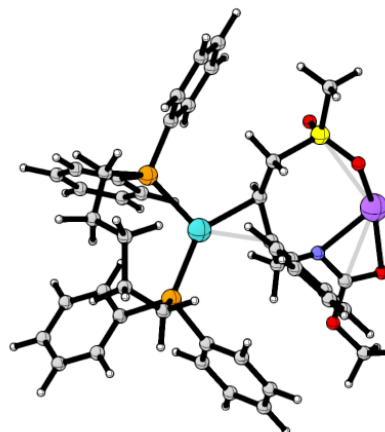

Energy: -3353.58423474

Zero point energy correction: 0.788846

Atom Coordinates:

|   |             |            |             |
|---|-------------|------------|-------------|
| C | -3.08519700 | 1.81485300 | -1.28321700 |
| C | -4.45053500 | 2.11104400 | -1.40109900 |
| H | -5.02213400 | 2.45404300 | -0.53792000 |
| C | -5.10652400 | 1.96209900 | -2.62748000 |
| H | -6.17344900 | 2.18652800 | -2.69909300 |
| C | -4.40460400 | 1.52821300 | -3.75537700 |
| H | -4.92026800 | 1.41070900 | -4.71128400 |
| C | -3.03953200 | 1.23917100 | -3.65192100 |
| H | -2.48269500 | 0.89321500 | -4.52580300 |
| C | -2.38928300 | 1.37113800 | -2.42388800 |
| H | -1.33401000 | 1.09978300 | -2.33118500 |
| C | -1.42591800 | 3.58431700 | 0.28828800  |
| C | -1.20279300 | 4.28821100 | 1.48508400  |
| H | -1.57404900 | 3.89908200 | 2.43441200  |
| C | -0.48009200 | 5.48542600 | 1.48742600  |
| H | -0.32192600 | 6.01695700 | 2.42888000  |
| C | 0.04708300  | 5.99421300 | 0.29692900  |
| H | 0.61694200  | 6.92620500 | 0.29993500  |
| C | -0.15749900 | 5.29538000 | -0.89788600 |
| H | 0.26167200  | 5.67364700 | -1.83265600 |
| C | -0.89136200 | 4.10819600 | -0.90297300 |

|    |             |             |             |    |             |             |             |
|----|-------------|-------------|-------------|----|-------------|-------------|-------------|
| H  | -1.03237000 | 3.57385100  | -1.84367800 | H  | 1.93791500  | -0.70659100 | 4.58613100  |
| C  | -3.00905200 | -2.48508800 | 0.04823400  | H  | 3.80550400  | -2.36767100 | 4.41724300  |
| C  | -3.70357500 | -3.61674700 | 0.50736100  | C  | -1.62047000 | -2.27433000 | 2.59834700  |
| H  | -3.29048100 | -4.22613600 | 1.31431700  | H  | -0.66823400 | -1.95828500 | 3.05393700  |
| C  | -4.92524400 | -3.97606900 | -0.06631300 | H  | -1.70077200 | -3.36113600 | 2.75625500  |
| H  | -5.46064100 | -4.85440800 | 0.30243100  | C  | -2.78318300 | -1.54949600 | 3.29089000  |
| C  | -5.46341900 | -3.21514800 | -1.11170200 | H  | -2.73121600 | -1.81769400 | 4.35866500  |
| H  | -6.42019400 | -3.49825800 | -1.55713700 | H  | -3.74125800 | -1.95856400 | 2.92815800  |
| C  | -4.77247300 | -2.09606300 | -1.58350400 | C  | -2.78130300 | -0.01746600 | 3.13876300  |
| H  | -5.18028600 | -1.49563200 | -2.40010900 | H  | -1.76435800 | 0.31598700  | 2.86801500  |
| C  | -3.55283300 | -1.73399800 | -1.00285800 | H  | -3.00615200 | 0.45970700  | 4.10720800  |
| H  | -3.01943800 | -0.85428800 | -1.36124600 | C  | -3.77889900 | 0.51598600  | 2.10024600  |
| C  | -0.30321800 | -3.34459800 | 0.28722000  | H  | -4.79295500 | 0.50826900  | 2.53327700  |
| C  | -0.45689400 | -3.96038100 | -0.96751100 | H  | -3.82119200 | -0.15810800 | 1.23127300  |
| H  | -1.28032500 | -3.66373100 | -1.62082400 | C  | -3.42910600 | 1.93483000  | 1.63324100  |
| C  | 0.43196100  | -4.95158200 | -1.38764200 | H  | -4.31039200 | 2.49199200  | 1.28612000  |
| H  | 0.29737600  | -5.41951300 | -2.36607200 | H  | -3.01802200 | 2.51063500  | 2.47482700  |
| C  | 1.48945800  | -5.34598900 | -0.56023900 | N  | 3.22639400  | -0.53397400 | -1.91909300 |
| H  | 2.18570600  | -6.12126800 | -0.88867000 | C  | 4.11290000  | -1.43059300 | -2.27730600 |
| C  | 1.65399900  | -4.73278300 | 0.68427700  | O  | 5.29858700  | -1.16123000 | -2.61134100 |
| H  | 2.48577000  | -5.01791000 | 1.33249500  | O  | 3.72627600  | -2.76105500 | -2.25070200 |
| C  | 0.76920600  | -3.73641200 | 1.10519300  | C  | 4.72596300  | -3.72619100 | -2.51481300 |
| H  | 0.93743000  | -3.25452800 | 2.06880600  | H  | 5.17977600  | -3.58321500 | -3.50820400 |
| P  | -2.14036700 | 1.88330900  | 0.29867600  | H  | 5.53305000  | -3.69216900 | -1.76409700 |
| P  | -1.40400700 | -1.94921400 | 0.77611200  | H  | 4.23078700  | -4.70677200 | -2.47122500 |
| Pd | -0.53505000 | 0.18275500  | 0.29627700  | Na | 4.99330800  | 0.90165200  | -1.50154900 |
| C  | 1.93131400  | -0.89787100 | -1.37900200 | C  | 1.75473700  | 2.31246400  | 0.74829200  |
| C  | 1.69415400  | -0.15266900 | -0.06599600 | H  | 1.01360600  | 3.11745600  | 0.82932800  |
| H  | 1.81218000  | -1.98014100 | -1.22043300 | S  | 3.23293900  | 3.14188700  | 0.07108500  |
| H  | 1.12750000  | -0.59758600 | -2.07919700 | O  | 2.94756000  | 3.61008200  | -1.30239400 |
| C  | 1.34052200  | 1.21692200  | -0.18324700 | O  | 4.41594000  | 2.24809600  | 0.24036800  |
| C  | 2.29896800  | -0.72419600 | 1.17012600  | C  | 3.49188700  | 4.57515400  | 1.11554000  |
| C  | 3.33890300  | -1.67279200 | 1.10012000  | H  | 3.65902500  | 4.23876300  | 2.14652900  |
| C  | 1.81767700  | -0.39693800 | 2.45813800  | H  | 4.38245800  | 5.07945700  | 0.71774800  |
| C  | 3.87630000  | -2.25082600 | 2.25356200  | H  | 2.60573900  | 5.21692300  | 1.03644600  |
| H  | 3.71623000  | -1.98577000 | 0.13014400  | H  | 2.05226000  | 1.97596300  | 1.74788400  |
| C  | 2.35071900  | -0.97428300 | 3.60995900  | H  | 1.19711600  | 1.57895500  | -1.20687900 |
| H  | 0.96556900  | 0.28028100  | 2.55020700  |    |             |             |             |
| C  | 3.39055800  | -1.90764900 | 3.51729600  |    |             |             |             |
| H  | 4.67627000  | -2.98961800 | 2.15707000  |    |             |             |             |

## 8. Reference

- [1] Shi, L.; He, Y.; Chang, Y.; Zheng, N.; Yang, Z.; Gong, J. Stereoselective Pd-Catalyzed Decarboxylative Allylation: Assembly of Highly Functionalized Allylic Amines Bearing a Quaternary Center. *Org. Lett.* **2019**, *21*, 3077.
- [2] Gaussian 16, Revision A.03, Frisch, M. J.; Trucks, G. W.; Schlegel, H. B.; Scuseria, G. E.; Robb, M. A.; Cheeseman, J. R.; Scalmani, G.; Barone, V.; Petersson, G. A.; Nakatsuji, H.; Li, X.; Caricato, M.; Marenich, A. V.; Bloino, J.; Janesko, B. G.; Gomperts, R.; Mennucci, B.; Hratchian, H. P.; Ortiz, J. V.; Izmaylov, A. F.; Sonnenberg, J. L.; Williams-Young, D.; Ding, F.; Lipparini, F.; Egidi, F.; Goings, J.; Peng, B.; Petrone, A.; Henderson, T.; Ranasinghe, D.; Zakrzewski, V. G.; Gao, J.; Rega, N.; Zheng, G.; Liang, W.; Hada, M.; Ehara, M.; Toyota, K.; Fukuda, R.; Hasegawa, J.; Ishida, M.; Nakajima, T.; Honda, Y.; Kitao, O.; Nakai, H.; Vreven, T.; Throssell, K.; Montgomery, J. A., Jr.; Peralta, J. E.; Ogliaro, F.; Bearpark, M. J.; Heyd, J. J.; Brothers, E. N.; Kudin, K. N.; Staroverov, V. N.; Keith, T. A.; Kobayashi, R.; Normand, J.; Raghavachari, K.; Rendell, A. P.; Burant, J. C.; Iyengar, S. S.; Tomasi, J.; Cossi, M.; Millam, J. M.; Klene, M.; Adamo, C.; Cammi, R.; Ochterski, J. W.; Martin, R. L.; Morokuma, K.; Farkas, O.; Foresman, J. B.; Fox, D. J. Gaussian, Inc., Wallingford CT, **2016**.
- [3] Neese, F.; Wennmohs, F.; Becker, U.; Riplinger, C. The ORCA quantum chemistry program package. *J. Chem. Phys.* **2020**, *152*, 224108.
- [4] (a) Becke, A. D., Density-functional thermochemistry. III. The role of exact exchange. *J. Chem. Phys.* **1993**, *98*, 5648. (b) Lee, C.; Yang, W.; Parr, R. G. Development of the Colle-Salvetti correlation-energy formula into a functional of the electron density. *Phys. Rev. B*, **1988**, *37*, 785.
- [5] Becke, A. D.; Johnson, E. R. A density-functional model of the dispersion interaction. *J. Chem. Phys.* **2005**, *123*, 154101.
- [6] Weigend, F.; Ahlrichs, R., Balanced basis sets of split valence, triple zeta valence and quadruple zeta valence quality for H to Rn: Design and assessment of accuracy. *Phys. Chem. Chem. Phys.* **2005**, *7*, 3297.
- [7] Fukui, K. The path of chemical reactions-the IRC approach. *Acc. Chem. Res.* **1981**, *14*, 363.
- [8] CYLview20; Legault, C. Y., Université de Sherbrooke, **2020** (<http://www.cylview.org>).

## 9. NMR Spectra.

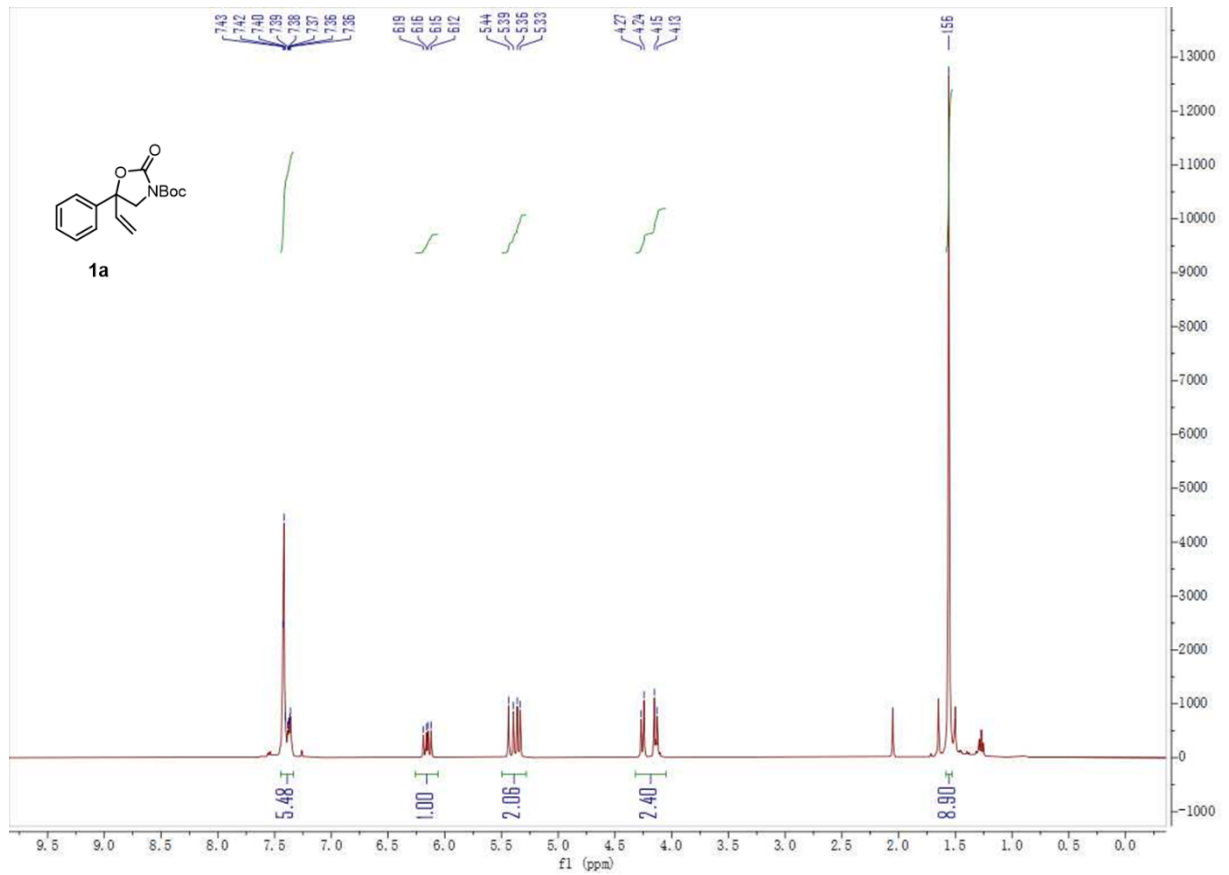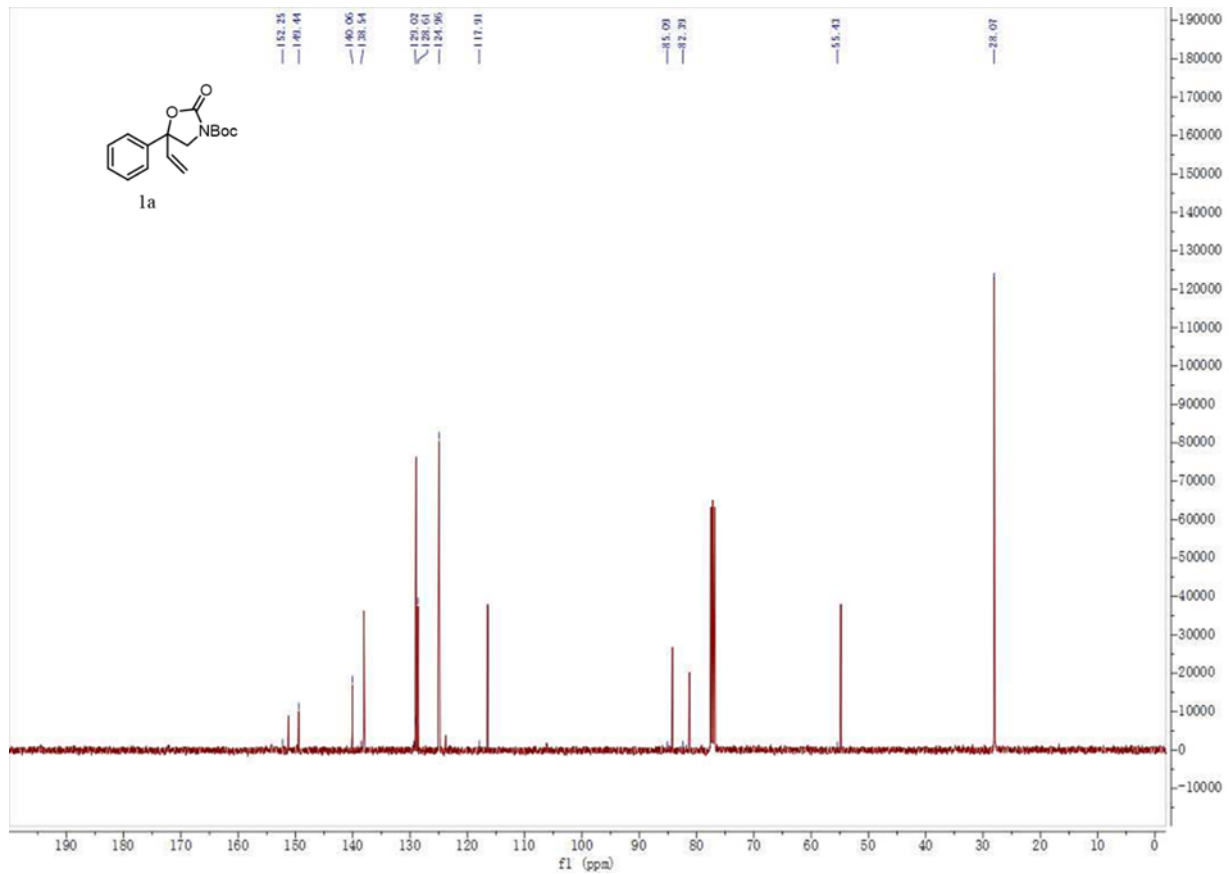

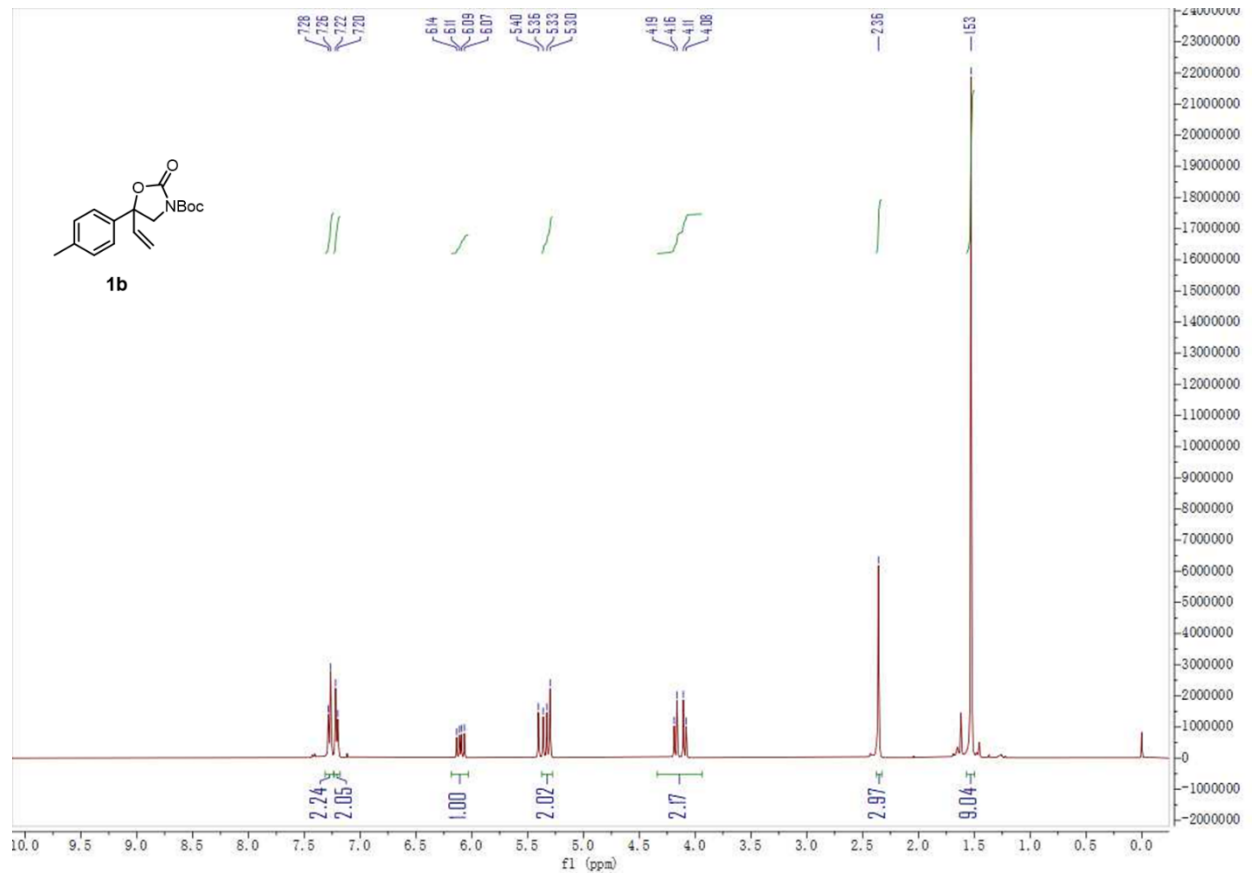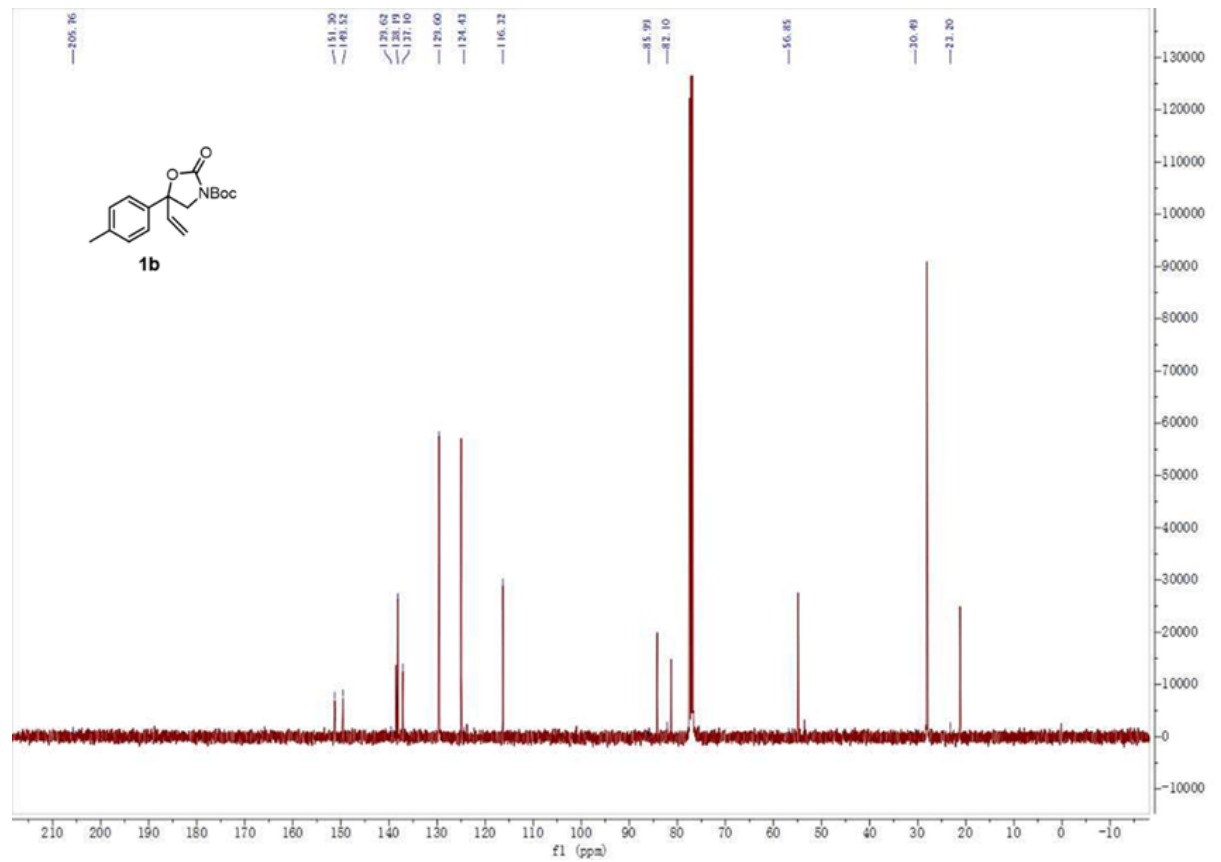



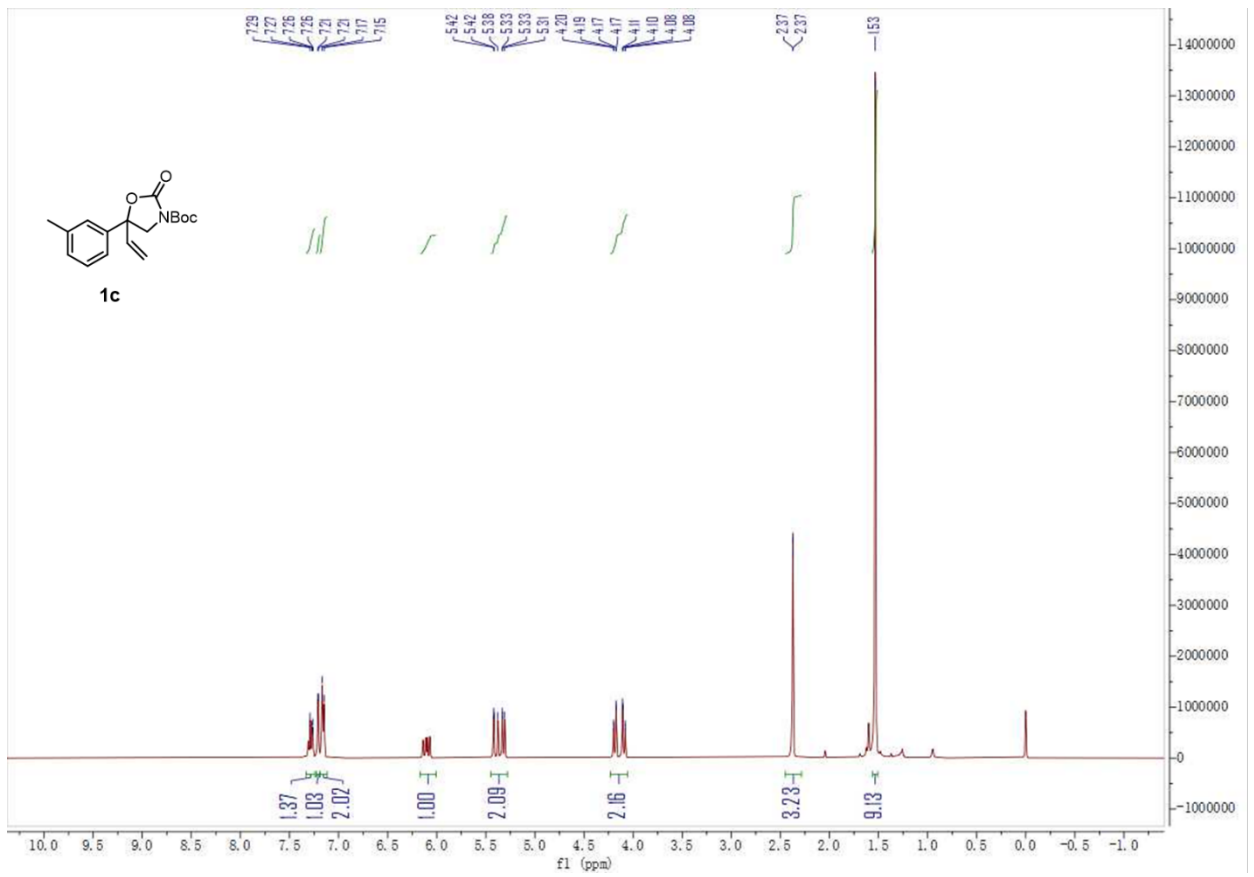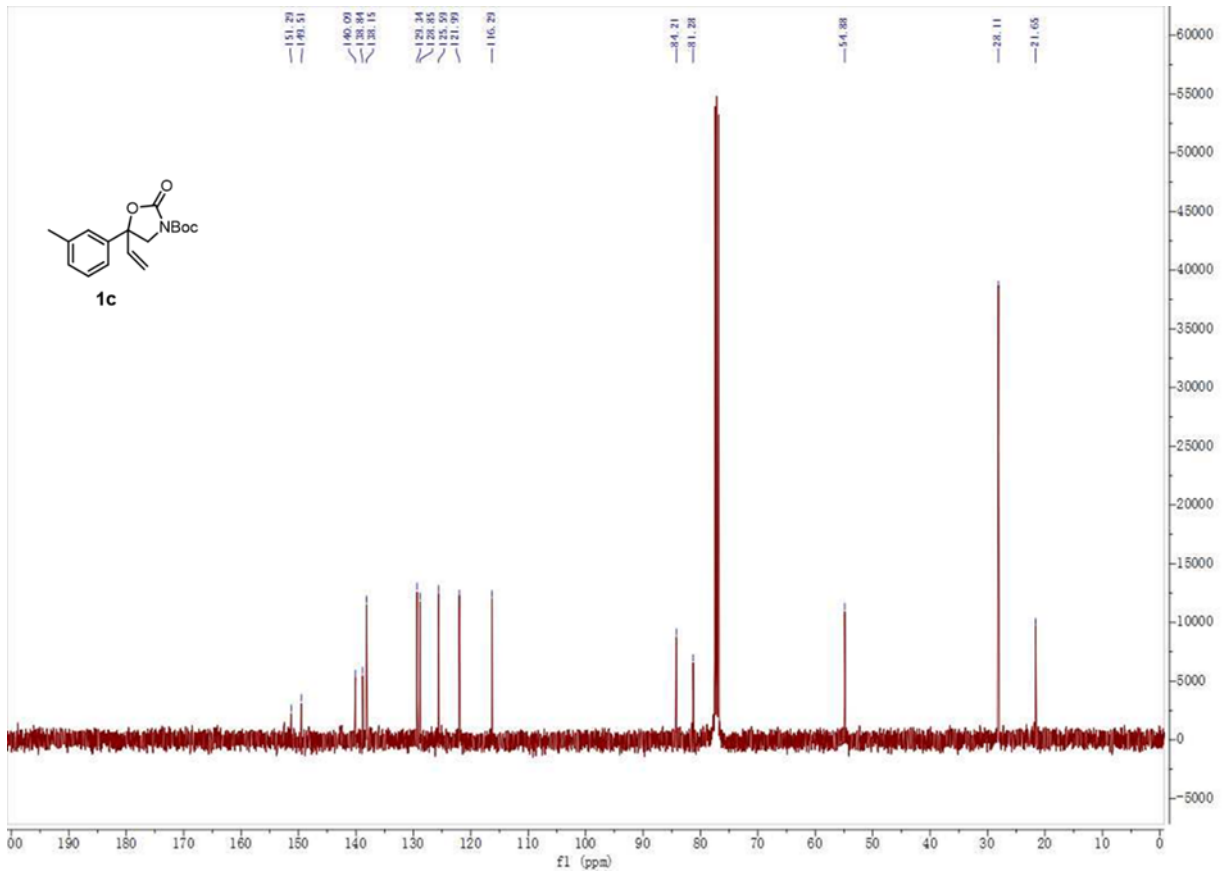

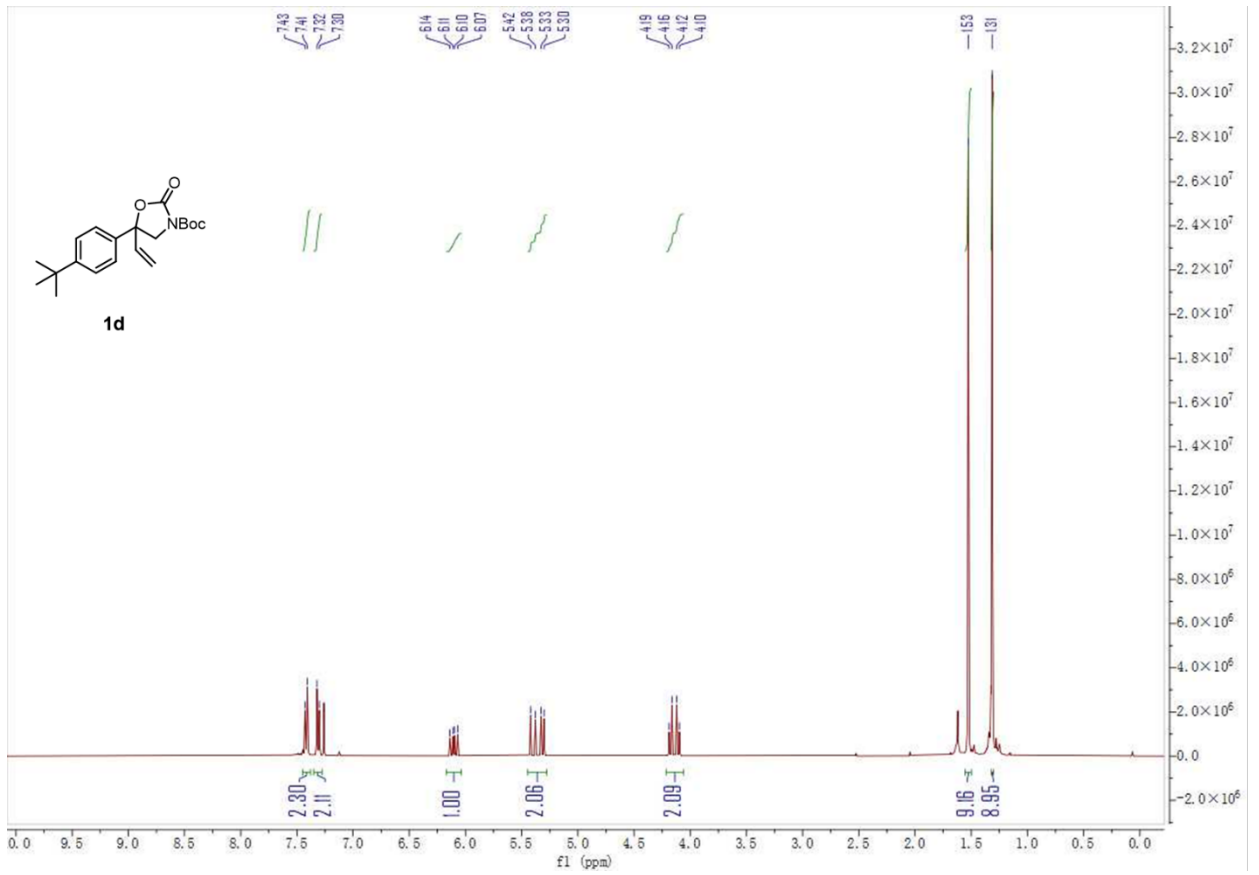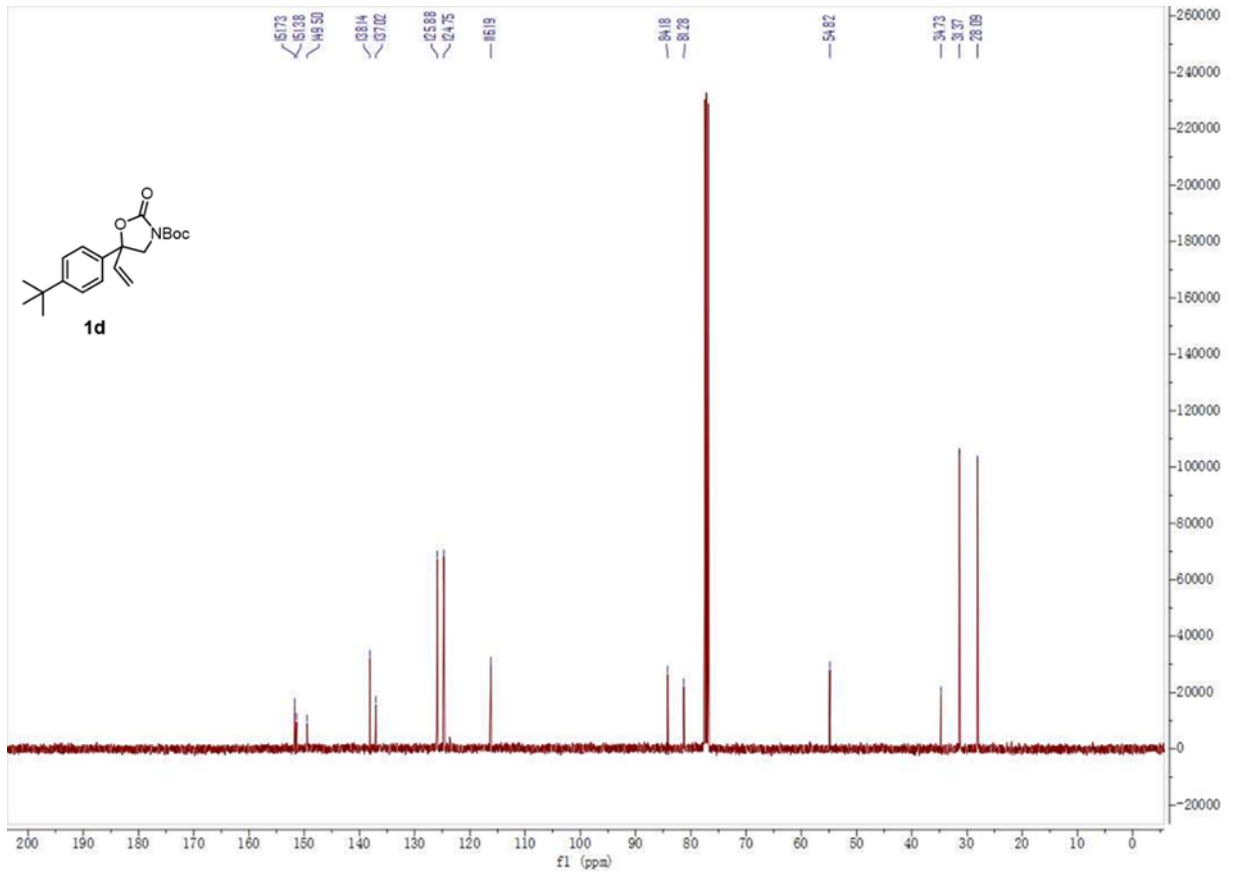

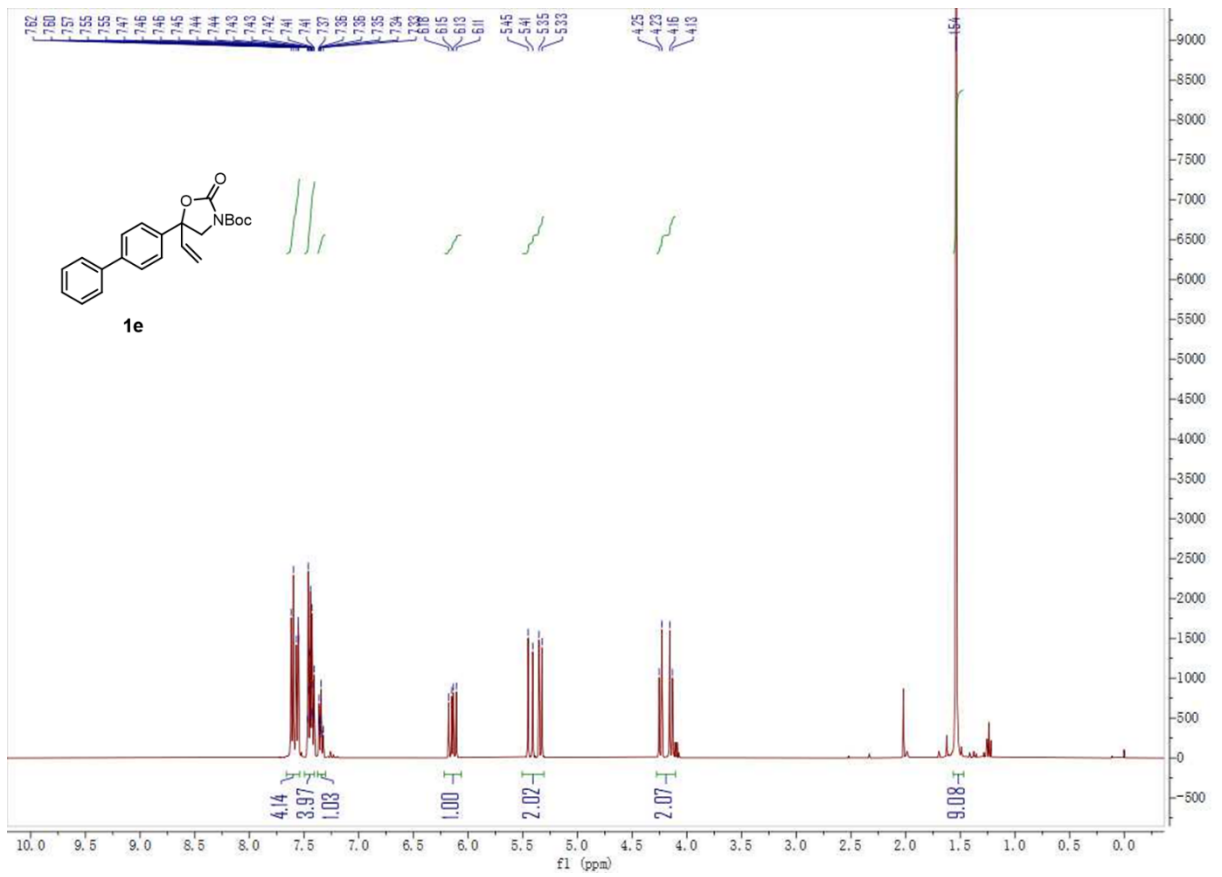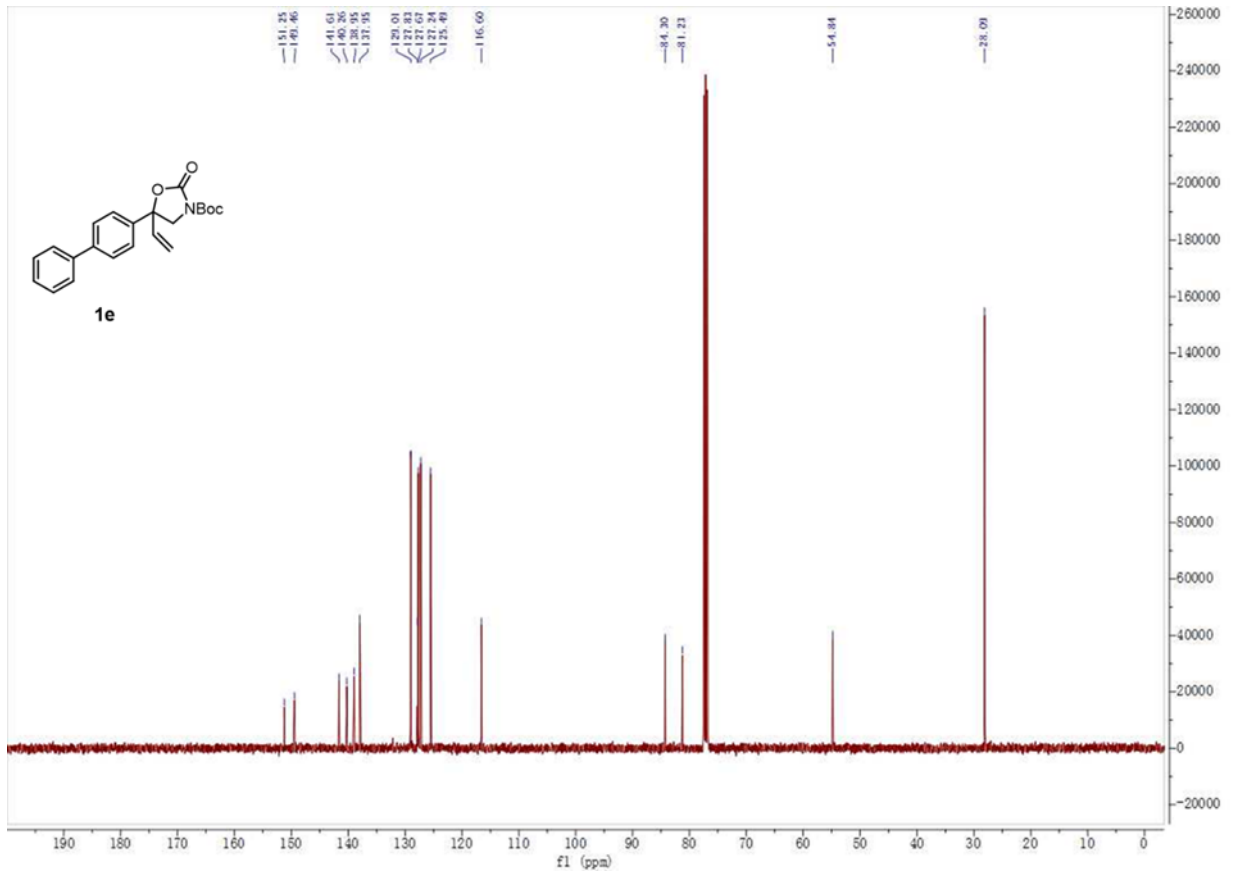

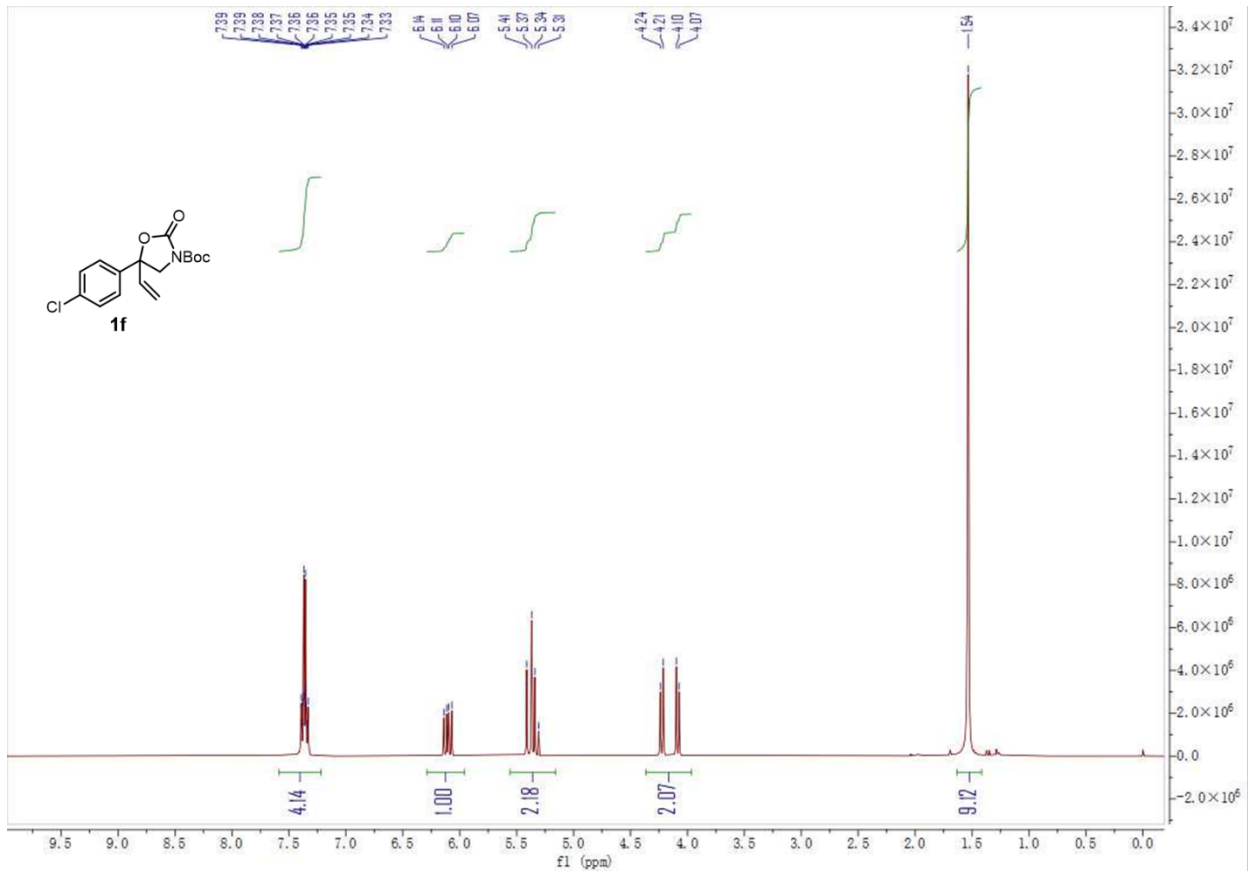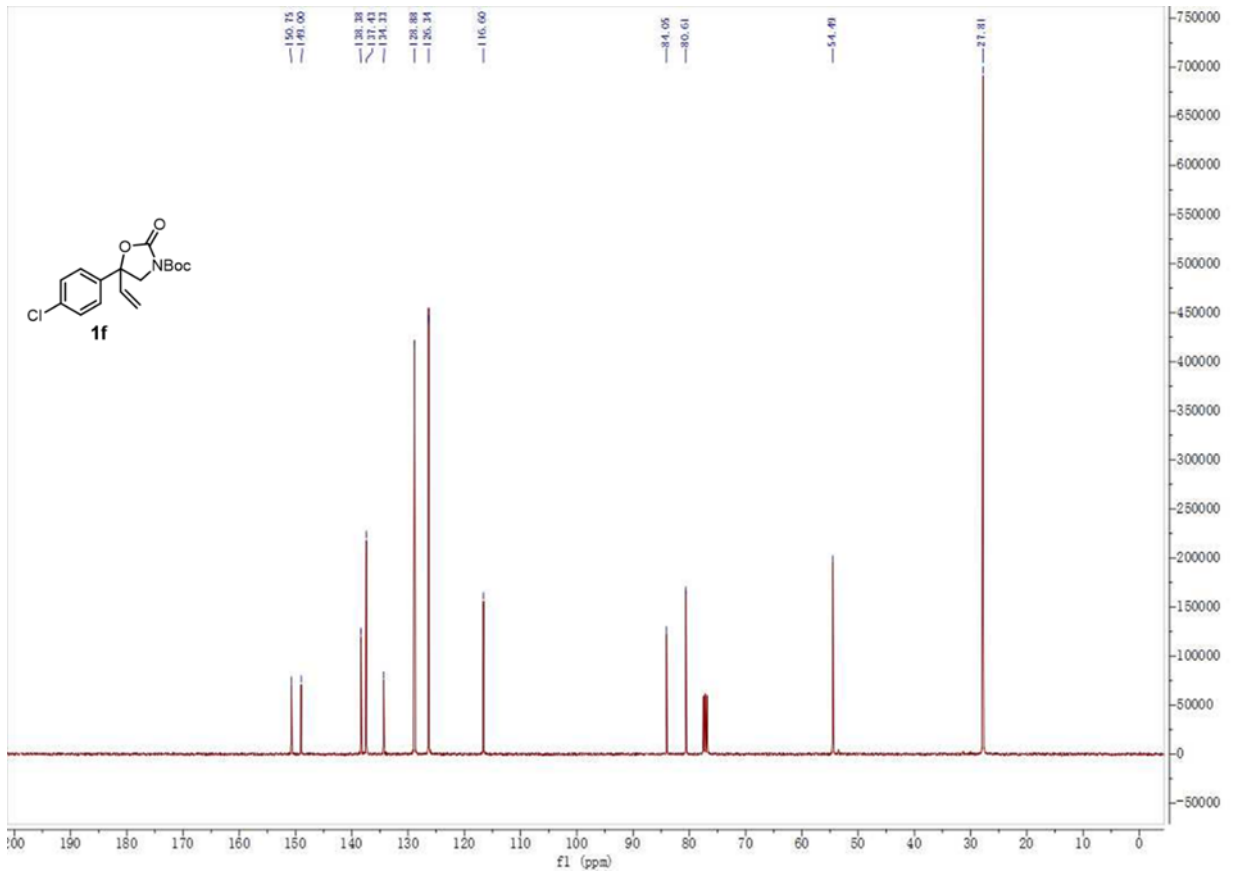

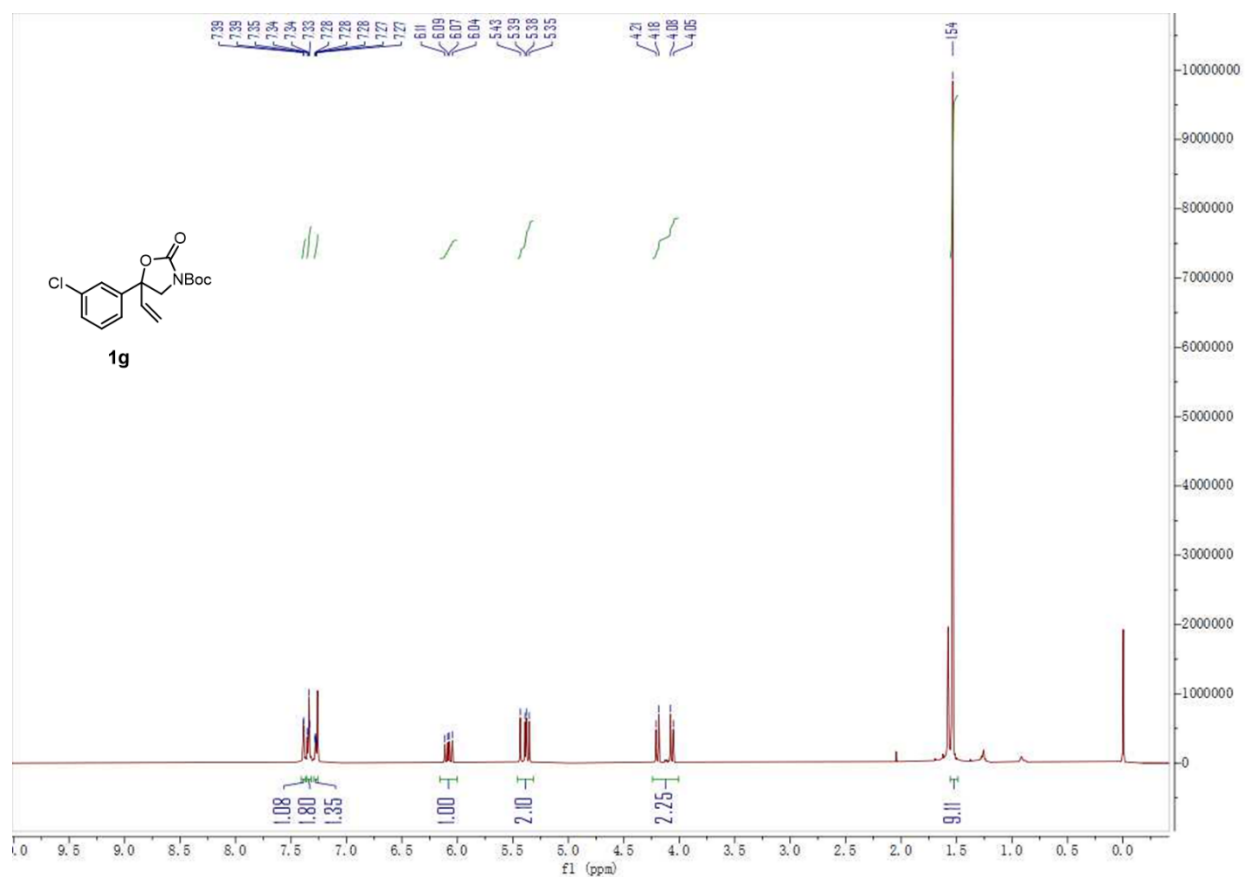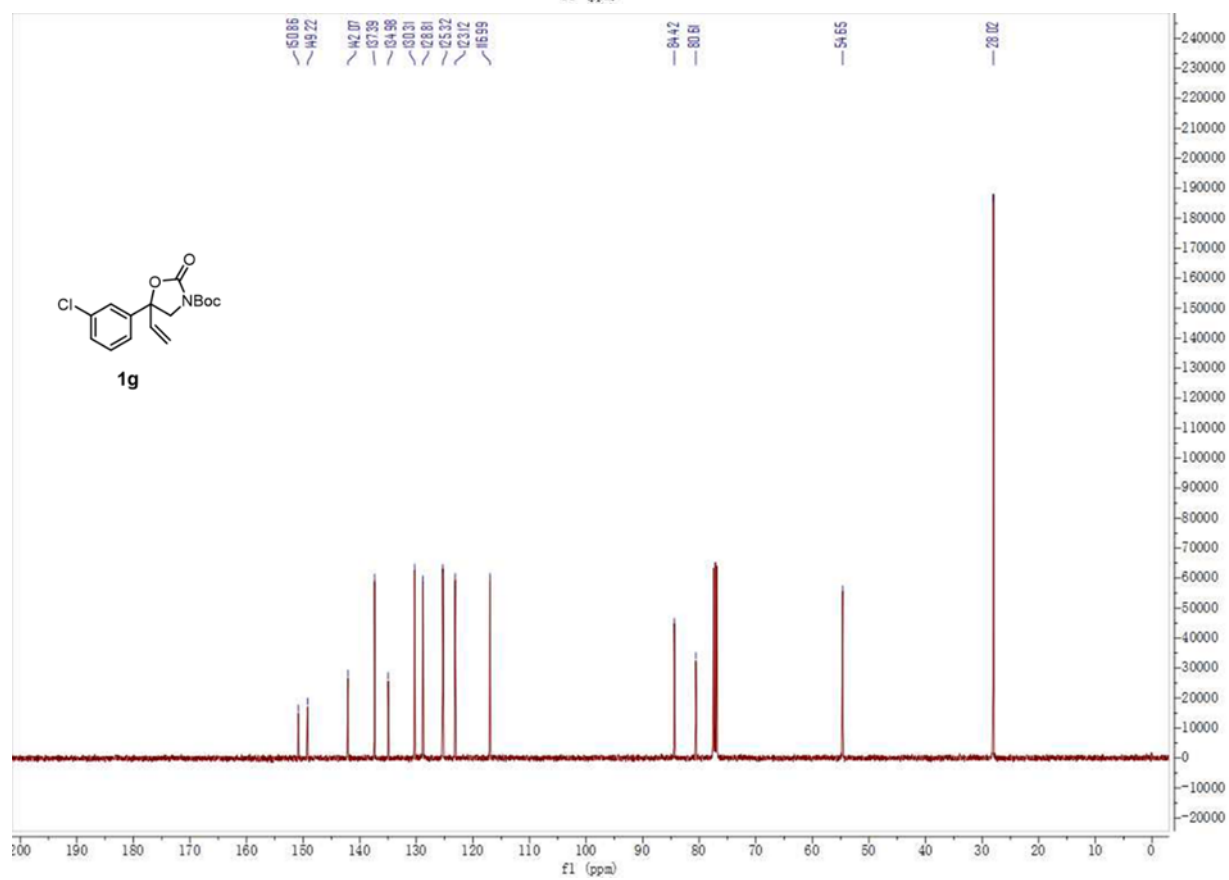

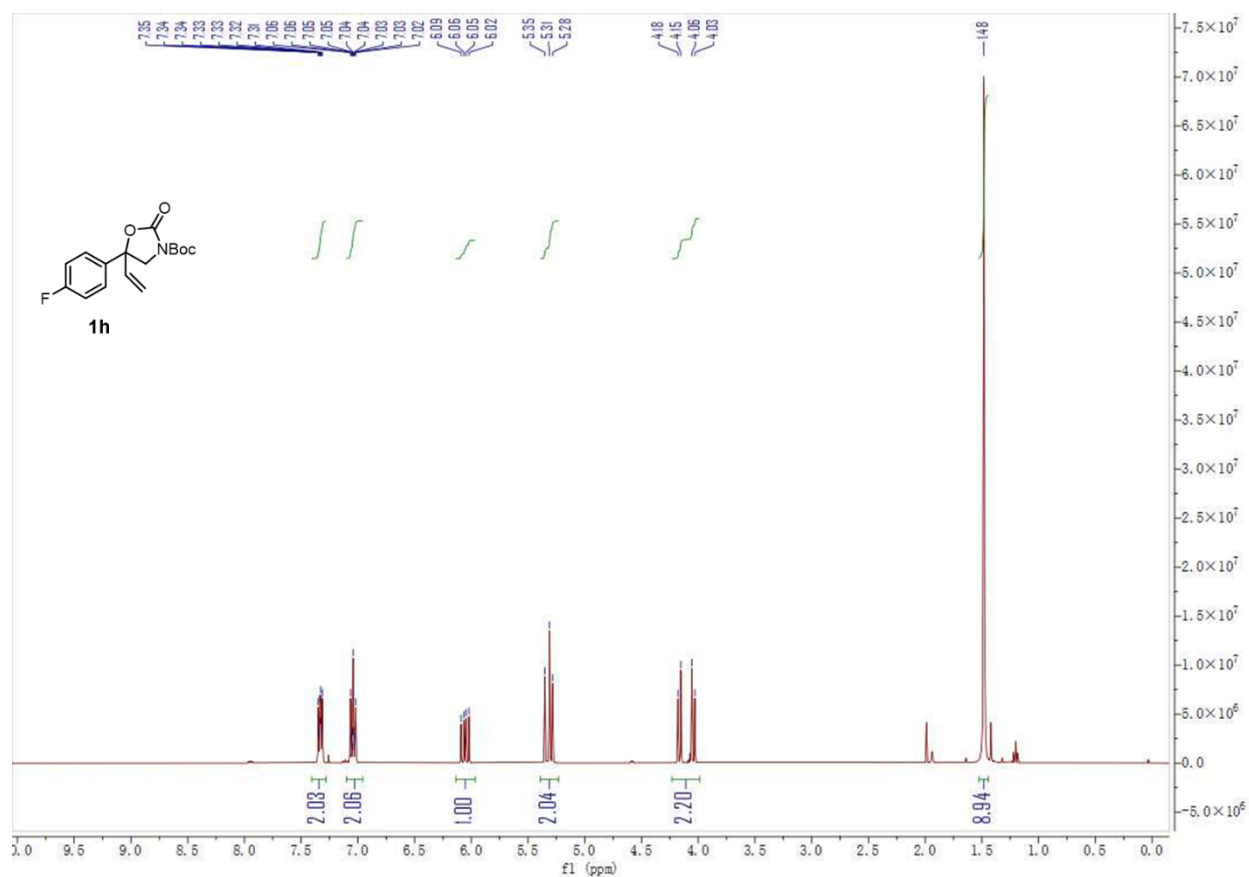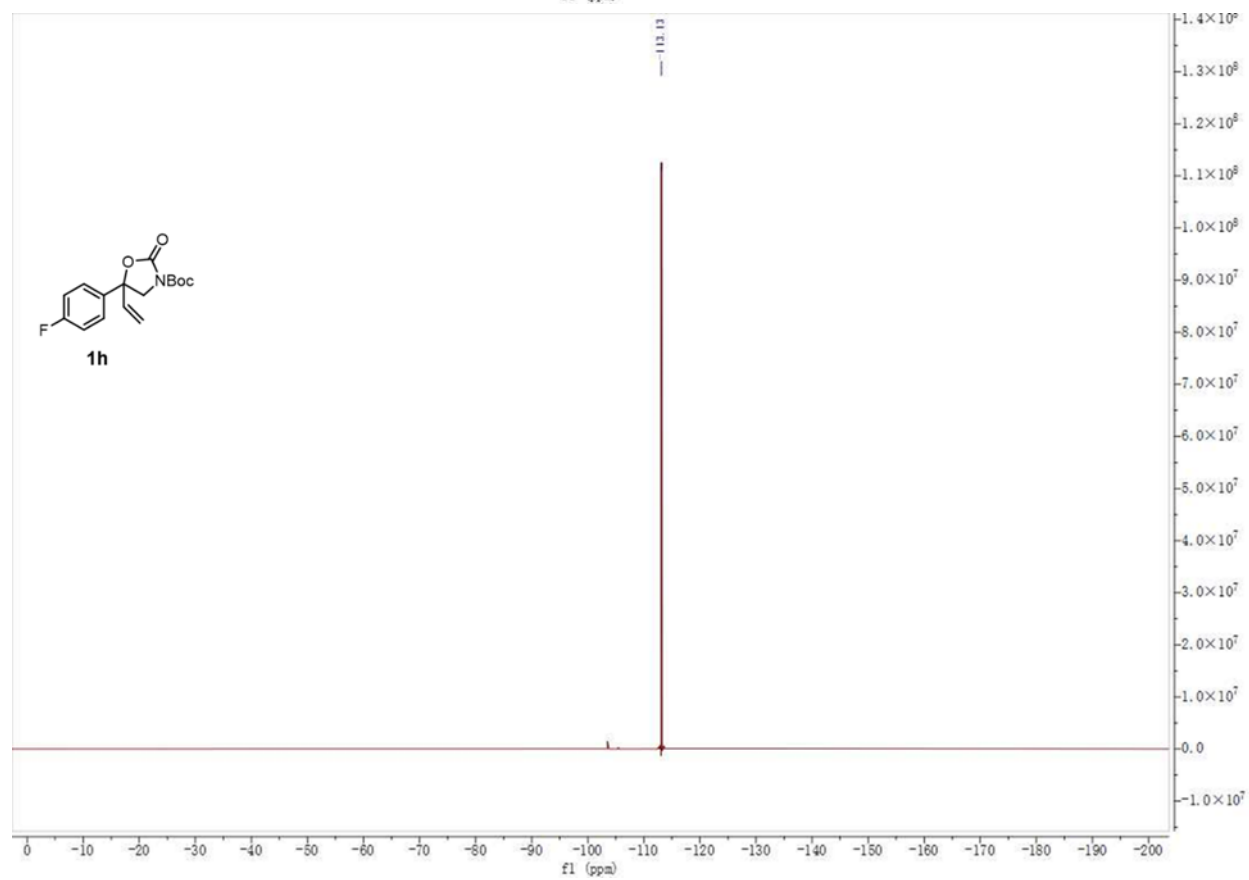

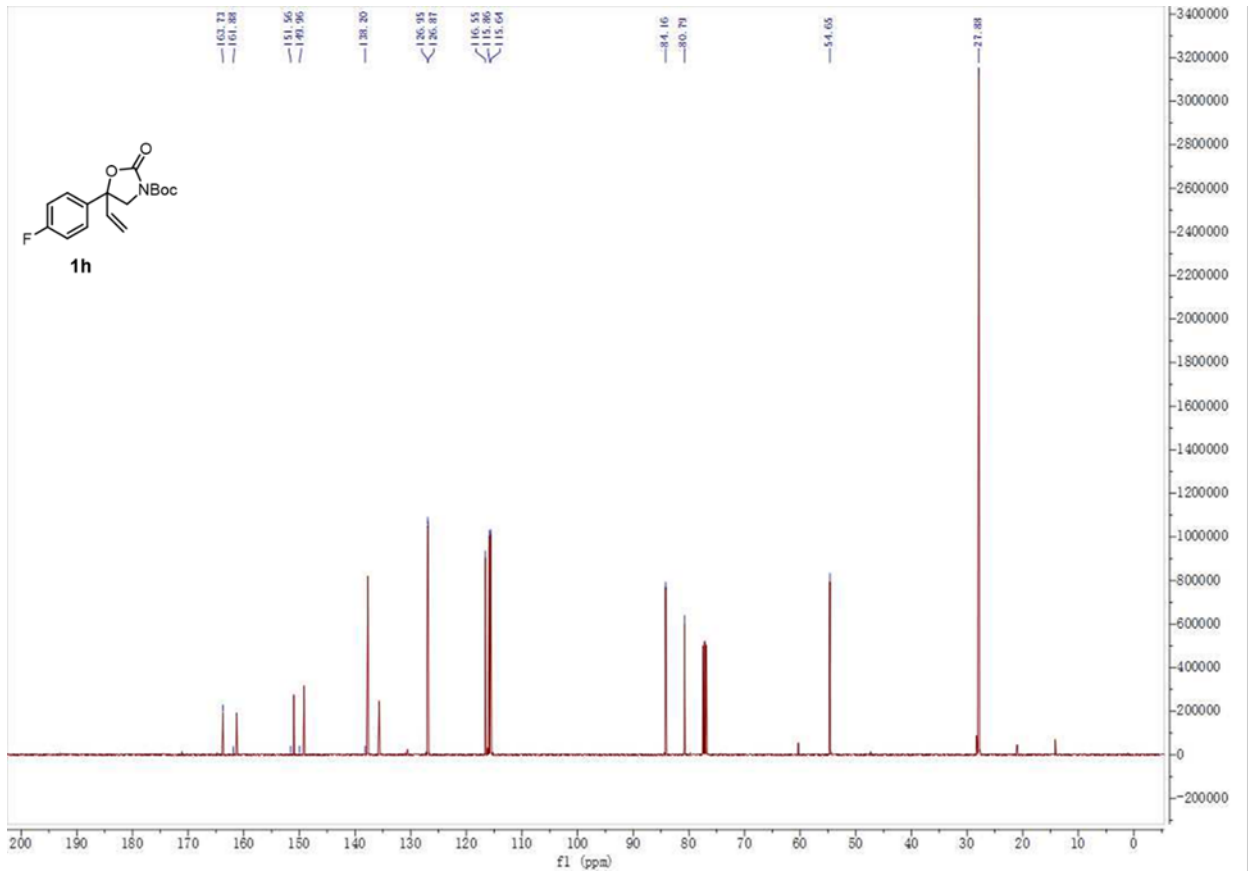

53

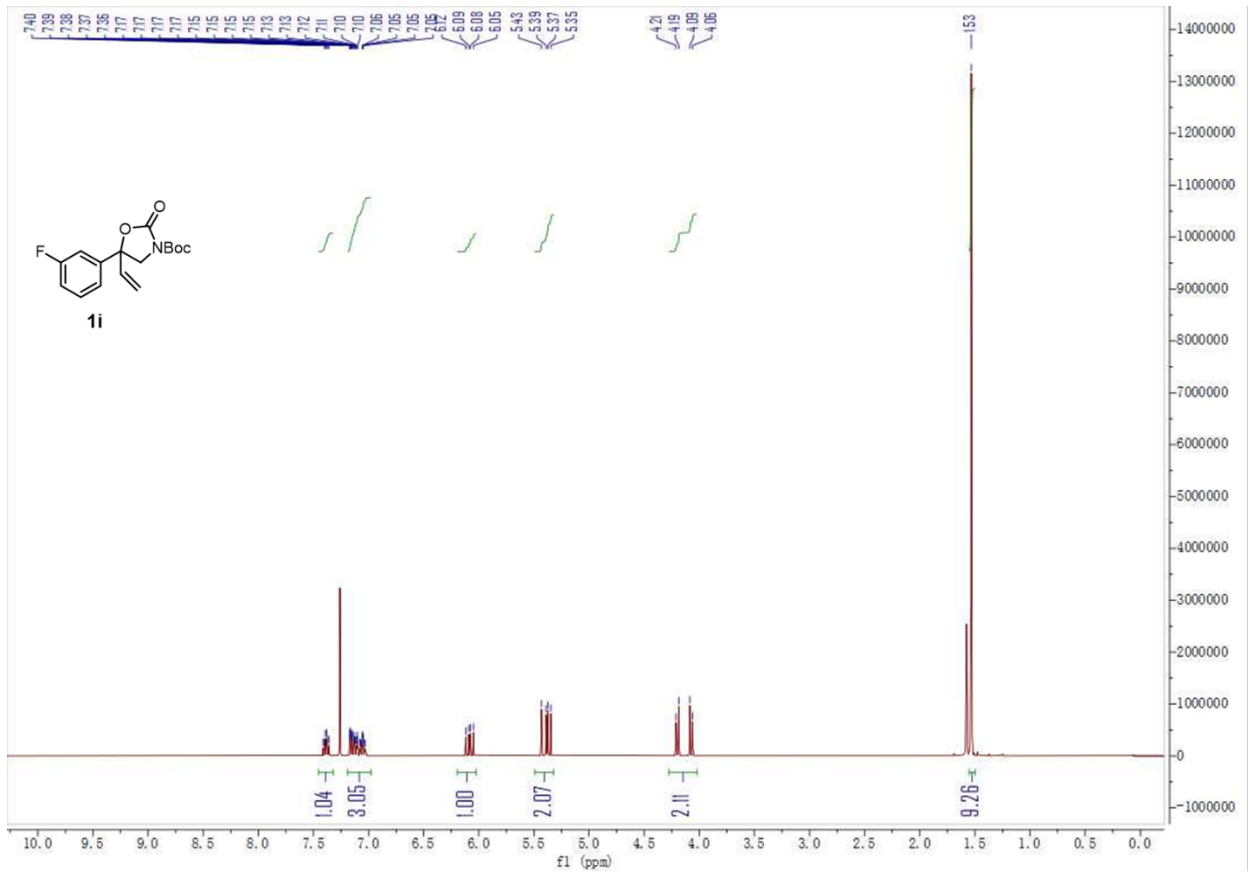

60

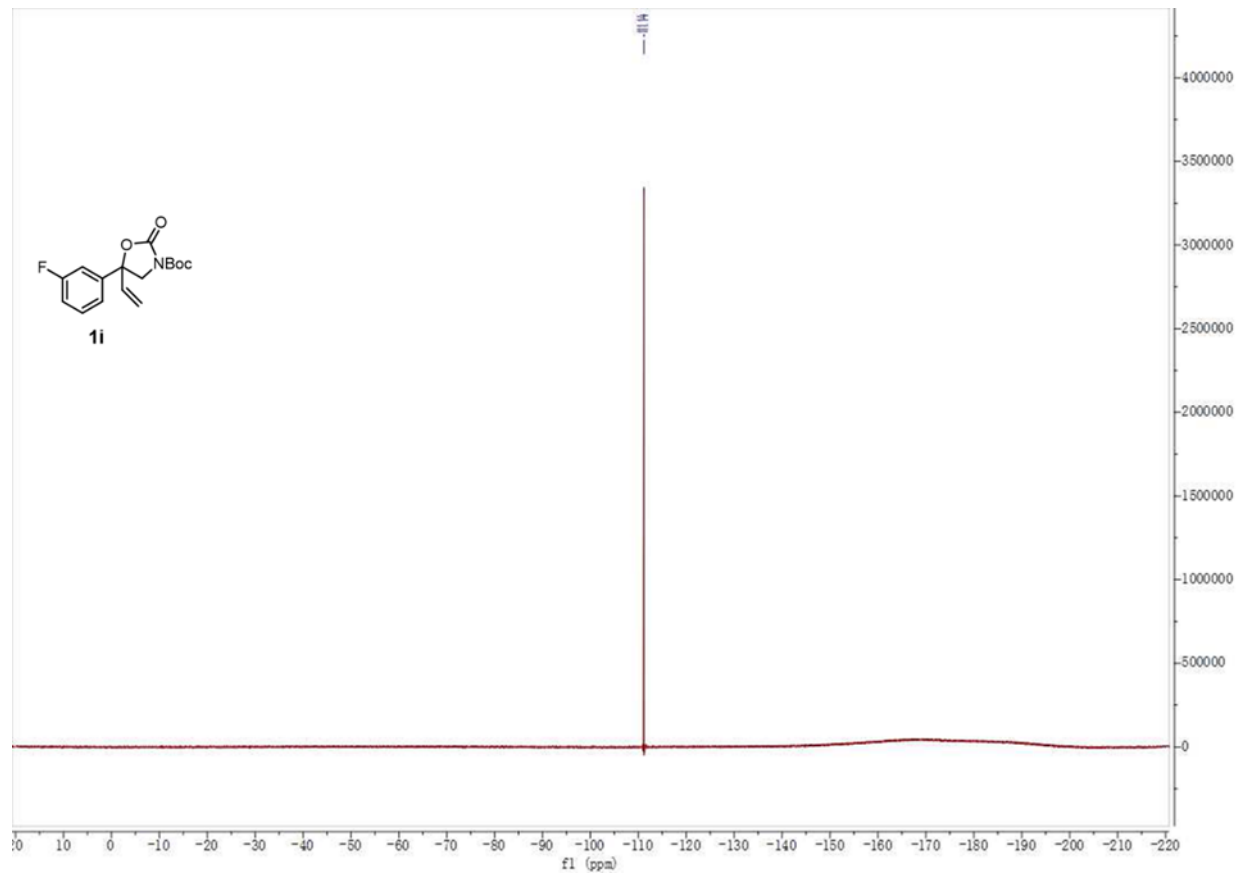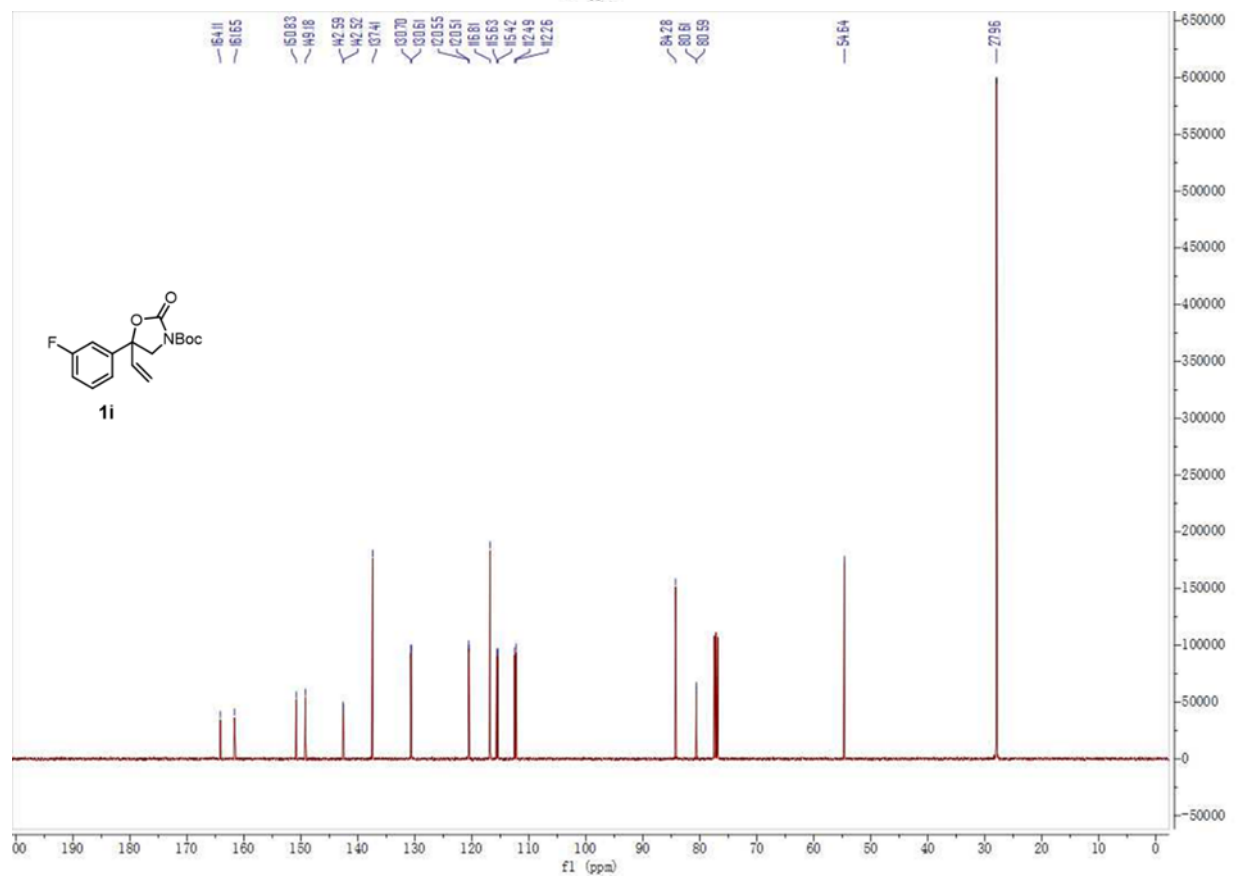



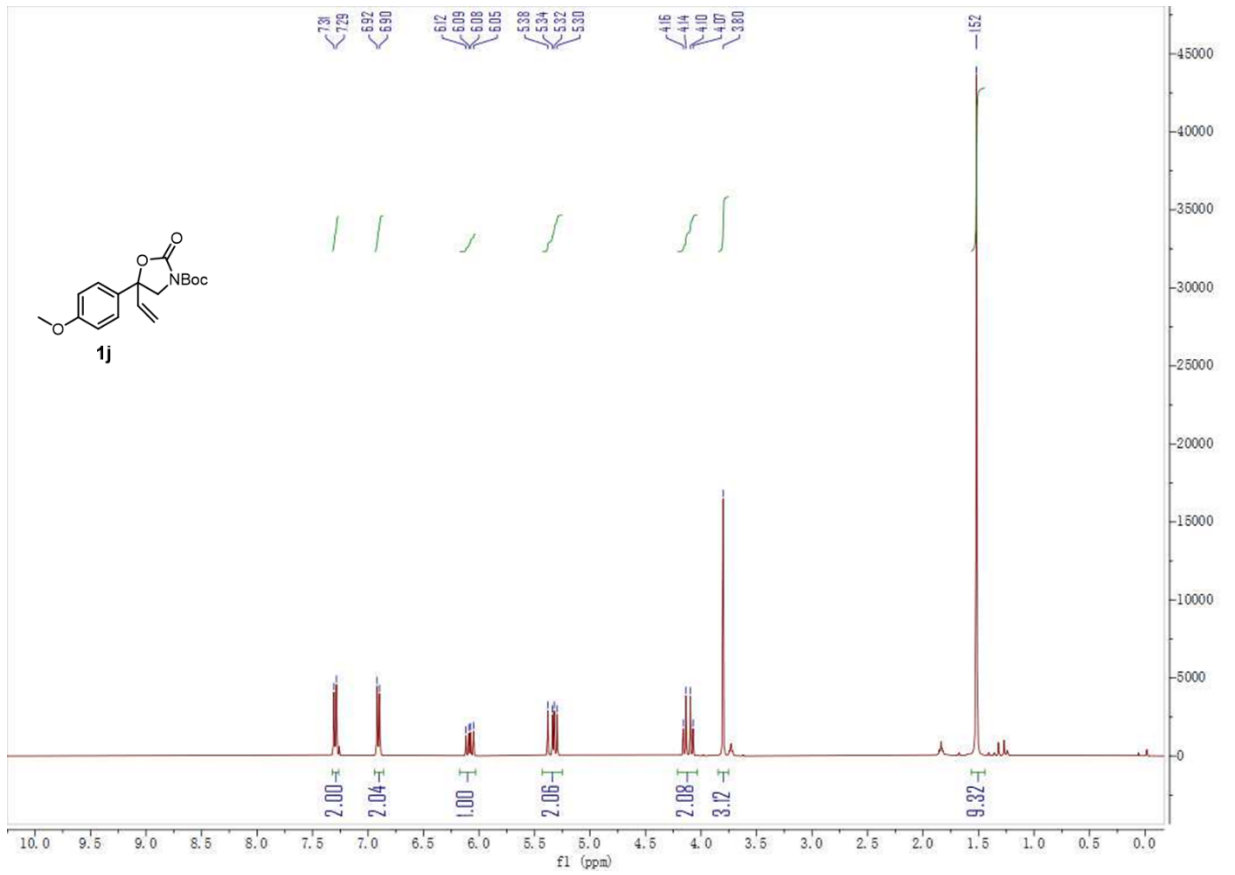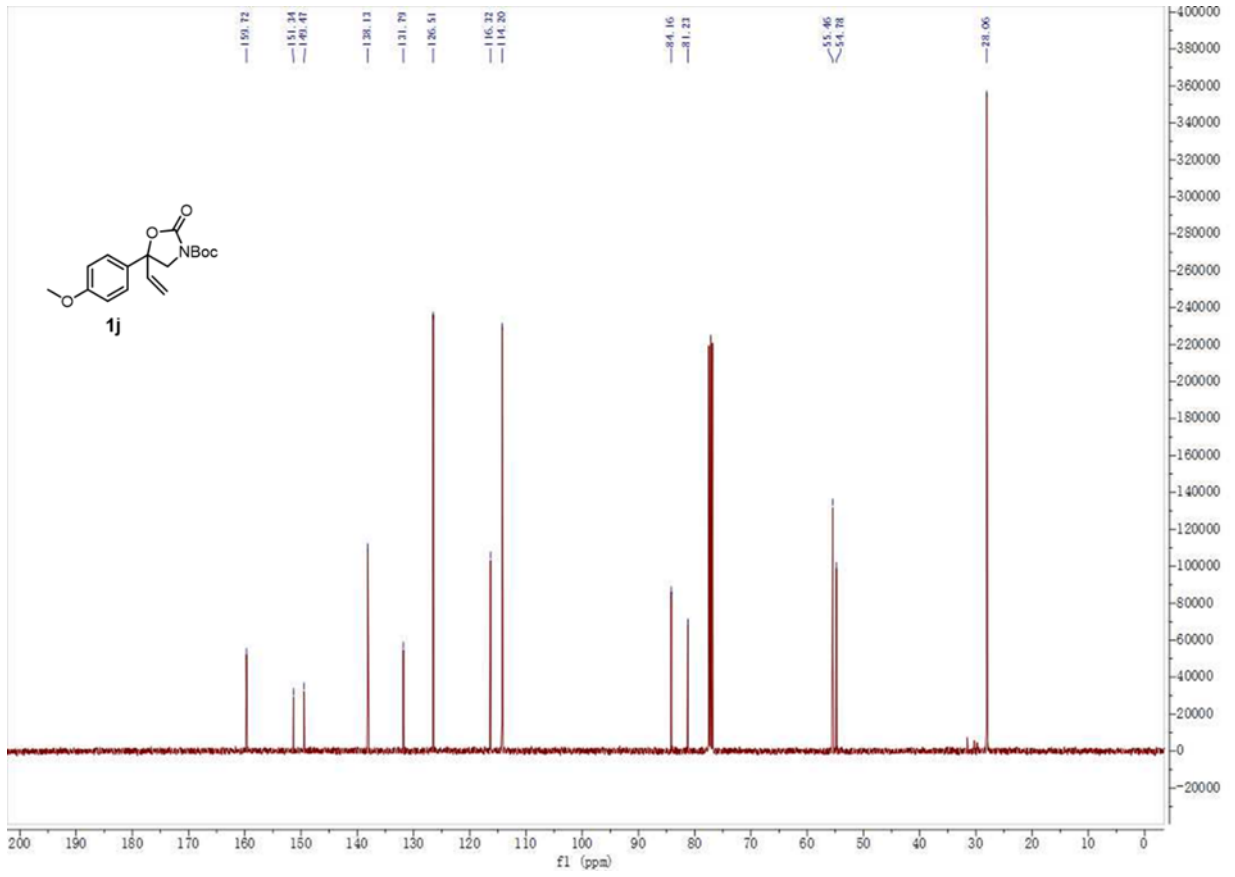

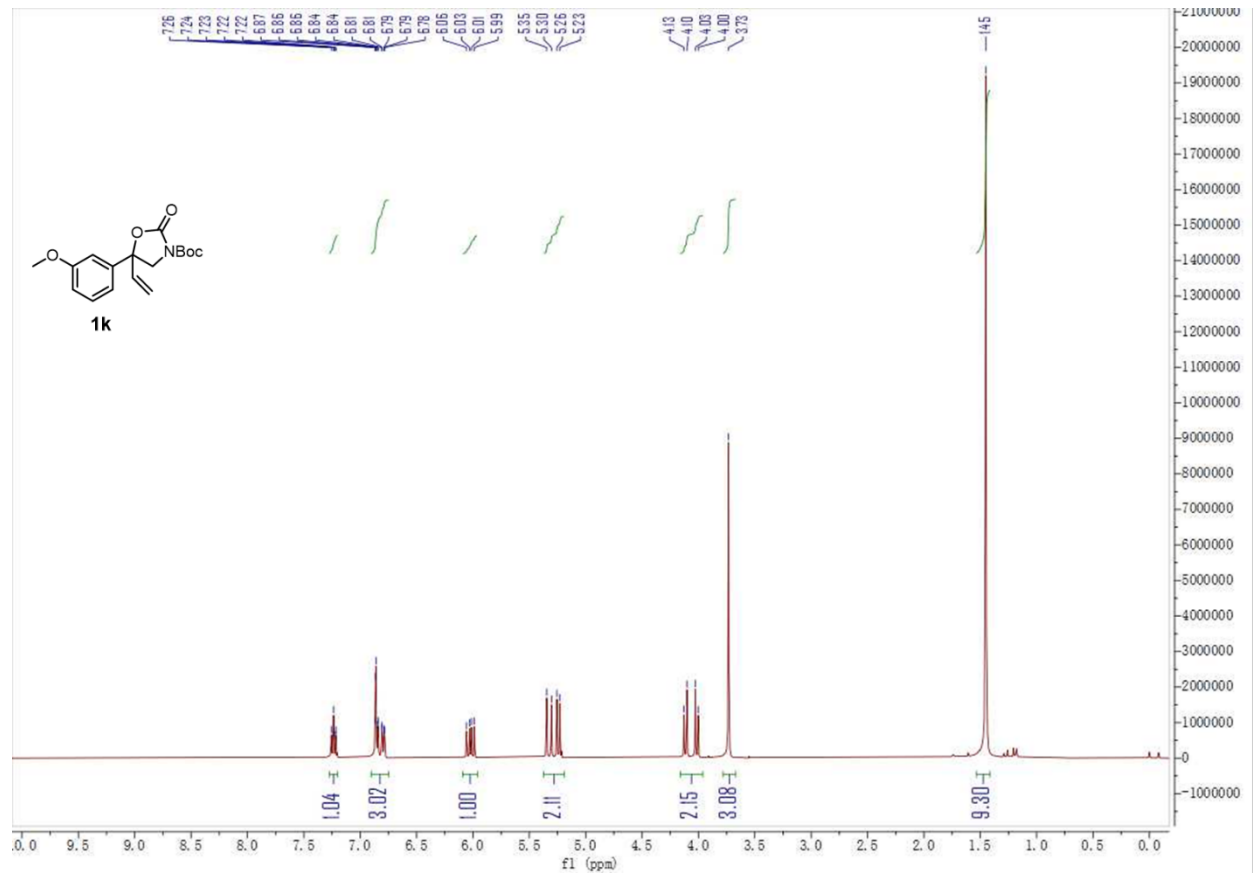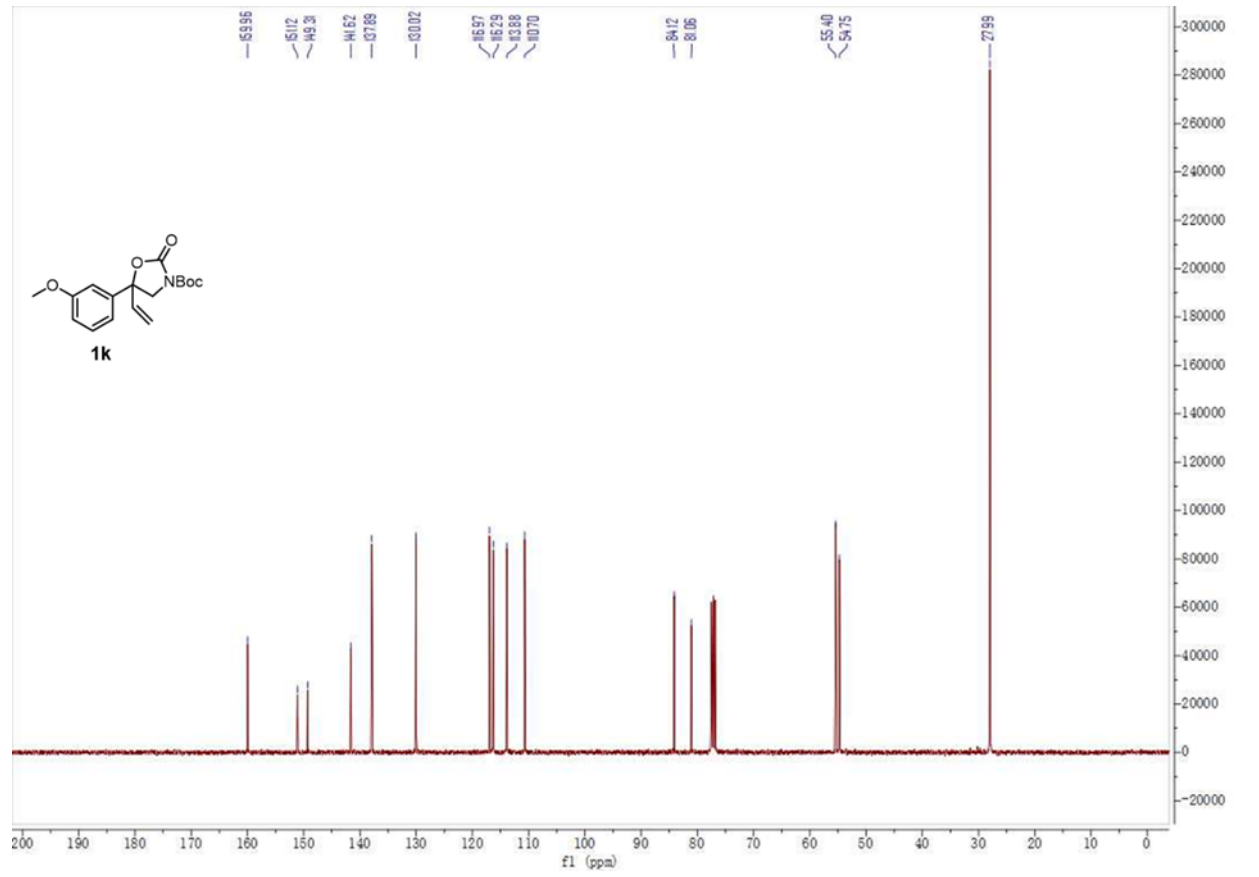

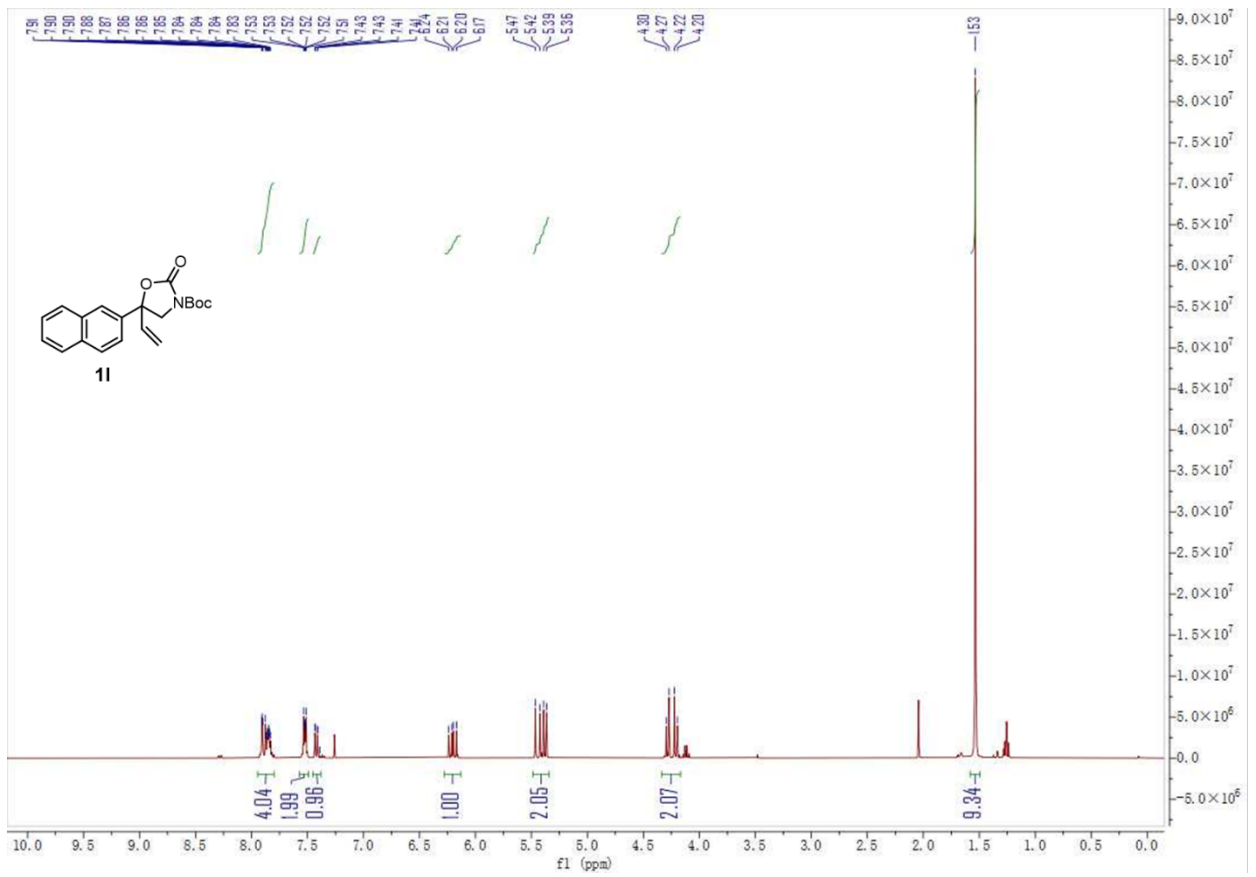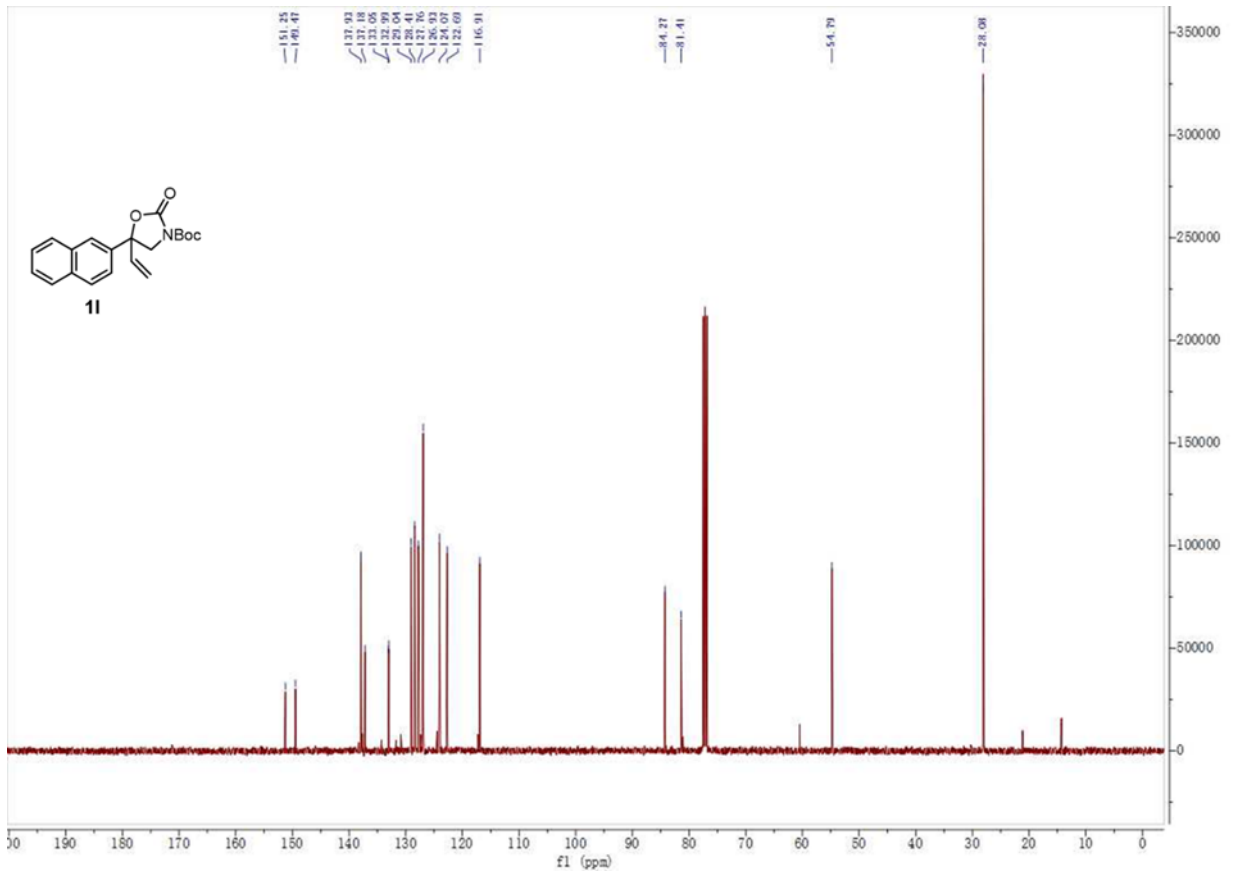

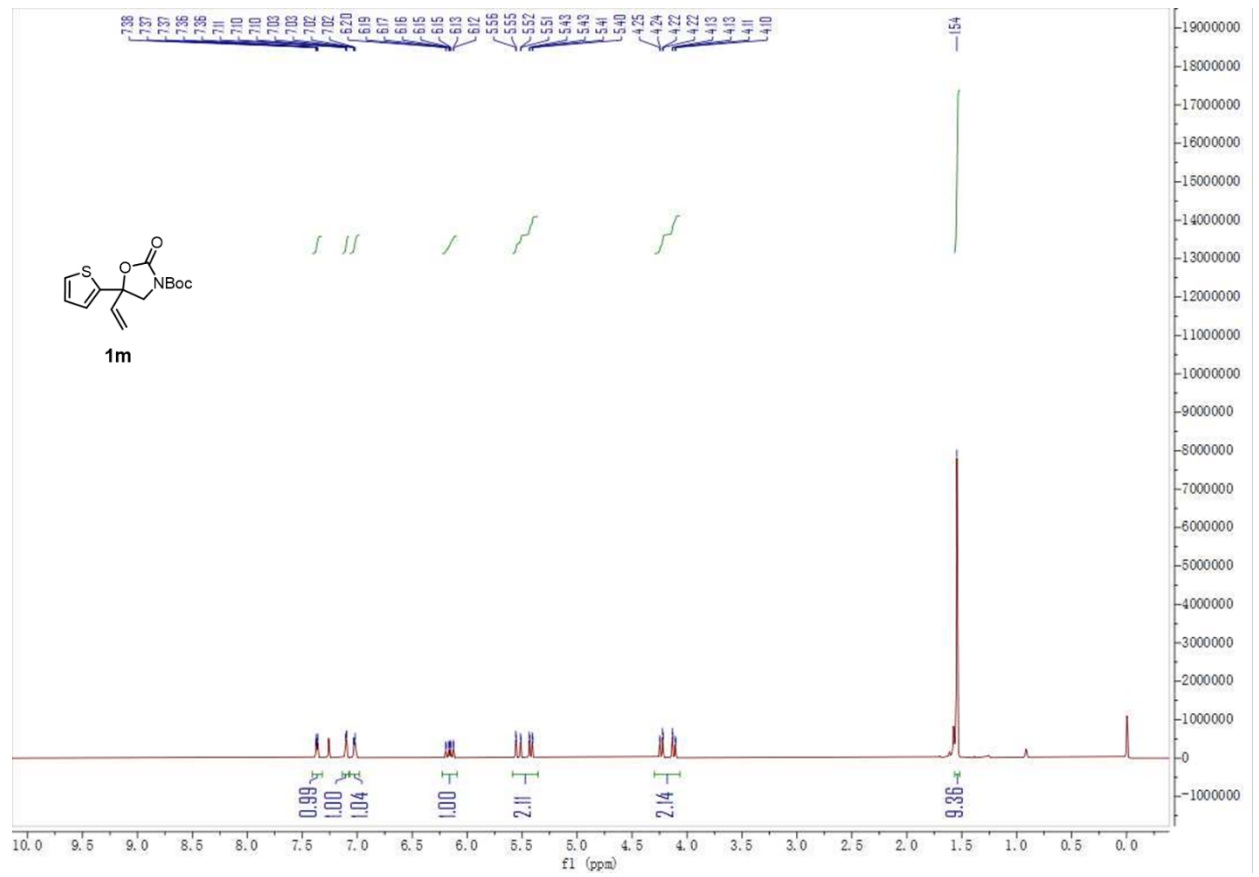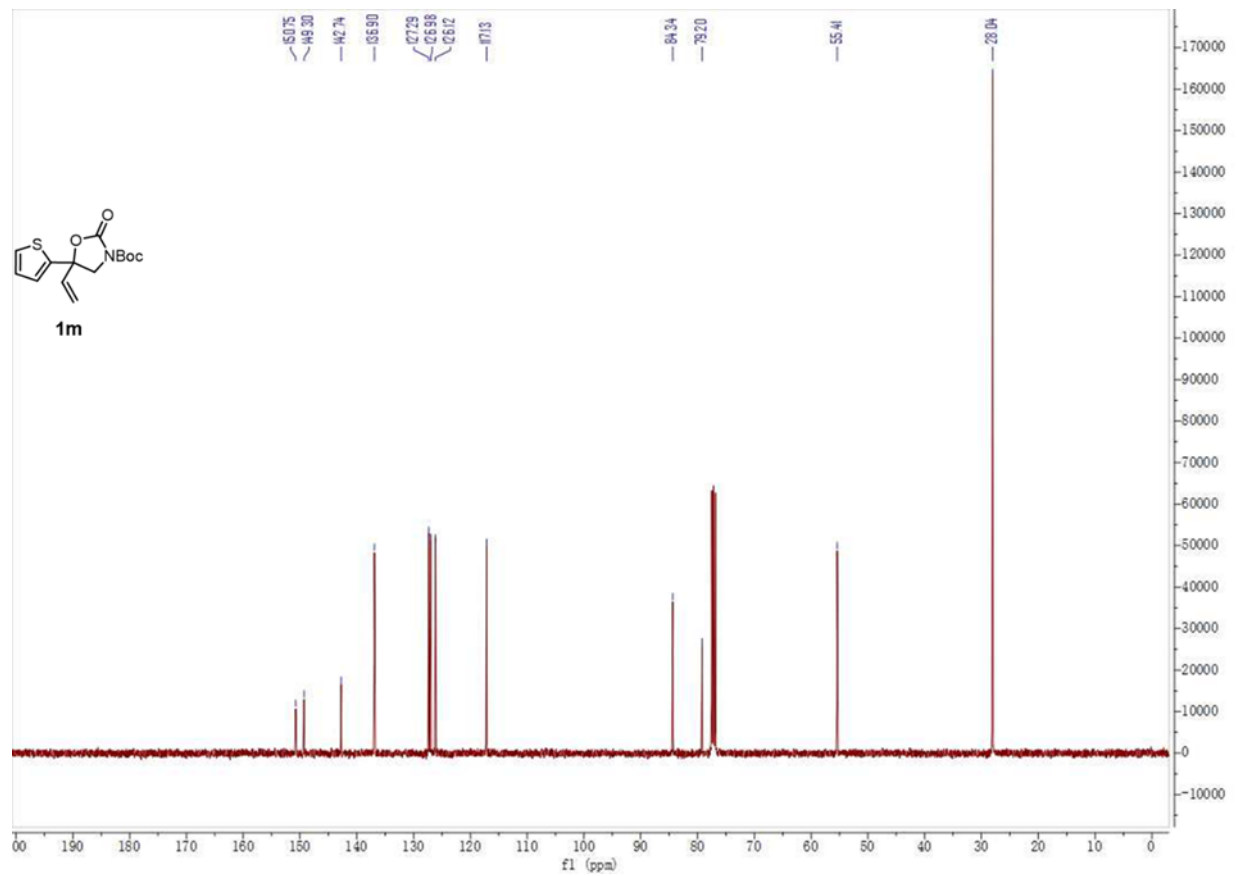

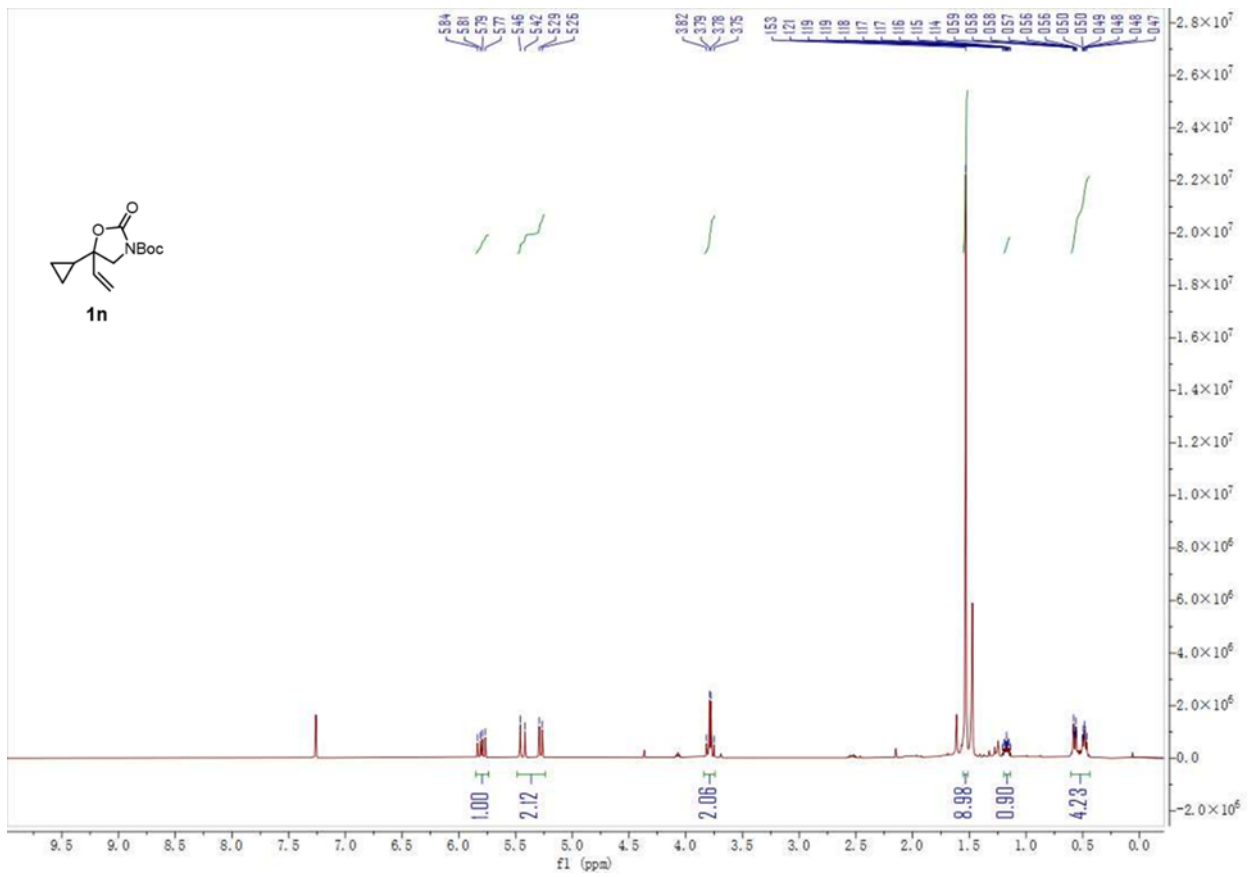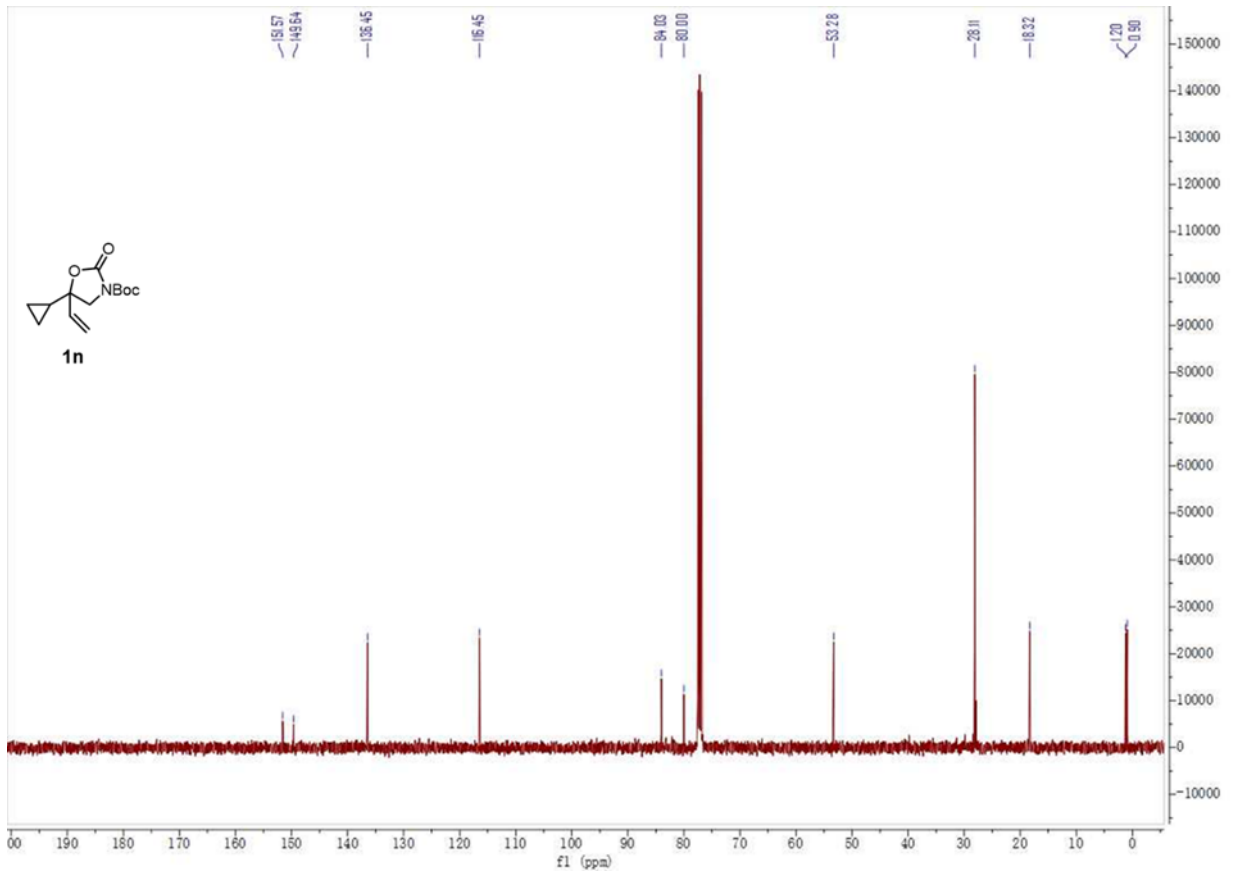

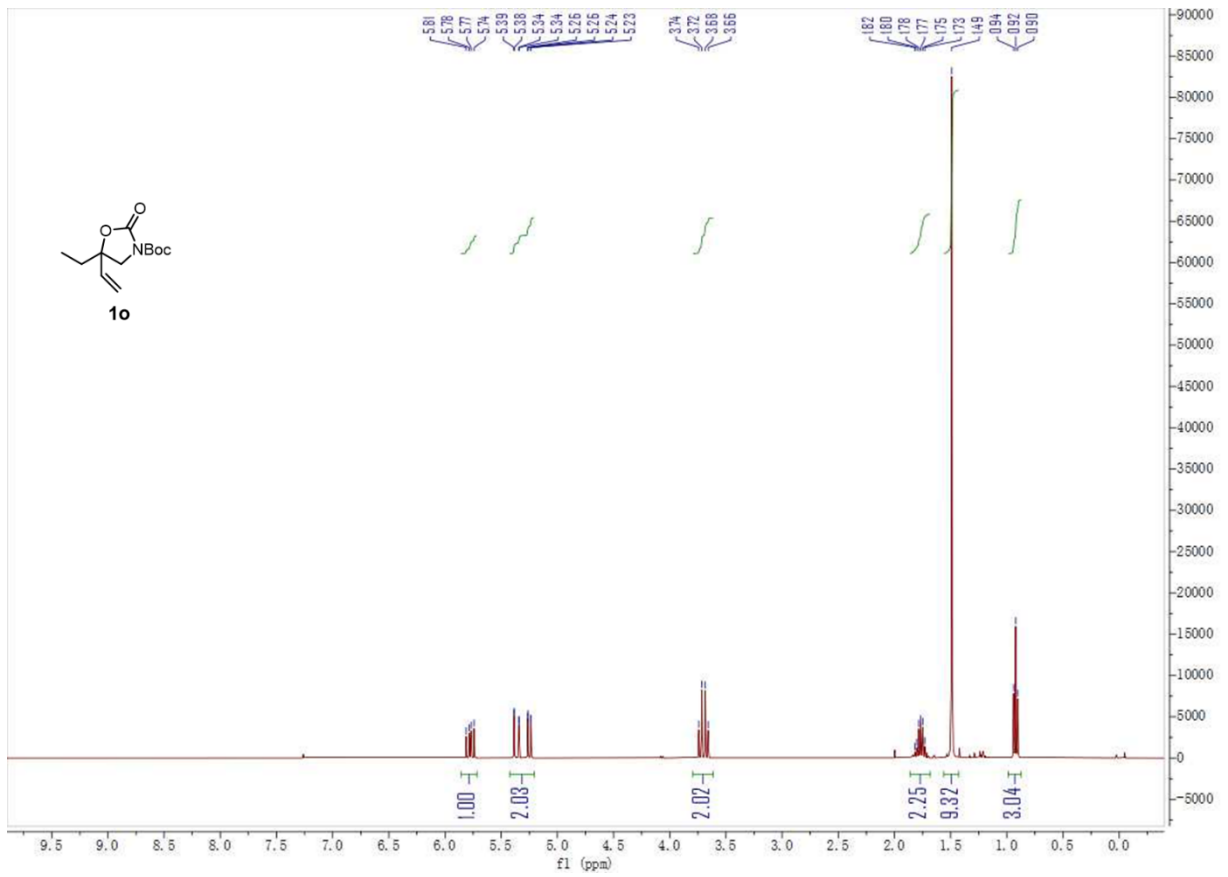

65

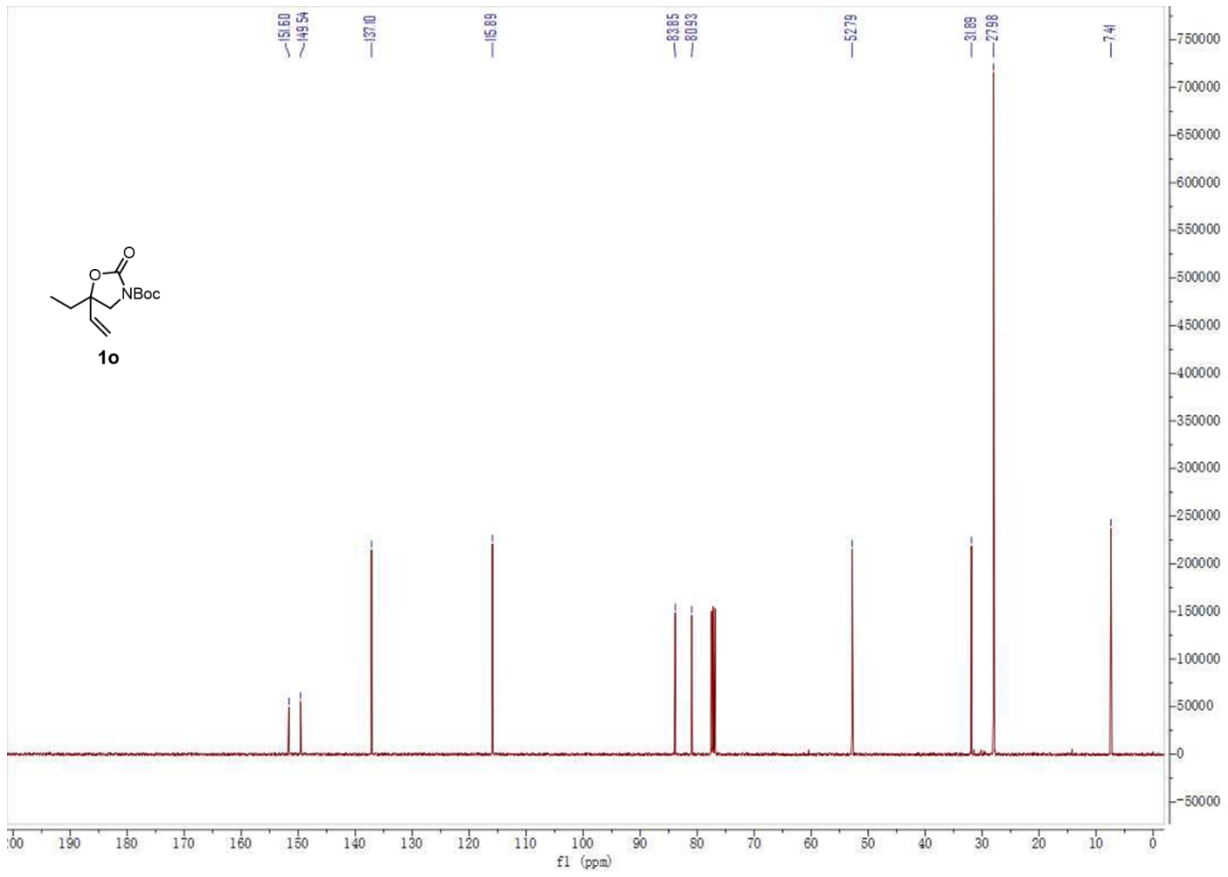

66

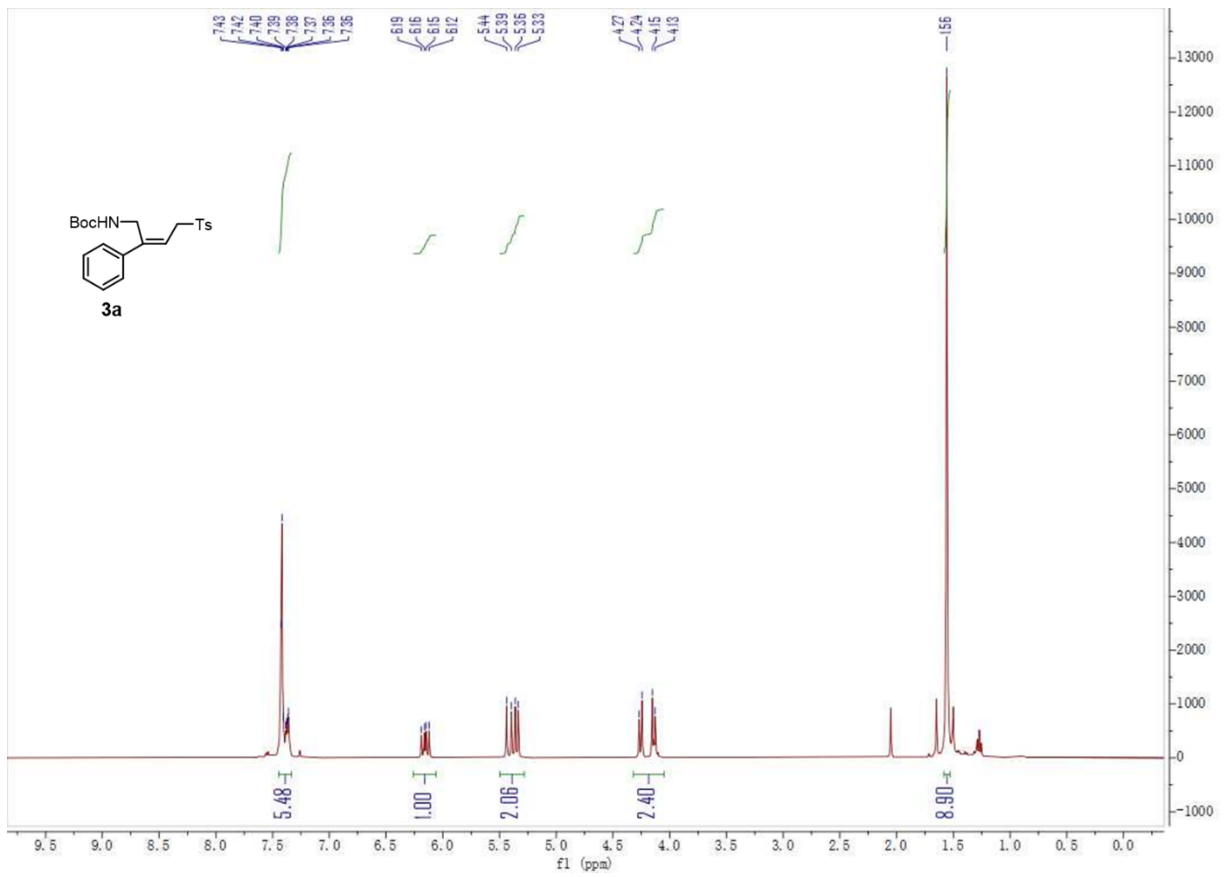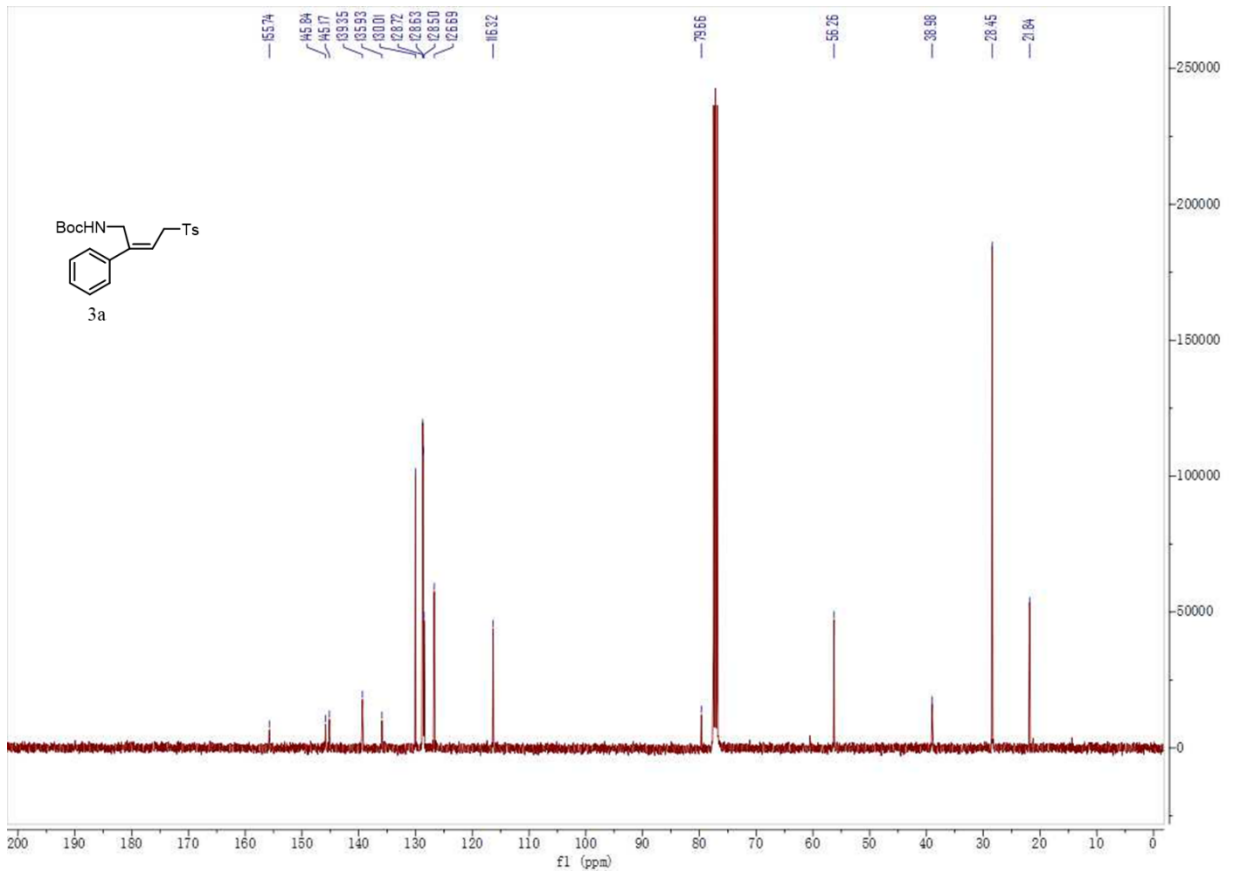

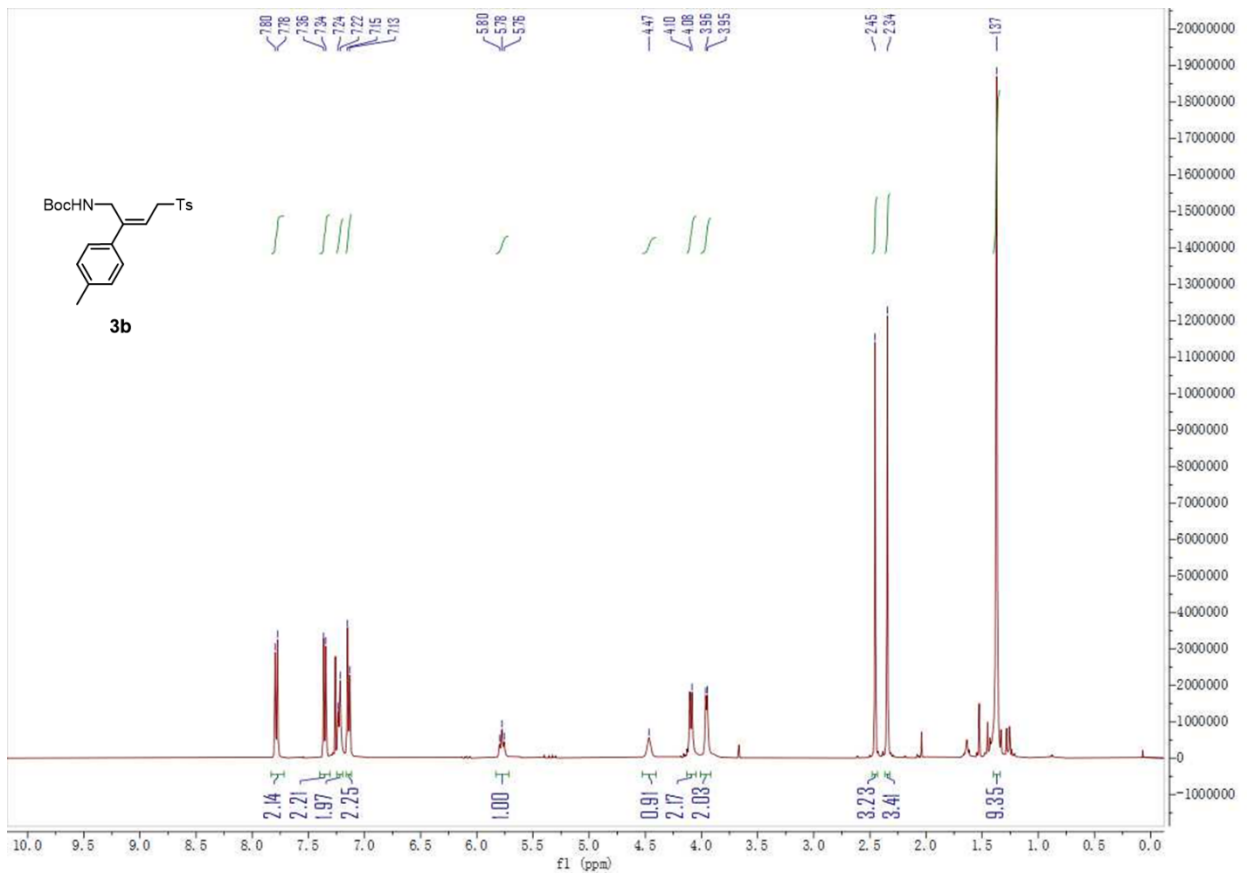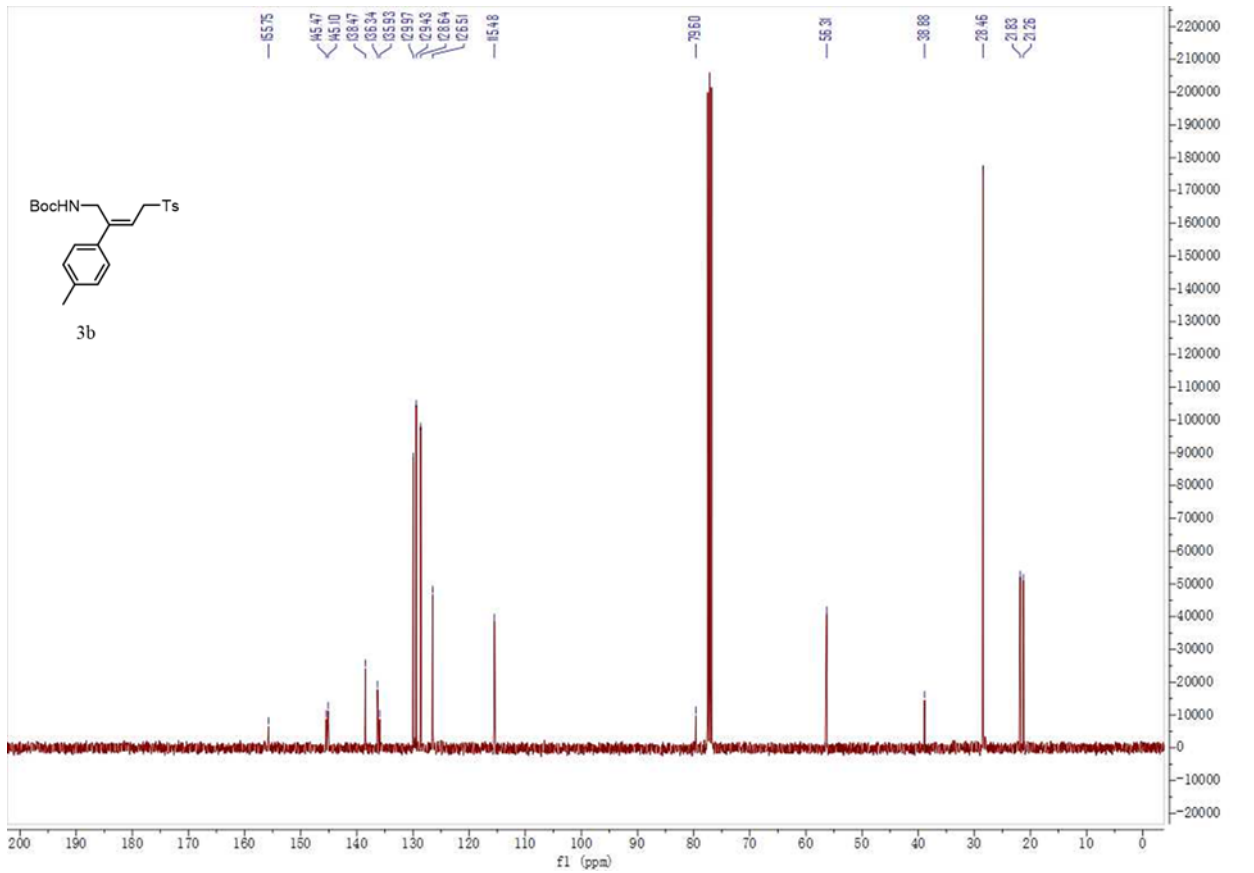



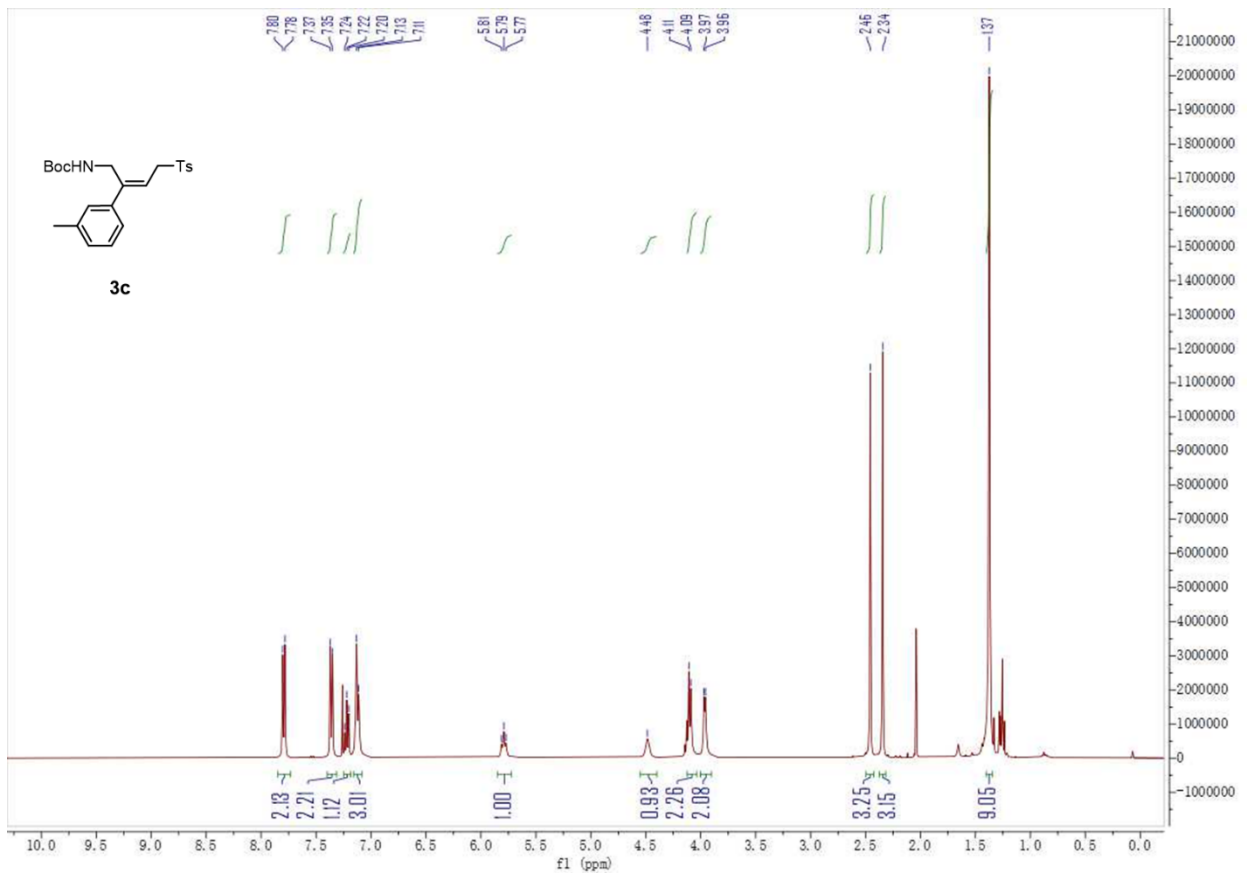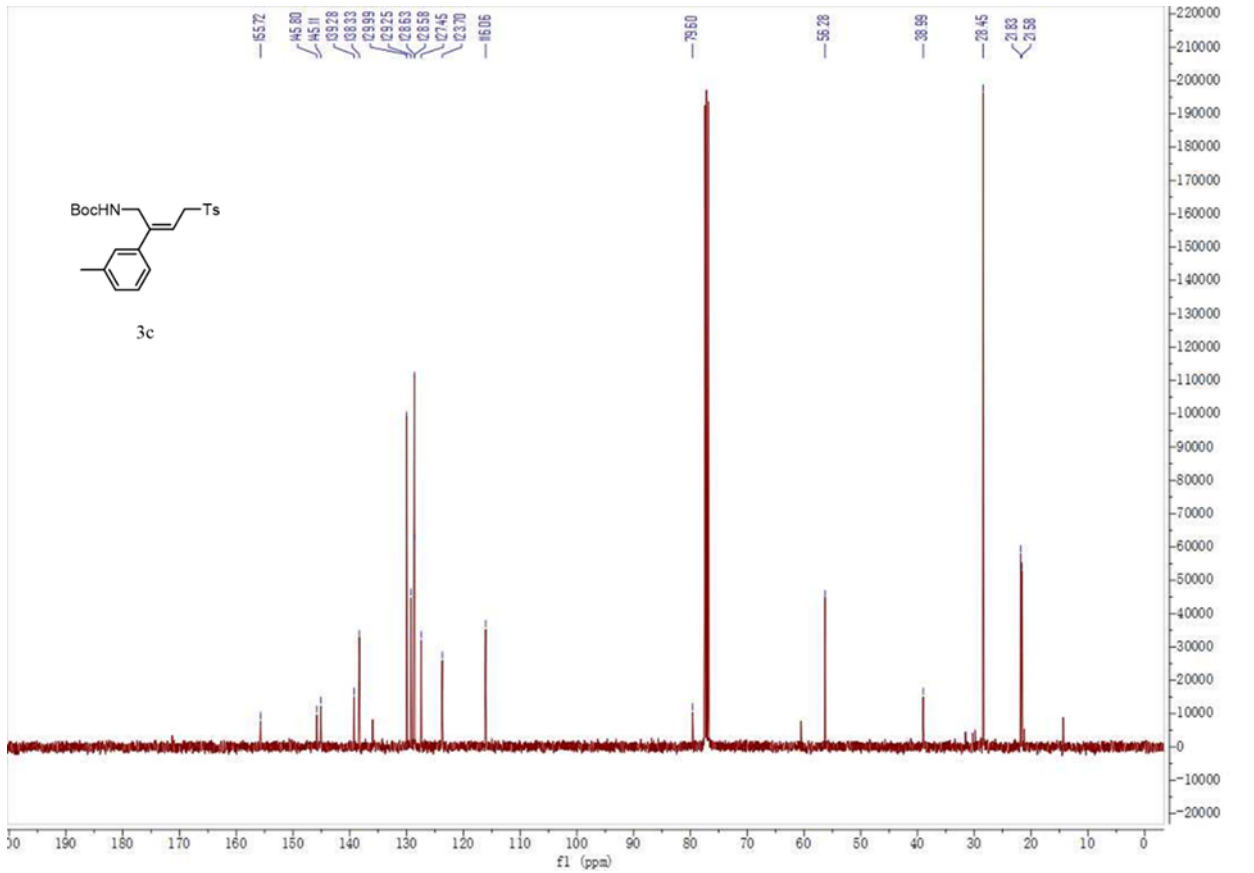

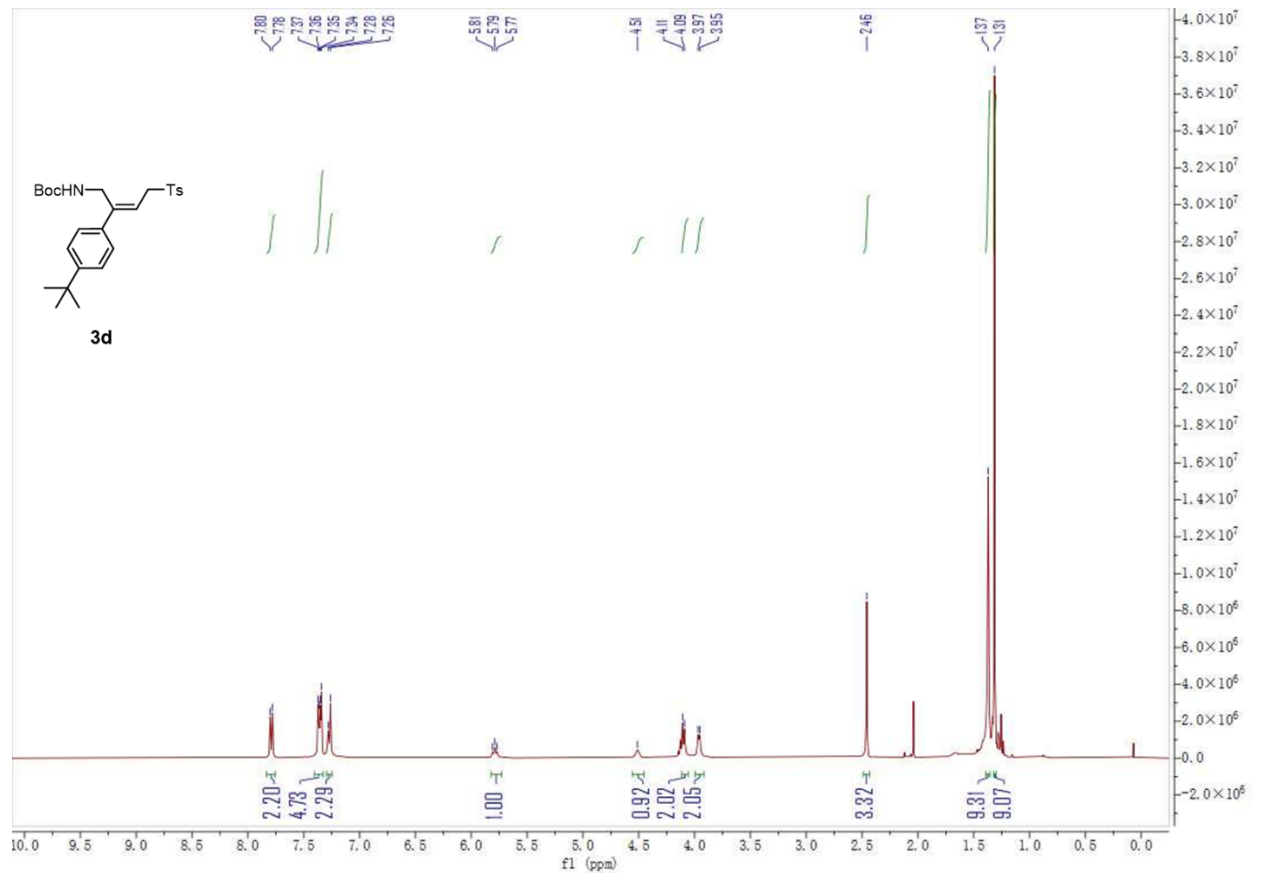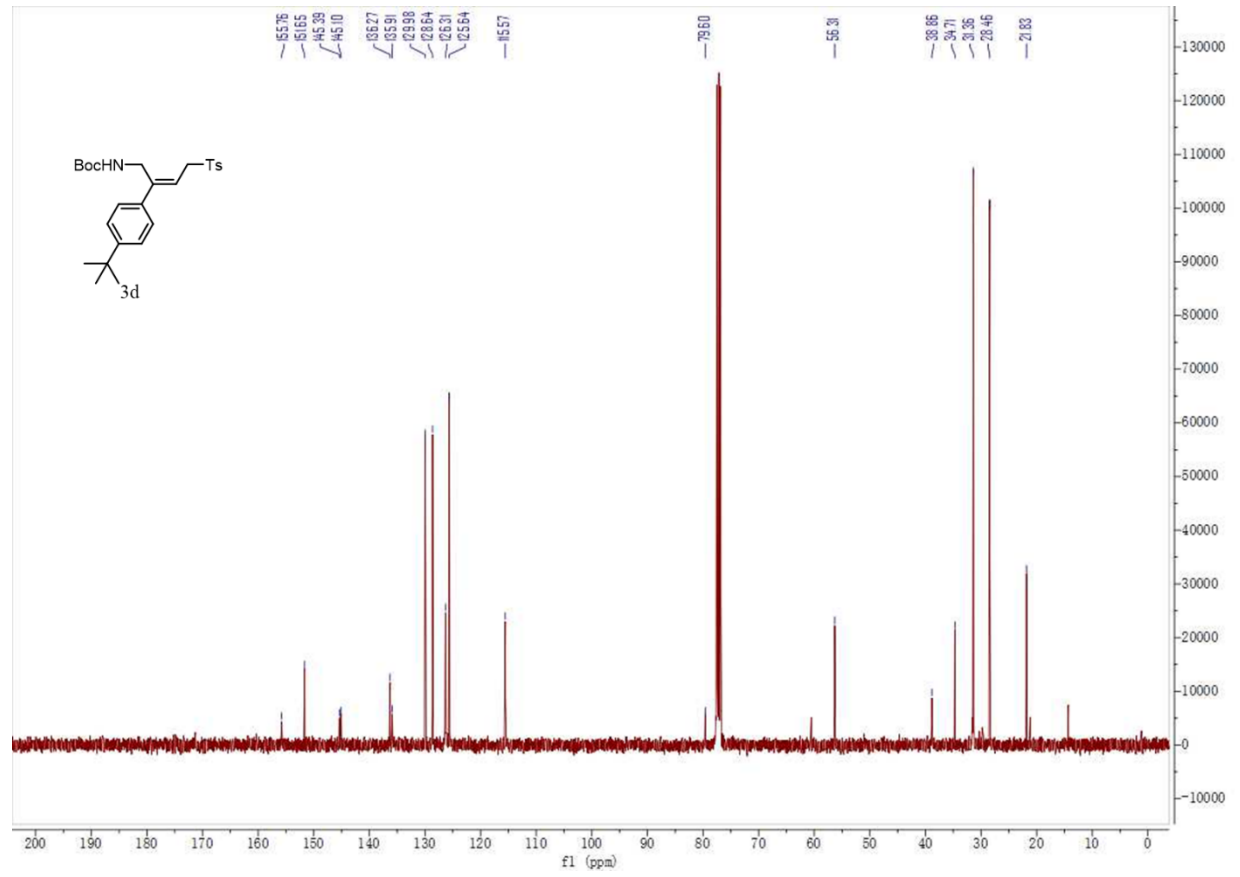

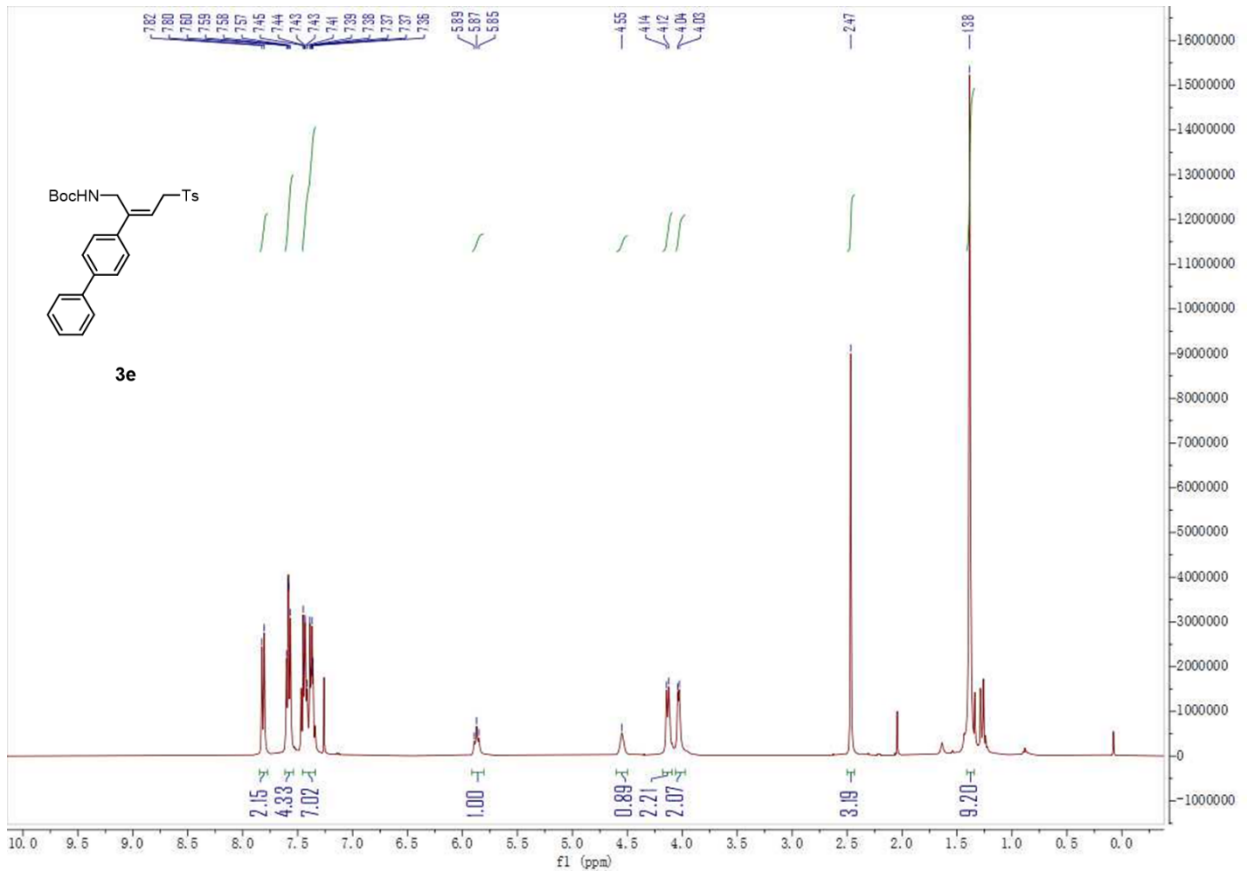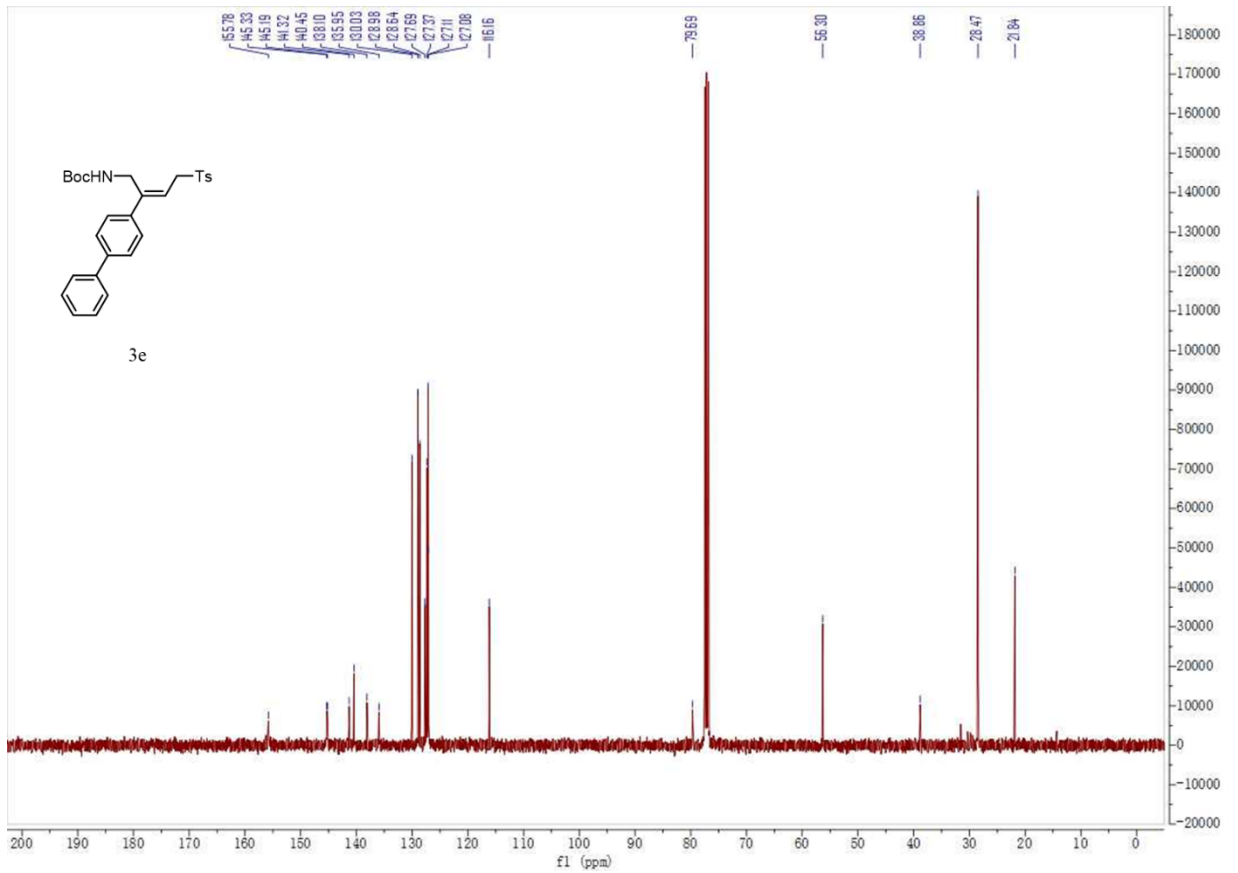

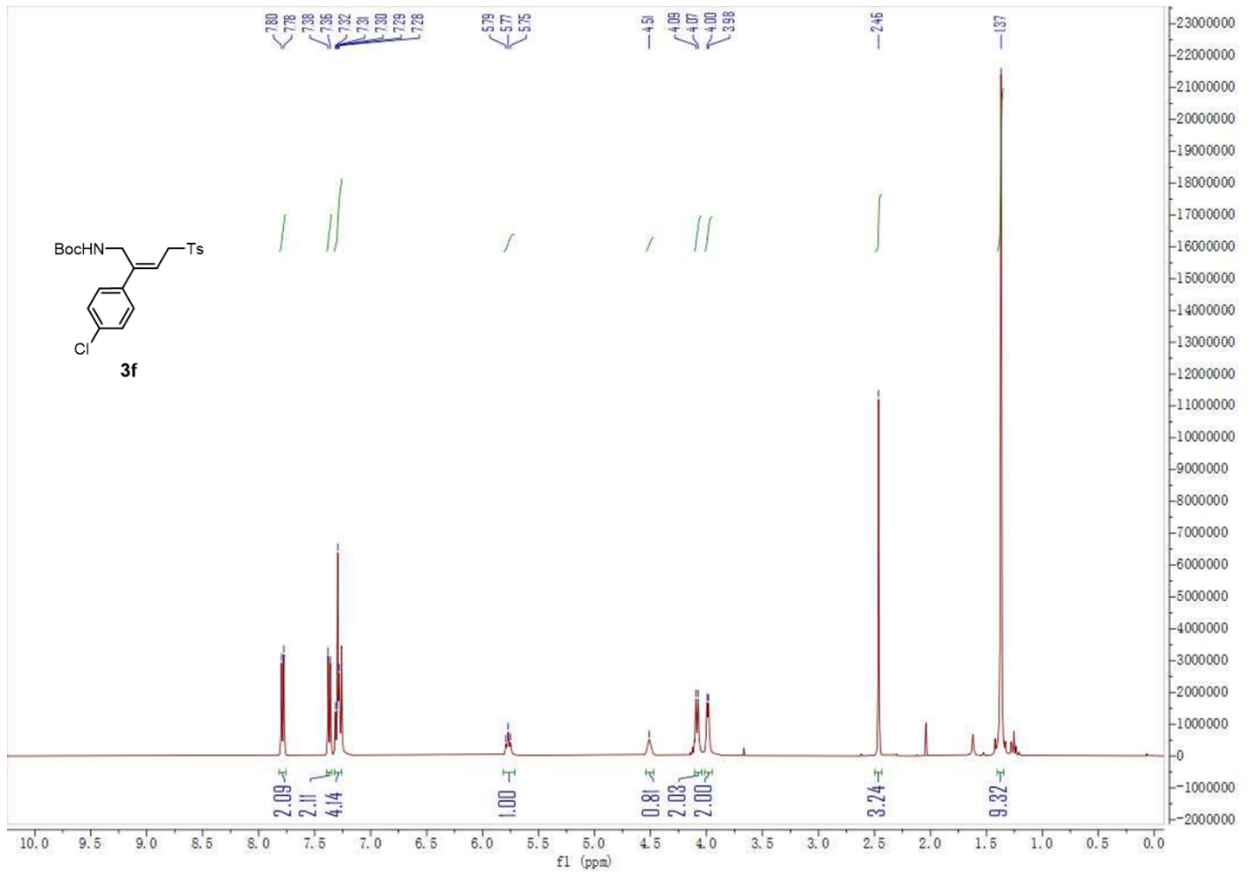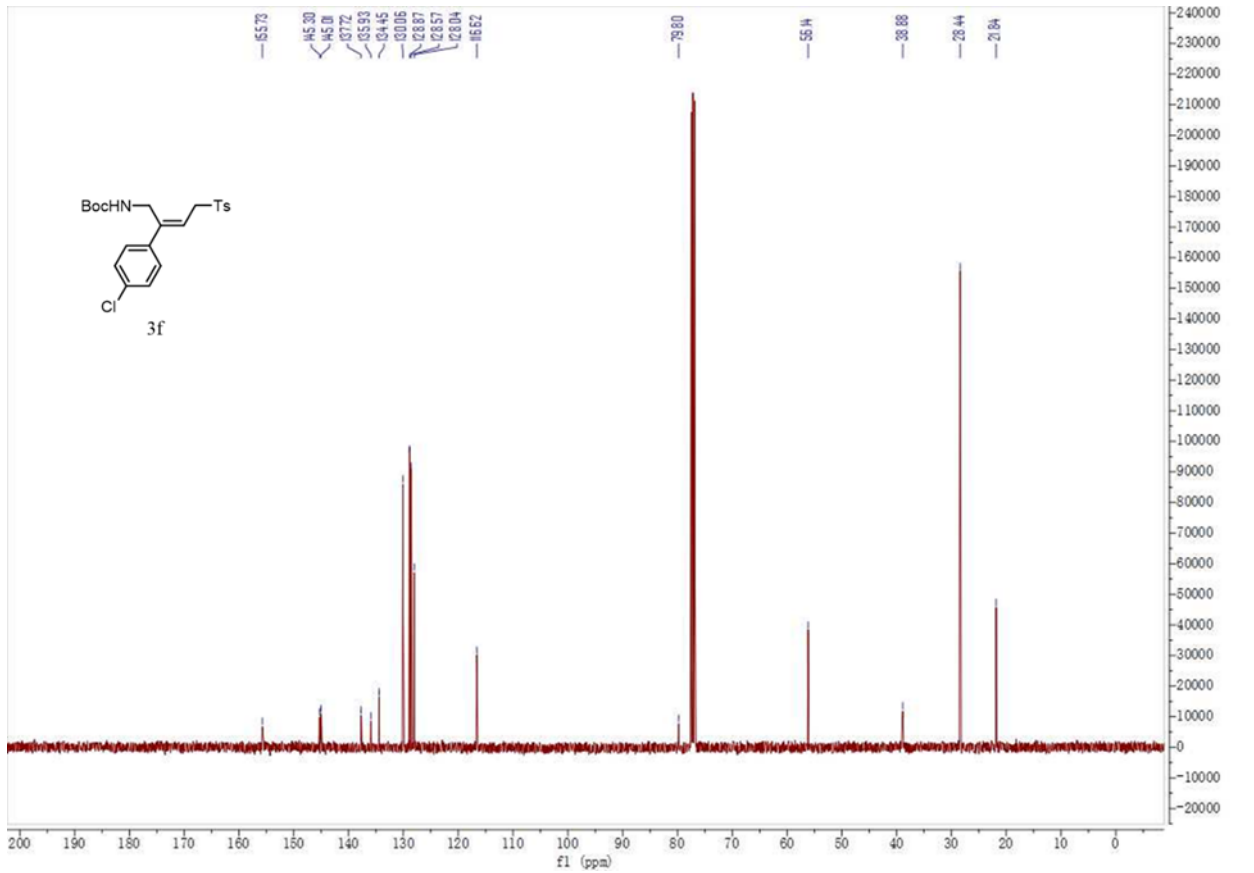

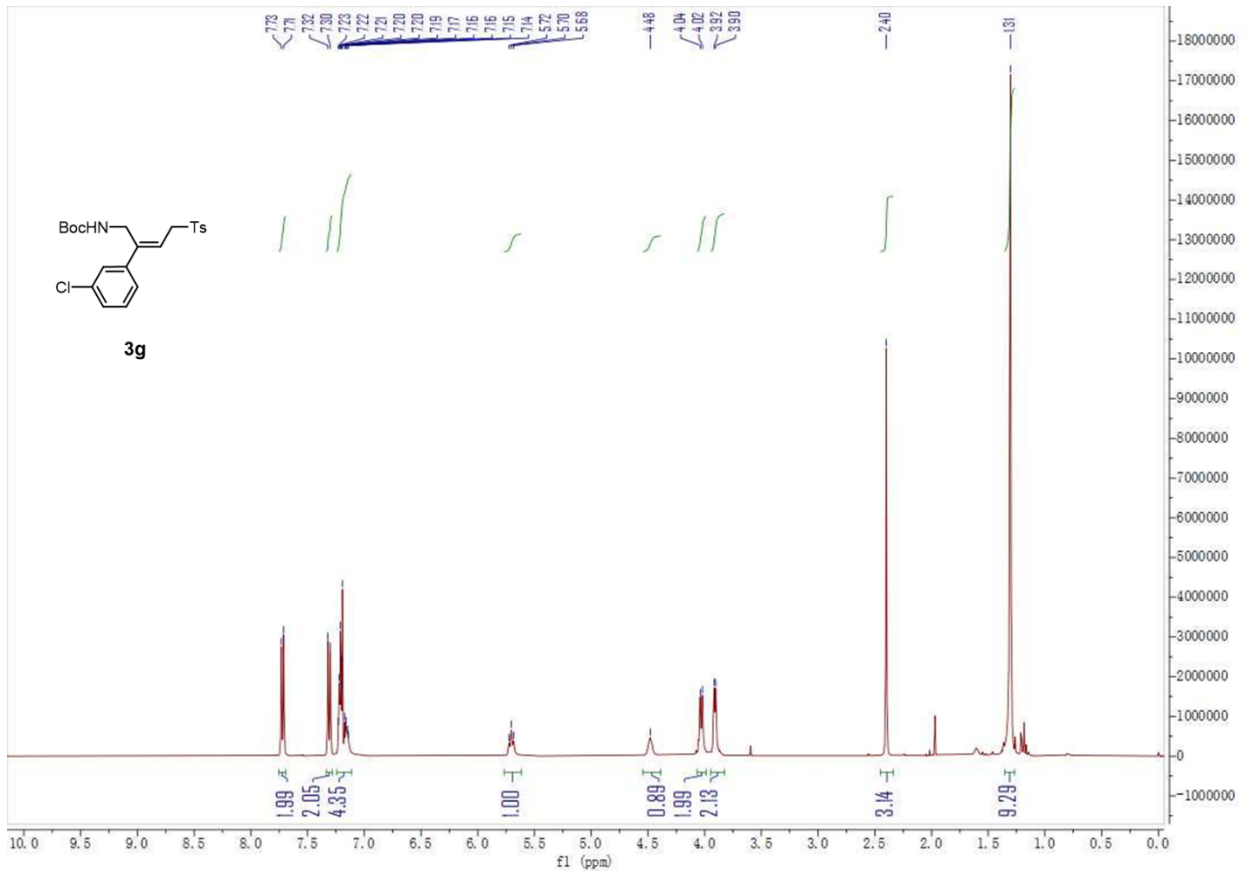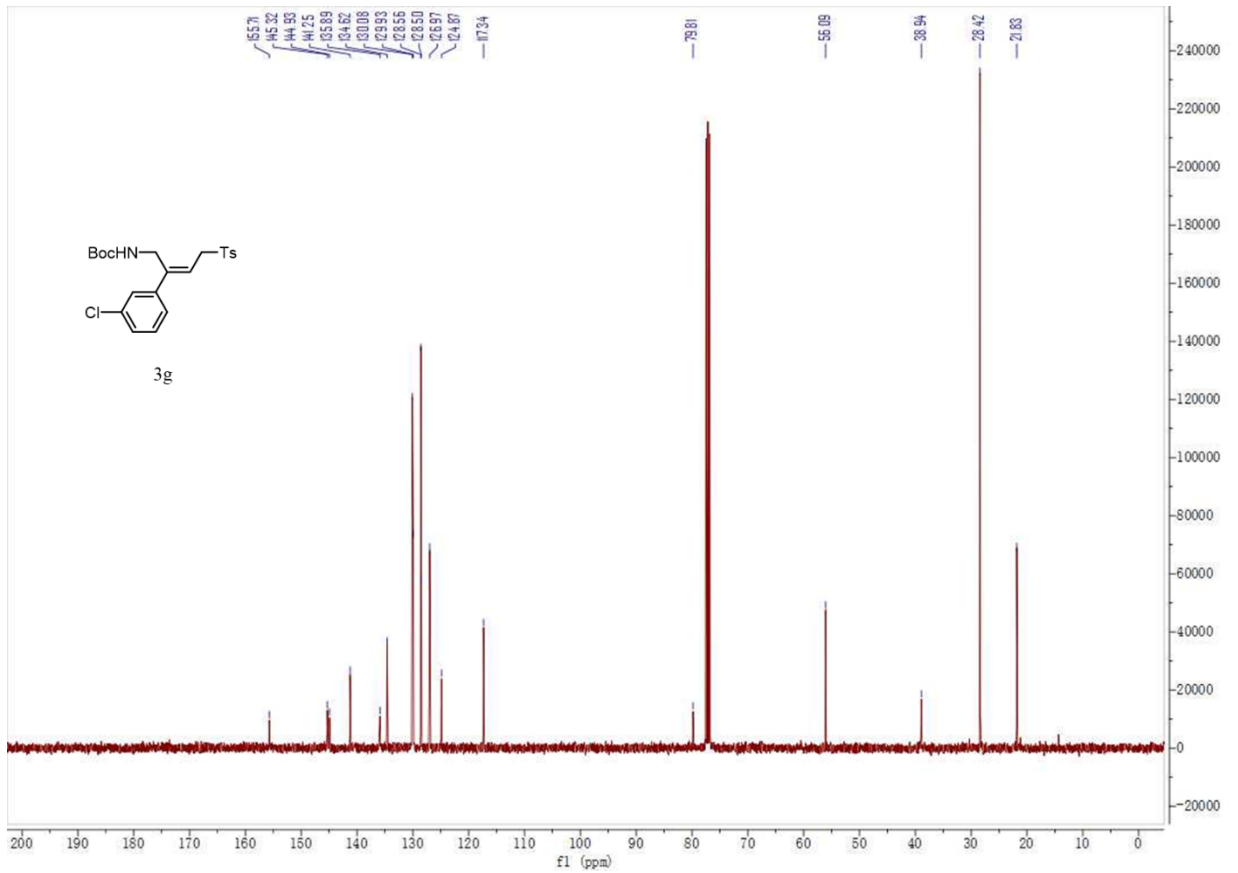

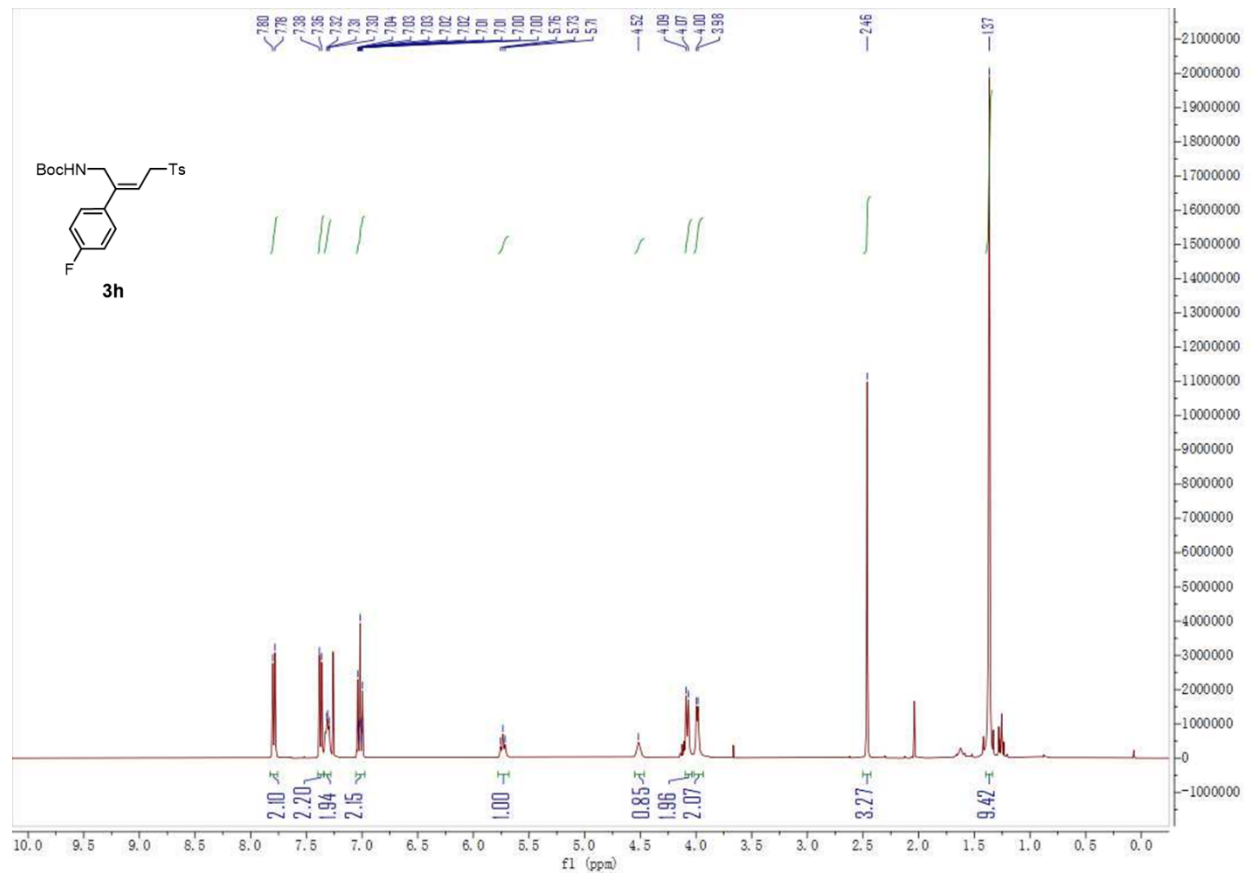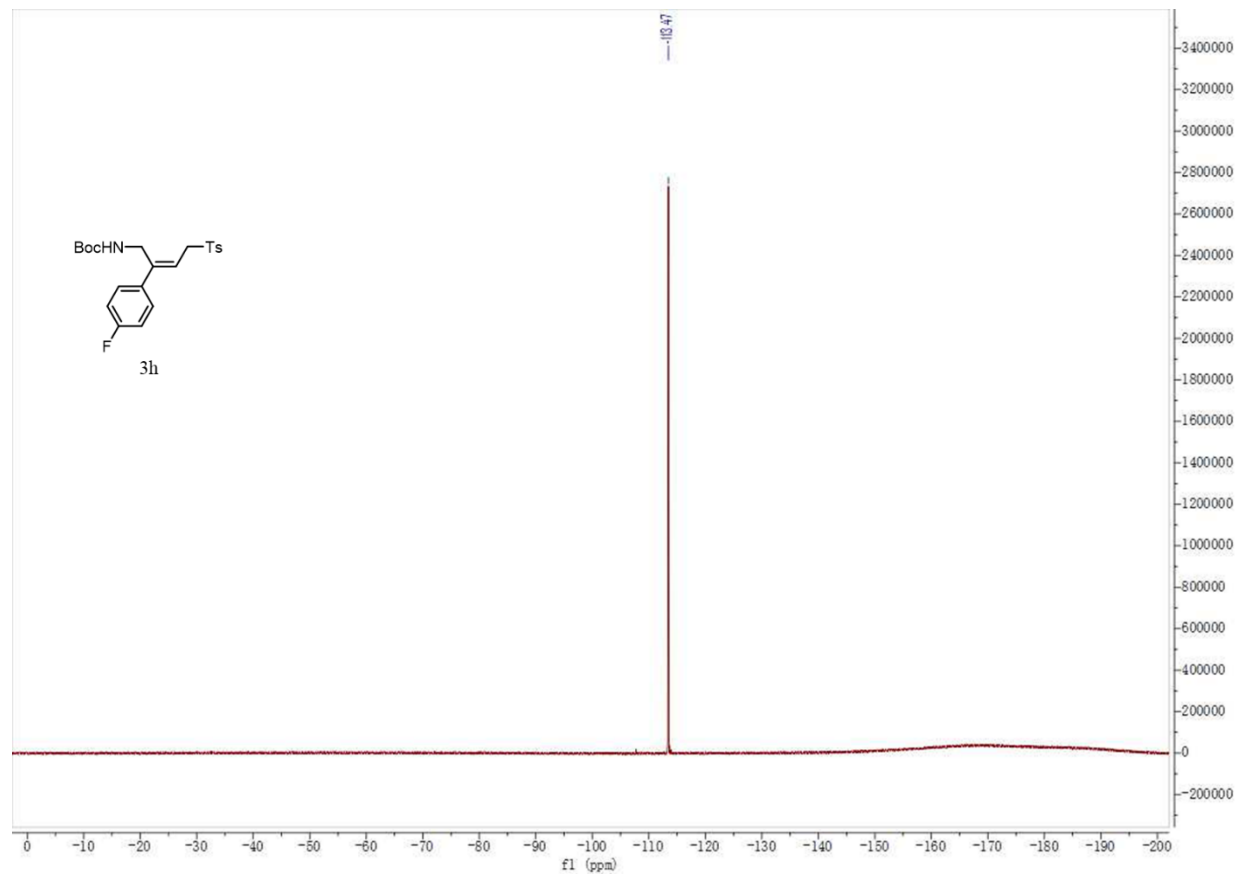

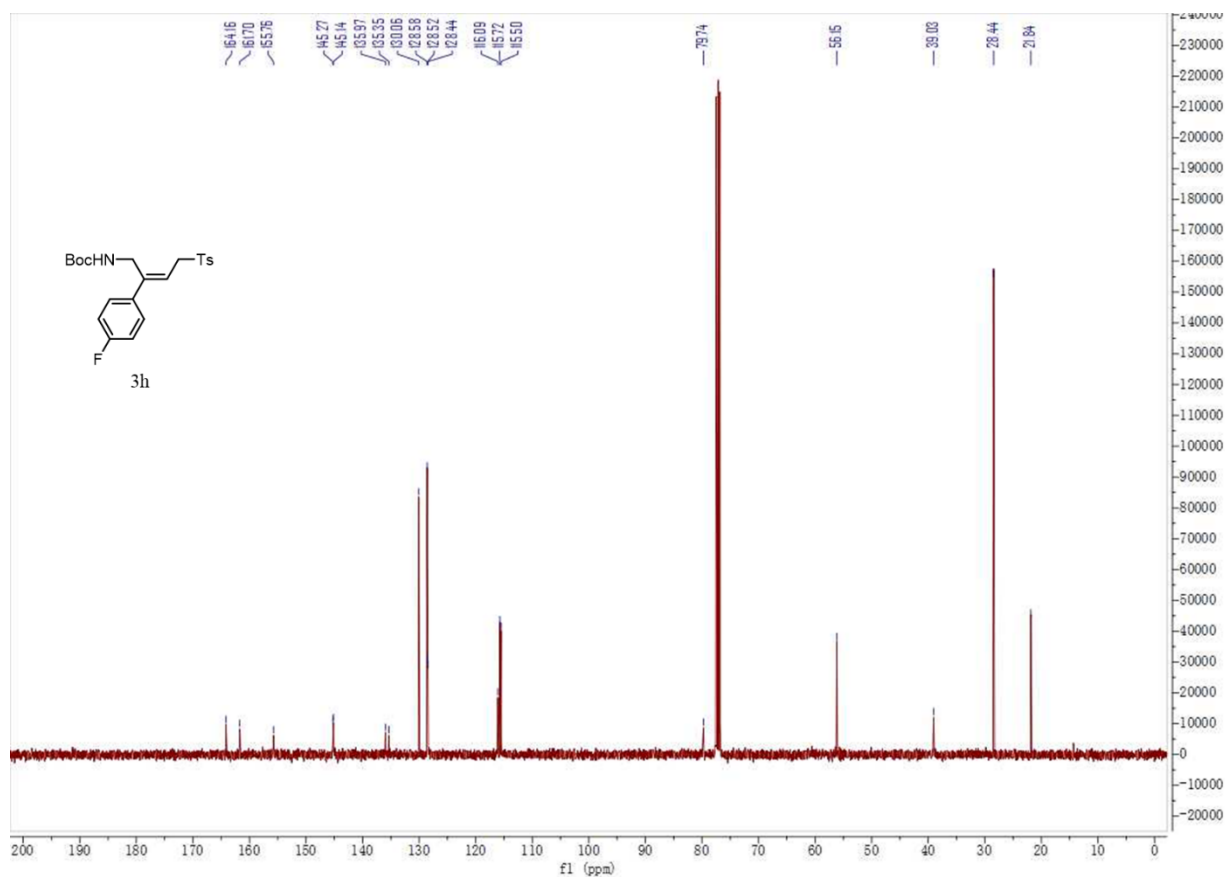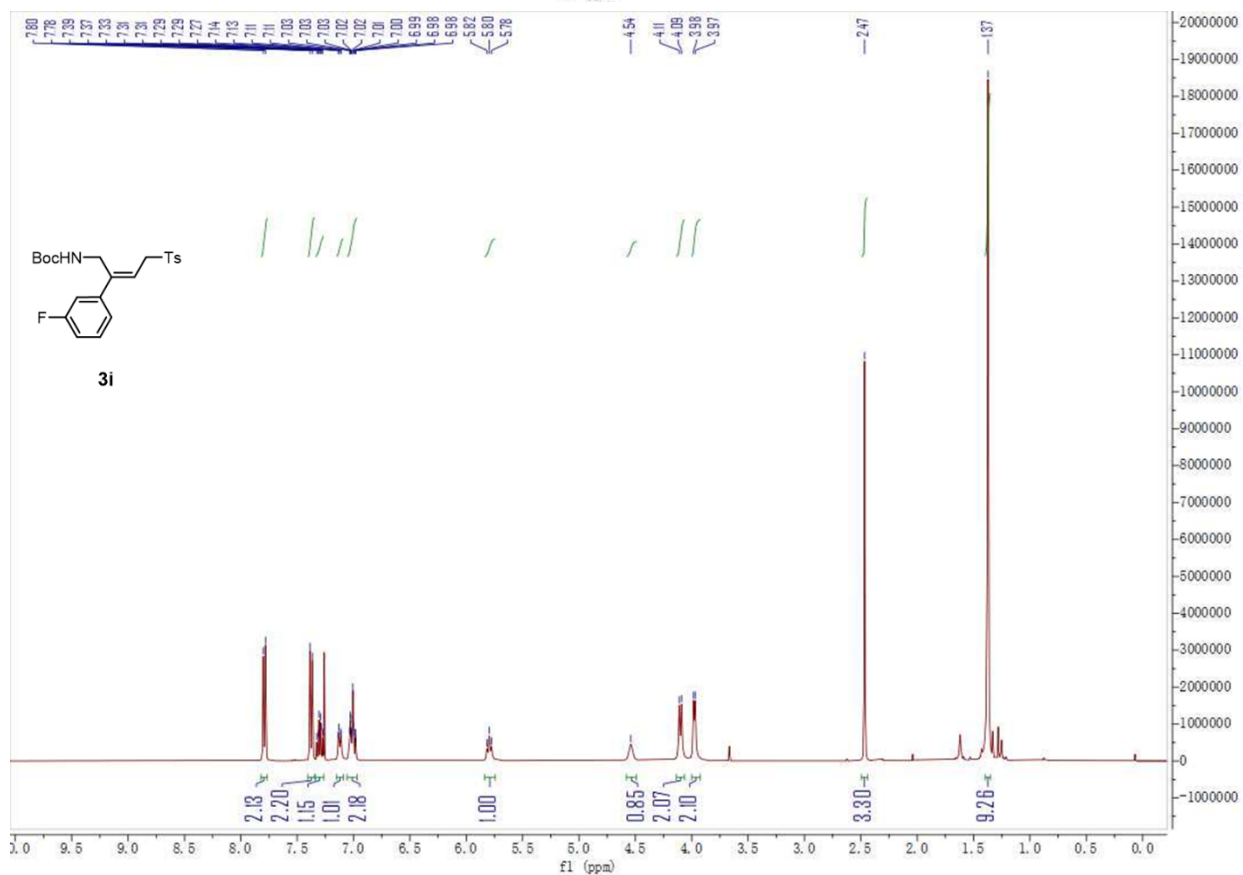

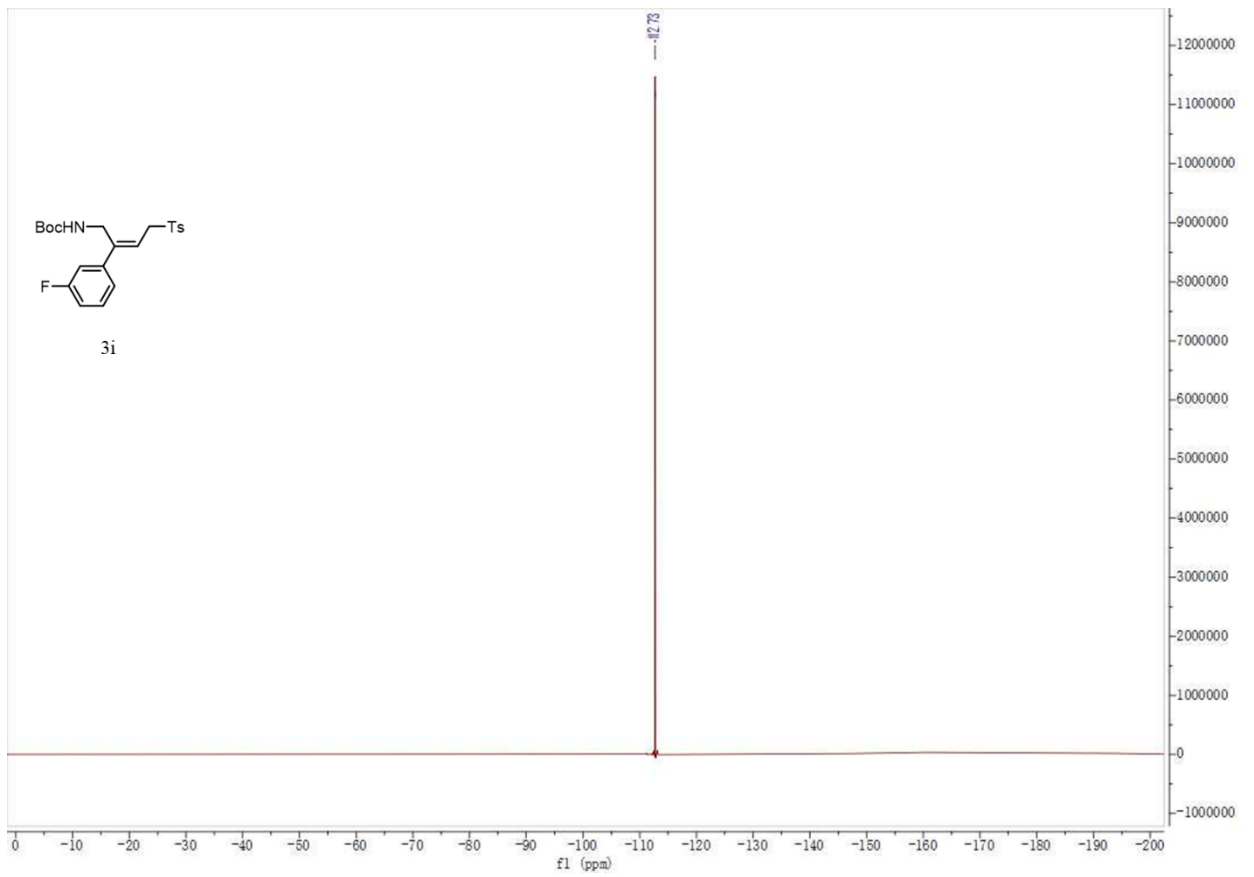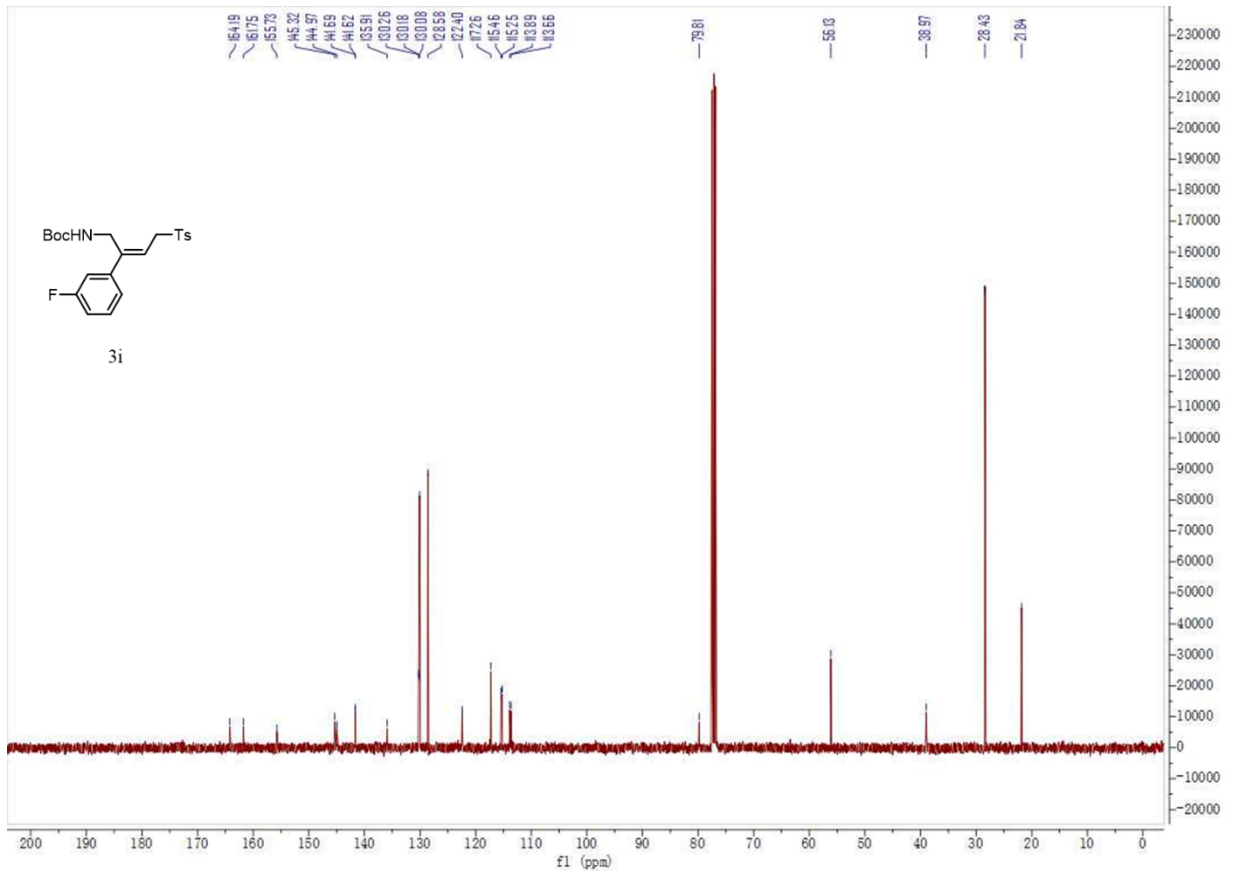



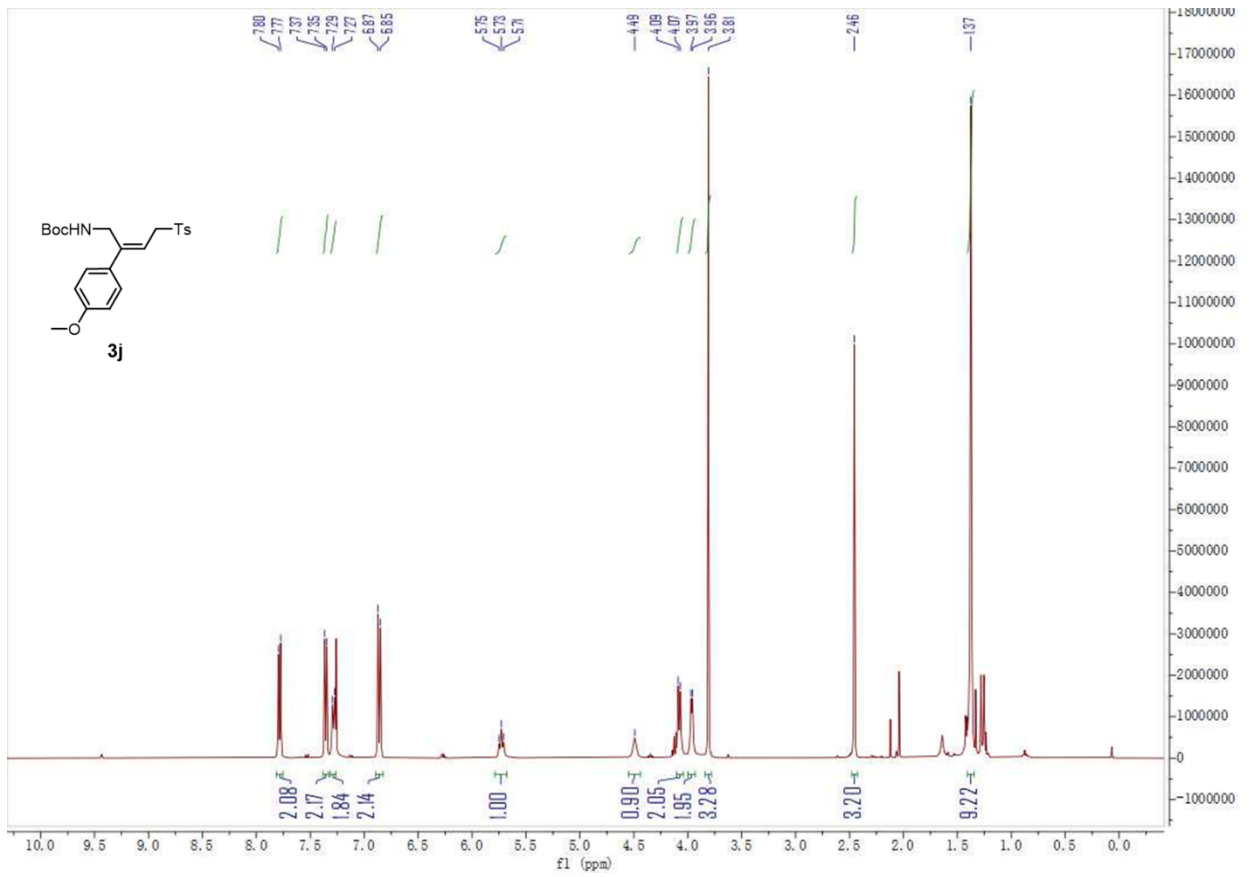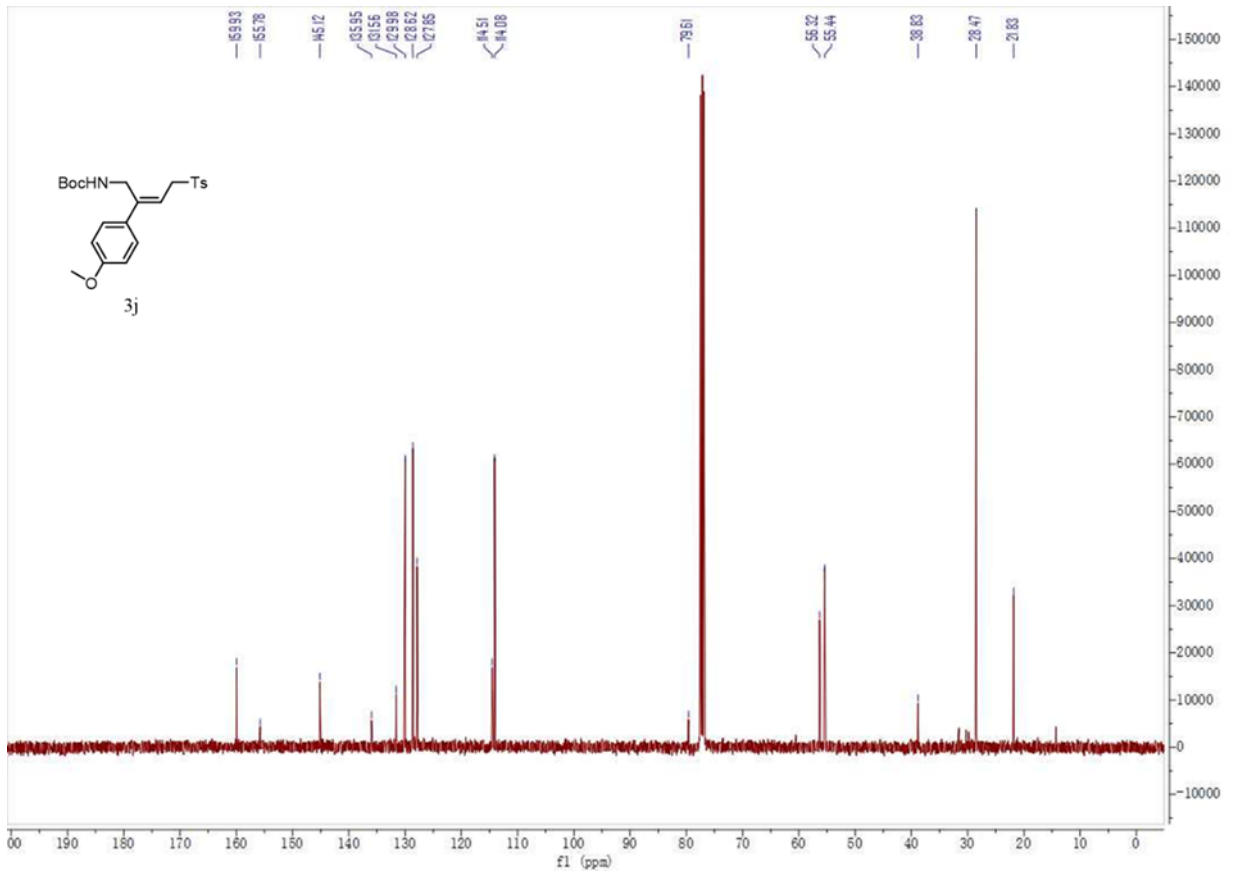

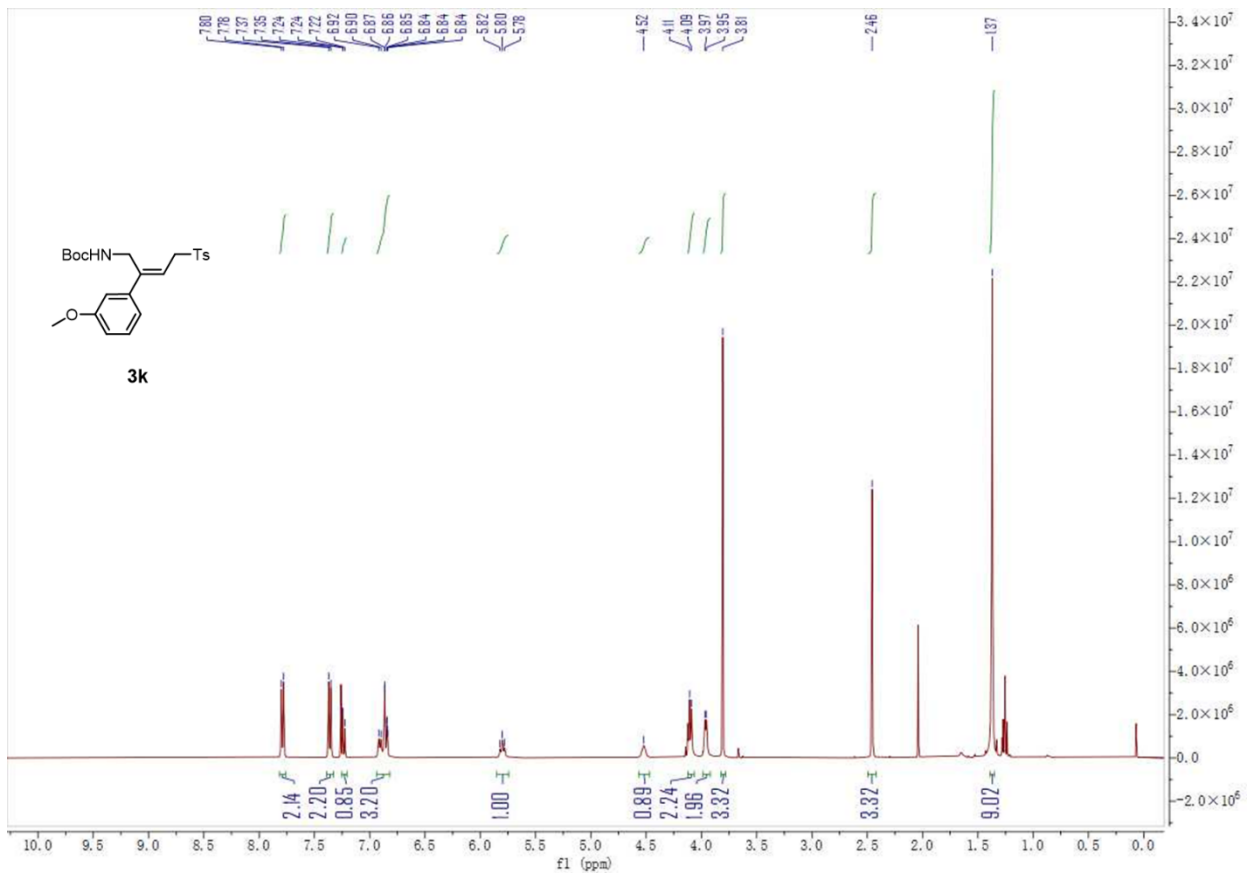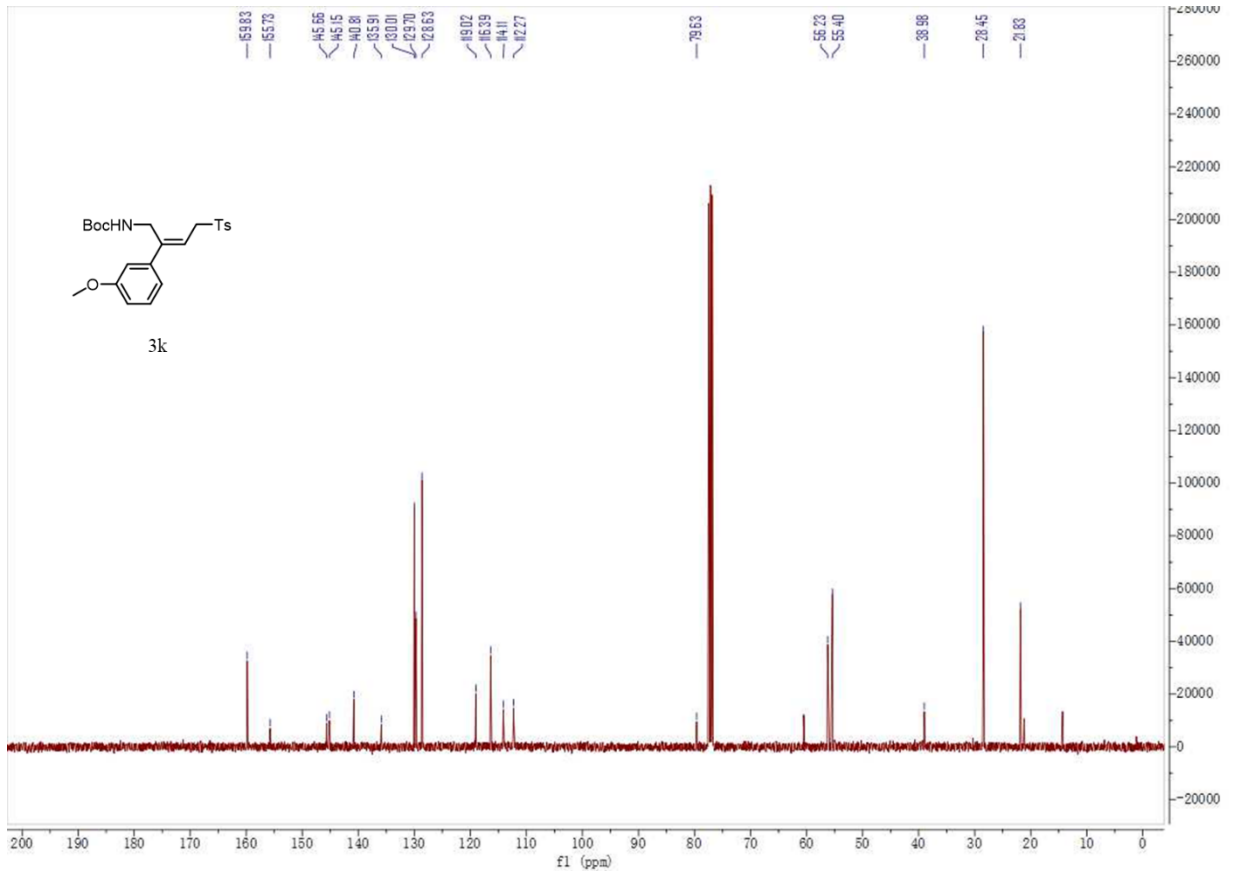

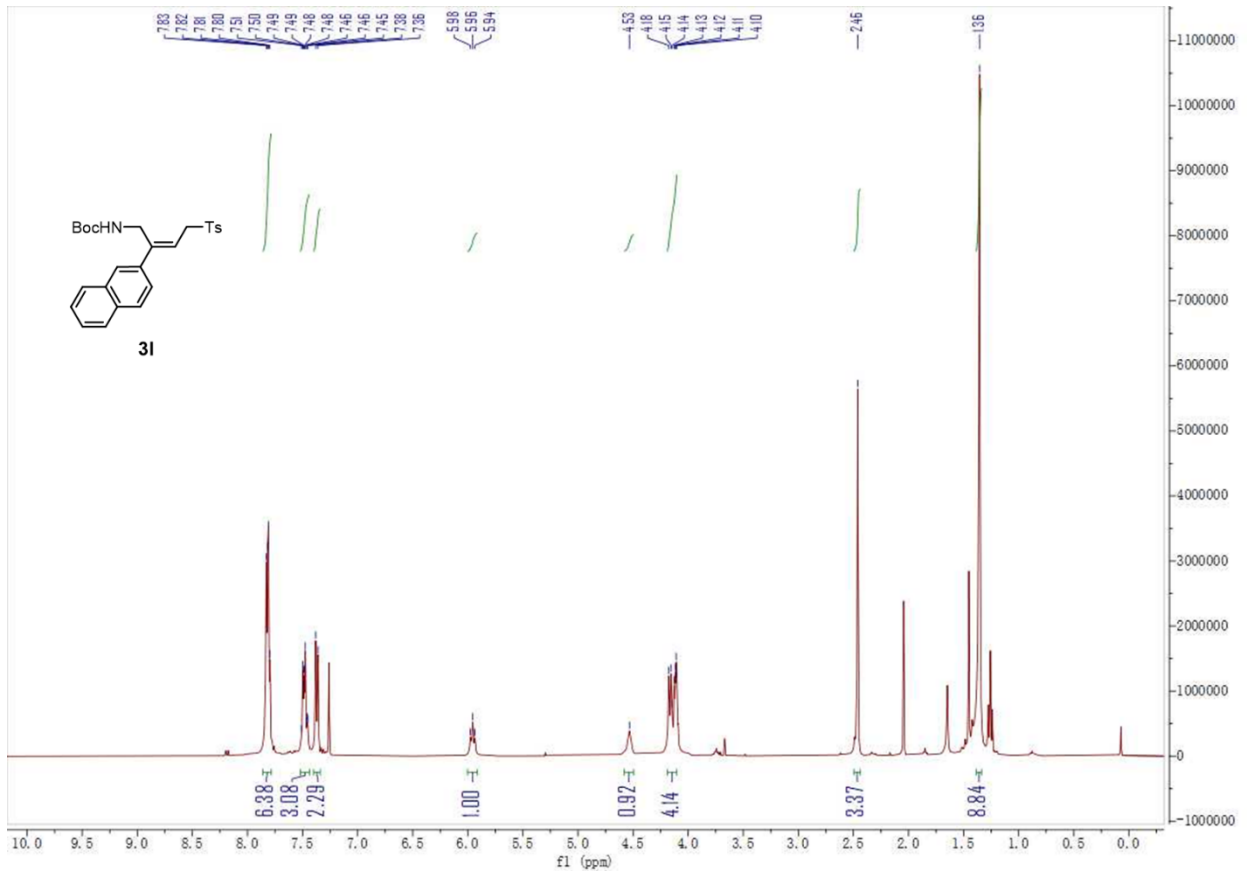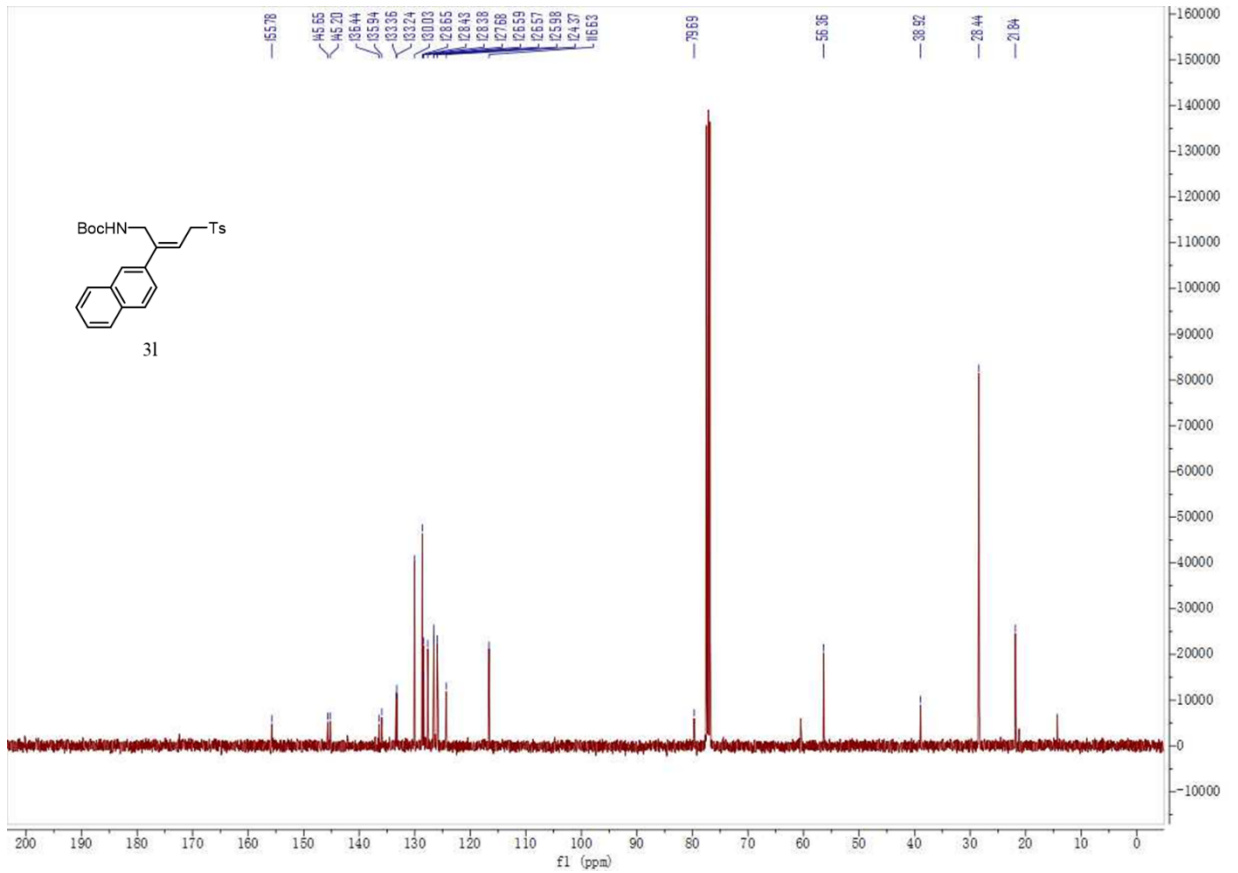

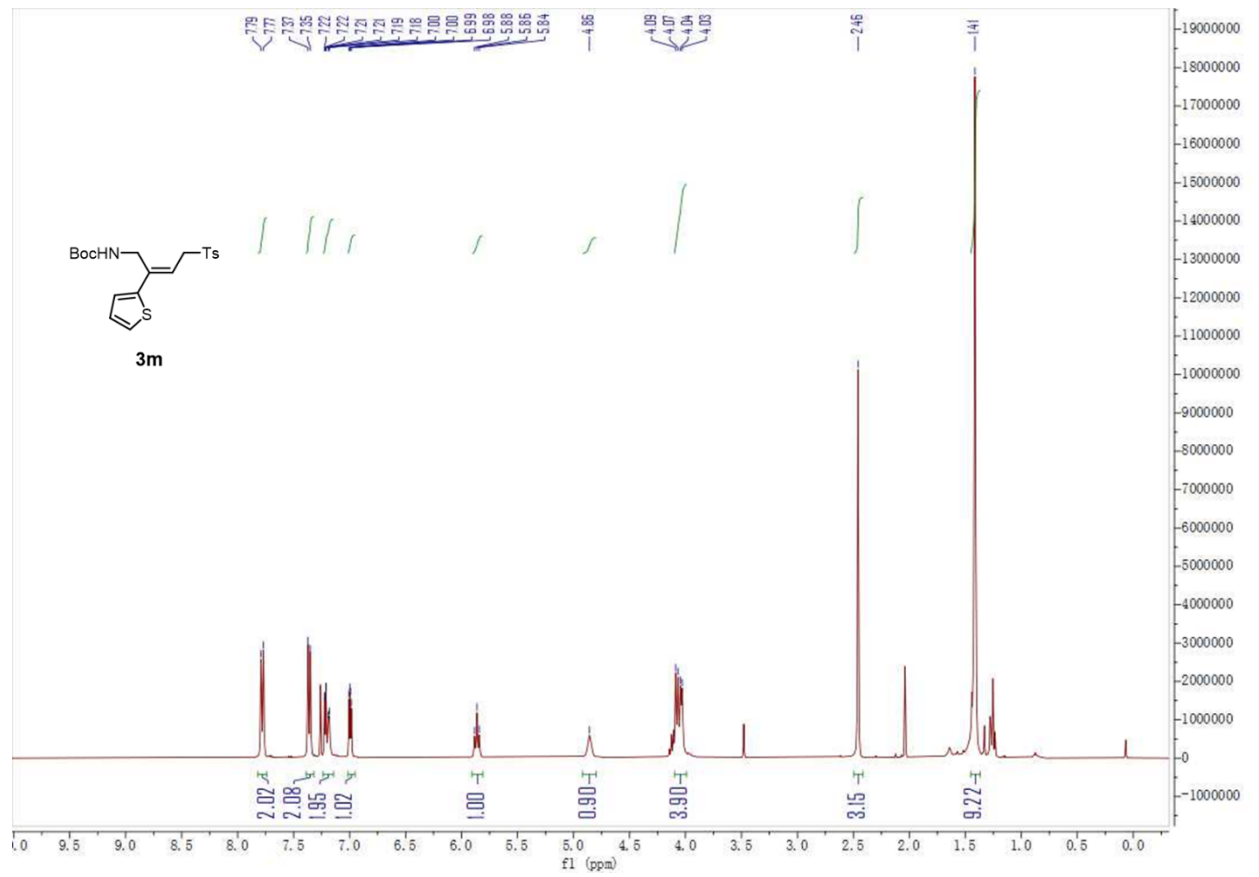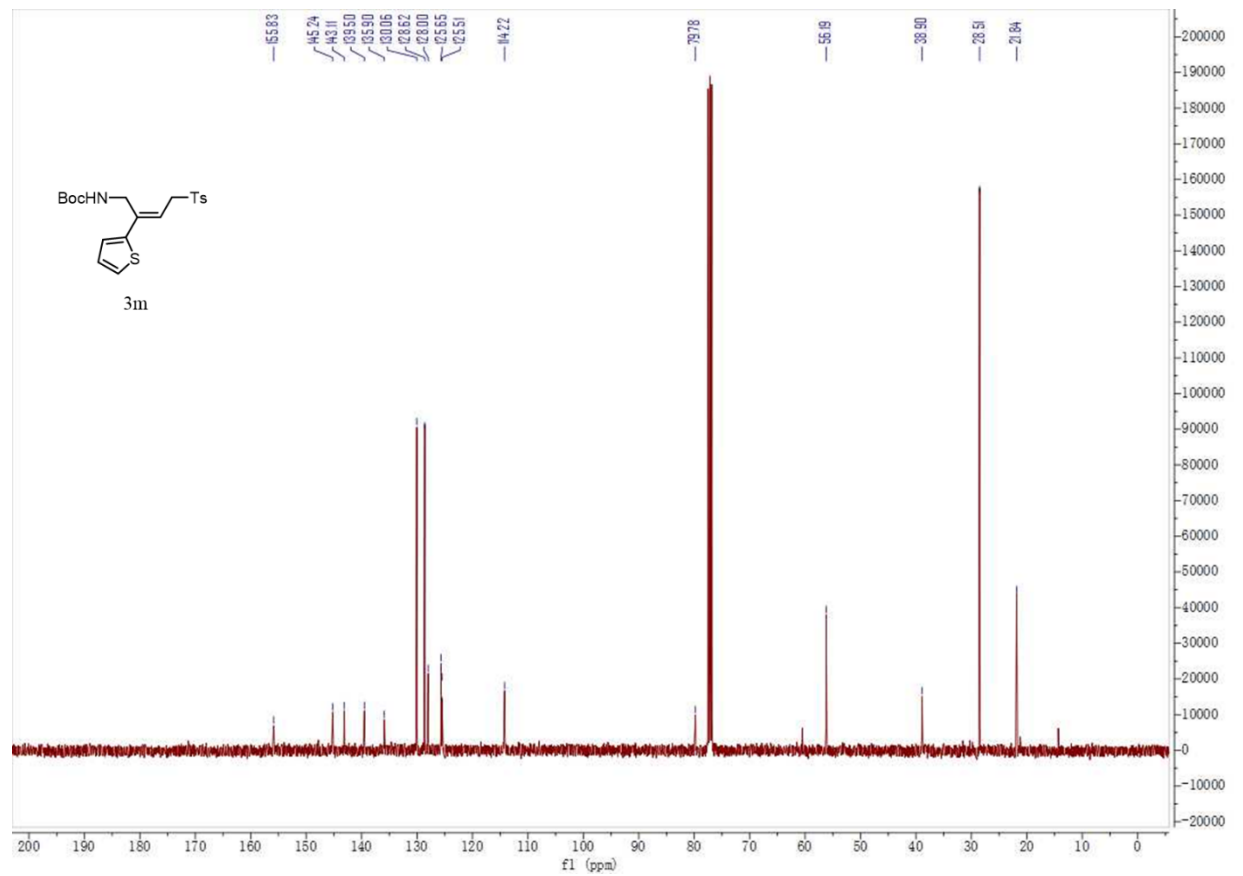

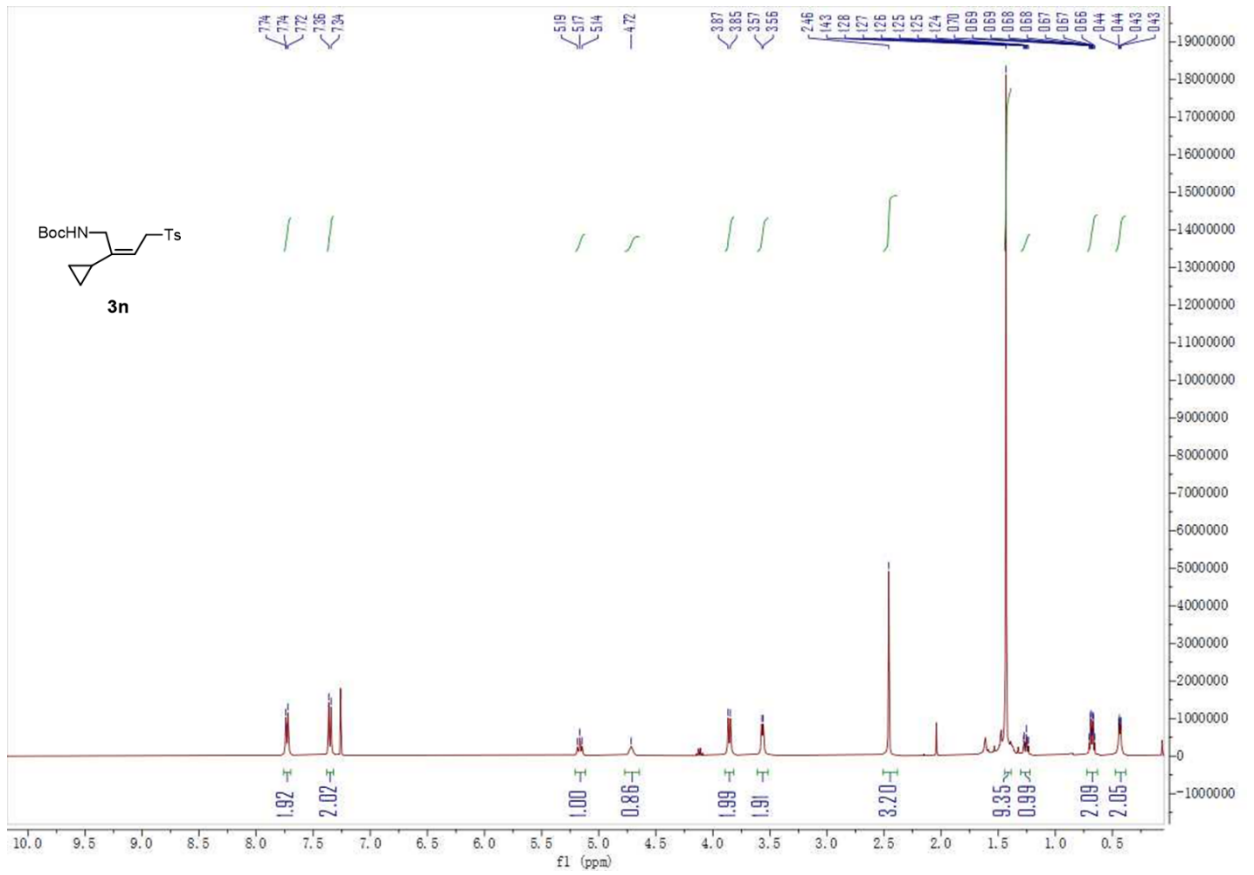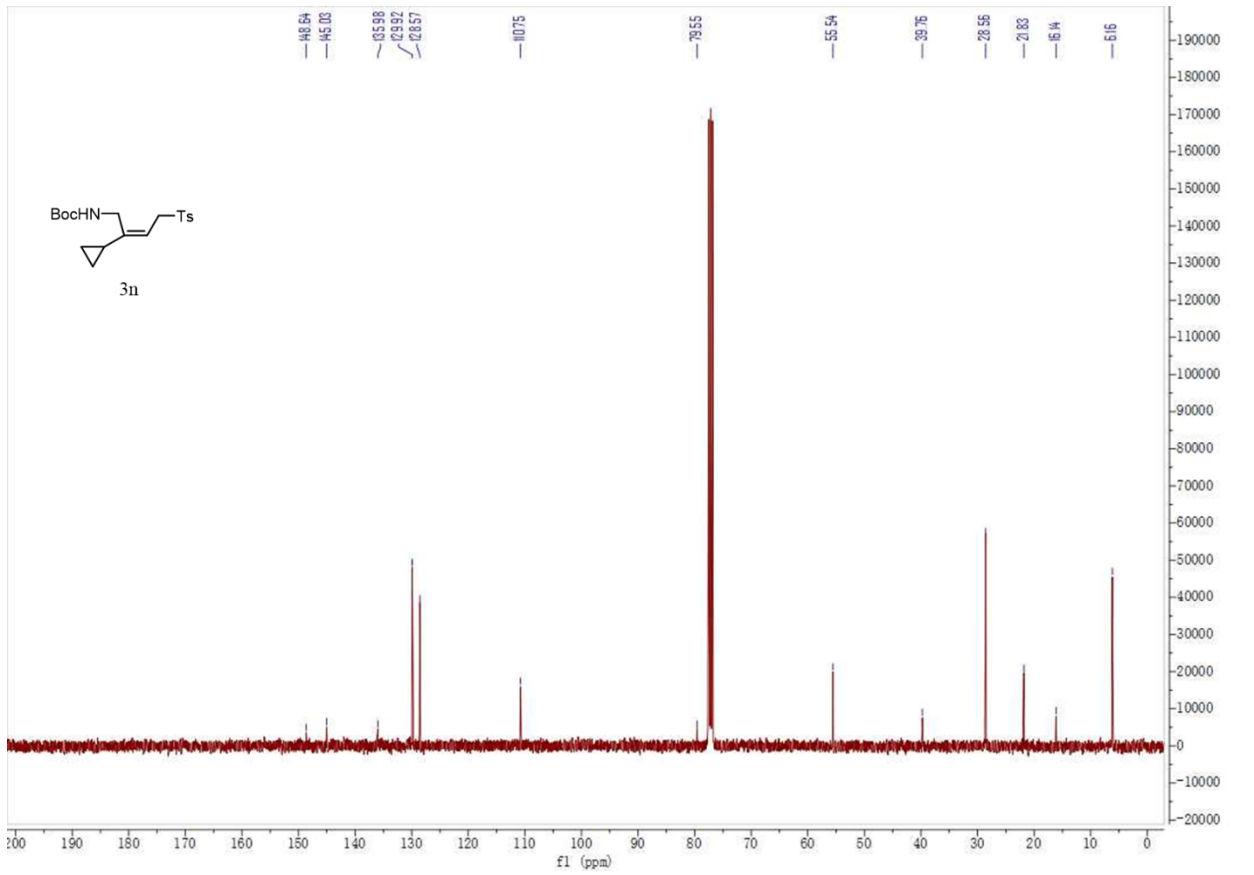

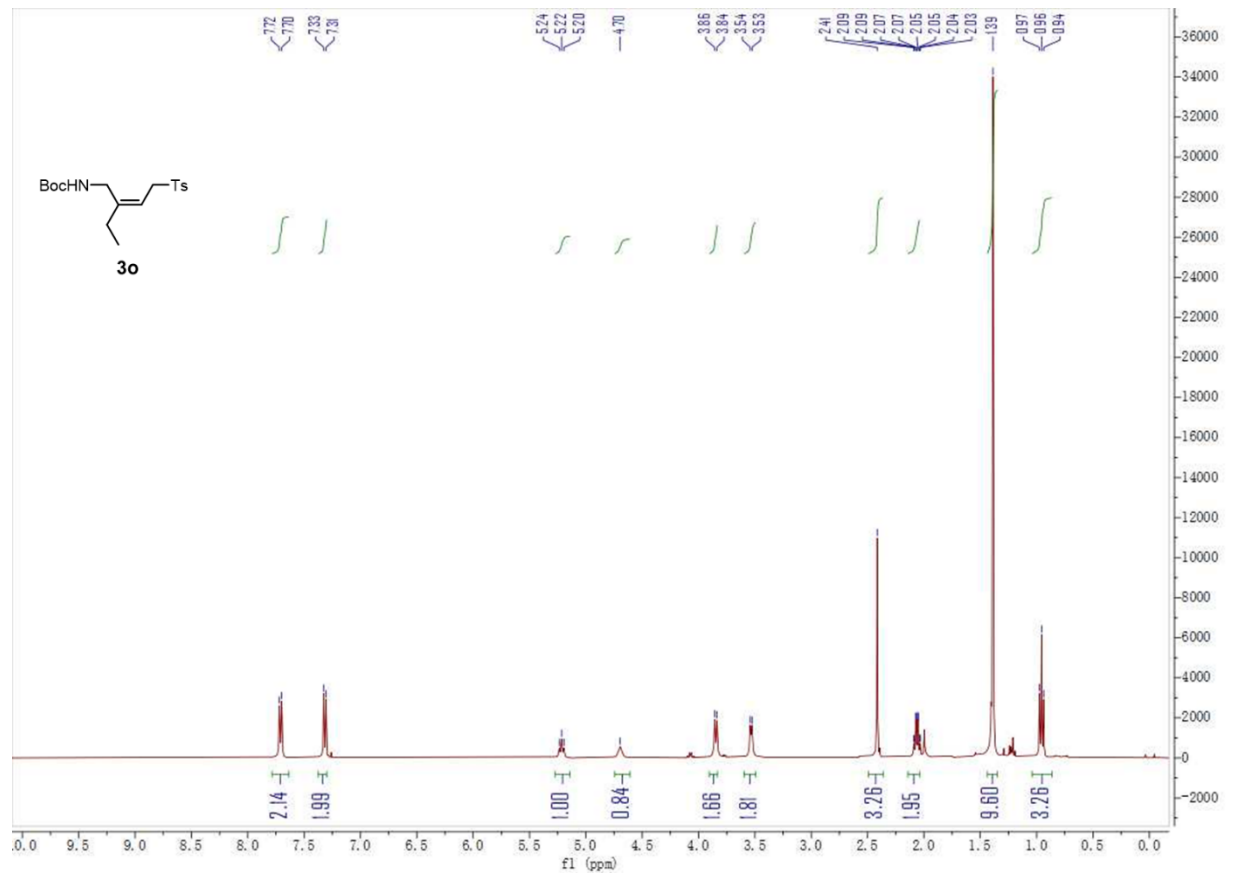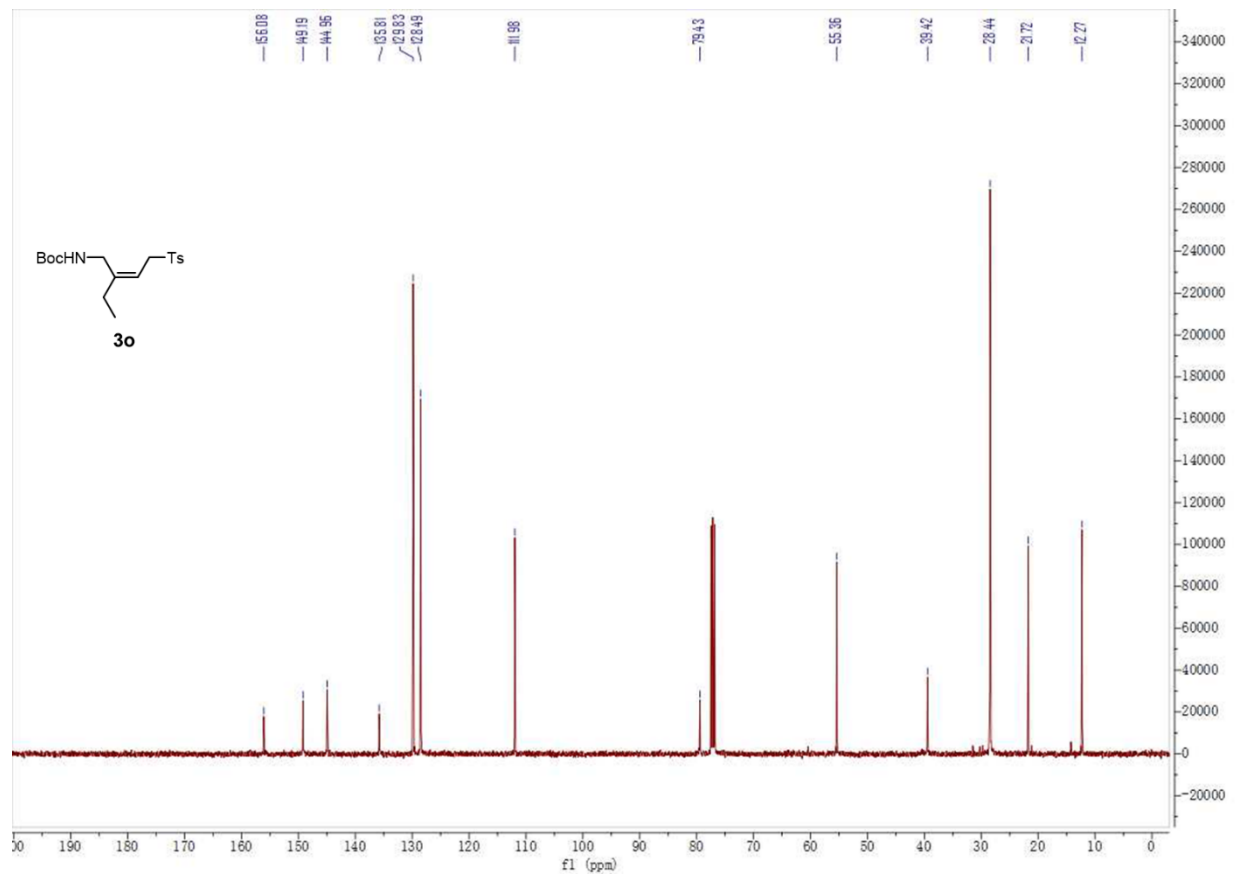

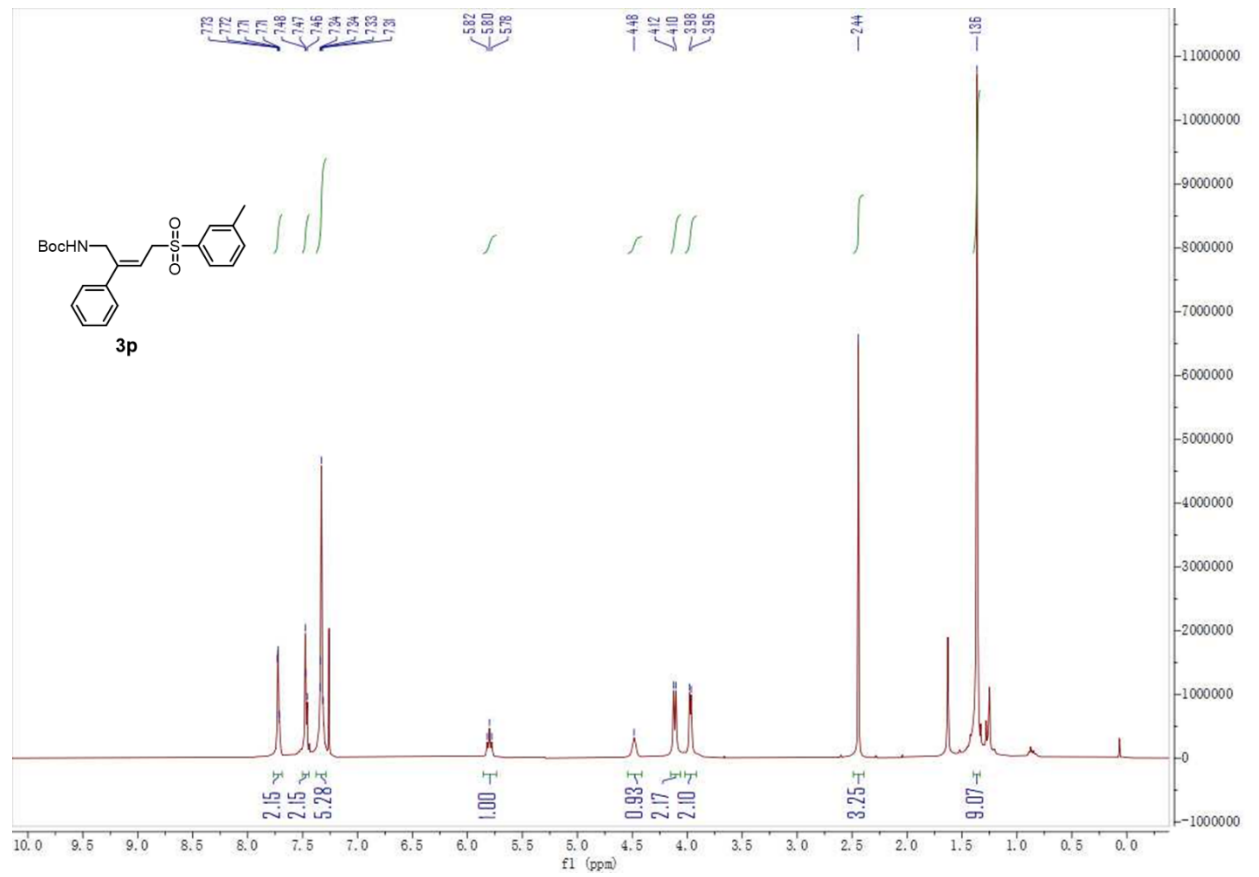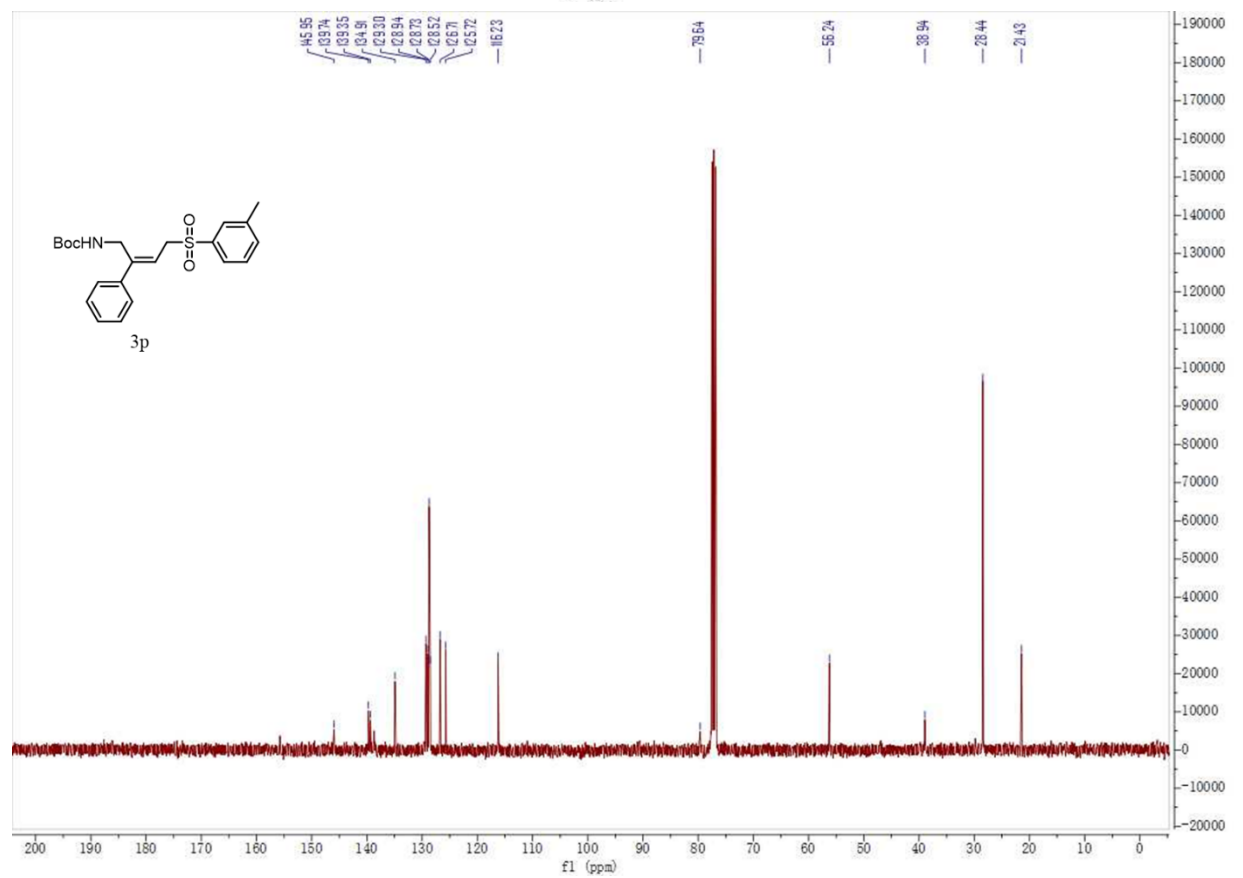

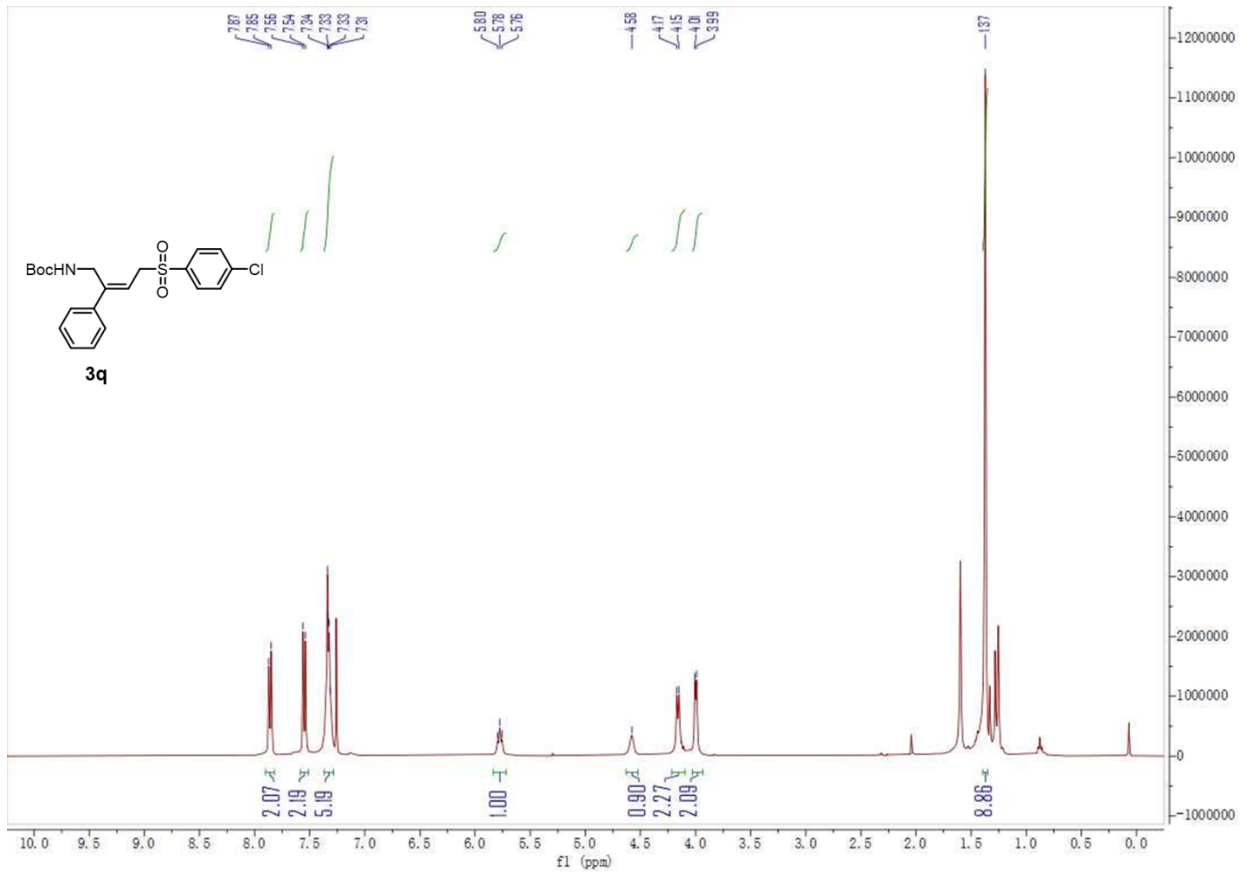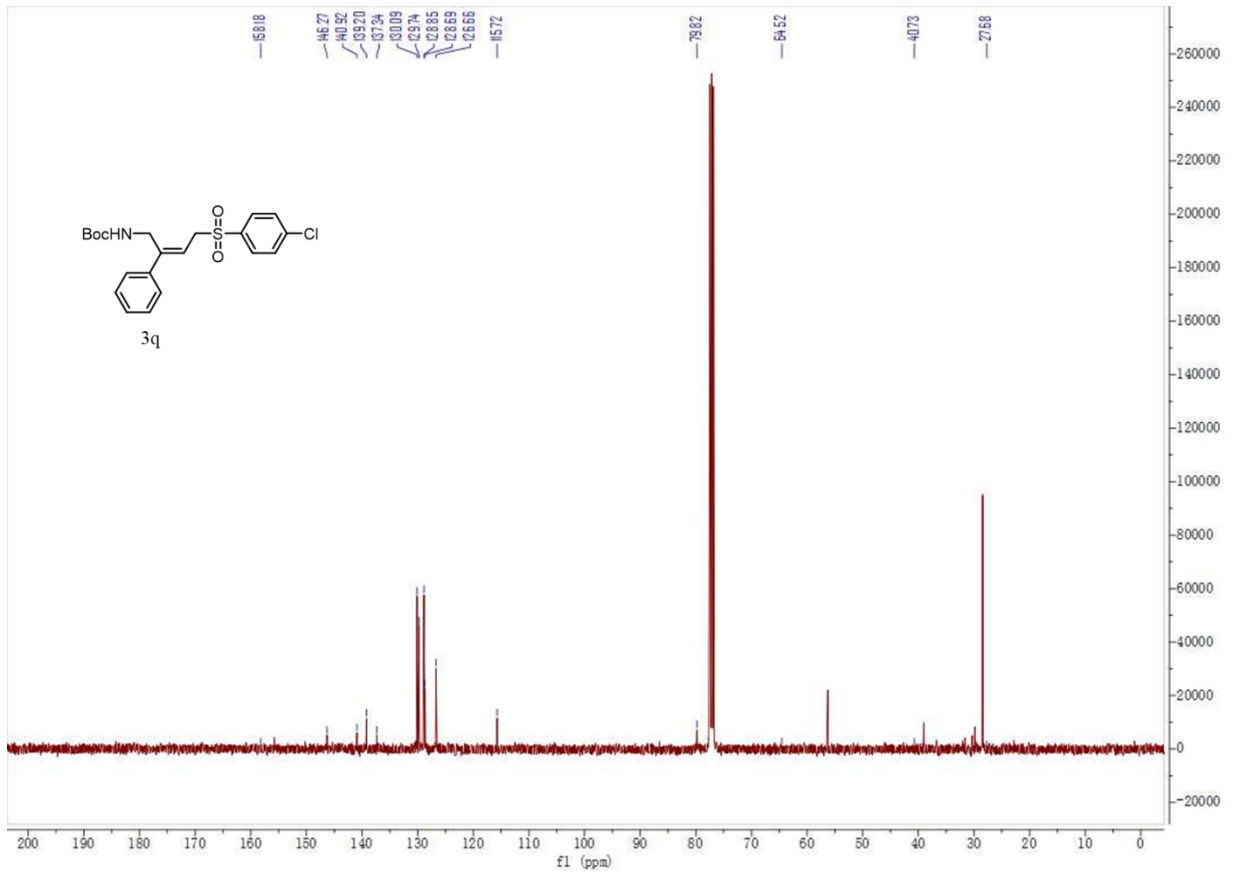



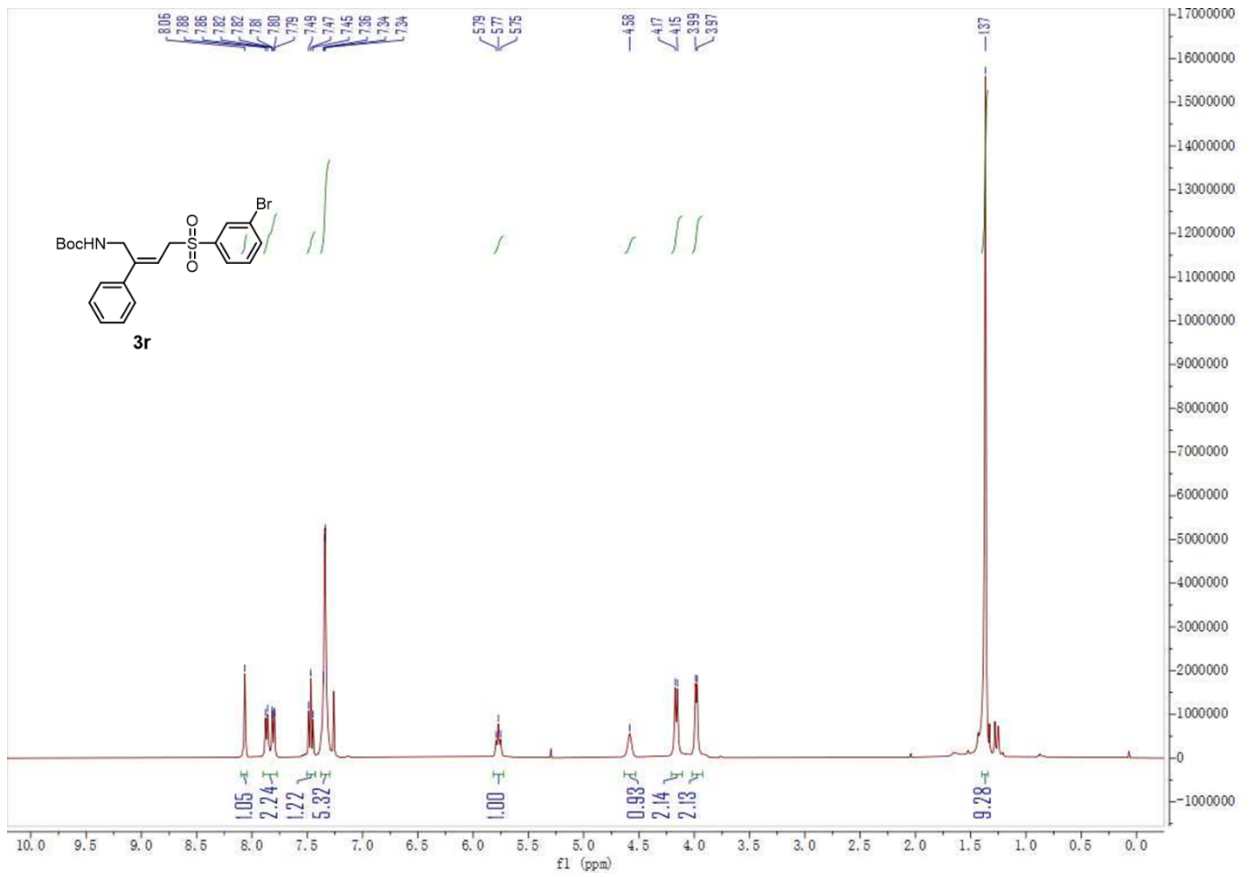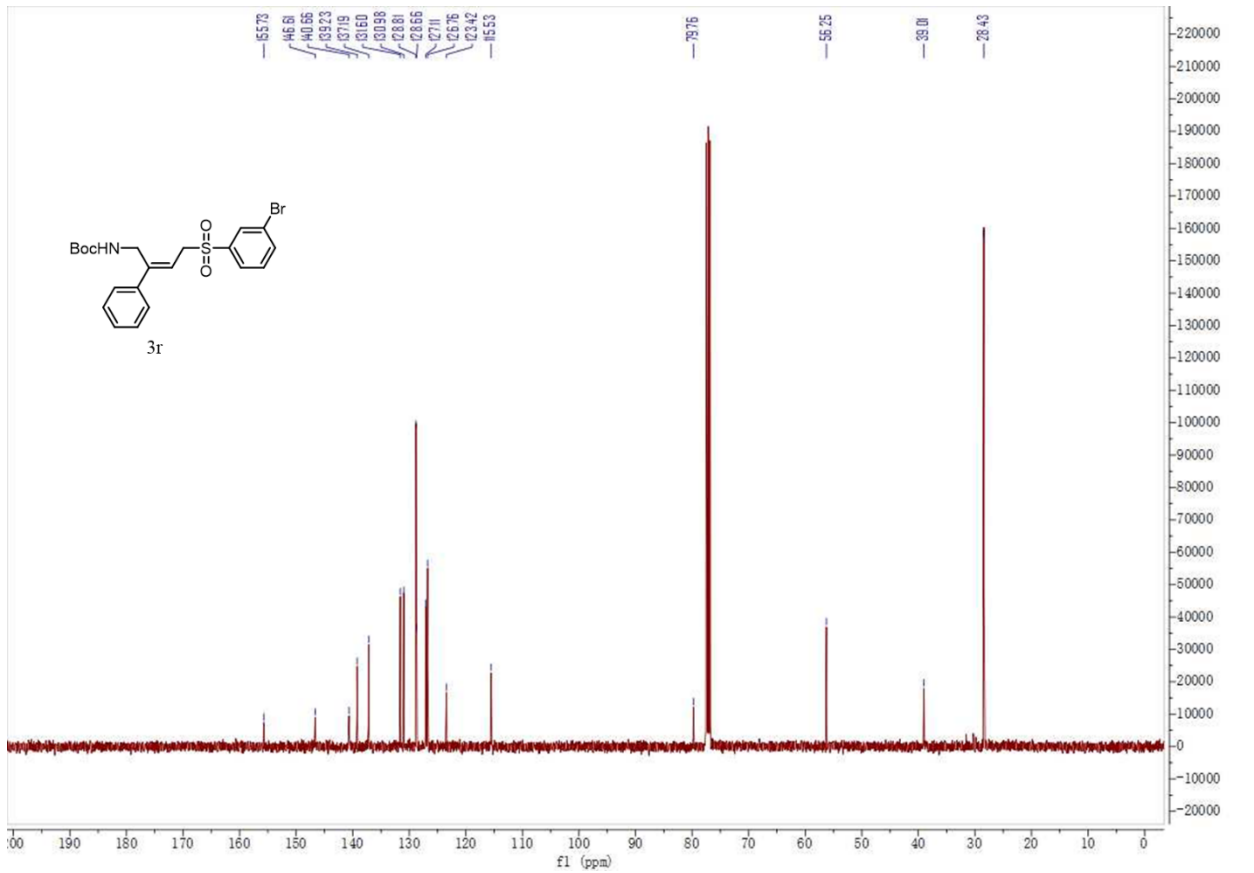

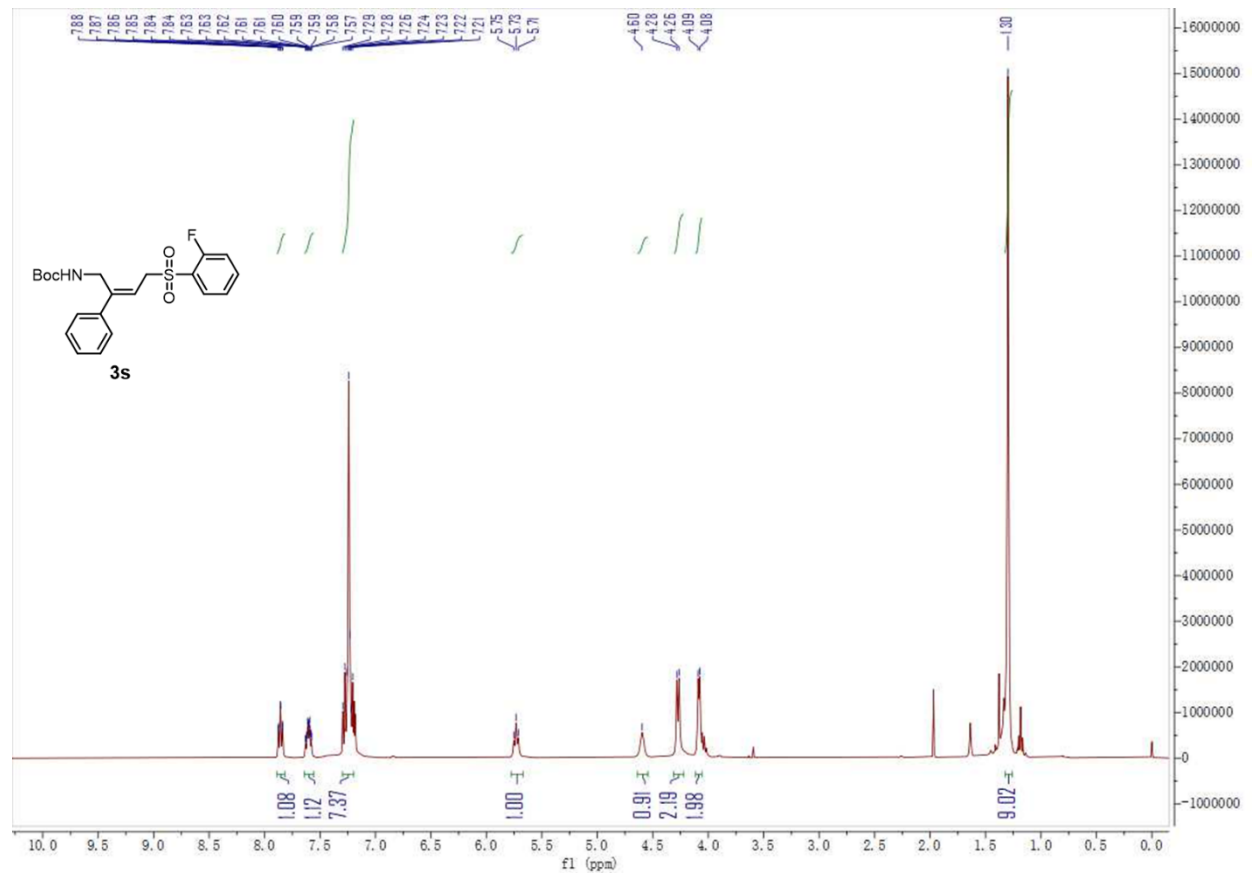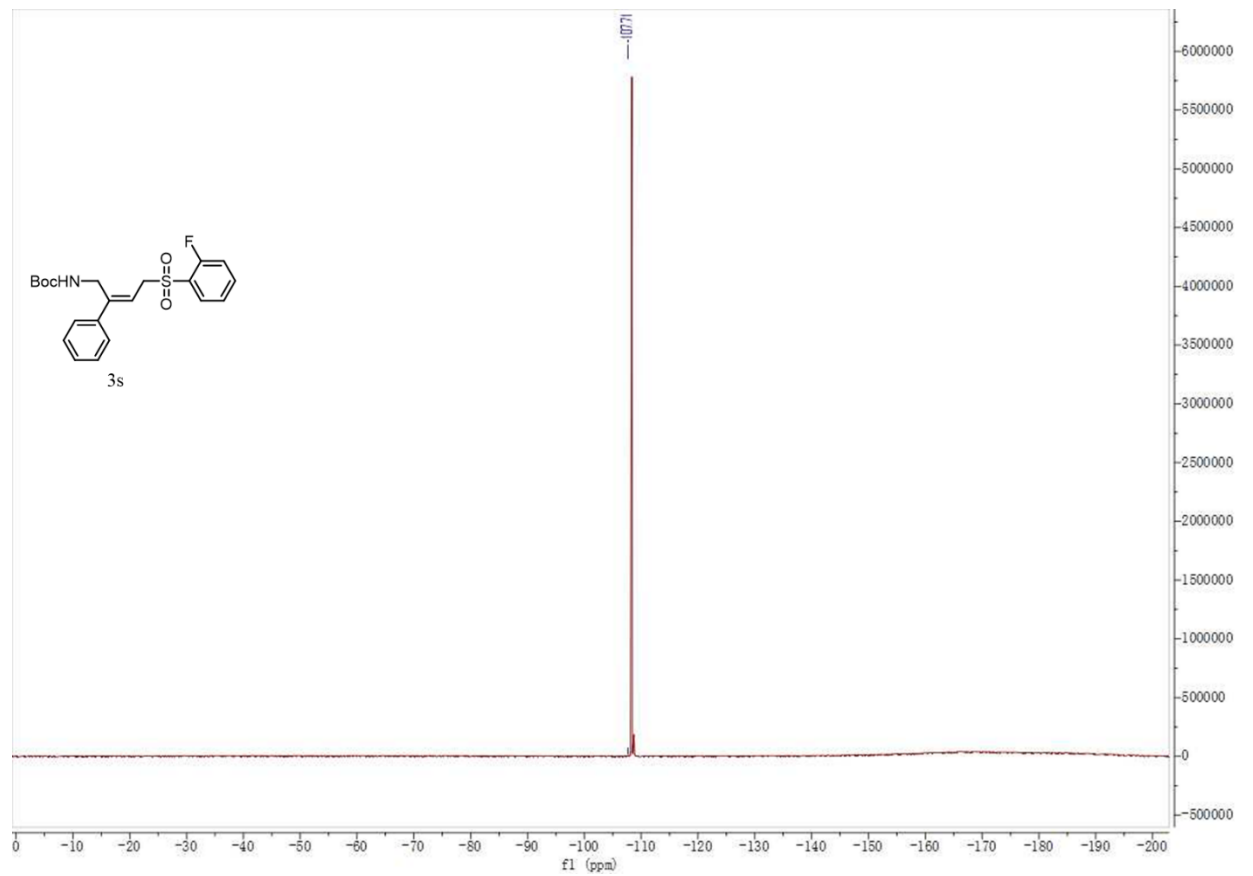

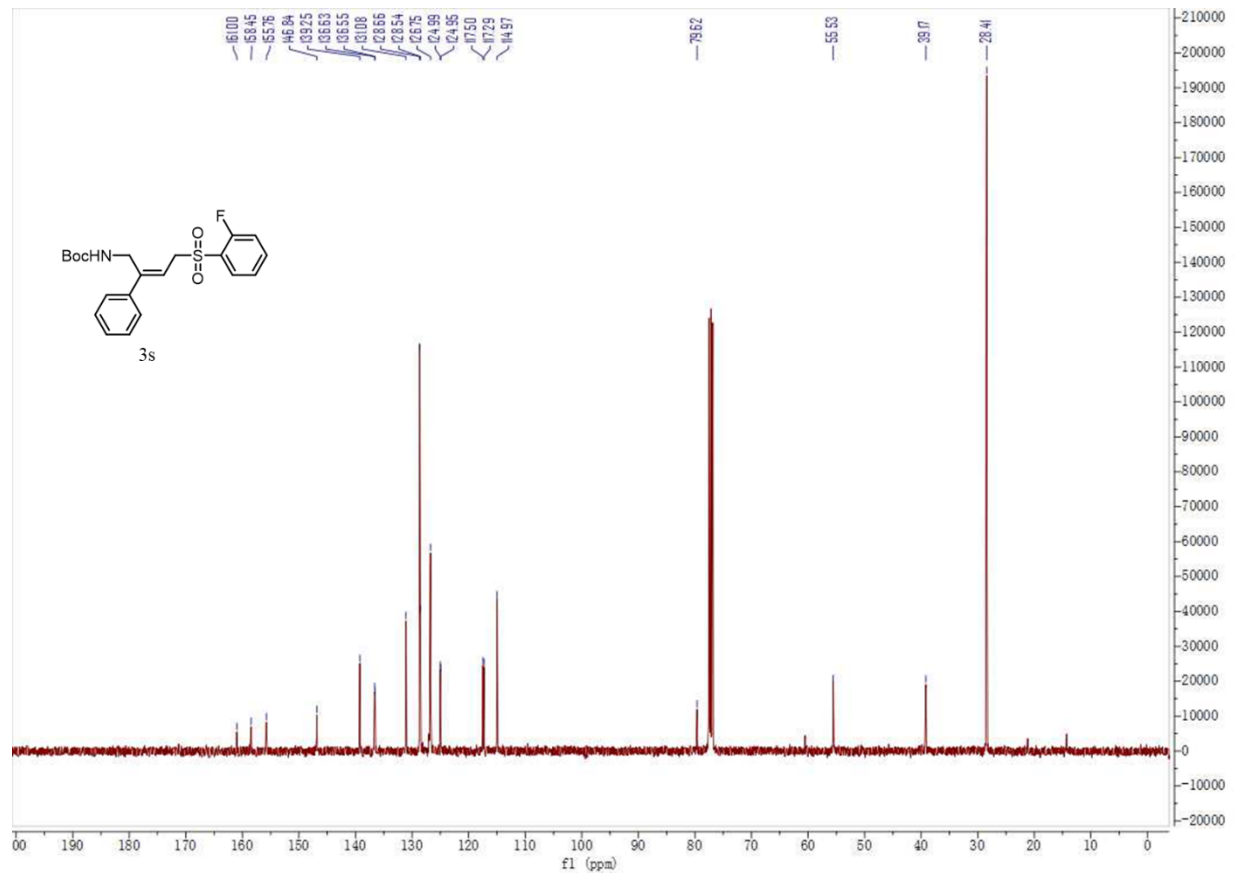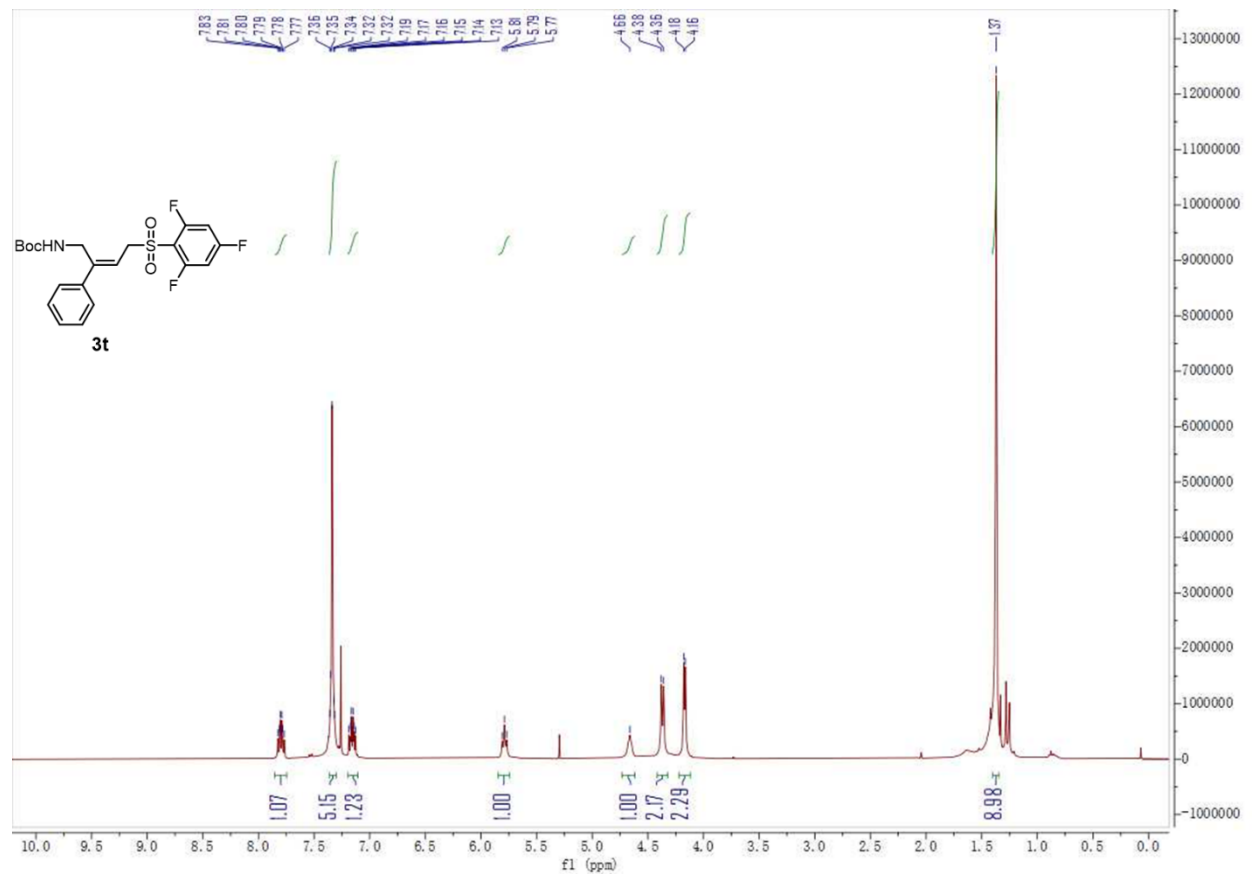

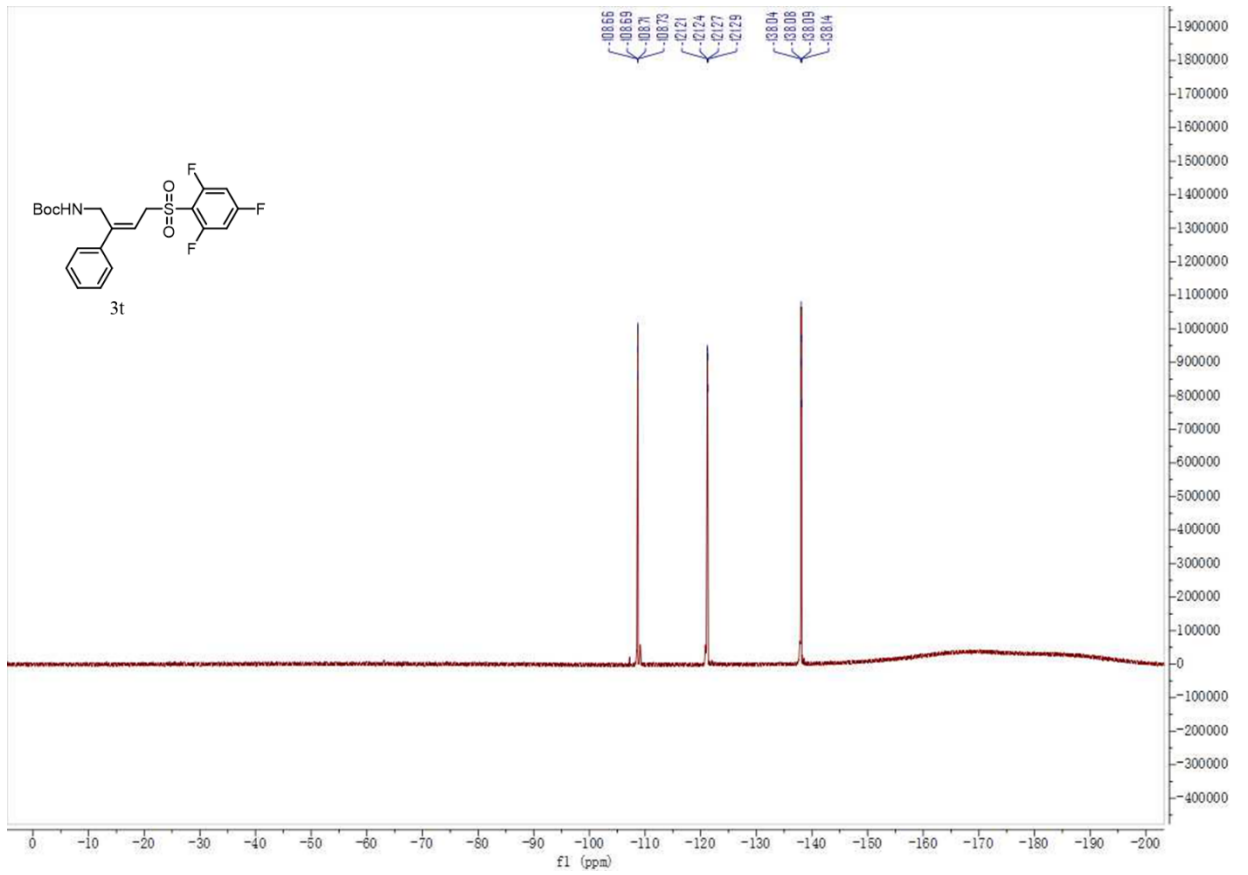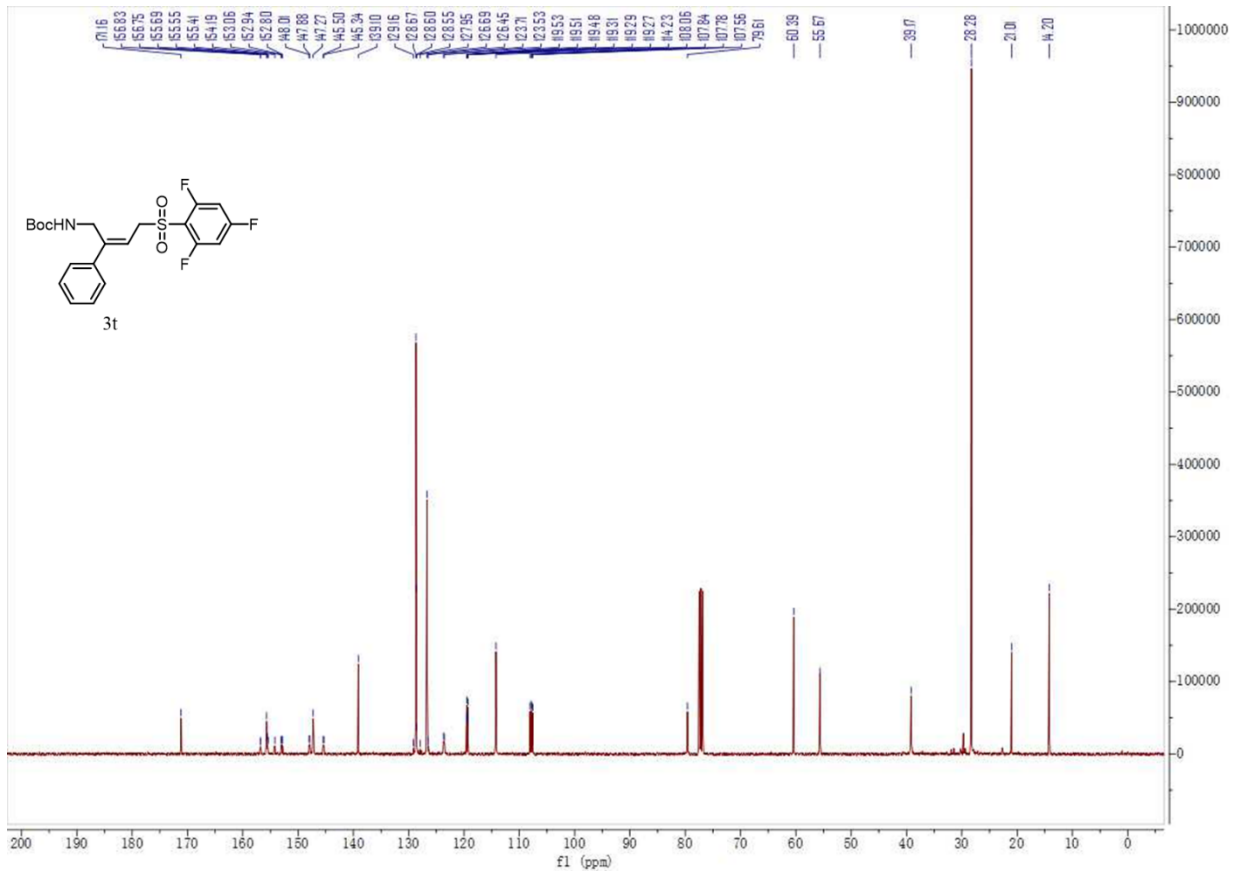

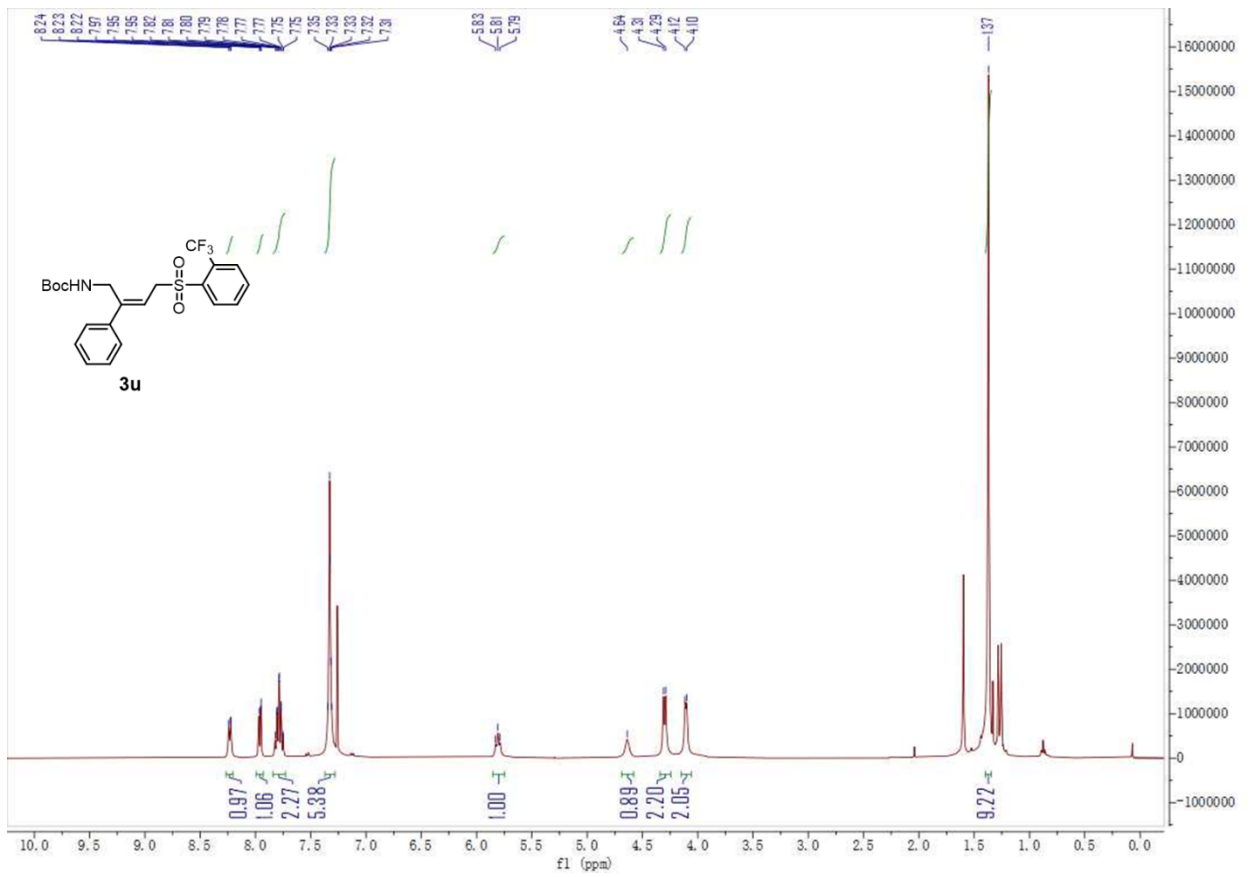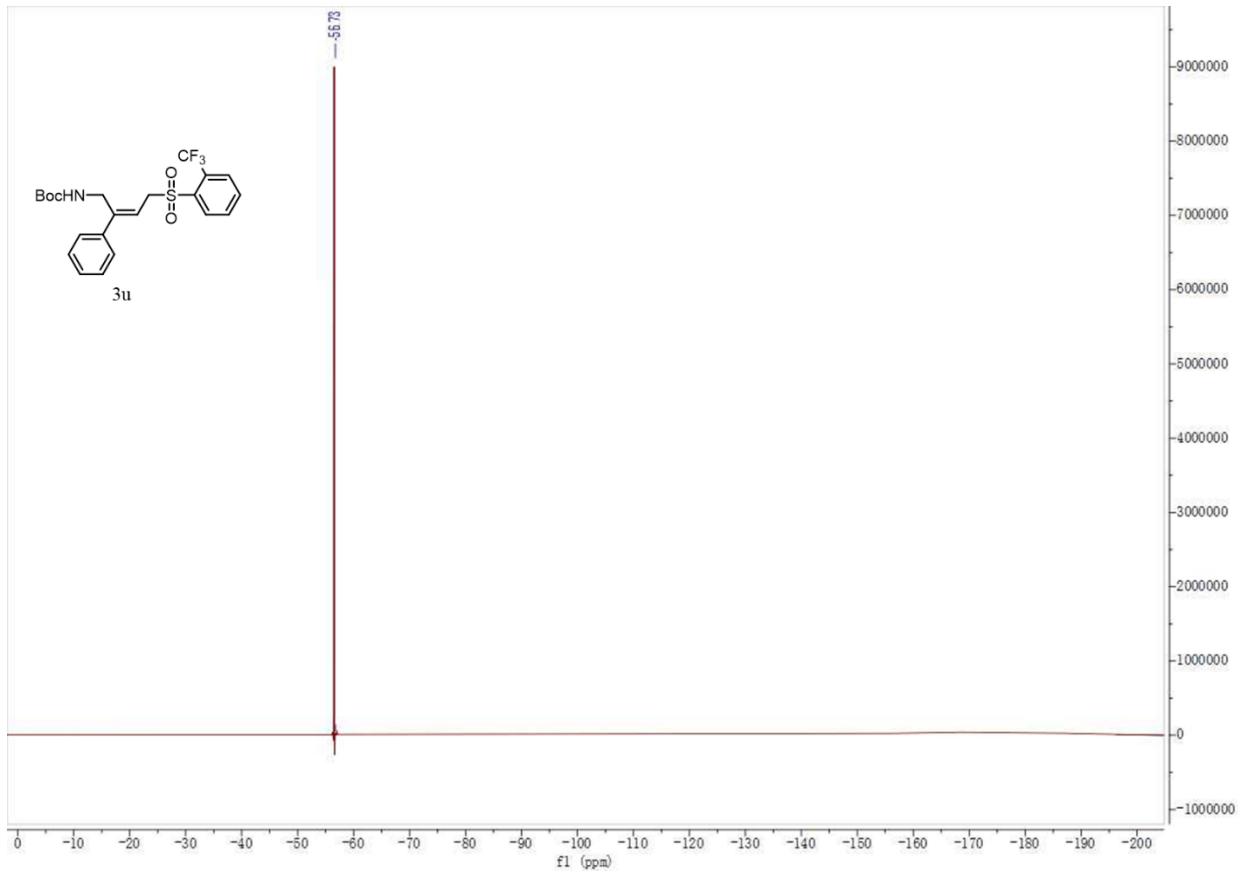

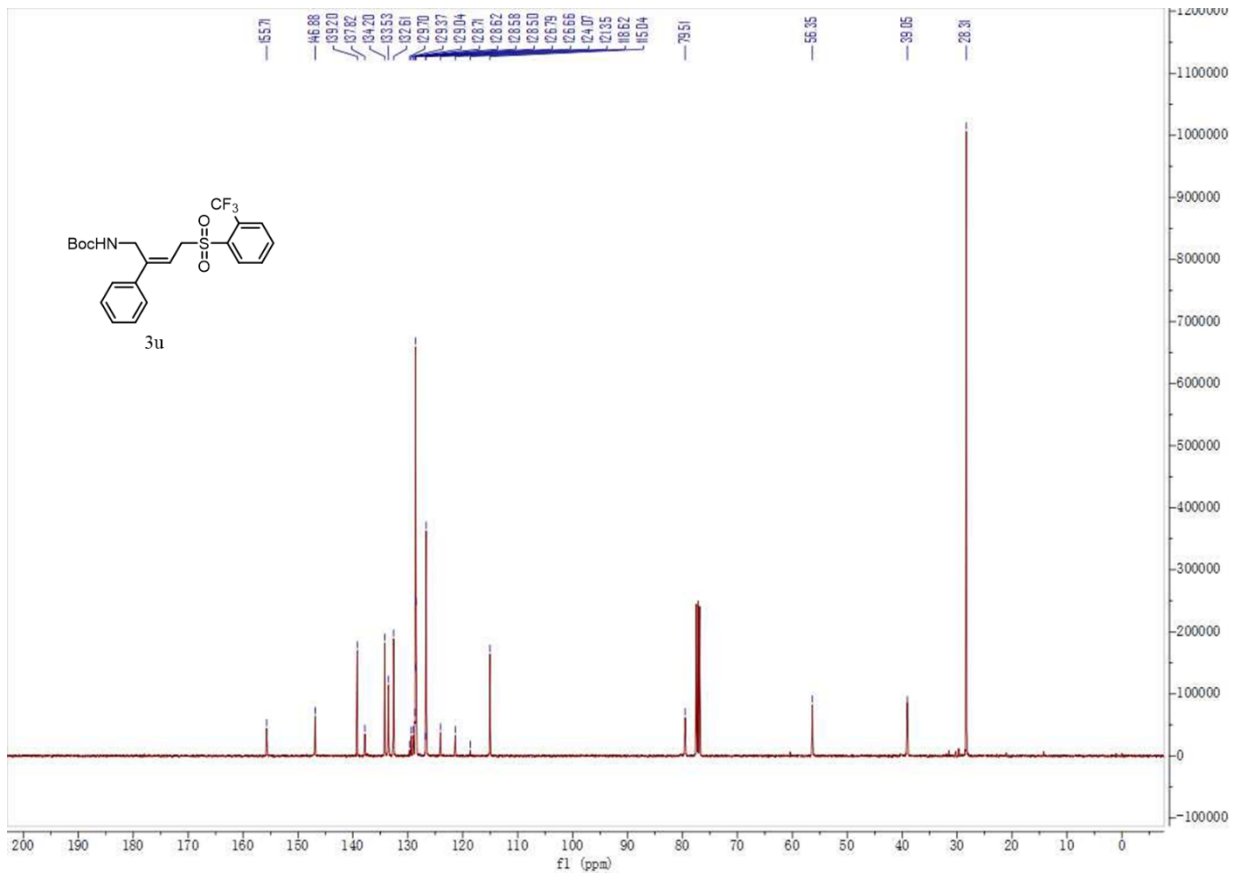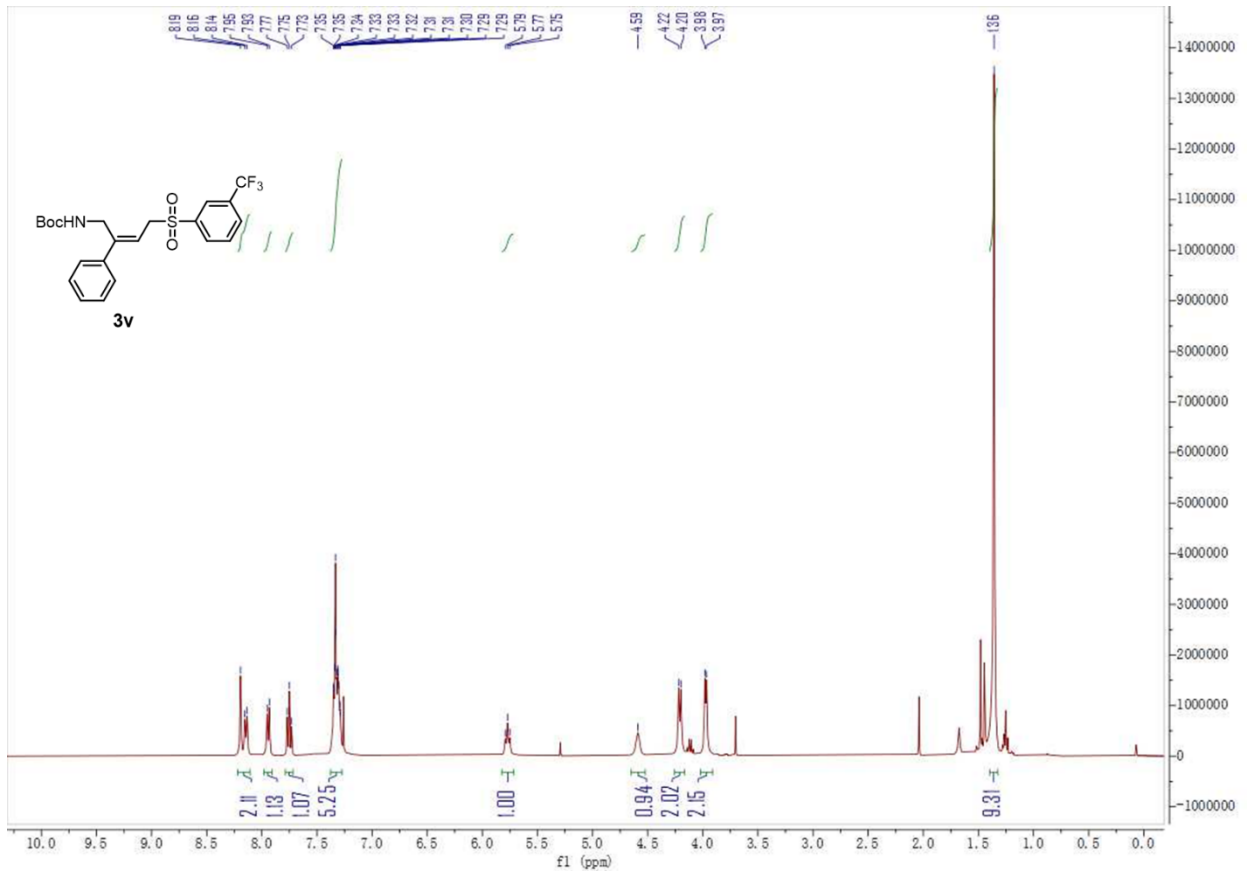

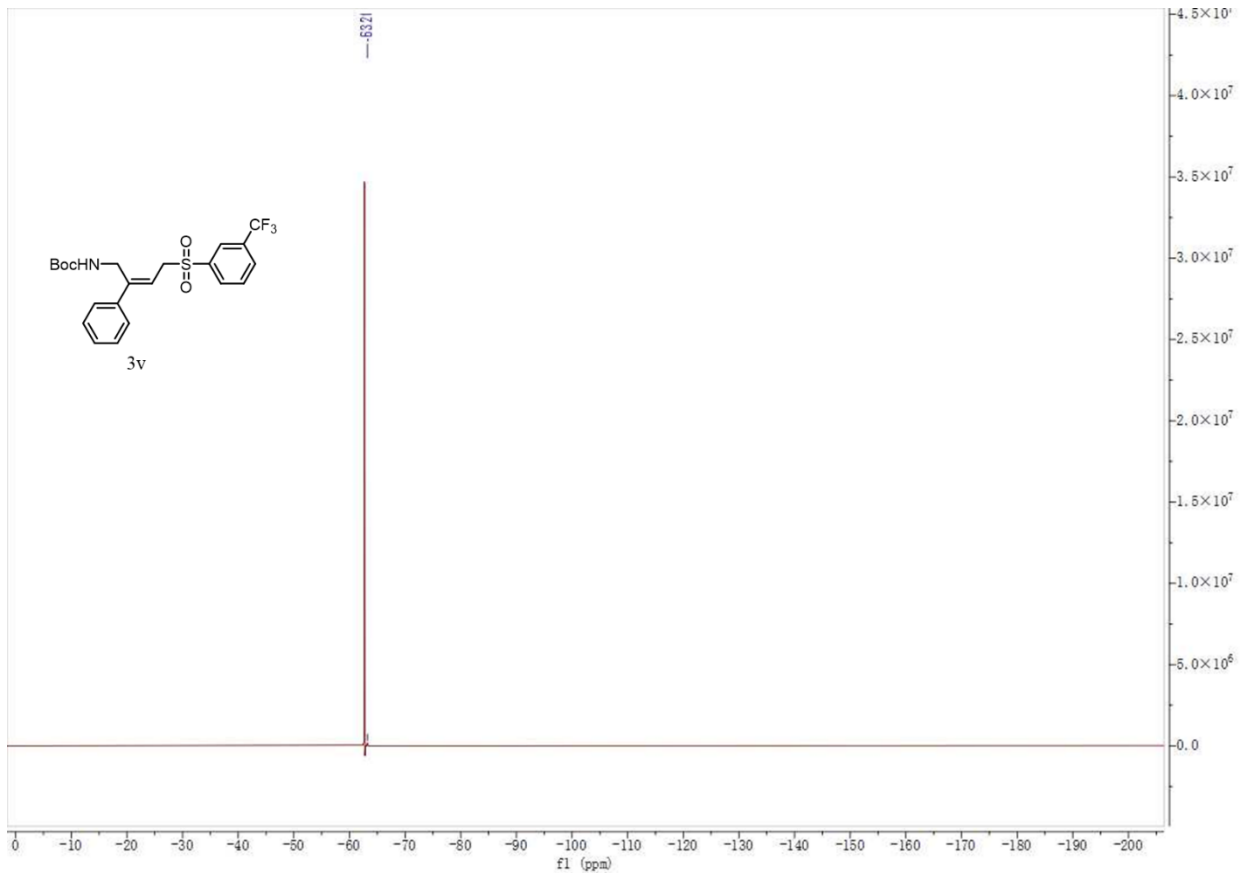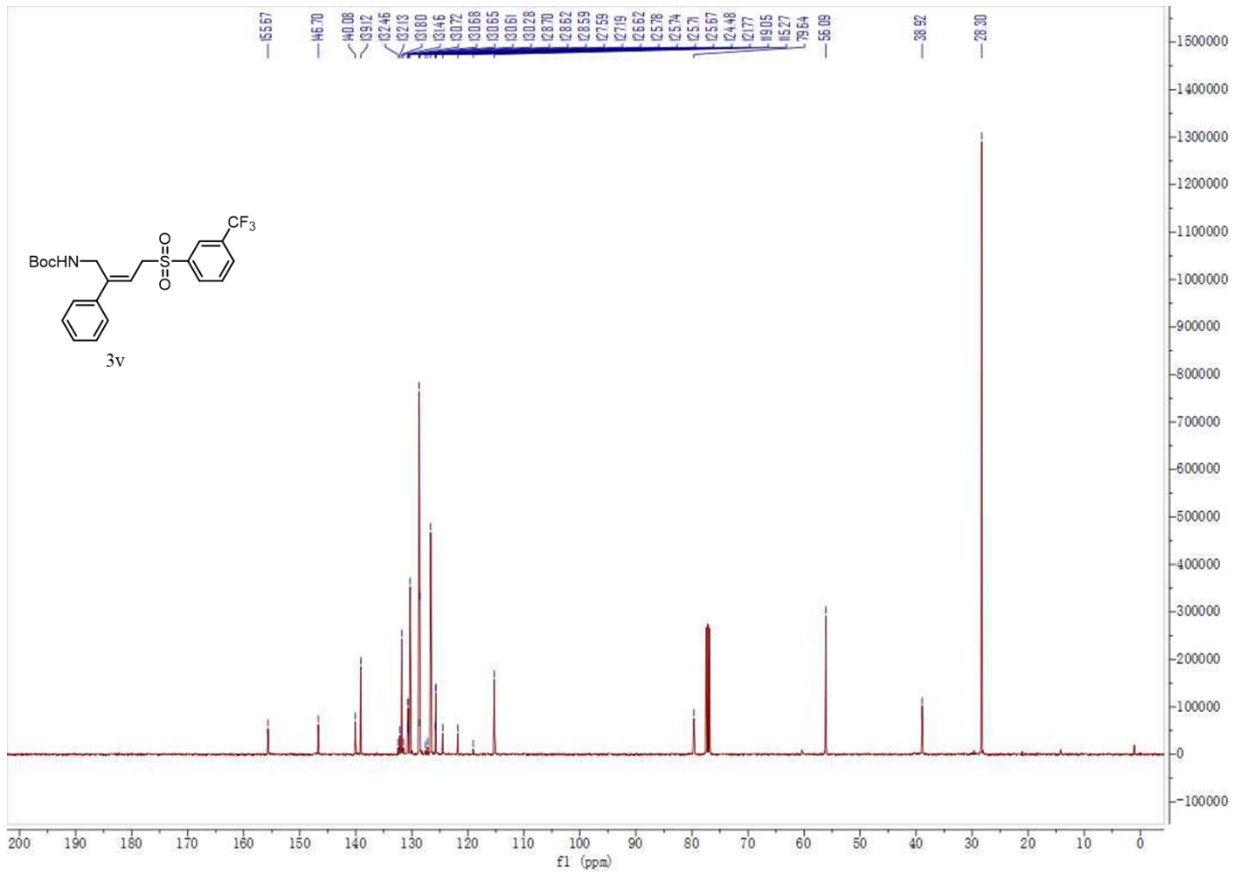

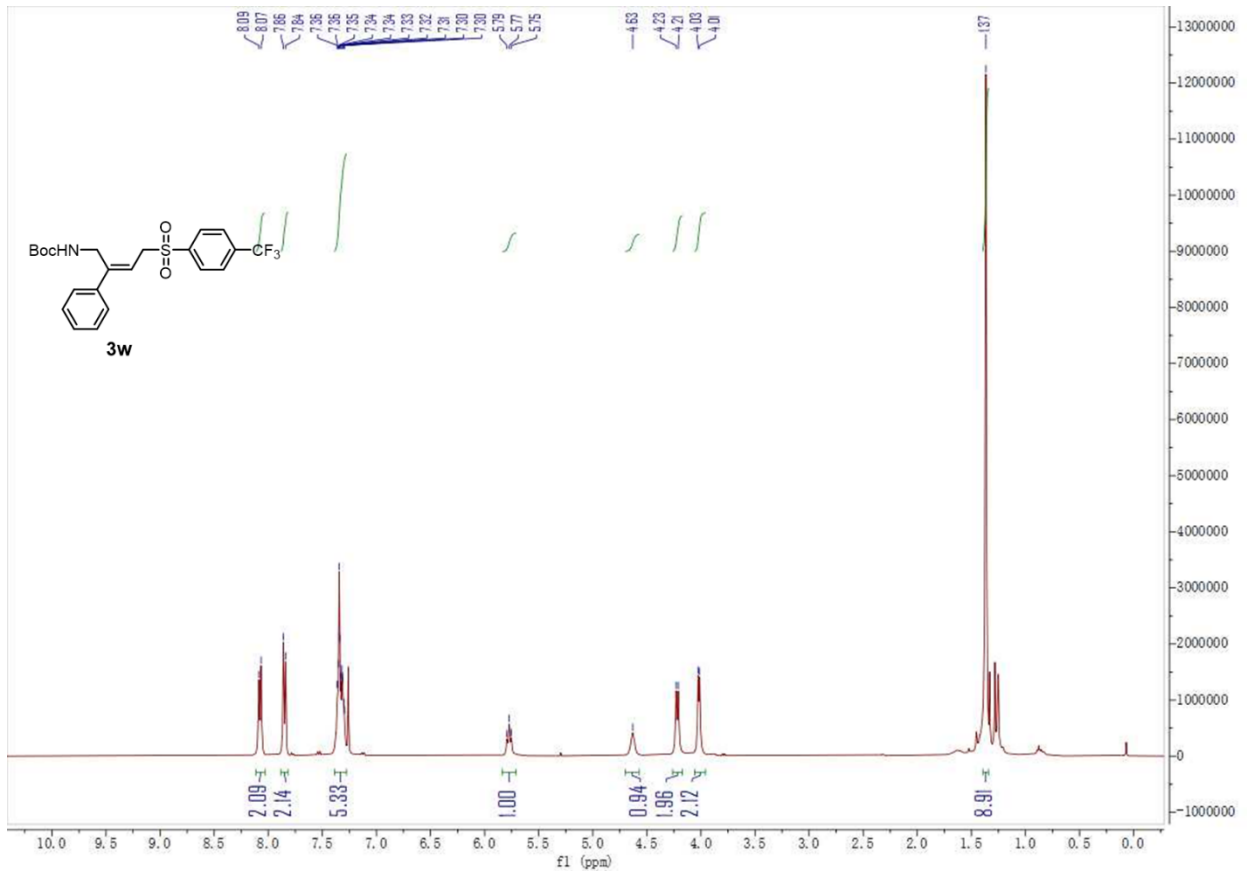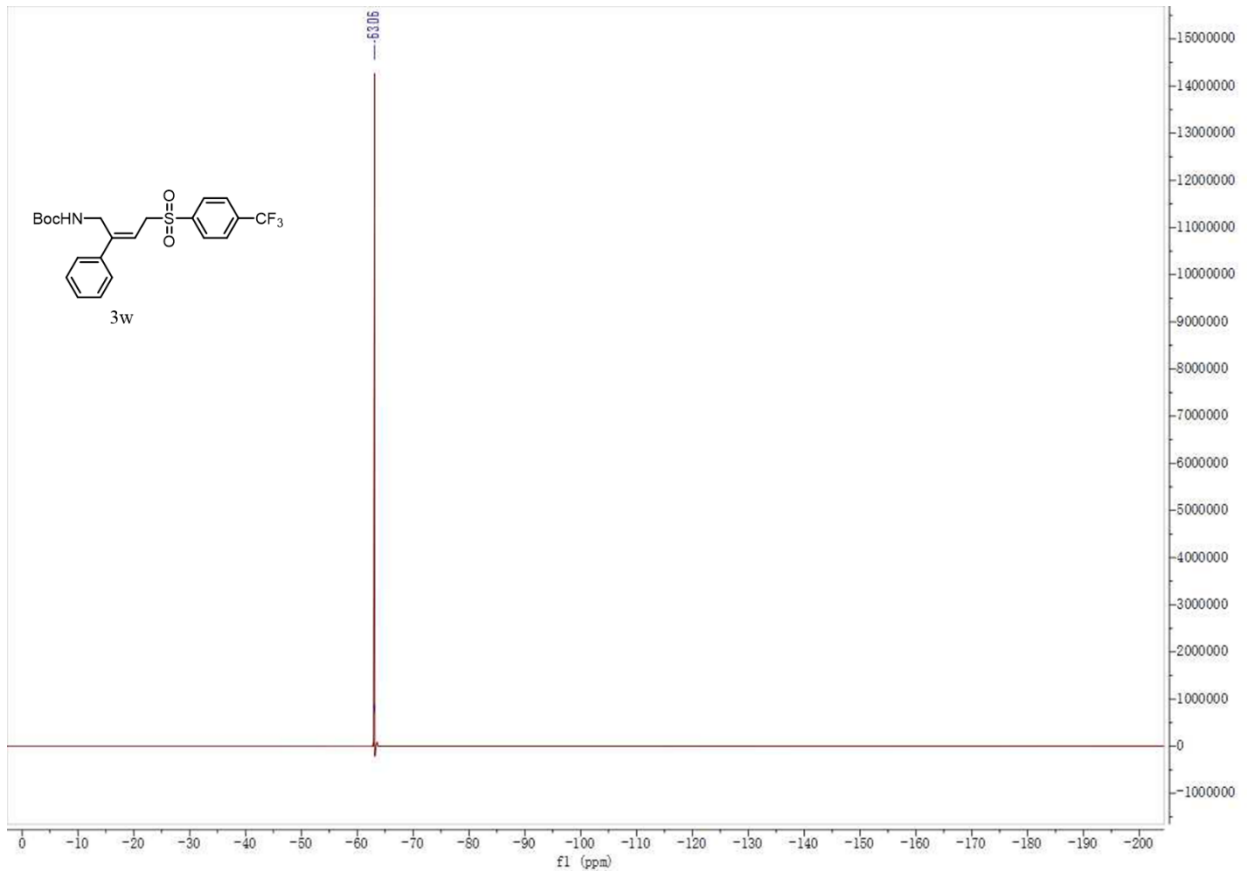



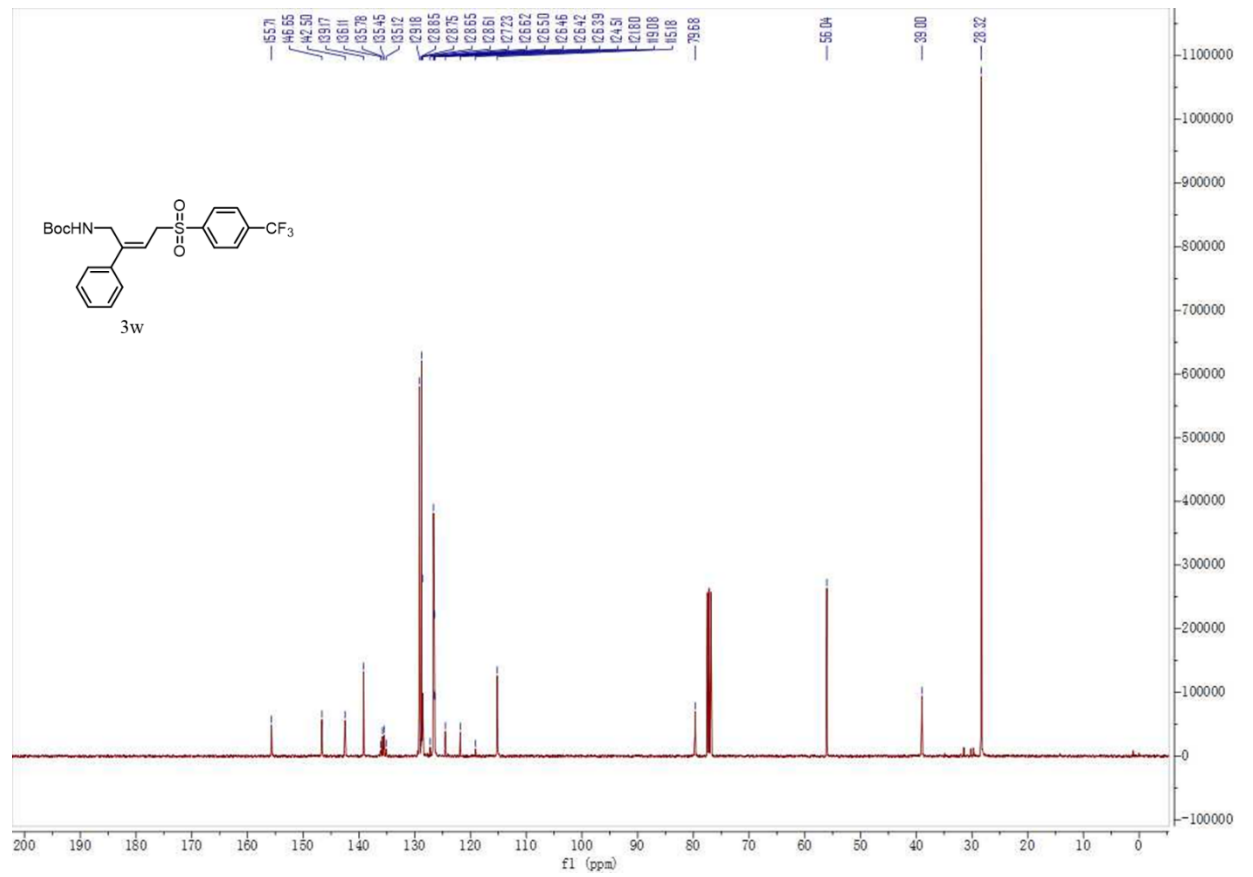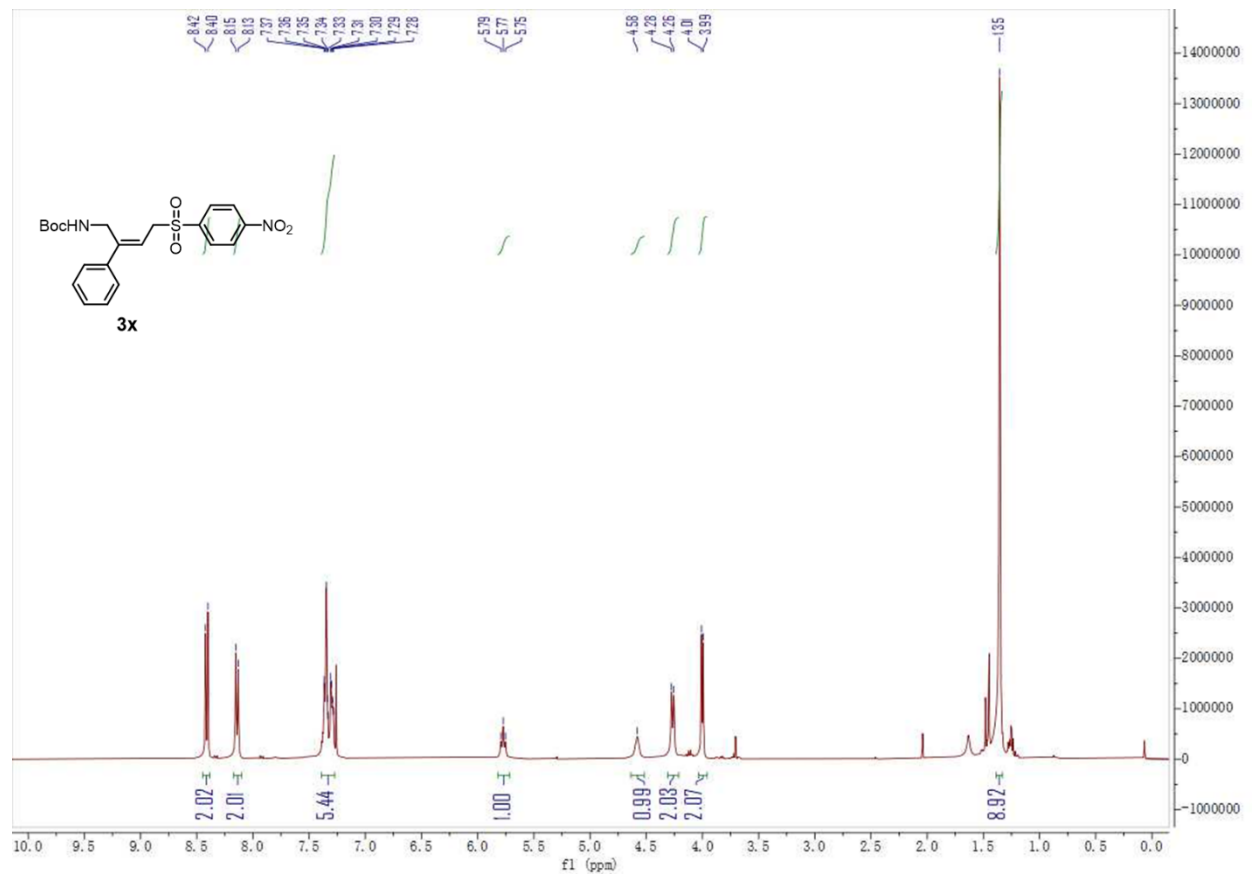

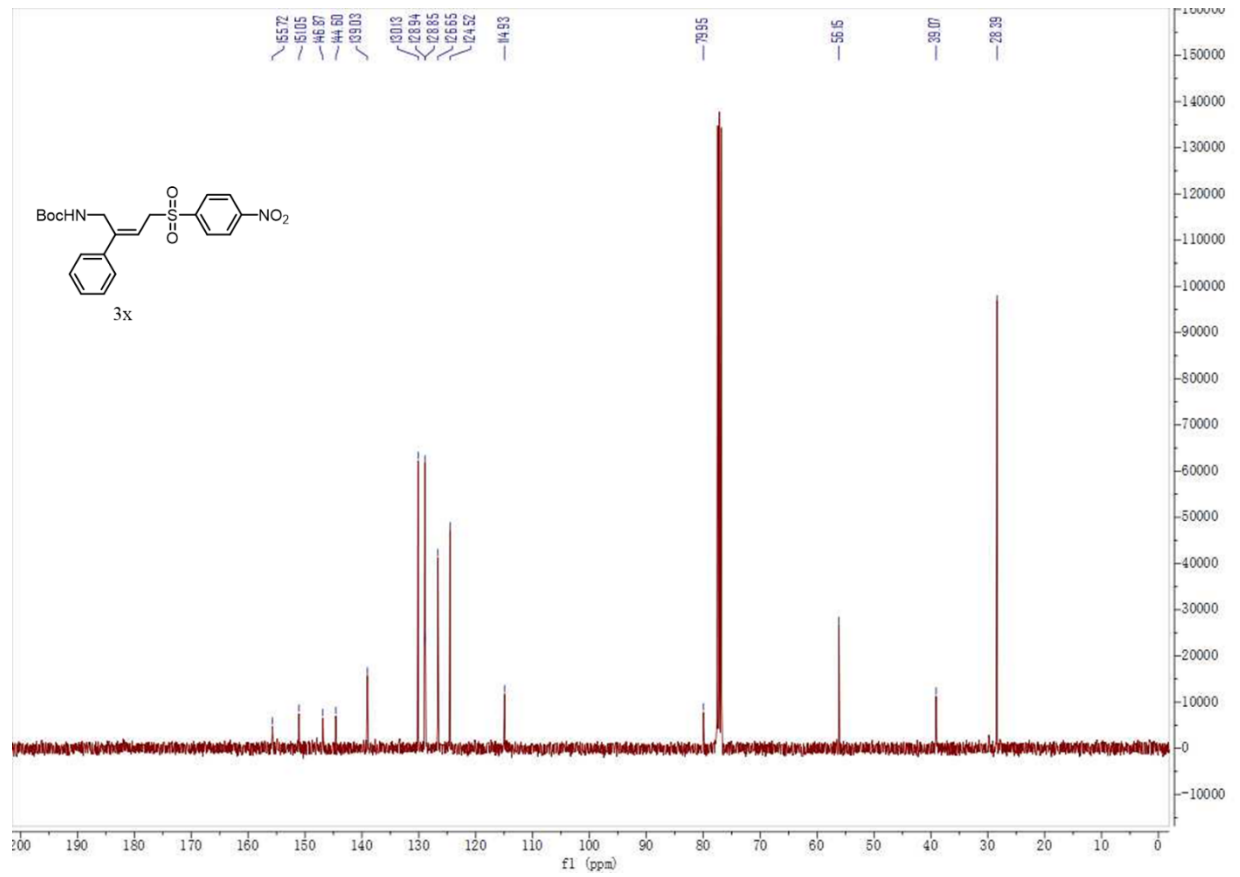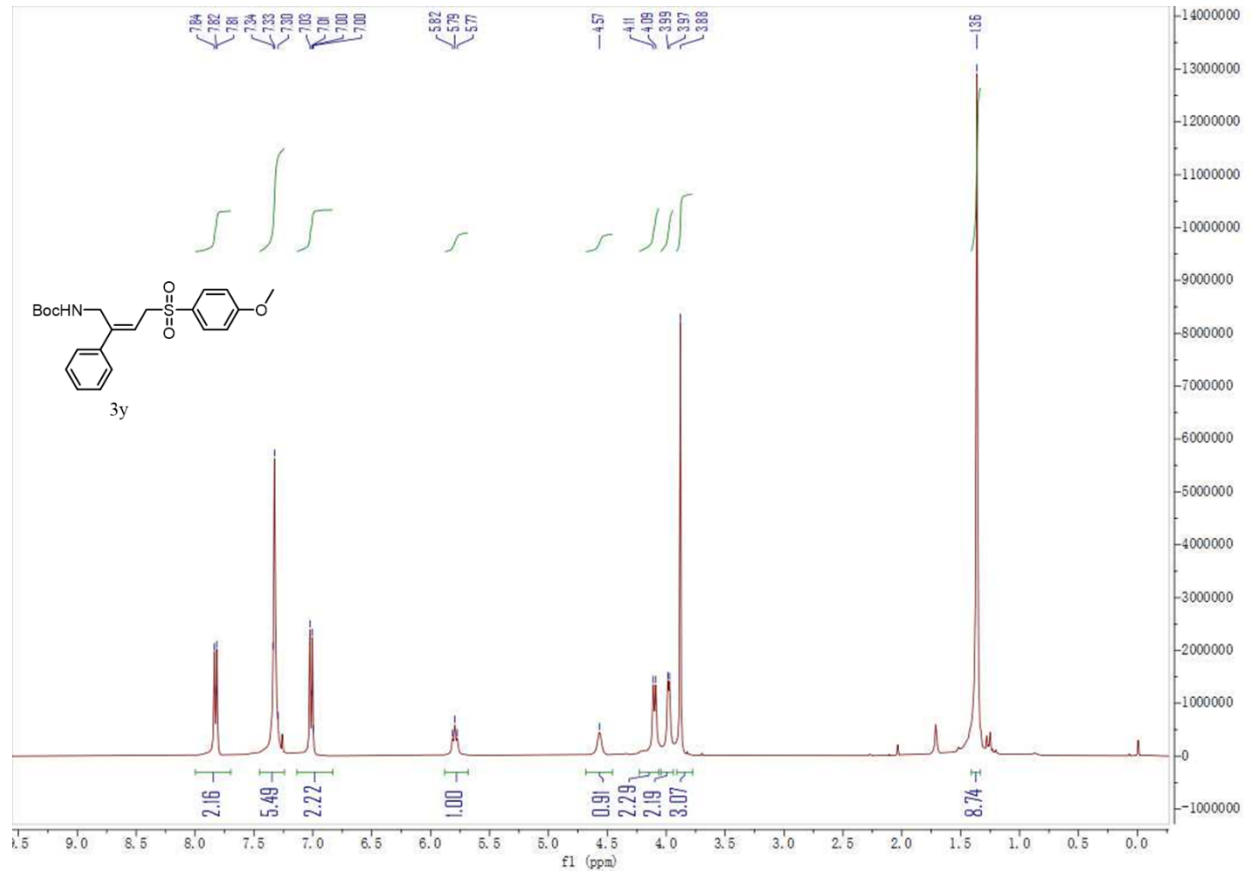

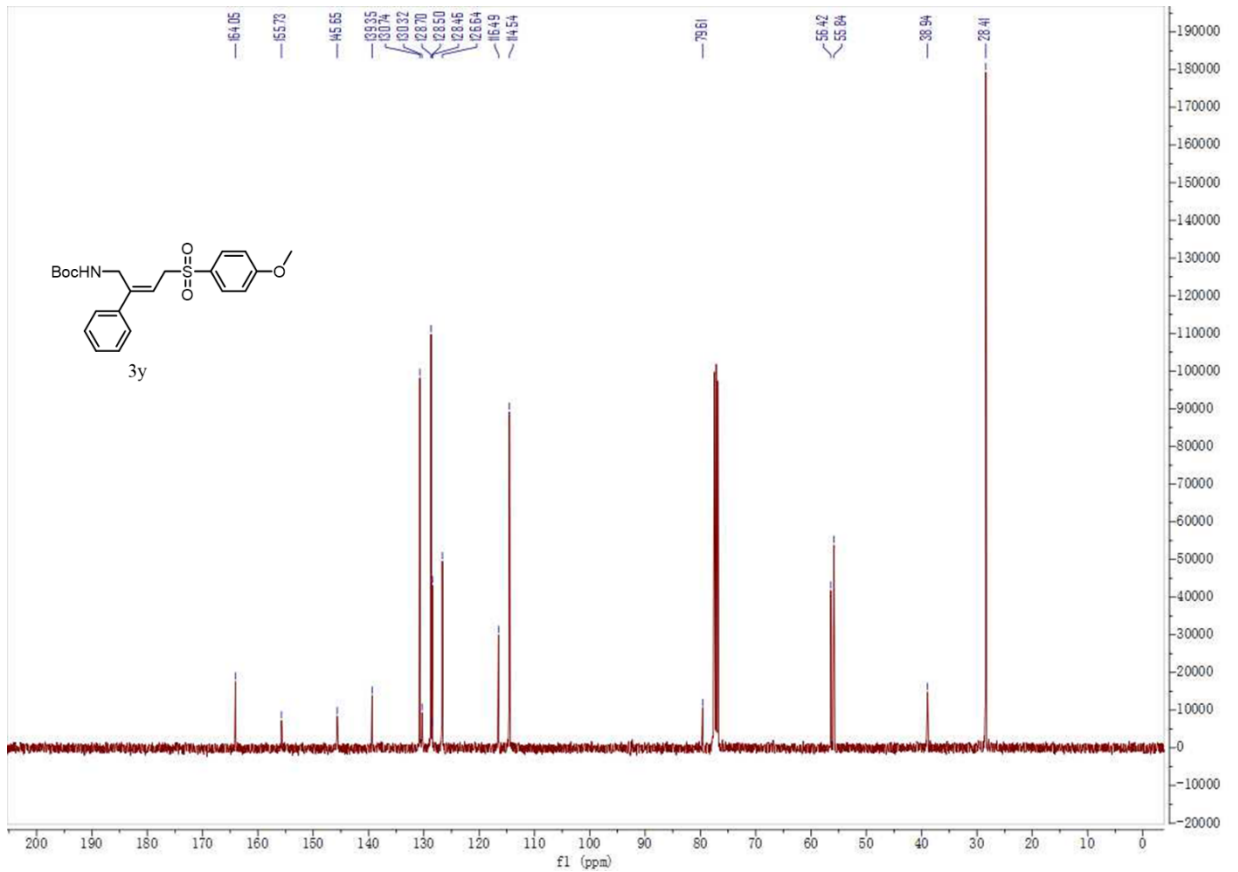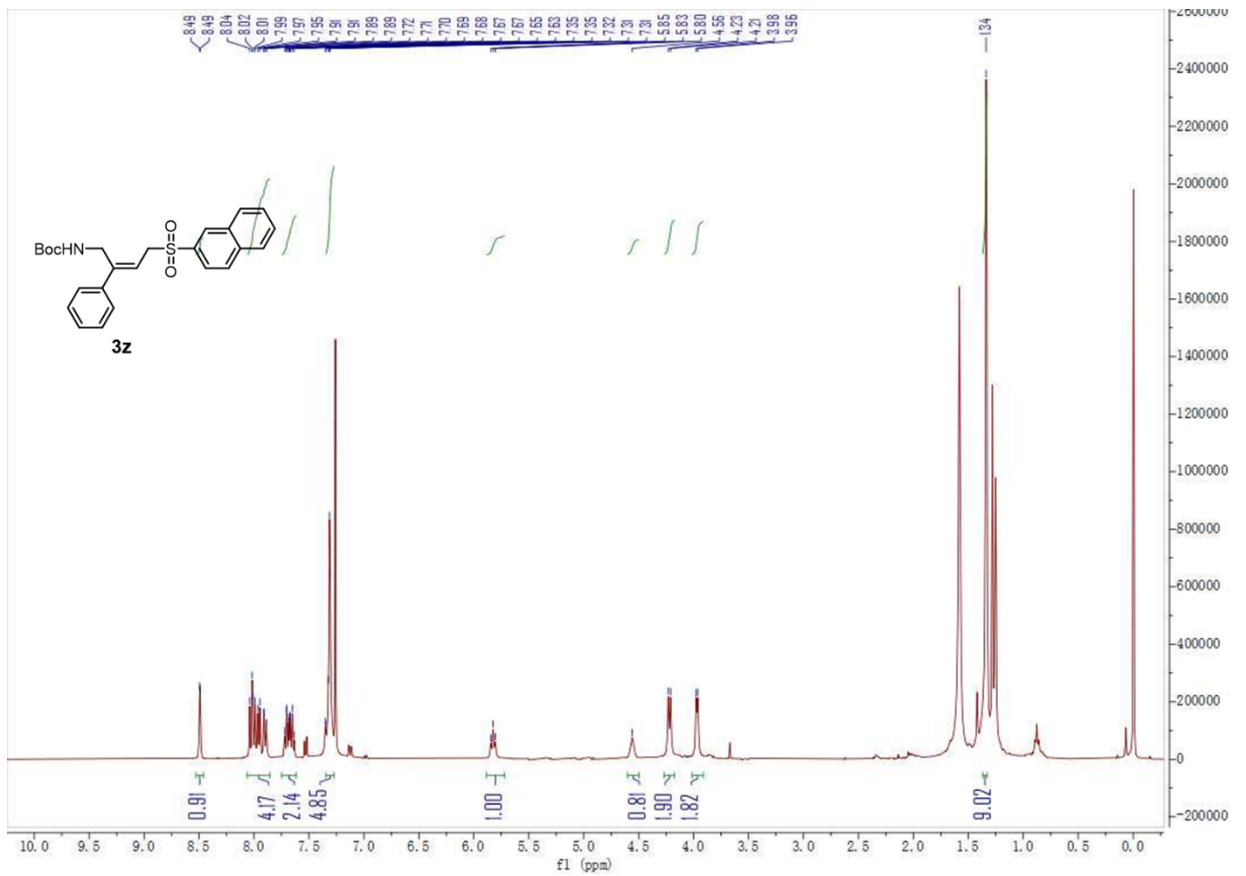

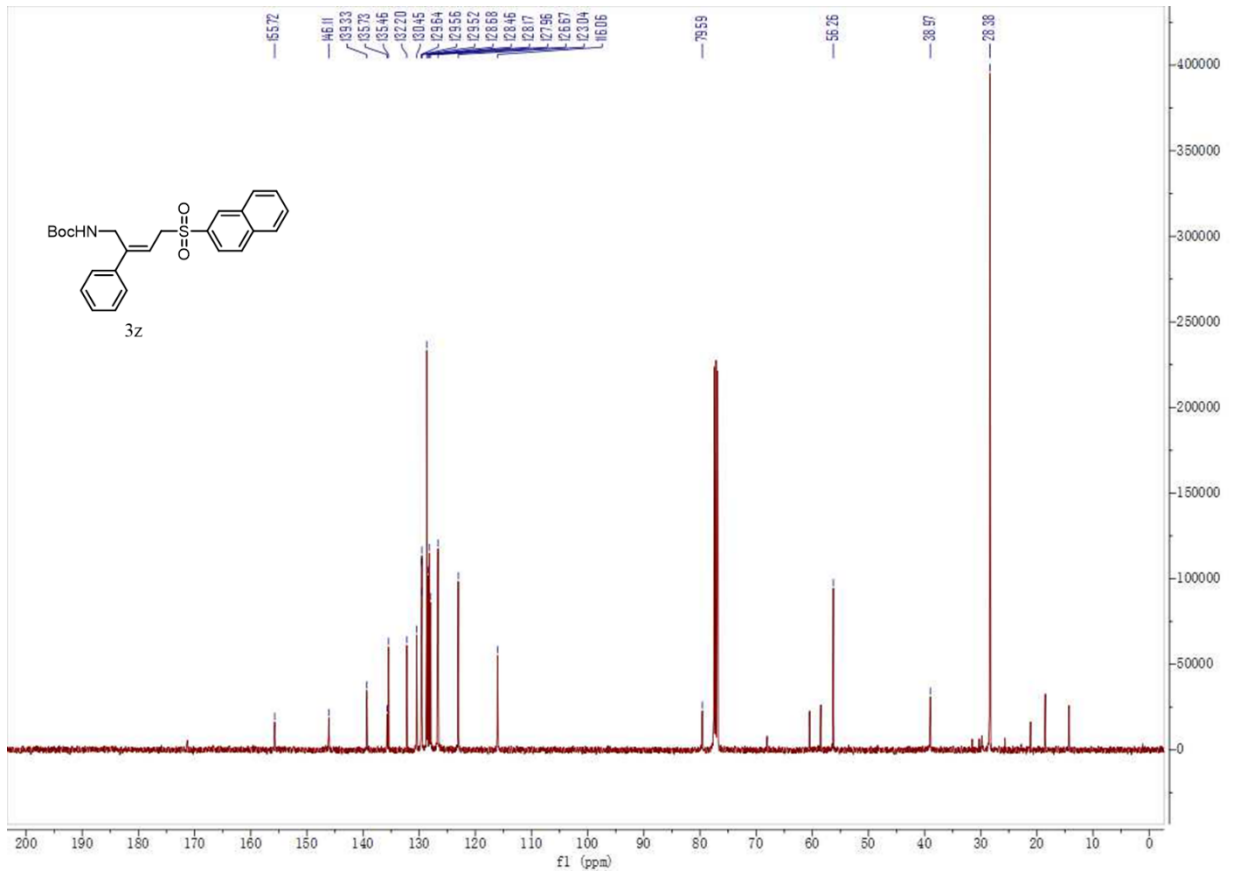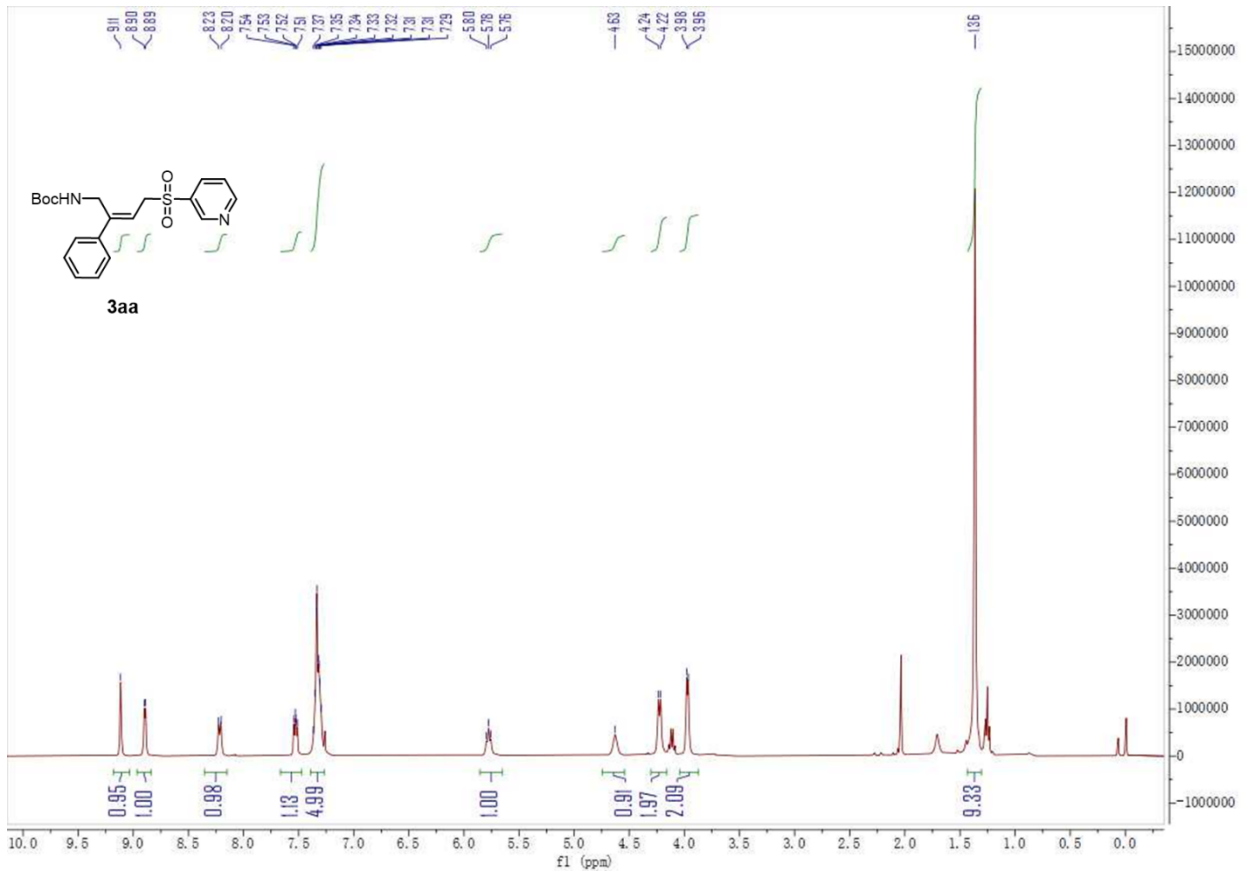

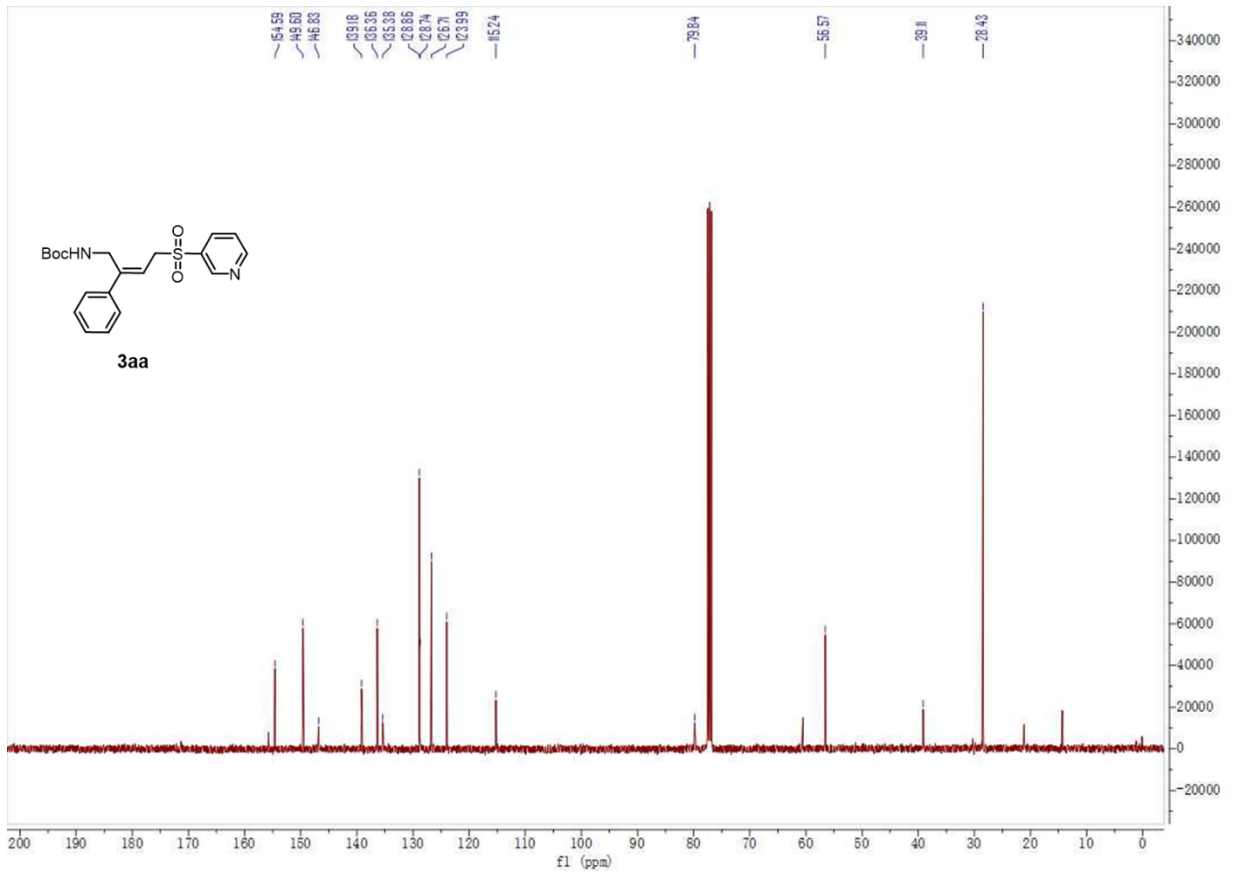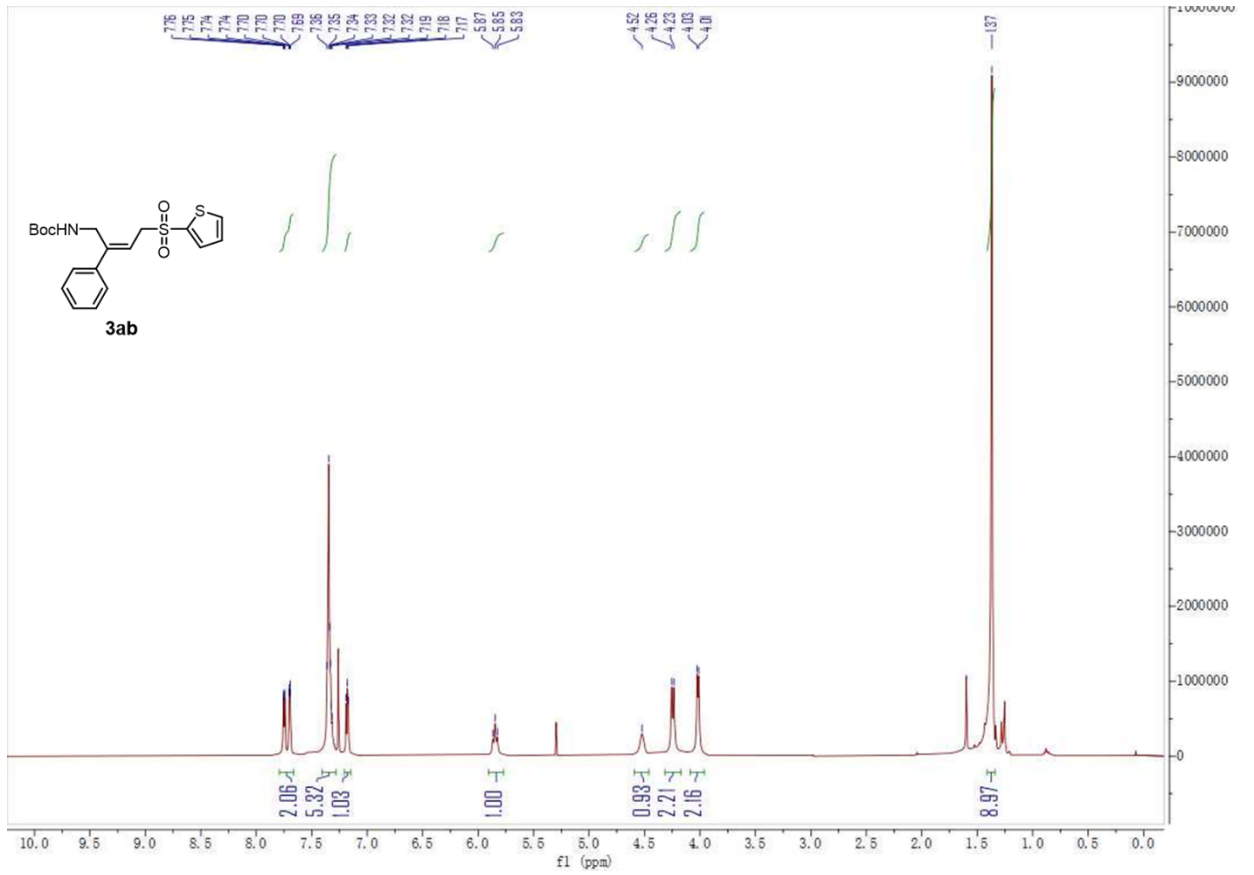

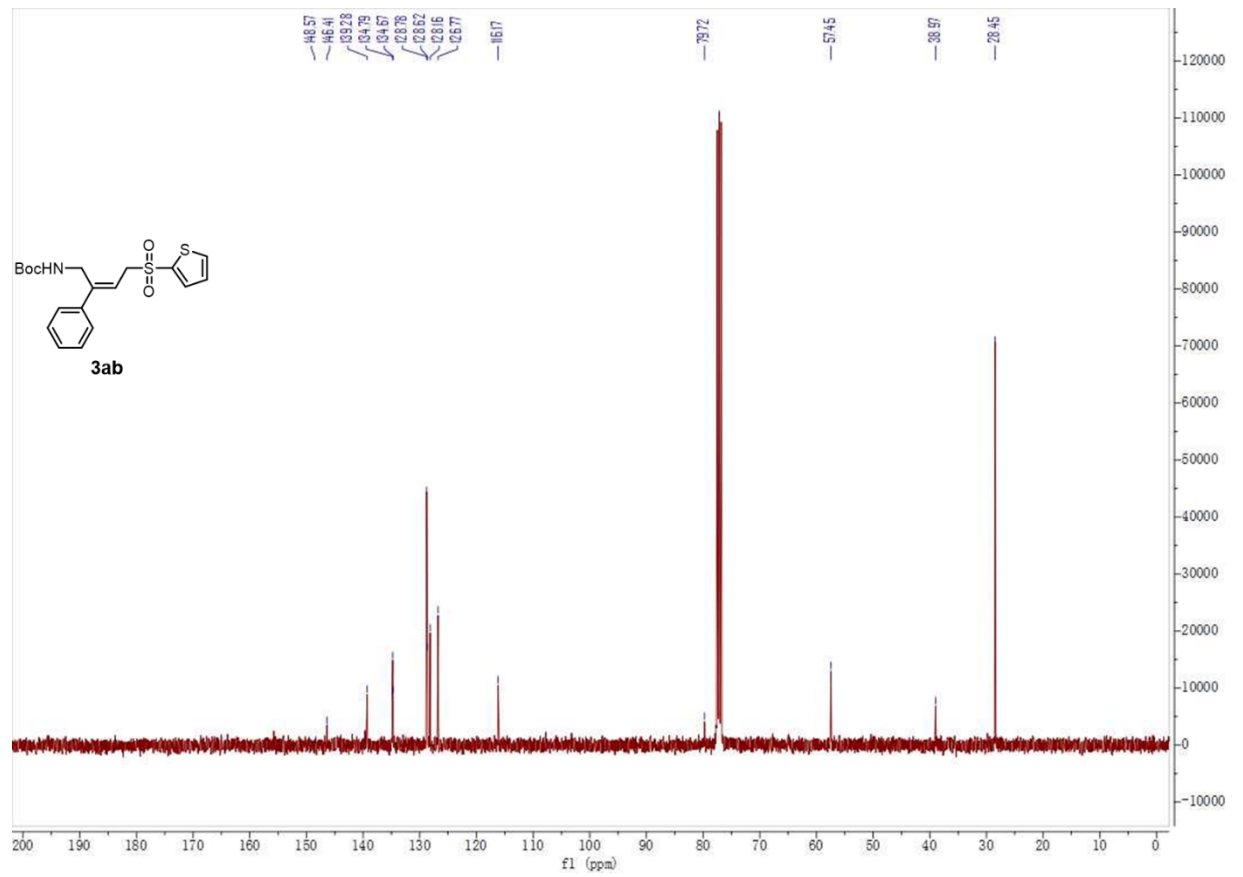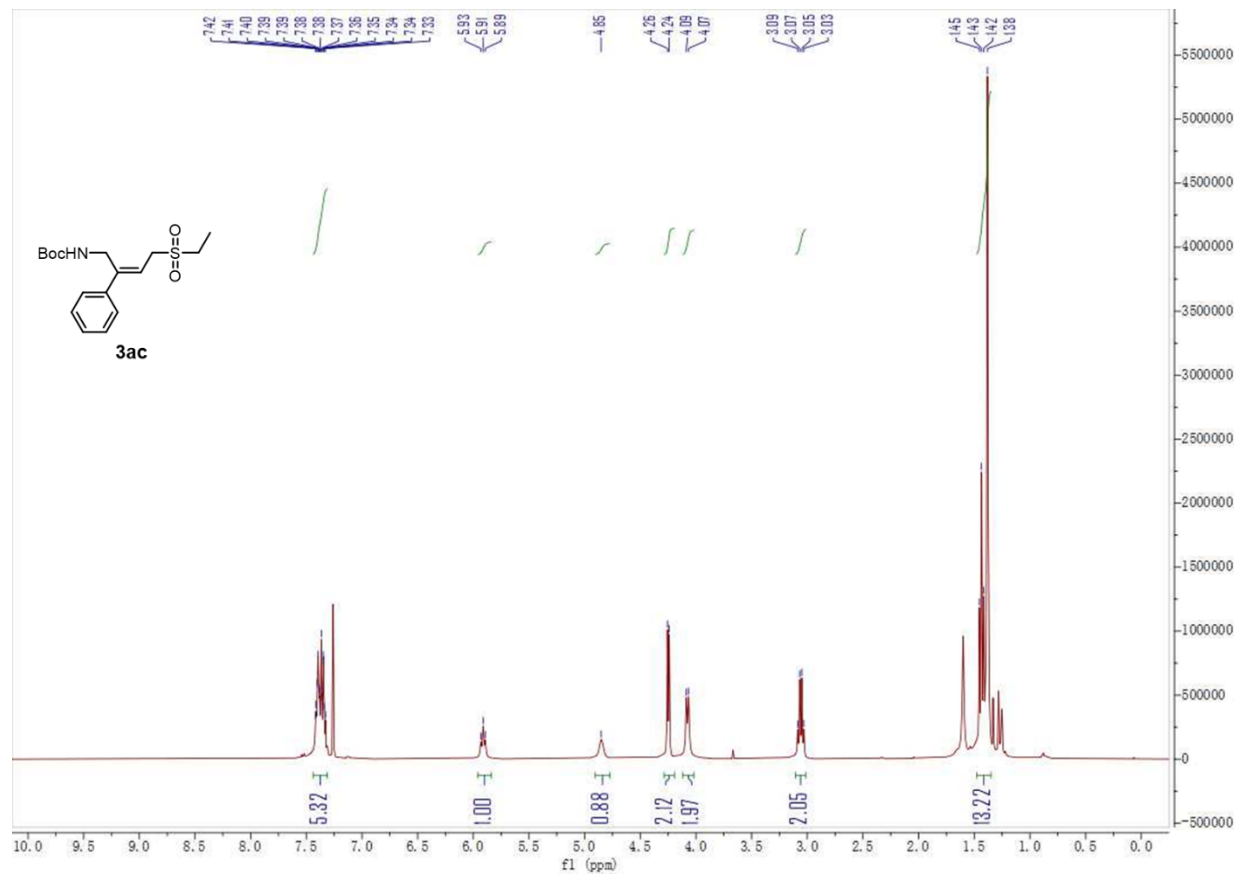

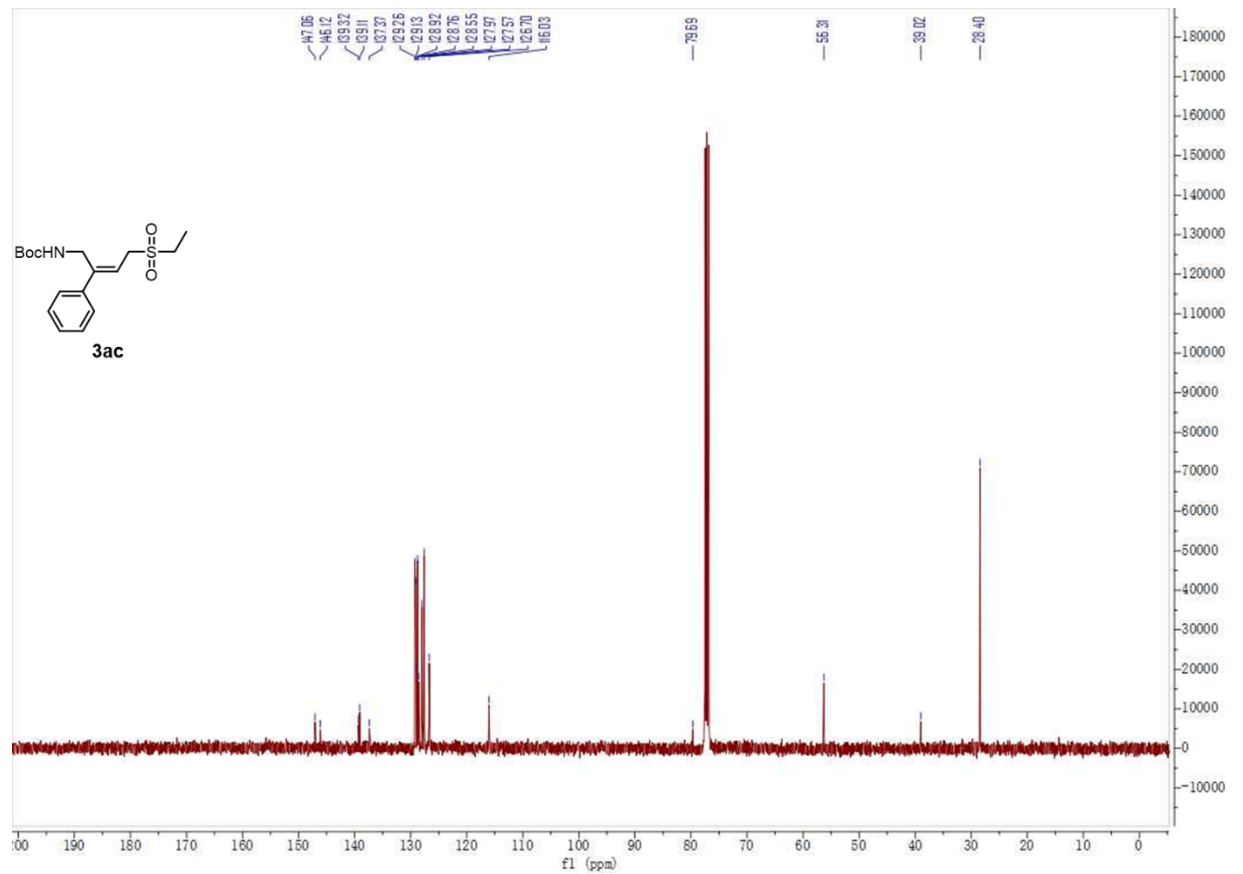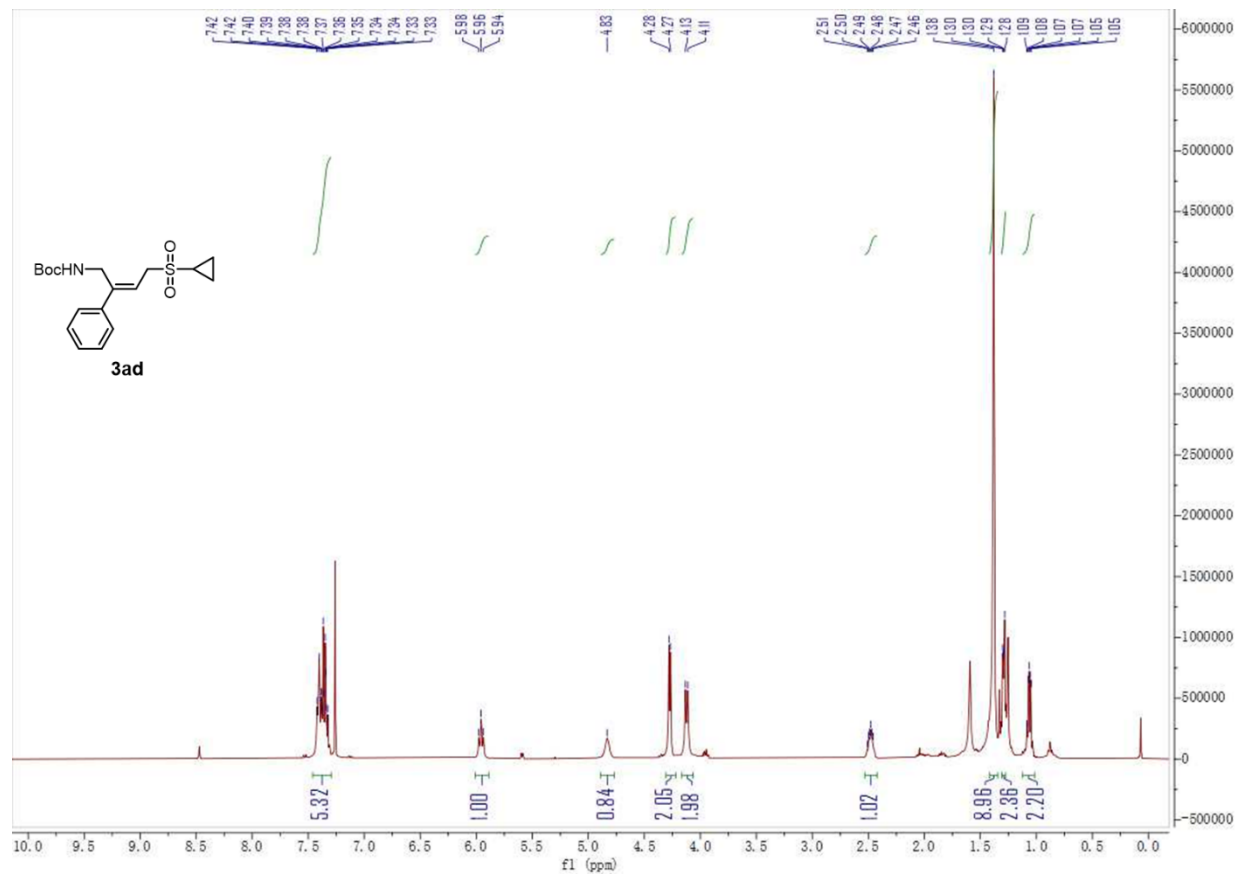

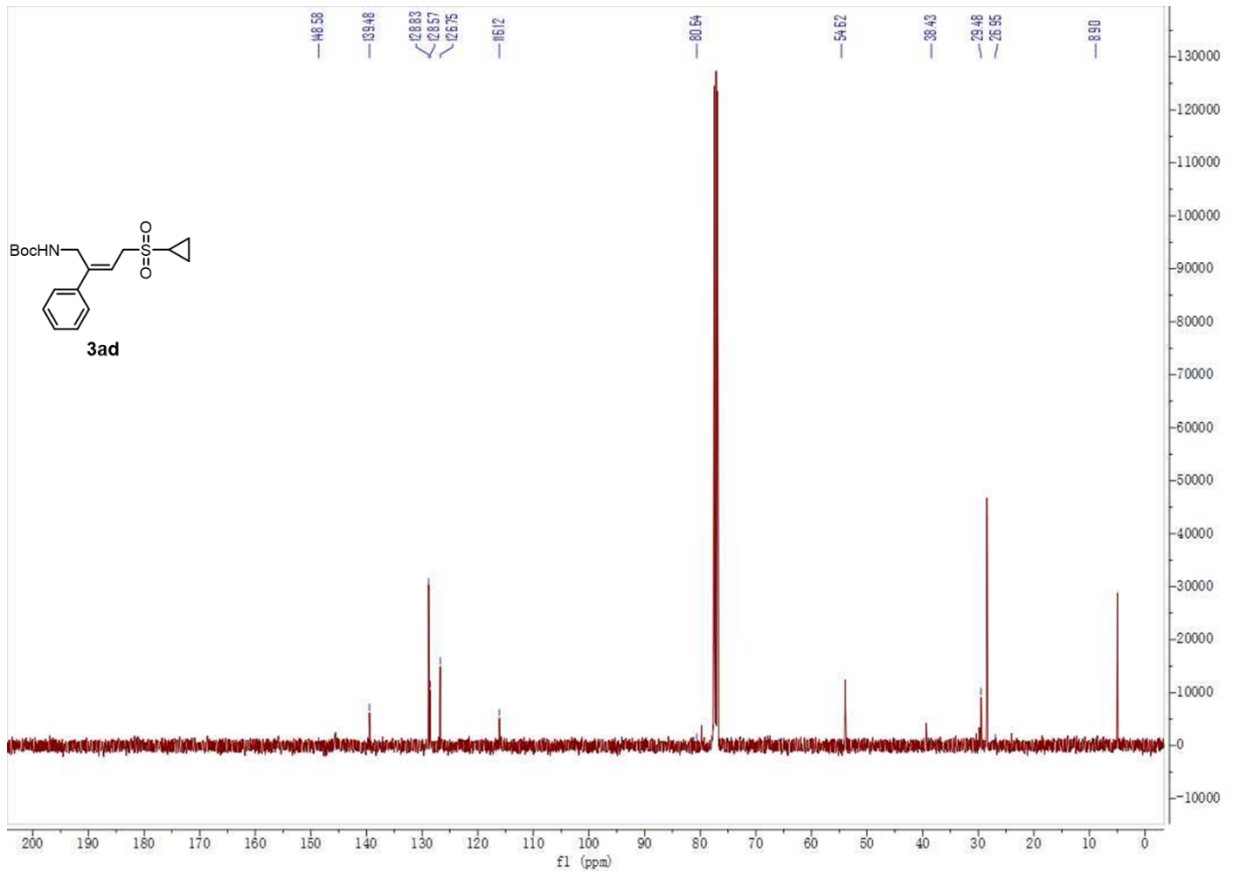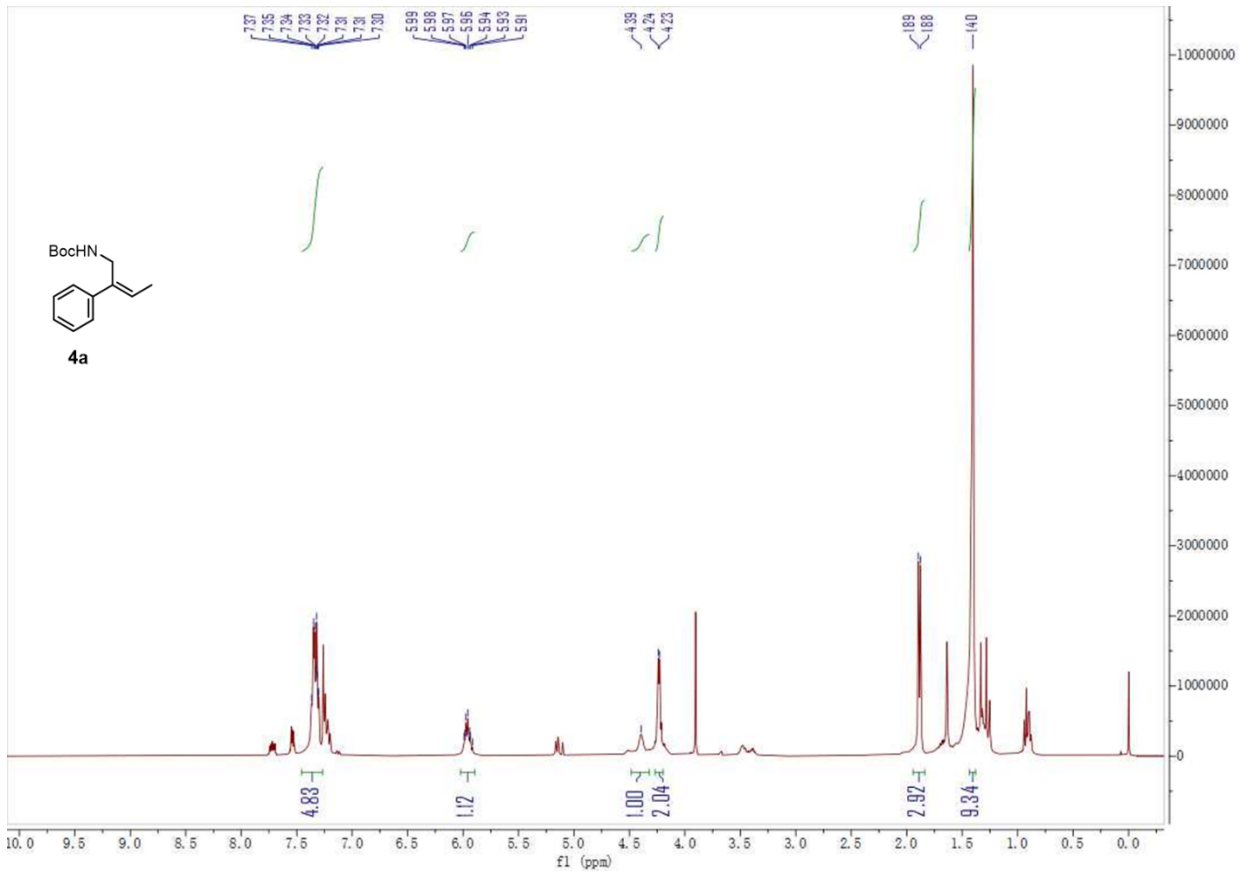



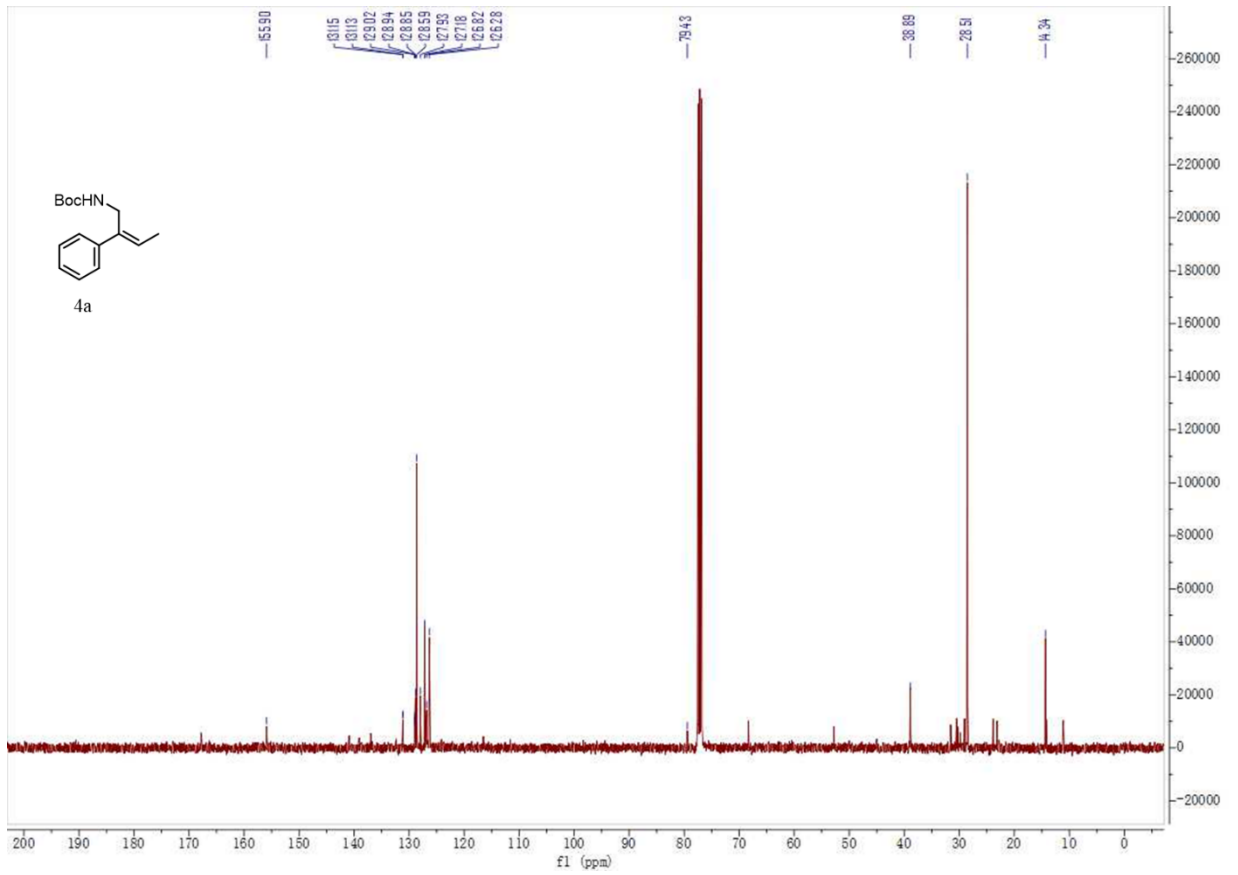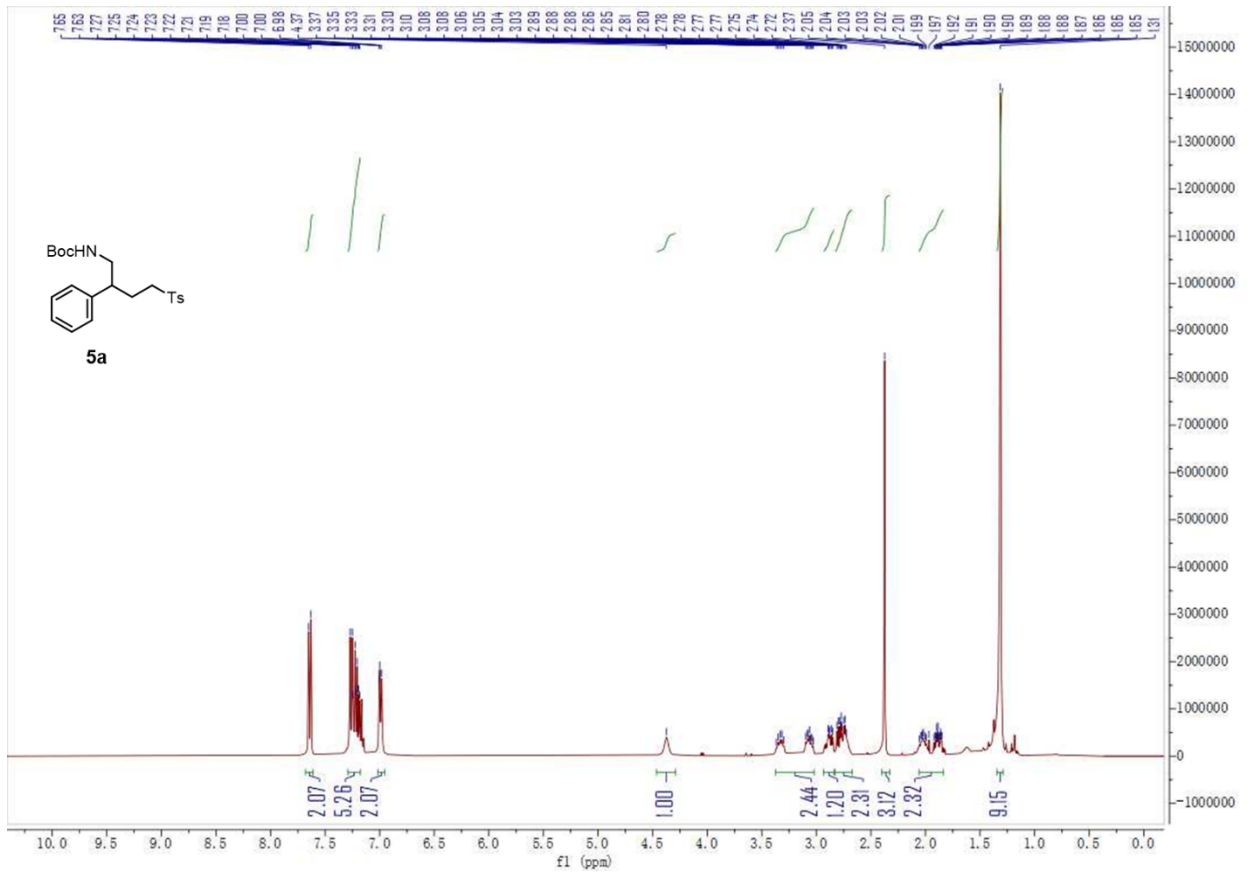

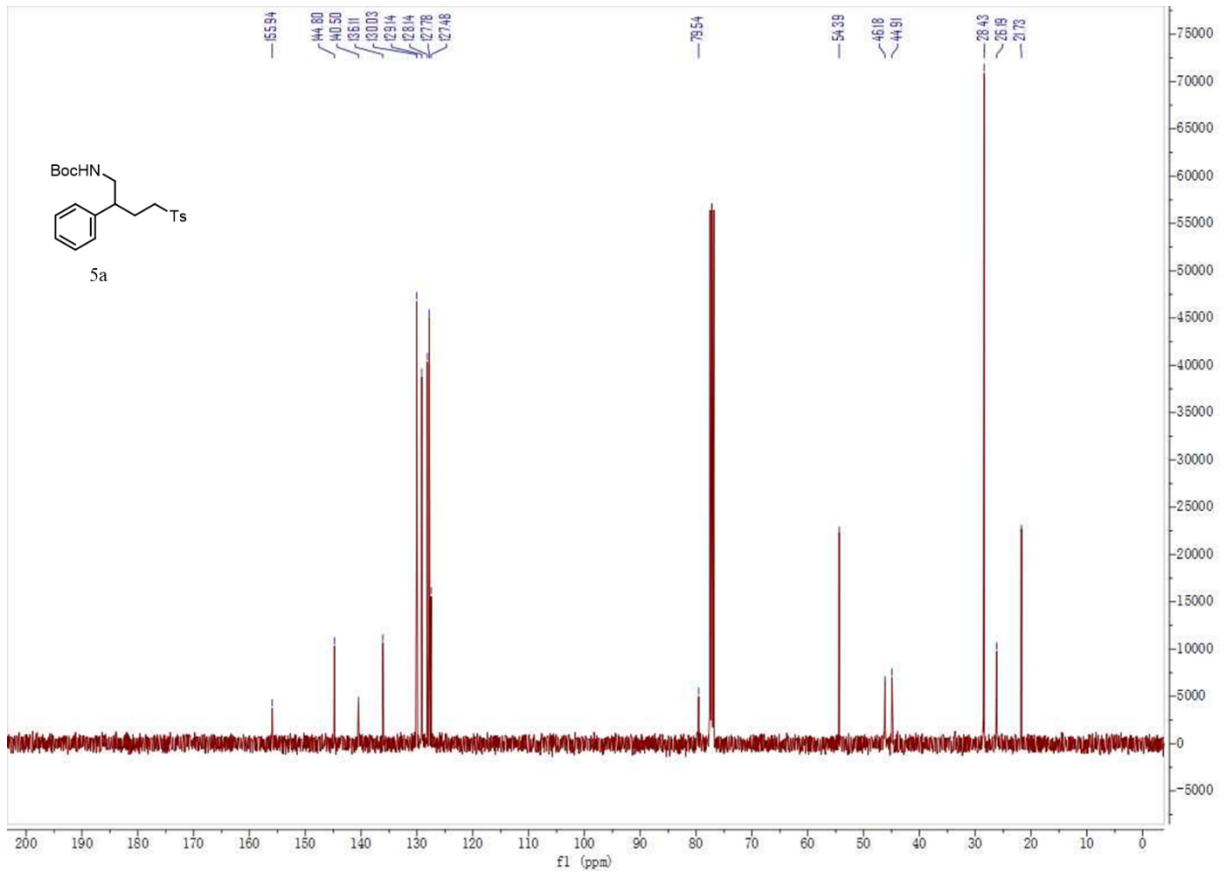

Supplement: d3cc02237d1.pdf [file d3cc02237d1.pdf]
